# Supplementary material for: In Silico Drug Screening with Mechanistic Insight: A Cross-Attention Framework for Predicting Drug-Gene Interactions
Source: Research Square preprint supplement (doi:10.21203/rs.3.rs-7303015/v1), 2025-08-08
Supplement: Supplementary file 1 [file 6ca05d56bf13cb736c0d6b13.xlsx]

## Sheet: Supplementary Table1
Supplementary Table 1. Generated Drug-Gene Prior Knowledge Dataset
drug_names	drug_smile		targeted_genes
N-(1-adamantylmethyl)-2-chloro-5-[3-(3-hydroxypropylamino)propyl]benzamide	C1C2CC3CC1CC(C2)(C3)CNC(=O)C4=C(C=CC(=C4)CCCNCCCO)Cl		P2RX7
4-[[(1R,3S)-5-hydroxy-2-adamantyl]amino]-1H-pyrrolo[2,3-b]pyridine-5-carboxamide	C1C2CC3CC(C2)(CC1C3NC4=C5C=CNC5=NC=C4C(=O)N)O		JAK1
4-[[(1R,3S)-5-hydroxy-2-adamantyl]amino]-1H-pyrrolo[2,3-b]pyridine-5-carboxamide	C1C2CC3CC(C2)(CC1C3NC4=C5C=CNC5=NC=C4C(=O)N)O		JAK2
4-[[(1R,3S)-5-hydroxy-2-adamantyl]amino]-1H-pyrrolo[2,3-b]pyridine-5-carboxamide	C1C2CC3CC(C2)(CC1C3NC4=C5C=CNC5=NC=C4C(=O)N)O		JAK3
6-benzyl-3-pyridin-4-yl-5,8-dihydro-1H-pyrazolo[4,3-g]quinazolin-7-one	C1C2=CC3=C(C=C2NC(=O)N1CC4=CC=CC=C4)NN=C3C5=CC=NC=C5		MAPK1
5-oxo-6H-benzo[b][1]benzazepine-11-carboxamide	C1C2=CC=CC=C2N(C3=CC=CC=C3C1=O)C(=O)N		SCN3A
5-oxo-6H-benzo[b][1]benzazepine-11-carboxamide	C1C2=CC=CC=C2N(C3=CC=CC=C3C1=O)C(=O)N		SCN8A
5-oxo-6H-benzo[b][1]benzazepine-11-carboxamide	C1C2=CC=CC=C2N(C3=CC=CC=C3C1=O)C(=O)N		SCN9A
(E)-1-(2-hydroxyphenyl)-3-[(1R,4R)-5-pyridin-2-yl-2,5-diazabicyclo[2.2.1]heptan-2-yl]prop-2-en-1-one	C1C2CN(C1CN2C3=CC=CC=N3)C=CC(=O)C4=CC=CC=C4O		PBRM1
(E)-1-(2-hydroxyphenyl)-3-[(1R,4R)-5-pyridin-2-yl-2,5-diazabicyclo[2.2.1]heptan-2-yl]prop-2-en-1-one	C1C2CN(C1CN2C3=CC=CC=N3)C=CC(=O)C4=CC=CC=C4O		SMARCA2
(E)-1-(2-hydroxyphenyl)-3-[(1R,4R)-5-pyridin-2-yl-2,5-diazabicyclo[2.2.1]heptan-2-yl]prop-2-en-1-one	C1C2CN(C1CN2C3=CC=CC=N3)C=CC(=O)C4=CC=CC=C4O		SMARCA4
(1S,8R)-4-(trifluoromethyl)-10-azatricyclo[6.3.1.02,7]dodeca-2(7),3,5-triene	C1C2CNCC1C3=C2C=CC(=C3)C(F)(F)F		CHRNB2
5,8,14-triazatetracyclo[10.3.1.02,11.04,9]hexadeca-2,4,6,8,10-pentaene	C1C2CNCC1C3=CC4=NC=CN=C4C=C23		CHRNB2
(1R,9S)-7,11-diazatricyclo[7.3.1.02,7]trideca-2,4-dien-6-one	C1C2CNCC1C3=CC=CC(=O)N3C2		CHRNB2
2,3,3a,4,6,6a-hexahydro-1H-pyrrolo[3,4-c]pyrrol-5-yl-(5-chlorofuran-2-yl)methanone	C1C2CN(CC2CN1)C(=O)C3=CC=C(O3)Cl		CHRNB2
(1S,5S)-3-(5,6-dichloropyridin-3-yl)-3,6-diazabicyclo[3.2.0]heptane	C1C2CN(CC2N1)C3=CC(=C(N=C3)Cl)Cl		CHRNB2
8-chloro-6-phenyl-4H-[1,2,4]triazolo[4,3-a][1,4]benzodiazepine	C1C2=NN=CN2C3=C(C=C(C=C3)Cl)C(=N1)C4=CC=CC=C4		GABRA2
8-chloro-6-phenyl-4H-[1,2,4]triazolo[4,3-a][1,4]benzodiazepine	C1C2=NN=CN2C3=C(C=C(C=C3)Cl)C(=N1)C4=CC=CC=C4		GABRA3
8-chloro-6-phenyl-4H-[1,2,4]triazolo[4,3-a][1,4]benzodiazepine	C1C2=NN=CN2C3=C(C=C(C=C3)Cl)C(=N1)C4=CC=CC=C4		GABRB3
8-chloro-6-phenyl-4H-[1,2,4]triazolo[4,3-a][1,4]benzodiazepine	C1C2=NN=CN2C3=C(C=C(C=C3)Cl)C(=N1)C4=CC=CC=C4		GABRE
8-chloro-6-phenyl-4H-[1,2,4]triazolo[4,3-a][1,4]benzodiazepine	C1C2=NN=CN2C3=C(C=C(C=C3)Cl)C(=N1)C4=CC=CC=C4		GABRP
4-[1-[[6-[[4-(trifluoromethyl)phenyl]methyl]-6-azaspiro[2.5]octane-7-carbonyl]amino]cyclopropyl]benzoic acid	C1CC12CCN(C(C2)C(=O)NC3(CC3)C4=CC=C(C=C4)C(=O)O)CC5=CC=C(C=C5)C(F)(F)F		PTGER4
4-[(2R,4R)-4-[[1-(2,2-difluoro-1,3-benzodioxol-5-yl)cyclopropanecarbonyl]amino]-7-(difluoromethoxy)-3,4-dihydro-2H-chromen-2-yl]benzoic acid	C1CC1(C2=CC3=C(C=C2)OC(O3)(F)F)C(=O)NC4CC(OC5=C4C=CC(=C5)OC(F)F)C6=CC=C(C=C6)C(=O)O		CFTR
N-[1-[(5-cyanopyridin-2-yl)methyl]pyrazol-3-yl]-2-[4-[1-(trifluoromethyl)cyclopropyl]phenyl]acetamide	C1CC1(C2=CC=C(C=C2)CC(=O)NC3=NN(C=C3)CC4=NC=C(C=C4)C#N)C(F)(F)F		CACNA1H
4-[(4-cyclopropylisoquinolin-3-yl)-[[4-(trifluoromethoxy)phenyl]methyl]sulfamoyl]benzoic acid	C1CC1C2=C(N=CC3=CC=CC=C32)N(CC4=CC=C(C=C4)OC(F)(F)F)S(=O)(=O)C5=CC=C(C=C5)C(=O)O		TRPM8
(3R)-N-[3-[5-(2-cyclopropylpyrimidin-5-yl)-1H-pyrrolo[2,3-b]pyridine-3-carbonyl]-2,4-difluorophenyl]-3-fluoropyrrolidine-1-sulfonamide	C1CC1C2=NC=C(C=N2)C3=CC4=C(NC=C4C(=O)C5=C(C=CC(=C5F)NS(=O)(=O)N6CCC(C6)F)F)N=C3		BRAF
7-chloro-1-(cyclopropylmethyl)-5-phenyl-3H-1,4-benzodiazepin-2-one	C1CC1CN2C(=O)CN=C(C3=C2C=CC(=C3)Cl)C4=CC=CC=C4		GABRA2
7-chloro-1-(cyclopropylmethyl)-5-phenyl-3H-1,4-benzodiazepin-2-one	C1CC1CN2C(=O)CN=C(C3=C2C=CC(=C3)Cl)C4=CC=CC=C4		GABRA3
7-chloro-1-(cyclopropylmethyl)-5-phenyl-3H-1,4-benzodiazepin-2-one	C1CC1CN2C(=O)CN=C(C3=C2C=CC(=C3)Cl)C4=CC=CC=C4		GABRB3
7-chloro-1-(cyclopropylmethyl)-5-phenyl-3H-1,4-benzodiazepin-2-one	C1CC1CN2C(=O)CN=C(C3=C2C=CC(=C3)Cl)C4=CC=CC=C4		GABRE
7-chloro-1-(cyclopropylmethyl)-5-phenyl-3H-1,4-benzodiazepin-2-one	C1CC1CN2C(=O)CN=C(C3=C2C=CC(=C3)Cl)C4=CC=CC=C4		GABRP
3-(cyclopropylmethoxy)-N-(3,5-dichloropyridin-4-yl)-4-(difluoromethoxy)benzamide	C1CC1COC2=C(C=CC(=C2)C(=O)NC3=C(C=NC=C3Cl)Cl)OC(F)F		PDE4B
3-(cyclopropylmethoxy)-N-(3,5-dichloropyridin-4-yl)-4-(difluoromethoxy)benzamide	C1CC1COC2=C(C=CC(=C2)C(=O)NC3=C(C=NC=C3Cl)Cl)OC(F)F		PDE4C
3-(cyclopropylmethoxy)-N-(3,5-dichloropyridin-4-yl)-4-(difluoromethoxy)benzamide	C1CC1COC2=C(C=CC(=C2)C(=O)NC3=C(C=NC=C3Cl)Cl)OC(F)F		PDE4D
4-[[3-[4-(cyclopropanecarbonyl)piperazine-1-carbonyl]-4-fluorophenyl]methyl]-2H-phthalazin-1-one	C1CC1C(=O)N2CCN(CC2)C(=O)C3=C(C=CC(=C3)CC4=NNC(=O)C5=CC=CC=C54)F		PARP3
N-[5-(3-fluoropyridin-4-yl)-6-pyridin-3-ylpyrazin-2-yl]cyclopropanecarboxamide	C1CC1C(=O)NC2=CN=C(C(=N2)C3=CN=CC=C3)C4=C(C=NC=C4)F		ADORA2B
1-N'-[4-[2-(cyclopropanecarbonylamino)pyridin-4-yl]oxy-2,5-difluorophenyl]-1-N-(4-fluorophenyl)cyclopropane-1,1-dicarboxamide	C1CC1C(=O)NC2=NC=CC(=C2)OC3=C(C=C(C(=C3)F)NC(=O)C4(CC4)C(=O)NC5=CC=C(C=C5)F)F		KDR
1-N'-[4-[2-(cyclopropanecarbonylamino)pyridin-4-yl]oxy-2,5-difluorophenyl]-1-N-(4-fluorophenyl)cyclopropane-1,1-dicarboxamide	C1CC1C(=O)NC2=NC=CC(=C2)OC3=C(C=C(C(=C3)F)NC(=O)C4(CC4)C(=O)NC5=CC=C(C=C5)F)F		MET
1-N'-[4-[2-(cyclopropanecarbonylamino)pyridin-4-yl]oxy-2,5-difluorophenyl]-1-N-(4-fluorophenyl)cyclopropane-1,1-dicarboxamide	C1CC1C(=O)NC2=NC=CC(=C2)OC3=C(C=C(C(=C3)F)NC(=O)C4(CC4)C(=O)NC5=CC=C(C=C5)F)F		NTRK1
1-N'-[4-[2-(cyclopropanecarbonylamino)pyridin-4-yl]oxy-2,5-difluorophenyl]-1-N-(4-fluorophenyl)cyclopropane-1,1-dicarboxamide	C1CC1C(=O)NC2=NC=CC(=C2)OC3=C(C=C(C(=C3)F)NC(=O)C4(CC4)C(=O)NC5=CC=C(C=C5)F)F		NTRK2
1-N'-[4-[2-(cyclopropanecarbonylamino)pyridin-4-yl]oxy-2,5-difluorophenyl]-1-N-(4-fluorophenyl)cyclopropane-1,1-dicarboxamide	C1CC1C(=O)NC2=NC=CC(=C2)OC3=C(C=C(C(=C3)F)NC(=O)C4(CC4)C(=O)NC5=CC=C(C=C5)F)F		NTRK3
N-[5-[4-[(1,1-dioxo-1,4-thiazinan-4-yl)methyl]phenyl]-[1,2,4]triazolo[1,5-a]pyridin-2-yl]cyclopropanecarboxamide	C1CC1C(=O)NC2=NN3C(=N2)C=CC=C3C4=CC=C(C=C4)CN5CCS(=O)(=O)CC5		JAK1
3-[3-(cyclopropanecarbonylamino)-1H-indazol-6-yl]-N-cyclopropylbenzamide	C1CC1C(=O)NC2=NNC3=C2C=CC(=C3)C4=CC(=CC=C4)C(=O)NC5CC5		CDC42BPB
2-(2-chloro-4-iodoanilino)-N-(cyclopropylmethoxy)-3,4-difluorobenzamide	C1CC1CONC(=O)C2=C(C(=C(C=C2)F)F)NC3=C(C=C(C=C3)I)Cl		MAP2K1
2-(2-chloro-4-iodoanilino)-N-(cyclopropylmethoxy)-3,4-difluorobenzamide	C1CC1CONC(=O)C2=C(C(=C(C=C2)F)F)NC3=C(C=C(C=C3)I)Cl		MAP2K2
(1R,2S)-2-phenylcyclopropan-1-amine	C1C(C1N)C2=CC=CC=C2		MAOA
(1R,2S)-2-phenylcyclopropan-1-amine	C1C(C1N)C2=CC=CC=C2		MAOB
6-N-cyclopropyl-2-N-quinolin-6-yl-7H-purine-2,6-diamine	C1CC1NC2=NC(=NC3=C2NC=N3)NC4=CC5=C(C=C4)N=CC=C5		EGFR
6-N-cyclopropyl-2-N-quinolin-6-yl-7H-purine-2,6-diamine	C1CC1NC2=NC(=NC3=C2NC=N3)NC4=CC5=C(C=C4)N=CC=C5		KDR
6-N-cyclopropyl-2-N-quinolin-6-yl-7H-purine-2,6-diamine	C1CC1NC2=NC(=NC3=C2NC=N3)NC4=CC5=C(C=C4)N=CC=C5		PDGFRB
6-N-cyclopropyl-2-N-quinolin-6-yl-7H-purine-2,6-diamine	C1CC1NC2=NC(=NC3=C2NC=N3)NC4=CC5=C(C=C4)N=CC=C5		PIK3CA
6-N-cyclopropyl-2-N-quinolin-6-yl-7H-purine-2,6-diamine	C1CC1NC2=NC(=NC3=C2NC=N3)NC4=CC5=C(C=C4)N=CC=C5		PIK3CB
6-N-cyclopropyl-2-N-quinolin-6-yl-7H-purine-2,6-diamine	C1CC1NC2=NC(=NC3=C2NC=N3)NC4=CC5=C(C=C4)N=CC=C5		PIK3CD
6-N-cyclopropyl-2-N-quinolin-6-yl-7H-purine-2,6-diamine	C1CC1NC2=NC(=NC3=C2NC=N3)NC4=CC5=C(C=C4)N=CC=C5		PIK3CG
6-N-cyclopropyl-2-N-quinolin-6-yl-7H-purine-2,6-diamine	C1CC1NC2=NC(=NC3=C2NC=N3)NC4=CC5=C(C=C4)N=CC=C5		PIK3R1
6-N-cyclopropyl-2-N-quinolin-6-yl-7H-purine-2,6-diamine	C1CC1NC2=NC(=NC3=C2NC=N3)NC4=CC5=C(C=C4)N=CC=C5		PIK3R3
1-cyclopropyl-3-[5-[6-(morpholin-4-ylmethyl)-1H-benzimidazol-2-yl]-1H-pyrazol-4-yl]urea	C1CC1NC(=O)NC2=C(NN=C2)C3=NC4=C(N3)C=C(C=C4)CN5CCOCC5		ABL1
1-cyclopropyl-3-[5-[6-(morpholin-4-ylmethyl)-1H-benzimidazol-2-yl]-1H-pyrazol-4-yl]urea	C1CC1NC(=O)NC2=C(NN=C2)C3=NC4=C(N3)C=C(C=C4)CN5CCOCC5		FLT3
1-cyclopropyl-3-[5-[6-(morpholin-4-ylmethyl)-1H-benzimidazol-2-yl]-1H-pyrazol-4-yl]urea	C1CC1NC(=O)NC2=C(NN=C2)C3=NC4=C(N3)C=C(C=C4)CN5CCOCC5		JAK2
1-cyclopropyl-3-[5-[6-(morpholin-4-ylmethyl)-1H-benzimidazol-2-yl]-1H-pyrazol-4-yl]urea	C1CC1NC(=O)NC2=C(NN=C2)C3=NC4=C(N3)C=C(C=C4)CN5CCOCC5		JAK3
1-cyclopropyl-3-[5-[6-(morpholin-4-ylmethyl)-1H-benzimidazol-2-yl]-1H-pyrazol-4-yl]urea	C1CC1NC(=O)NC2=C(NN=C2)C3=NC4=C(N3)C=C(C=C4)CN5CCOCC5		MERTK
1-cyclopropyl-3-[5-[6-(morpholin-4-ylmethyl)-1H-benzimidazol-2-yl]-1H-pyrazol-4-yl]urea	C1CC1NC(=O)NC2=C(NN=C2)C3=NC4=C(N3)C=C(C=C4)CN5CCOCC5		RET
1-cyclopropyl-3-[5-[6-(morpholin-4-ylmethyl)-1H-benzimidazol-2-yl]-1H-pyrazol-4-yl]urea	C1CC1NC(=O)NC2=C(NN=C2)C3=NC4=C(N3)C=C(C=C4)CN5CCOCC5		YES1
1-[5-(cyclopropylsulfamoyl)-2-thiophen-3-ylphenyl]-3-[3-(trifluoromethyl)phenyl]urea	C1CC1NS(=O)(=O)C2=CC(=C(C=C2)C3=CSC=C3)NC(=O)NC4=CC=CC(=C4)C(F)(F)F		IDH2
(3R,4R)-3-(1-azatricyclo[6.3.1.04,12]dodeca-2,4,6,8(12)-tetraen-3-yl)-4-(1H-indol-3-yl)pyrrolidine-2,5-dione	C1CC2=C3C(=CC=C2)C(=CN3C1)C4C(C(=O)NC4=O)C5=CNC6=CC=CC=C65		MET
(1R,4S,5S,6S)-4-amino-2,2-dioxo-2lambda6-thiabicyclo[3.1.0]hexane-4,6-dicarboxylic acid	C1C(C2C(C2S1(=O)=O)C(=O)O)(C(=O)O)N		GRM3
4-(5-chloro-2-hydroxyphenyl)-3-(2-hydroxyethyl)-6-(trifluoromethyl)-1H-quinolin-2-one	C1=CC2=C(C=C1C(F)(F)F)C(=C(C(=O)N2)CCO)C3=C(C=CC(=C3)Cl)O		KCNMA1
2-[5-oxo-6-[[5-(trifluoromethyl)-1,3-benzothiazol-2-yl]methyl]pyrazino[2,3-d]pyridazin-8-yl]acetic acid	C1=CC2=C(C=C1C(F)(F)F)N=C(S2)CN3C(=O)C4=NC=CN=C4C(=N3)CC(=O)O		AKR1B1
5-chloro-3H-1,3-benzoxazol-2-one	C1=CC2=C(C=C1Cl)NC(=O)O2		KCNN4
6-(trifluoromethoxy)-1,3-benzothiazol-2-amine	C1=CC2=C(C=C1OC(F)(F)F)SC(=N2)N		SCN3A
6-(trifluoromethoxy)-1,3-benzothiazol-2-amine	C1=CC2=C(C=C1OC(F)(F)F)SC(=N2)N		SCN8A
6-(trifluoromethoxy)-1,3-benzothiazol-2-amine	C1=CC2=C(C=C1OC(F)(F)F)SC(=N2)N		SCN9A
1,8-dihydroxyanthracene-9,10-dione	C1=CC2=C(C(=C1)O)C(=O)C3=C(C2=O)C=CC=C3O		RXRA
13-(1,3-dihydroxypropan-2-ylamino)-6,20-dihydroxy-3-[(2R,3R,4S,5S,6R)-3,4,5-trihydroxy-6-(hydroxymethyl)oxan-2-yl]-3,13,23-triazahexacyclo[14.7.0.02,10.04,9.011,15.017,22]tricosa-1,4(9),5,7,10,15,17(22),18,20-nonaene-12,14-dione	C1=CC2=C(C=C1O)NC3=C4C(=C5C(=C23)C(=O)N(C5=O)NC(CO)CO)C6=C(N4C7C(C(C(C(O7)CO)O)O)O)C=C(C=C6)O		TOP 1.00
4-[1-(1,3-benzothiazol-6-ylsulfonyl)-5-chloroindol-2-yl]butanoic acid	C1=CC2=C(C=C1S(=O)(=O)N3C4=C(C=C(C=C4)Cl)C=C3CCCC(=O)O)SC=N2		PPARG
7-(2-tricyclo[9.4.0.03,8]pentadeca-1(15),3,5,7,11,13-hexaenylamino)heptanoic acid	C1CC2=CC=CC=C2C(C3=CC=CC=C31)NCCCCCCC(=O)O		DRD2
13-chloro-2-piperidin-4-ylidene-4-azatricyclo[9.4.0.03,8]pentadeca-1(11),3(8),4,6,12,14-hexaene	C1CC2=C(C=CC(=C2)Cl)C(=C3CCNCC3)C4=C1C=CC=N4		HRH1
2-[4-[3-(quinolin-6-ylmethyl)triazolo[4,5-b]pyrazin-5-yl]pyrazol-1-yl]ethanol	C1=CC2=C(C=CC(=C2)CN3C4=NC(=CN=C4N=N3)C5=CN(N=C5)CCO)N=C1		MET
6-(2,4-dichlorophenyl)-5-[4-[(3S)-1-(3-fluoropropyl)pyrrolidin-3-yl]oxyphenyl]-8,9-dihydro-7H-benzo[7]annulene-2-carboxylic acid	C1CC2=C(C=CC(=C2)C(=O)O)C(=C(C1)C3=C(C=C(C=C3)Cl)Cl)C4=CC=C(C=C4)OC5CCN(C5)CCCF		ESR1
8-hydroxy-7-[(6-sulfonaphthalen-2-yl)diazenyl]quinoline-5-sulfonic acid	C1=CC2=C(C=C(C(=C2N=C1)O)N=NC3=CC4=C(C=C3)C=C(C=C4)S(=O)(=O)O)S(=O)(=O)O		PTPN11
8-hydroxy-7-[(6-sulfonaphthalen-2-yl)diazenyl]quinoline-5-sulfonic acid	C1=CC2=C(C=C(C(=C2N=C1)O)N=NC3=CC4=C(C=C3)C=C(C=C4)S(=O)(=O)O)S(=O)(=O)O		PTPN6
(5S)-5-hydroxy-5,6-dihydrobenzo[b][1]benzazepine-11-carboxamide	C1C(C2=CC=CC=C2N(C3=CC=CC=C31)C(=O)N)O		SCN3A
(5S)-5-hydroxy-5,6-dihydrobenzo[b][1]benzazepine-11-carboxamide	C1C(C2=CC=CC=C2N(C3=CC=CC=C31)C(=O)N)O		SCN8A
(5S)-5-hydroxy-5,6-dihydrobenzo[b][1]benzazepine-11-carboxamide	C1C(C2=CC=CC=C2N(C3=CC=CC=C31)C(=O)N)O		SCN9A
3-N-(1H-indol-5-yl)-5-pyridin-4-ylpyrazine-2,3-diamine	C1=CC2=C(C=CN2)C=C1NC3=NC(=CN=C3N)C4=CC=NC=C4		FLT3
7-pyridin-3-yl-1,7-diazaspiro[4.4]nonane	C1CC2(CCN(C2)C3=CN=CC=C3)NC1		CHRNB2
5-[(8aR)-3,4,6,7,8,8a-hexahydro-1H-pyrrolo[1,2-a]pyrazine-2-carbonyl]-4-chloro-2-fluoro-N-(2-fluorophenyl)benzenesulfonamide	C1CC2CN(CCN2C1)C(=O)C3=CC(=C(C=C3Cl)F)S(=O)(=O)NC4=CC=CC=C4F		CACNA1H
(2R,3R,4S,5R)-2-[(8R)-8-hydroxy-7,8-dihydro-4H-imidazo[4,5-d][1,3]diazepin-3-yl]-5-(hydroxymethyl)oxolane-3,4-diol	C1C(C2=C(NC=N1)N(C=N2)C3C(C(C(O3)CO)O)O)O		ADA
2-[(2-chloro-4-fluorophenyl)methyl]-3-(4-fluorophenyl)-7-(trifluoromethyl)indazole	C1=CC2=C(N(N=C2C(=C1)C(F)(F)F)CC3=C(C=C(C=C3)F)Cl)C4=CC=C(C=C4)F		NR1H3
(3S,3aR,6R,6aR)-2,3,3a,5,6,6a-hexahydrofuro[3,2-b]furan-3,6-diol	C1C(C2C(O1)C(CO2)O)O		BCL2
1-[4-[4-morpholin-4-yl-6-(3-oxa-8-azabicyclo[3.2.1]octan-8-yl)-1,3,5-triazin-2-yl]phenyl]-3-pyridin-4-ylurea	C1CC2COCC1N2C3=NC(=NC(=N3)N4CCOCC4)C5=CC=C(C=C5)NC(=O)NC6=CC=NC=C6		MTOR
1-[4-[4-morpholin-4-yl-6-(3-oxa-8-azabicyclo[3.2.1]octan-8-yl)-1,3,5-triazin-2-yl]phenyl]-3-pyridin-4-ylurea	C1CC2COCC1N2C3=NC(=NC(=N3)N4CCOCC4)C5=CC=C(C=C5)NC(=O)NC6=CC=NC=C6		PIK3CA
2-[(3S,6S,12S,20R,23S)-20-carbamoyl-12-[4-(diaminomethylideneamino)butyl]-3-(1H-indol-3-ylmethyl)-2,5,8,11,14,22-hexaoxo-17,18-dithia-1,4,7,10,13,21-hexazabicyclo[21.3.0]hexacosan-6-yl]acetic acid	C1CC2C(=O)NC(CSSCCC(=O)NC(C(=O)NCC(=O)NC(C(=O)NC(C(=O)N2C1)CC3=CNC4=CC=CC=C43)CC(=O)O)CCCCN=C(N)N)C(=O)N		ITGA2B
2-[(3S,6S,12S,20R,23S)-20-carbamoyl-12-[4-(diaminomethylideneamino)butyl]-3-(1H-indol-3-ylmethyl)-2,5,8,11,14,22-hexaoxo-17,18-dithia-1,4,7,10,13,21-hexazabicyclo[21.3.0]hexacosan-6-yl]acetic acid	C1CC2C(=O)NC(CSSCCC(=O)NC(C(=O)NCC(=O)NC(C(=O)NC(C(=O)N2C1)CC3=CNC4=CC=CC=C43)CC(=O)O)CCCCN=C(N)N)C(=O)N		ITGB3
(5Z)-5-[(4-pyridin-4-ylquinolin-6-yl)methylidene]-1,3-thiazolidine-2,4-dione	C1=CC2=NC=CC(=C2C=C1C=C3C(=O)NC(=O)S3)C4=CC=NC=C4		PIK3CA
(5Z)-5-[(4-pyridin-4-ylquinolin-6-yl)methylidene]-1,3-thiazolidine-2,4-dione	C1=CC2=NC=CC(=C2C=C1C=C3C(=O)NC(=O)S3)C4=CC=NC=C4		PIK3CB
(5Z)-5-[(4-pyridin-4-ylquinolin-6-yl)methylidene]-1,3-thiazolidine-2,4-dione	C1=CC2=NC=CC(=C2C=C1C=C3C(=O)NC(=O)S3)C4=CC=NC=C4		PIK3CD
(5Z)-5-[(4-pyridin-4-ylquinolin-6-yl)methylidene]-1,3-thiazolidine-2,4-dione	C1=CC2=NC=CC(=C2C=C1C=C3C(=O)NC(=O)S3)C4=CC=NC=C4		PIK3CG
(5Z)-5-[(4-pyridin-4-ylquinolin-6-yl)methylidene]-1,3-thiazolidine-2,4-dione	C1=CC2=NC=CC(=C2C=C1C=C3C(=O)NC(=O)S3)C4=CC=NC=C4		PIK3R1
(5Z)-5-[(4-pyridin-4-ylquinolin-6-yl)methylidene]-1,3-thiazolidine-2,4-dione	C1=CC2=NC=CC(=C2C=C1C=C3C(=O)NC(=O)S3)C4=CC=NC=C4		PIK3R3
(5Z)-5-(quinoxalin-6-ylmethylidene)-1,3-thiazolidine-2,4-dione	C1=CC2=NC=CN=C2C=C1C=C3C(=O)NC(=O)S3		PIK3CG
8-[4-(1-aminocyclobutyl)phenyl]-9-phenyl-2H-[1,2,4]triazolo[3,4-f][1,6]naphthyridin-3-one	C1CC(C1)(C2=CC=C(C=C2)C3=C(C=C4C(=N3)C=CN5C4=NNC5=O)C6=CC=CC=C6)N		AKT1
8-[4-(1-aminocyclobutyl)phenyl]-9-phenyl-2H-[1,2,4]triazolo[3,4-f][1,6]naphthyridin-3-one	C1CC(C1)(C2=CC=C(C=C2)C3=C(C=C4C(=N3)C=CN5C4=NNC5=O)C6=CC=CC=C6)N		AKT2
8-[4-(1-aminocyclobutyl)phenyl]-9-phenyl-2H-[1,2,4]triazolo[3,4-f][1,6]naphthyridin-3-one	C1CC(C1)(C2=CC=C(C=C2)C3=C(C=C4C(=N3)C=CN5C4=NNC5=O)C6=CC=CC=C6)N		AKT3
2-[4-(1-aminocyclobutyl)phenyl]-3-phenylimidazo[1,2-b]pyridazine-6-carboxamide	C1CC(C1)(C2=CC=C(C=C2)C3=C(N4C(=N3)C=CC(=N4)C(=O)N)C5=CC=CC=C5)N		AKT1
2-[4-(1-aminocyclobutyl)phenyl]-3-phenylimidazo[1,2-b]pyridazine-6-carboxamide	C1CC(C1)(C2=CC=C(C=C2)C3=C(N4C(=N3)C=CC(=N4)C(=O)N)C5=CC=CC=C5)N		AKT2
3-[3-[4-(1-aminocyclobutyl)phenyl]-5-phenylimidazo[4,5-b]pyridin-2-yl]pyridin-2-amine	C1CC(C1)(C2=CC=C(C=C2)N3C4=C(C=CC(=N4)C5=CC=CC=C5)N=C3C6=C(N=CC=C6)N)N		AKT1
3-[3-[4-(1-aminocyclobutyl)phenyl]-5-phenylimidazo[4,5-b]pyridin-2-yl]pyridin-2-amine	C1CC(C1)(C2=CC=C(C=C2)N3C4=C(C=CC(=N4)C5=CC=CC=C5)N=C3C6=C(N=CC=C6)N)N		AKT2
3-[3-[4-(1-aminocyclobutyl)phenyl]-5-phenylimidazo[4,5-b]pyridin-2-yl]pyridin-2-amine	C1CC(C1)(C2=CC=C(C=C2)N3C4=C(C=CC(=N4)C5=CC=CC=C5)N=C3C6=C(N=CC=C6)N)N		AKT3
1-[2-[[3-fluoro-1-(3-fluoropyridin-2-yl)cyclobutyl]methylamino]pyrimidin-5-yl]pyrrole-3-carboxamide	C1C(CC1(CNC2=NC=C(C=N2)N3C=CC(=C3)C(=O)N)C4=C(C=CC=N4)F)F		TNNI2
1-[2-[[3-fluoro-1-(3-fluoropyridin-2-yl)cyclobutyl]methylamino]pyrimidin-5-yl]pyrrole-3-carboxamide	C1C(CC1(CNC2=NC=C(C=N2)N3C=CC(=C3)C(=O)N)C4=C(C=CC=N4)F)F		TNNT3
3,7-bis(cyclopropylmethyl)spiro[3,7-diazabicyclo[3.3.1]nonane-9,1'-cyclopentane]	C1CCC2(C1)C3CN(CC2CN(C3)CC4CC4)CC5CC5		KCNC3
3,7-bis(cyclopropylmethyl)spiro[3,7-diazabicyclo[3.3.1]nonane-9,1'-cyclopentane]	C1CCC2(C1)C3CN(CC2CN(C3)CC4CC4)CC5CC5		KCNG1
3,7-bis(cyclopropylmethyl)spiro[3,7-diazabicyclo[3.3.1]nonane-9,1'-cyclopentane]	C1CCC2(C1)C3CN(CC2CN(C3)CC4CC4)CC5CC5		KCNH2
3,7-bis(cyclopropylmethyl)spiro[3,7-diazabicyclo[3.3.1]nonane-9,1'-cyclopentane]	C1CCC2(C1)C3CN(CC2CN(C3)CC4CC4)CC5CC5		KCNH3
3,7-bis(cyclopropylmethyl)spiro[3,7-diazabicyclo[3.3.1]nonane-9,1'-cyclopentane]	C1CCC2(C1)C3CN(CC2CN(C3)CC4CC4)CC5CC5		KCNQ1
3,7-bis(cyclopropylmethyl)spiro[3,7-diazabicyclo[3.3.1]nonane-9,1'-cyclopentane]	C1CCC2(C1)C3CN(CC2CN(C3)CC4CC4)CC5CC5		KCNQ2
3,7-bis(cyclopropylmethyl)spiro[3,7-diazabicyclo[3.3.1]nonane-9,1'-cyclopentane]	C1CCC2(C1)C3CN(CC2CN(C3)CC4CC4)CC5CC5		KCNQ5
3,7-bis(cyclopropylmethyl)spiro[3,7-diazabicyclo[3.3.1]nonane-9,1'-cyclopentane]	C1CCC2(C1)C3CN(CC2CN(C3)CC4CC4)CC5CC5		KCNS3
8-[4-[4-(1,2-benzothiazol-3-yl)piperazin-1-yl]butyl]-8-azaspiro[4.5]decane-7,9-dione	C1CCC2(C1)CC(=O)N(C(=O)C2)CCCCN3CCN(CC3)C4=NSC5=CC=CC=C54		MAPK10
2-[(8R)-8-(3,5-difluorophenyl)-10-oxo-6,9-diazaspiro[4.5]decan-9-yl]-N-[(2R)-2'-oxospiro[1,3-dihydroindene-2,3'-1H-pyrrolo[2,3-b]pyridine]-5-yl]acetamide	C1CCC2(C1)C(=O)N(C(CN2)C3=CC(=CC(=C3)F)F)CC(=O)NC4=CC5=C(CC6(C5)C7=C(NC6=O)N=CC=C7)C=C4		CALCRL
benzo[b][1]benzazepine-11-carboxamide	C1=CC=C2C(=C1)C=CC3=CC=CC=C3N2C(=O)N		SCN3A
benzo[b][1]benzazepine-11-carboxamide	C1=CC=C2C(=C1)C=CC3=CC=CC=C3N2C(=O)N		SCN8A
benzo[b][1]benzazepine-11-carboxamide	C1=CC=C2C(=C1)C=CC3=CC=CC=C3N2C(=O)N		SCN9A
1-[(2-hydroxynaphthalen-1-yl)disulfanyl]naphthalen-2-ol	C1=CC=C2C(=C1)C=CC(=C2SSC3=C(C=CC4=CC=CC=C43)O)O		PAK1
4-(5-pyridin-2-yl-1H-pyrazol-4-yl)quinoline	C1=CC=C2C(=C1)C(=CC=N2)C3=C(NN=C3)C4=CC=CC=N4		TGFBR1
3-(quinolin-4-ylmethylamino)-N-[4-(trifluoromethoxy)phenyl]thiophene-2-carboxamide	C1=CC=C2C(=C1)C(=CC=N2)CNC3=C(SC=C3)C(=O)NC4=CC=C(C=C4)OC(F)(F)F		FLT1
3-(quinolin-4-ylmethylamino)-N-[4-(trifluoromethoxy)phenyl]thiophene-2-carboxamide	C1=CC=C2C(=C1)C(=CC=N2)CNC3=C(SC=C3)C(=O)NC4=CC=C(C=C4)OC(F)(F)F		FLT4
3-(quinolin-4-ylmethylamino)-N-[4-(trifluoromethoxy)phenyl]thiophene-2-carboxamide	C1=CC=C2C(=C1)C(=CC=N2)CNC3=C(SC=C3)C(=O)NC4=CC=C(C=C4)OC(F)(F)F		KDR
3-(quinolin-4-ylmethylamino)-N-[4-(trifluoromethoxy)phenyl]thiophene-2-carboxamide	C1=CC=C2C(=C1)C(=CC=N2)CNC3=C(SC=C3)C(=O)NC4=CC=C(C=C4)OC(F)(F)F		KIT
N'-(1H-benzimidazol-2-ylmethyl)-N'-[(8S)-5,6,7,8-tetrahydroquinolin-8-yl]butane-1,4-diamine	C1CC(C2=C(C1)C=CC=N2)N(CCCCN)CC3=NC4=CC=CC=C4N3		CXCR4
2,4-dichloro-N-(3,5-dichloro-4-quinolin-3-yloxyphenyl)benzenesulfonamide	C1=CC=C2C(=C1)C=C(C=N2)OC3=C(C=C(C=C3Cl)NS(=O)(=O)C4=C(C=C(C=C4)Cl)Cl)Cl		PPARG
2-[1-[(4-chlorophenyl)methyl]indol-3-yl]-2-oxo-N-pyridin-4-ylacetamide	C1=CC=C2C(=C1)C(=CN2CC3=CC=C(C=C3)Cl)C(=O)C(=O)NC4=CC=NC=C4		TUBA1A
2-[1-[(4-chlorophenyl)methyl]indol-3-yl]-2-oxo-N-pyridin-4-ylacetamide	C1=CC=C2C(=C1)C(=CN2CC3=CC=C(C=C3)Cl)C(=O)C(=O)NC4=CC=NC=C4		TUBA1C
2-[1-[(4-chlorophenyl)methyl]indol-3-yl]-2-oxo-N-pyridin-4-ylacetamide	C1=CC=C2C(=C1)C(=CN2CC3=CC=C(C=C3)Cl)C(=O)C(=O)NC4=CC=NC=C4		TUBA3C
2-[1-[(4-chlorophenyl)methyl]indol-3-yl]-2-oxo-N-pyridin-4-ylacetamide	C1=CC=C2C(=C1)C(=CN2CC3=CC=C(C=C3)Cl)C(=O)C(=O)NC4=CC=NC=C4		TUBA4A
2-[1-[(4-chlorophenyl)methyl]indol-3-yl]-2-oxo-N-pyridin-4-ylacetamide	C1=CC=C2C(=C1)C(=CN2CC3=CC=C(C=C3)Cl)C(=O)C(=O)NC4=CC=NC=C4		TUBB2A
2-[1-[(4-chlorophenyl)methyl]indol-3-yl]-2-oxo-N-pyridin-4-ylacetamide	C1=CC=C2C(=C1)C(=CN2CC3=CC=C(C=C3)Cl)C(=O)C(=O)NC4=CC=NC=C4		TUBB2B
2-[1-[(4-chlorophenyl)methyl]indol-3-yl]-2-oxo-N-pyridin-4-ylacetamide	C1=CC=C2C(=C1)C(=CN2CC3=CC=C(C=C3)Cl)C(=O)C(=O)NC4=CC=NC=C4		TUBB3
2-[1-[(4-chlorophenyl)methyl]indol-3-yl]-2-oxo-N-pyridin-4-ylacetamide	C1=CC=C2C(=C1)C(=CN2CC3=CC=C(C=C3)Cl)C(=O)C(=O)NC4=CC=NC=C4		TUBB4A
2-[1-[(4-chlorophenyl)methyl]indol-3-yl]-2-oxo-N-pyridin-4-ylacetamide	C1=CC=C2C(=C1)C(=CN2CC3=CC=C(C=C3)Cl)C(=O)C(=O)NC4=CC=NC=C4		TUBB6
2-(1H-indol-3-yl)ethanamine	C1=CC=C2C(=C1)C(=CN2)CCN		EGFR
1-N-[2-(1H-indol-3-yl)ethyl]-4-N-pyridin-4-ylbenzene-1,4-diamine	C1=CC=C2C(=C1)C(=CN2)CCNC3=CC=C(C=C3)NC4=CC=NC=C4		MDM2
(E)-N-hydroxy-3-[4-[[2-hydroxyethyl-[2-(1H-indol-3-yl)ethyl]amino]methyl]phenyl]prop-2-enamide	C1=CC=C2C(=C1)C(=CN2)CCN(CCO)CC3=CC=C(C=C3)C=CC(=O)NO		HDAC5
(E)-N-hydroxy-3-[4-[[2-hydroxyethyl-[2-(1H-indol-3-yl)ethyl]amino]methyl]phenyl]prop-2-enamide	C1=CC=C2C(=C1)C(=CN2)CCN(CCO)CC3=CC=C(C=C3)C=CC(=O)NO		HDAC9
(2-amino-4,5,6,7-tetrahydro-1-benzothiophen-3-yl)-(4-chlorophenyl)methanone	C1CCC2=C(C1)C(=C(S2)N)C(=O)C3=CC=C(C=C3)Cl		ADORA1
N-(4-chlorophenyl)-4-(pyridin-4-ylmethyl)phthalazin-1-amine	C1=CC=C2C(=C1)C(=NN=C2NC3=CC=C(C=C3)Cl)CC4=CC=NC=C4		CSF1R
N-(4-chlorophenyl)-4-(pyridin-4-ylmethyl)phthalazin-1-amine	C1=CC=C2C(=C1)C(=NN=C2NC3=CC=C(C=C3)Cl)CC4=CC=NC=C4		FLT1
N-(4-chlorophenyl)-4-(pyridin-4-ylmethyl)phthalazin-1-amine	C1=CC=C2C(=C1)C(=NN=C2NC3=CC=C(C=C3)Cl)CC4=CC=NC=C4		FLT4
N-(4-chlorophenyl)-4-(pyridin-4-ylmethyl)phthalazin-1-amine	C1=CC=C2C(=C1)C(=NN=C2NC3=CC=C(C=C3)Cl)CC4=CC=NC=C4		KDR
N-(4-chlorophenyl)-4-(pyridin-4-ylmethyl)phthalazin-1-amine	C1=CC=C2C(=C1)C(=NN=C2NC3=CC=C(C=C3)Cl)CC4=CC=NC=C4		KIT
N-(4-chlorophenyl)-4-(pyridin-4-ylmethyl)phthalazin-1-amine	C1=CC=C2C(=C1)C(=NN=C2NC3=CC=C(C=C3)Cl)CC4=CC=NC=C4		PDGFRA
N-(4-chlorophenyl)-4-(pyridin-4-ylmethyl)phthalazin-1-amine	C1=CC=C2C(=C1)C(=NN=C2NC3=CC=C(C=C3)Cl)CC4=CC=NC=C4		PDGFRB
1,2-benzoxazol-3-ylmethanesulfonamide	C1=CC=C2C(=C1)C(=NO2)CS(=O)(=O)N		SCN3A
1,2-benzoxazol-3-ylmethanesulfonamide	C1=CC=C2C(=C1)C(=NO2)CS(=O)(=O)N		SCN8A
1,2-benzoxazol-3-ylmethanesulfonamide	C1=CC=C2C(=C1)C(=NO2)CS(=O)(=O)N		SCN9A
N-(3,5-dichloro-1-hydroxypyridin-4-ylidene)-6-(difluoromethoxy)-[1]benzofuro[3,2-c]pyridine-9-carboxamide	C1=CC(=C2C(=C1C(=O)N=C3C(=CN(C=C3Cl)O)Cl)C4=C(O2)C=CN=C4)OC(F)F		PDE4B
N-(3,5-dichloro-1-hydroxypyridin-4-ylidene)-6-(difluoromethoxy)-[1]benzofuro[3,2-c]pyridine-9-carboxamide	C1=CC(=C2C(=C1C(=O)N=C3C(=CN(C=C3Cl)O)Cl)C4=C(O2)C=CN=C4)OC(F)F		PDE4C
N-(3,5-dichloro-1-hydroxypyridin-4-ylidene)-6-(difluoromethoxy)-[1]benzofuro[3,2-c]pyridine-9-carboxamide	C1=CC(=C2C(=C1C(=O)N=C3C(=CN(C=C3Cl)O)Cl)C4=C(O2)C=CN=C4)OC(F)F		PDE4D
(6-oxo-8,9,10,11-tetrahydro-7H-cyclohepta[c]chromen-3-yl) sulfamate	C1CCC2=C(CC1)C(=O)OC3=C2C=CC(=C3)OS(=O)(=O)N		STS
2-(2,3-dihydro-1H-inden-2-ylamino)acetamide	C1C(CC2=CC=CC=C21)NCC(=O)N		GRIN2A
2-(2,3-dihydro-1H-inden-2-ylamino)acetamide	C1C(CC2=CC=CC=C21)NCC(=O)N		GRIN2D
2-(2,3-dihydro-1H-inden-2-ylamino)acetamide	C1C(CC2=CC=CC=C21)NCC(=O)N		MAOA
[(5S,6S,9R)-5-amino-6-(2,3-difluorophenyl)-6,7,8,9-tetrahydro-5H-cyclohepta[b]pyridin-9-yl] 4-(2-oxo-3H-imidazo[4,5-b]pyridin-1-yl)piperidine-1-carboxylate	C1CC(C2=C(C=CC=N2)C(C1C3=C(C(=CC=C3)F)F)N)OC(=O)N4CCC(CC4)N5C6=C(NC5=O)N=CC=C6		CALCRL
(2S)-4-[(3aS,7aR)-1,3,3a,4,5,6,7,7a-octahydroisoindol-2-yl]-2-benzyl-4-oxobutanoic acid	C1CCC2CN(CC2C1)C(=O)CC(CC3=CC=CC=C3)C(=O)O		KCNJ11
2-[(3S,4R)-3-benzyl-4-hydroxy-3,4-dihydro-2H-chromen-7-yl]-4-(trifluoromethyl)benzoic acid	C1C(C(C2=C(O1)C=C(C=C2)C3=C(C=CC(=C3)C(F)(F)F)C(=O)O)O)CC4=CC=CC=C4		LTB4R
3-(4-hydroxyphenyl)-2H-chromen-7-ol	C1C(=CC2=C(O1)C=C(C=C2)O)C3=CC=C(C=C3)O		CASP3
3-(4-hydroxyphenyl)-2H-chromen-7-ol	C1C(=CC2=C(O1)C=C(C=C2)O)C3=CC=C(C=C3)O		CFLAR
2-cyclopentyl-4-(5-phenyl-1H-pyrrolo[2,3-b]pyridin-3-yl)benzoic acid	C1CCC(C1)C2=C(C=CC(=C2)C3=CNC4=C3C=C(C=N4)C5=CC=CC=C5)C(=O)O		SGK2
2-[(3R)-7-[[4-cyclopentyl-3-(trifluoromethyl)phenyl]methoxy]-1,2,3,4-tetrahydrocyclopenta[b]indol-3-yl]acetic acid	C1CCC(C1)C2=C(C=C(C=C2)COC3=CC4=C(C=C3)NC5=C4CCC5CC(=O)O)C(F)(F)F		S1PR1
(2R)-2-cyclopentyl-2-[4-(quinolin-2-ylmethoxy)phenyl]acetic acid	C1CCC(C1)C(C2=CC=C(C=C2)OCC3=NC4=CC=CC=C4C=C3)C(=O)O		ALOX5AP
(3R)-3-cyclopentyl-3-[4-(7H-pyrrolo[2,3-d]pyrimidin-4-yl)pyrazol-1-yl]propanenitrile	C1CCC(C1)C(CC#N)N2C=C(C=N2)C3=C4C=CNC4=NC=N3		JAK1
(3R)-3-cyclopentyl-3-[4-(7H-pyrrolo[2,3-d]pyrimidin-4-yl)pyrazol-1-yl]propanenitrile	C1CCC(C1)C(CC#N)N2C=C(C=N2)C3=C4C=CNC4=NC=N3		JAK2
(2S,3S,4R,5R)-2-[(2-fluorophenyl)sulfanylmethyl]-5-[6-[[(1R,2R)-2-hydroxycyclopentyl]amino]purin-9-yl]oxolane-3,4-diol	C1CC(C(C1)O)NC2=C3C(=NC=N2)N(C=N3)C4C(C(C(O4)CSC5=CC=CC=C5F)O)O		ADORA1
(2E,5E)-2,5-bis(thiophen-2-ylmethylidene)cyclopentan-1-one	C1CC(=CC2=CC=CS2)C(=O)C1=CC3=CC=CS3		PPM1D
2-[3-[5-[6-[3-[3-(carboxymethyl)phenyl]-4-[(2R,3S,4S,5S,6R)-3,4,5-trihydroxy-6-(hydroxymethyl)oxan-2-yl]oxyphenyl]hexyl]-2-[(2R,3S,4S,5S,6R)-3,4,5-trihydroxy-6-(hydroxymethyl)oxan-2-yl]oxyphenyl]phenyl]acetic acid	C1=CC(=CC(=C1)C2=C(C=CC(=C2)CCCCCCC3=CC(=C(C=C3)OC4C(C(C(C(O4)CO)O)O)O)C5=CC=CC(=C5)CC(=O)O)OC6C(C(C(C(O6)CO)O)O)O)CC(=O)O		SELL
5-(2,4-difluorophenyl)-2-hydroxybenzoic acid	C1=CC(=C(C=C1C2=C(C=C(C=C2)F)F)C(=O)O)O		PTGS1
5-(2,4-difluorophenyl)-2-hydroxybenzoic acid	C1=CC(=C(C=C1C2=C(C=C(C=C2)F)F)C(=O)O)O		PTGS2
2-(carbamoylamino)-5-(4-fluorophenyl)thiophene-3-carboxamide	C1=CC(=CC=C1C2=CC(=C(S2)NC(=O)N)C(=O)N)F		IKBKB
2-amino-6-[[2-(4-chlorophenyl)-1,3-thiazol-4-yl]methylsulfanyl]-4-[4-(2-hydroxyethoxy)phenyl]pyridine-3,5-dicarbonitrile	C1=CC(=CC=C1C2=C(C(=NC(=C2C#N)SCC3=CSC(=N3)C4=CC=C(C=C4)Cl)N)C#N)OCCO		ADORA1
2-(3,4-dihydroxyphenyl)-3,5,7-trihydroxychromen-4-one	C1=CC(=C(C=C1C2=C(C(=O)C3=C(C=C(C=C3O2)O)O)O)O)O		PIK3C2B
2-(3,4-dihydroxyphenyl)-3,5,7-trihydroxychromen-4-one	C1=CC(=C(C=C1C2=C(C(=O)C3=C(C=C(C=C3O2)O)O)O)O)O		PIK3CA
2-(3,4-dihydroxyphenyl)-3,5,7-trihydroxychromen-4-one	C1=CC(=C(C=C1C2=C(C(=O)C3=C(C=C(C=C3O2)O)O)O)O)O		PIK3CB
2-(3,4-dihydroxyphenyl)-3,5,7-trihydroxychromen-4-one	C1=CC(=C(C=C1C2=C(C(=O)C3=C(C=C(C=C3O2)O)O)O)O)O		PIK3CD
2-(3,4-dihydroxyphenyl)-3,5,7-trihydroxychromen-4-one	C1=CC(=C(C=C1C2=C(C(=O)C3=C(C=C(C=C3O2)O)O)O)O)O		PIK3CG
2-(3,4-dihydroxyphenyl)-3,5,7-trihydroxychromen-4-one	C1=CC(=C(C=C1C2=C(C(=O)C3=C(C=C(C=C3O2)O)O)O)O)O		PIK3R1
2-(3,4-dihydroxyphenyl)-3,5,7-trihydroxychromen-4-one	C1=CC(=C(C=C1C2=C(C(=O)C3=C(C=C(C=C3O2)O)O)O)O)O		PIK3R3
2-(3,4-dihydroxyphenyl)-3,5,7-trihydroxychromen-4-one	C1=CC(=C(C=C1C2=C(C(=O)C3=C(C=C(C=C3O2)O)O)O)O)O		PKN3
2-(3,4-dihydroxyphenyl)-3,5,7-trihydroxychromen-4-one	C1=CC(=C(C=C1C2=C(C(=O)C3=C(C=C(C=C3O2)O)O)O)O)O		PRKCA
2-(3,4-dihydroxyphenyl)-3,5,7-trihydroxychromen-4-one	C1=CC(=C(C=C1C2=C(C(=O)C3=C(C=C(C=C3O2)O)O)O)O)O		PRKCB
2-(3,4-dihydroxyphenyl)-3,5,7-trihydroxychromen-4-one	C1=CC(=C(C=C1C2=C(C(=O)C3=C(C=C(C=C3O2)O)O)O)O)O		PRKCD
2-(3,4-dihydroxyphenyl)-3,5,7-trihydroxychromen-4-one	C1=CC(=C(C=C1C2=C(C(=O)C3=C(C=C(C=C3O2)O)O)O)O)O		PRKCE
2-(3,4-dihydroxyphenyl)-3,5,7-trihydroxychromen-4-one	C1=CC(=C(C=C1C2=C(C(=O)C3=C(C=C(C=C3O2)O)O)O)O)O		PRKCH
2-(3,4-dihydroxyphenyl)-3,5,7-trihydroxychromen-4-one	C1=CC(=C(C=C1C2=C(C(=O)C3=C(C=C(C=C3O2)O)O)O)O)O		PRKCQ
2-(3,4-dihydroxyphenyl)-3,5,7-trihydroxychromen-4-one	C1=CC(=C(C=C1C2=C(C(=O)C3=C(C=C(C=C3O2)O)O)O)O)O		PRKCZ
2-(3,4-dihydroxyphenyl)-3,5,7-trihydroxychromen-4-one	C1=CC(=C(C=C1C2=C(C(=O)C3=C(C=C(C=C3O2)O)O)O)O)O		PRKD1
2-(3,4-dihydroxyphenyl)-3,5,7-trihydroxychromen-4-one	C1=CC(=C(C=C1C2=C(C(=O)C3=C(C=C(C=C3O2)O)O)O)O)O		PRKD3
N-[4-(2-amino-3-chloropyridin-4-yl)oxy-3-fluorophenyl]-5-(4-fluorophenyl)-4-oxo-1H-pyridine-3-carboxamide	C1=CC(=CC=C1C2=CNC=C(C2=O)C(=O)NC3=CC(=C(C=C3)OC4=C(C(=NC=C4)N)Cl)F)F		KDR
N-[4-(2-amino-3-chloropyridin-4-yl)oxy-3-fluorophenyl]-5-(4-fluorophenyl)-4-oxo-1H-pyridine-3-carboxamide	C1=CC(=CC=C1C2=CNC=C(C2=O)C(=O)NC3=CC(=C(C=C3)OC4=C(C(=NC=C4)N)Cl)F)F		MET
5-(4-bromophenyl)-4-[2-(5-bromopyrimidin-2-yl)oxyethoxy]-6-(sulfamoylamino)pyrimidine	C1=CC(=CC=C1C2=C(N=CN=C2OCCOC3=NC=C(C=N3)Br)NS(=O)(=O)N)Br		EDNRA
5-(4-bromophenyl)-4-[2-(5-bromopyrimidin-2-yl)oxyethoxy]-6-(sulfamoylamino)pyrimidine	C1=CC(=CC=C1C2=C(N=CN=C2OCCOC3=NC=C(C=N3)Br)NS(=O)(=O)N)Br		EDNRB
(1S)-2-amino-1-(4-chlorophenyl)-1-[4-(1H-pyrazol-4-yl)phenyl]ethanol	C1=CC(=CC=C1C2=CNN=C2)C(CN)(C3=CC=C(C=C3)Cl)O		AKT1
3-(4,5-diphenyl-1,3-oxazol-2-yl)propanoic acid	C1=CC=C(C=C1)C2=C(OC(=N2)CCC(=O)O)C3=CC=CC=C3		PTGS1
3-(4,5-diphenyl-1,3-oxazol-2-yl)propanoic acid	C1=CC=C(C=C1)C2=C(OC(=N2)CCC(=O)O)C3=CC=CC=C3		PTGS2
5-[2-[7-(trifluoromethyl)-5-[4-(trifluoromethyl)phenyl]pyrazolo[1,5-a]pyrimidin-3-yl]ethynyl]pyridin-2-amine	C1=CC(=CC=C1C2=NC3=C(C=NN3C(=C2)C(F)(F)F)C#CC4=CN=C(C=C4)N)C(F)(F)F		GRM3
6-phenylpteridine-2,4,7-triamine	C1=CC=C(C=C1)C2=NC3=C(N=C(N=C3N=C2N)N)N		SCNN1A
6-phenylpteridine-2,4,7-triamine	C1=CC=C(C=C1)C2=NC3=C(N=C(N=C3N=C2N)N)N		SCNN1B
3-(2,3,5-trichlorophenyl)pyrazine-2,6-diamine	C1=C(C=C(C(=C1C2=NC=C(N=C2N)N)Cl)Cl)Cl		CACNA1A
3-(2,3,5-trichlorophenyl)pyrazine-2,6-diamine	C1=C(C=C(C(=C1C2=NC=C(N=C2N)N)Cl)Cl)Cl		CACNA1C
3-(2,3,5-trichlorophenyl)pyrazine-2,6-diamine	C1=C(C=C(C(=C1C2=NC=C(N=C2N)N)Cl)Cl)Cl		CACNA1D
3-(2,3,5-trichlorophenyl)pyrazine-2,6-diamine	C1=C(C=C(C(=C1C2=NC=C(N=C2N)N)Cl)Cl)Cl		SCN3A
7-chloro-3-hydroxy-5-phenyl-1,3-dihydro-1,4-benzodiazepin-2-one	C1=CC=C(C=C1)C2=NC(C(=O)NC3=C2C=C(C=C3)Cl)O		GABRA2
7-chloro-3-hydroxy-5-phenyl-1,3-dihydro-1,4-benzodiazepin-2-one	C1=CC=C(C=C1)C2=NC(C(=O)NC3=C2C=C(C=C3)Cl)O		GABRA3
7-chloro-3-hydroxy-5-phenyl-1,3-dihydro-1,4-benzodiazepin-2-one	C1=CC=C(C=C1)C2=NC(C(=O)NC3=C2C=C(C=C3)Cl)O		GABRB3
7-chloro-3-hydroxy-5-phenyl-1,3-dihydro-1,4-benzodiazepin-2-one	C1=CC=C(C=C1)C2=NC(C(=O)NC3=C2C=C(C=C3)Cl)O		GABRE
7-chloro-3-hydroxy-5-phenyl-1,3-dihydro-1,4-benzodiazepin-2-one	C1=CC=C(C=C1)C2=NC(C(=O)NC3=C2C=C(C=C3)Cl)O		GABRP
7-chloro-5-(2-chlorophenyl)-3-hydroxy-1,3-dihydro-1,4-benzodiazepin-2-one	C1=CC=C(C(=C1)C2=NC(C(=O)NC3=C2C=C(C=C3)Cl)O)Cl		GABRA2
7-chloro-5-(2-chlorophenyl)-3-hydroxy-1,3-dihydro-1,4-benzodiazepin-2-one	C1=CC=C(C(=C1)C2=NC(C(=O)NC3=C2C=C(C=C3)Cl)O)Cl		GABRA3
7-chloro-5-(2-chlorophenyl)-3-hydroxy-1,3-dihydro-1,4-benzodiazepin-2-one	C1=CC=C(C(=C1)C2=NC(C(=O)NC3=C2C=C(C=C3)Cl)O)Cl		GABRB3
7-chloro-5-(2-chlorophenyl)-3-hydroxy-1,3-dihydro-1,4-benzodiazepin-2-one	C1=CC=C(C(=C1)C2=NC(C(=O)NC3=C2C=C(C=C3)Cl)O)Cl		GABRE
7-chloro-5-(2-chlorophenyl)-3-hydroxy-1,3-dihydro-1,4-benzodiazepin-2-one	C1=CC=C(C(=C1)C2=NC(C(=O)NC3=C2C=C(C=C3)Cl)O)Cl		GABRP
3-[5-(2-fluorophenyl)-1,2,4-oxadiazol-3-yl]benzoic acid	C1=CC=C(C(=C1)C2=NC(=NO2)C3=CC(=CC=C3)C(=O)O)F		RPL10
3-[5-(2-fluorophenyl)-1,2,4-oxadiazol-3-yl]benzoic acid	C1=CC=C(C(=C1)C2=NC(=NO2)C3=CC(=CC=C3)C(=O)O)F		RPL22
3-[5-(2-fluorophenyl)-1,2,4-oxadiazol-3-yl]benzoic acid	C1=CC=C(C(=C1)C2=NC(=NO2)C3=CC(=CC=C3)C(=O)O)F		RPL5
3-[5-(2-fluorophenyl)-1,2,4-oxadiazol-3-yl]benzoic acid	C1=CC=C(C(=C1)C2=NC(=NO2)C3=CC(=CC=C3)C(=O)O)F		RPS4Y1
5-(2-phenylpyrazolo[1,5-a]pyridin-3-yl)-2H-pyrazolo[3,4-c]pyridazin-3-amine	C1=CC=C(C=C1)C2=NN3C=CC=CC3=C2C4=CC5=C(NN=C5N=N4)N		MAPK1
4-(2H-tetrazol-5-yl)-N-[4-(2H-tetrazol-5-yl)phenyl]benzamide	C1=CC(=CC=C1C2=NNN=N2)C(=O)NC3=CC=C(C=C3)C4=NNN=N4		KCNMA1
2,2-bis(4-fluorophenyl)-2-phenylacetamide	C1=CC=C(C=C1)C(C2=CC=C(C=C2)F)(C3=CC=C(C=C3)F)C(=O)N		KCNN4
4-[3-[1-benzhydryl-5-chloro-2-[2-[[2-(trifluoromethyl)phenyl]methylsulfonylamino]ethyl]indol-3-yl]propyl]benzoic acid	C1=CC=C(C=C1)C(C2=CC=CC=C2)N3C4=C(C=C(C=C4)Cl)C(=C3CCNS(=O)(=O)CC5=CC=CC=C5C(F)(F)F)CCCC6=CC=C(C=C6)C(=O)O		PLA2G4A
2-[4-[(Z)-4-chloro-1,2-diphenylbut-1-enyl]phenoxy]ethanol	C1=CC=C(C=C1)C(=C(C2=CC=CC=C2)C3=CC=C(C=C3)OCCO)CCCl		ESR1
2-[2-[4-[(Z)-4-chloro-1,2-diphenylbut-1-enyl]phenoxy]ethoxy]ethanol	C1=CC=C(C=C1)C(=C(C2=CC=CC=C2)C3=CC=C(C=C3)OCCOCCO)CCCl		ESR1
4-[[4-carboxybutyl-[2-[2-[[4-(2-phenylethyl)phenyl]methoxy]phenyl]ethyl]amino]methyl]benzoic acid	C1=CC=C(C=C1)CCC2=CC=C(C=C2)COC3=CC=CC=C3CCN(CCCCC(=O)O)CC4=CC=C(C=C4)C(=O)O		GUCY1A1
4-[[4-carboxybutyl-[2-[2-[[4-(2-phenylethyl)phenyl]methoxy]phenyl]ethyl]amino]methyl]benzoic acid	C1=CC=C(C=C1)CCC2=CC=C(C=C2)COC3=CC=CC=C3CCN(CCCCC(=O)O)CC4=CC=C(C=C4)C(=O)O		GUCY1B1
(1S)-1-phenyl-2-pyridin-2-ylethanamine	C1=CC=C(C=C1)C(CC2=CC=CC=N2)N		GRIN2A
(1S)-1-phenyl-2-pyridin-2-ylethanamine	C1=CC=C(C=C1)C(CC2=CC=CC=N2)N		GRIN2D
(2S)-2-[[4-[2-(2-amino-4-oxo-3,7-dihydropyrrolo[2,3-d]pyrimidin-5-yl)ethyl]benzoyl]amino]pentanedioic acid	C1=CC(=CC=C1CCC2=CNC3=C2C(=O)NC(=N3)N)C(=O)NC(CCC(=O)O)C(=O)O		TYMS
(Z)-7-[(2R,3R,5R)-5-chloro-2-[(E,3S)-3-cyclohexyl-3-hydroxyprop-1-enyl]-3-hydroxycyclopentyl]hept-5-enoic acid	C1CCC(CC1)C(C=CC2C(CC(C2CC=CCCCC(=O)O)Cl)O)O		EGFR
2-[4-phenyl-1-[4-(quinolin-2-ylmethoxy)phenyl]butyl]sulfanylacetic acid	C1=CC=C(C=C1)CCCC(C2=CC=C(C=C2)OCC3=NC4=CC=CC=C4C=C3)SCC(=O)O		EGFR
4-[[4-[4-(triazol-1-yl)butyl]phenoxy]methyl]-2-[(E)-2-[4-(trifluoromethyl)phenyl]ethenyl]-1,3-oxazole	C1=CC(=CC=C1CCCCN2C=CN=N2)OCC3=COC(=N3)C=CC4=CC=C(C=C4)C(F)(F)F		ERBB2
4-phenylbutanoic acid	C1=CC=C(C=C1)CCCC(=O)O		HDAC5
4-phenylbutanoic acid	C1=CC=C(C=C1)CCCC(=O)O		HDAC9
4-[4-(4-fluorophenyl)-1-(3-phenylpropyl)-5-pyridin-4-ylimidazol-2-yl]but-3-yn-1-ol	C1=CC=C(C=C1)CCCN2C(=NC(=C2C3=CC=NC=C3)C4=CC=C(C=C4)F)C#CCCO		MAPK11
(2S)-2-amino-6-[[4-[2-[bis(carboxymethyl)amino]-3-[2-[bis(carboxymethyl)amino]ethyl-(carboxymethyl)amino]propyl]phenyl]carbamothioylamino]hexanoic acid	C1=CC(=CC=C1CC(CN(CCN(CC(=O)O)CC(=O)O)CC(=O)O)N(CC(=O)O)CC(=O)O)NC(=S)NCCCCC(C(=O)O)N		MUC1
3-phenyl-3-[4-(trifluoromethyl)phenoxy]propan-1-amine	C1=CC=C(C=C1)C(CCN)OC2=CC=C(C=C2)C(F)(F)F		CALCA
3-[4-(4-chlorophenyl)sulfonyl-4-(2,5-difluorophenyl)cyclohexyl]propanoic acid	C1CC(CCC1CCC(=O)O)(C2=C(C=CC(=C2)F)F)S(=O)(=O)C3=CC=C(C=C3)Cl		APH1B
4-amino-3-(4-chlorophenyl)butanoic acid	C1=CC(=CC=C1C(CC(=O)O)CN)Cl		GABBR1
(2S)-2-amino-3-(4-hydroxyphenyl)propanoic acid	C1=CC(=CC=C1CC(C(=O)O)N)O		HLA-DRB1
(2S,3R)-2-amino-3-(3,4-dihydroxyphenyl)-3-hydroxypropanoic acid	C1=CC(=C(C=C1C(C(C(=O)O)N)O)O)O		ADRA1B
(2S,3R)-2-amino-3-(3,4-dihydroxyphenyl)-3-hydroxypropanoic acid	C1=CC(=C(C=C1C(C(C(=O)O)N)O)O)O		ADRA2C
(2S,3R)-2-amino-3-(3,4-dihydroxyphenyl)-3-hydroxypropanoic acid	C1=CC(=C(C=C1C(C(C(=O)O)N)O)O)O		ADRB2
[(1R)-1-(2-chlorophenyl)-2-(tetrazol-2-yl)ethyl] carbamate	C1=CC=C(C(=C1)C(CN2N=CN=N2)OC(=O)N)Cl		GABRA2
[(1R)-1-(2-chlorophenyl)-2-(tetrazol-2-yl)ethyl] carbamate	C1=CC=C(C(=C1)C(CN2N=CN=N2)OC(=O)N)Cl		GABRA3
[(1R)-1-(2-chlorophenyl)-2-(tetrazol-2-yl)ethyl] carbamate	C1=CC=C(C(=C1)C(CN2N=CN=N2)OC(=O)N)Cl		GABRB3
[(1R)-1-(2-chlorophenyl)-2-(tetrazol-2-yl)ethyl] carbamate	C1=CC=C(C(=C1)C(CN2N=CN=N2)OC(=O)N)Cl		GABRE
[(1R)-1-(2-chlorophenyl)-2-(tetrazol-2-yl)ethyl] carbamate	C1=CC=C(C(=C1)C(CN2N=CN=N2)OC(=O)N)Cl		GABRP
[(1R)-1-(2-chlorophenyl)-2-(tetrazol-2-yl)ethyl] carbamate	C1=CC=C(C(=C1)C(CN2N=CN=N2)OC(=O)N)Cl		SCN3A
[(1R)-1-(2-chlorophenyl)-2-(tetrazol-2-yl)ethyl] carbamate	C1=CC=C(C(=C1)C(CN2N=CN=N2)OC(=O)N)Cl		SCN8A
[(1R)-1-(2-chlorophenyl)-2-(tetrazol-2-yl)ethyl] carbamate	C1=CC=C(C(=C1)C(CN2N=CN=N2)OC(=O)N)Cl		SCN9A
N-[2-hydroxy-5-[(1R)-1-hydroxy-2-[2-[4-[[(2R)-2-hydroxy-2-phenylethyl]amino]phenyl]ethylamino]ethyl]phenyl]formamide	C1=CC=C(C=C1)C(CNC2=CC=C(C=C2)CCNCC(C3=CC(=C(C=C3)O)NC=O)O)O		ADRB2
(2R,3R,4S,5R)-2-[6-amino-2-[2-(4-chlorophenyl)ethoxy]purin-9-yl]-5-(hydroxymethyl)oxolane-3,4-diol	C1=CC(=CC=C1CCOC2=NC(=C3C(=N2)N(C=N3)C4C(C(C(O4)CO)O)O)N)Cl		ADORA2A
5-[(1R)-2-[6-(2,2-difluoro-2-phenylethoxy)hexylamino]-1-hydroxyethyl]-8-hydroxy-1H-quinolin-2-one	C1=CC=C(C=C1)C(COCCCCCCNCC(C2=C3C=CC(=O)NC3=C(C=C2)O)O)(F)F		ADRB2
(3-carbamoyloxy-2-phenylpropyl) carbamate	C1=CC=C(C=C1)C(COC(=O)N)COC(=O)N		GRIN2A
(3-carbamoyloxy-2-phenylpropyl) carbamate	C1=CC=C(C=C1)C(COC(=O)N)COC(=O)N		GRIN2D
2-phenyl-N-[5-[2-[2-[5-[(2-phenylacetyl)amino]-1,3,4-thiadiazol-2-yl]ethylsulfanyl]ethyl]-1,3,4-thiadiazol-2-yl]acetamide	C1=CC=C(C=C1)CC(=O)NC2=NN=C(S2)CCSCCC3=NN=C(S3)NC(=O)CC4=CC=CC=C4		GLS
N-carbamoyl-2-phenylacetamide	C1=CC=C(C=C1)CC(=O)NC(=O)N		SCN3A
N-carbamoyl-2-phenylacetamide	C1=CC=C(C=C1)CC(=O)NC(=O)N		SCN8A
N-carbamoyl-2-phenylacetamide	C1=CC=C(C=C1)CC(=O)NC(=O)N		SCN9A
2-[2-[2-(2,6-dichloroanilino)phenyl]acetyl]oxyacetic acid	C1=CC=C(C(=C1)CC(=O)OCC(=O)O)NC2=C(C=CC=C2Cl)Cl		PTGS2
2-[1-(aminomethyl)cyclohexyl]acetic acid	C1CCC(CC1)(CC(=O)O)CN		CACNA1A
2-[1-(aminomethyl)cyclohexyl]acetic acid	C1CCC(CC1)(CC(=O)O)CN		CACNA1C
2-[1-(aminomethyl)cyclohexyl]acetic acid	C1CCC(CC1)(CC(=O)O)CN		CACNA1D
2-[1-(aminomethyl)cyclohexyl]acetic acid	C1CCC(CC1)(CC(=O)O)CN		CACNA1H
2-[1-(aminomethyl)cyclohexyl]acetic acid	C1CCC(CC1)(CC(=O)O)CN		CACNA2D1
2-[1-(aminomethyl)cyclohexyl]acetic acid	C1CCC(CC1)(CC(=O)O)CN		CACNA2D2
2-[1-(aminomethyl)cyclohexyl]acetic acid	C1CCC(CC1)(CC(=O)O)CN		CACNA2D3
2-[1-(aminomethyl)cyclohexyl]acetic acid	C1CCC(CC1)(CC(=O)O)CN		CACNA2D4
2-[1-(aminomethyl)cyclohexyl]acetic acid	C1CCC(CC1)(CC(=O)O)CN		CACNB3
2-[1-(aminomethyl)cyclohexyl]acetic acid	C1CCC(CC1)(CC(=O)O)CN		CACNG4
2-[1-(aminomethyl)cyclohexyl]acetic acid	C1CCC(CC1)(CC(=O)O)CN		CACNG6
2-[1-(aminomethyl)cyclohexyl]acetic acid	C1CCC(CC1)(CC(=O)O)CN		CACNG7
2-[2-(2,4-dichlorophenoxy)phenyl]acetic acid	C1=CC=C(C(=C1)CC(=O)O)OC2=C(C=C(C=C2)Cl)Cl		PTGS1
2-[2-(2,4-dichlorophenoxy)phenyl]acetic acid	C1=CC=C(C(=C1)CC(=O)O)OC2=C(C=C(C=C2)Cl)Cl		PTGS2
2-[[5-(3-chlorophenyl)-3-hydroxypyridine-2-carbonyl]amino]acetic acid	C1=CC(=CC(=C1)Cl)C2=CC(=C(N=C2)C(=O)NCC(=O)O)O		EGLN3
4-[2-(5-amino-1H-pyrazol-4-yl)-4-chlorophenoxy]-5-chloro-2-fluoro-N-(1,3-thiazol-4-yl)benzenesulfonamide	C1=CC(=C(C=C1Cl)C2=C(NN=C2)N)OC3=CC(=C(C=C3Cl)S(=O)(=O)NC4=CSC=N4)F		SCN9A
2-[4-[[2-(3-chlorophenyl)-6-(trifluoromethyl)pyridin-4-yl]methyl]phenyl]acetic acid	C1=CC(=CC(=C1)Cl)C2=NC(=CC(=C2)CC3=CC=C(C=C3)CC(=O)O)C(F)(F)F		PDE4D
6-(2,3-dichlorophenyl)-1,2,4-triazine-3,5-diamine	C1=CC(=C(C(=C1)Cl)Cl)C2=C(N=C(N=N2)N)N		SCN3A
6-(2,3-dichlorophenyl)-1,2,4-triazine-3,5-diamine	C1=CC(=C(C(=C1)Cl)Cl)C2=C(N=C(N=N2)N)N		SCN8A
6-(2,3-dichlorophenyl)-1,2,4-triazine-3,5-diamine	C1=CC(=C(C(=C1)Cl)Cl)C2=C(N=C(N=N2)N)N		SCN9A
(2,4-dichlorophenyl)methanol	C1=CC(=C(C=C1Cl)Cl)CO		SCN3A
(2,4-dichlorophenyl)methanol	C1=CC(=C(C=C1Cl)Cl)CO		SCN8A
(2,4-dichlorophenyl)methanol	C1=CC(=C(C=C1Cl)Cl)CO		SCN9A
N-[3,5-bis(trifluoromethyl)phenyl]-5-chloro-2-hydroxybenzamide	C1=CC(=C(C=C1Cl)C(=O)NC2=CC(=CC(=C2)C(F)(F)F)C(F)(F)F)O		IKBKB
3-[[4-[2-(3-chloroanilino)pyrimidin-4-yl]pyridin-2-yl]amino]propan-1-ol	C1=CC(=CC(=C1)Cl)NC2=NC=CC(=N2)C3=CC(=NC=C3)NCCCO		PRRT2
2-(3-chlorophenyl)-1-(diaminomethylidene)guanidine	C1=CC(=CC(=C1)Cl)N=C(N)N=C(N)N		PPARG
(2S)-2-amino-4-(2-amino-4-chlorophenyl)-4-oxobutanoic acid	C1=CC(=C(C=C1Cl)N)C(=O)CC(C(=O)O)N		GRIN2A
(2S)-2-amino-4-(2-amino-4-chlorophenyl)-4-oxobutanoic acid	C1=CC(=C(C=C1Cl)N)C(=O)CC(C(=O)O)N		GRIN2D
2-(1-benzylindazol-3-yl)oxyacetic acid	C1=CC=C(C=C1)CN2C3=CC=CC=C3C(=N2)OCC(=O)O		XDH
1,1,1,3,3,3-hexafluoro-2-[[[5-fluoro-2-[1-[(2-fluorophenyl)methyl]-5-(1,2-oxazol-3-yl)pyrazol-3-yl]pyrimidin-4-yl]amino]methyl]propan-2-ol	C1=CC=C(C(=C1)CN2C(=CC(=N2)C3=NC=C(C(=N3)NCC(C(F)(F)F)(C(F)(F)F)O)F)C4=NOC=C4)F		GUCY1A1
1,1,1,3,3,3-hexafluoro-2-[[[5-fluoro-2-[1-[(2-fluorophenyl)methyl]-5-(1,2-oxazol-3-yl)pyrazol-3-yl]pyrimidin-4-yl]amino]methyl]propan-2-ol	C1=CC=C(C(=C1)CN2C(=CC(=N2)C3=NC=C(C(=N3)NCC(C(F)(F)F)(C(F)(F)F)O)F)C4=NOC=C4)F		GUCY1B1
(2R)-3,3,3-trifluoro-2-[[[5-fluoro-2-[1-[(2-fluorophenyl)methyl]-5-(1,2-oxazol-3-yl)pyrazol-3-yl]pyrimidin-4-yl]amino]methyl]-2-hydroxypropanamide	C1=CC=C(C(=C1)CN2C(=CC(=N2)C3=NC=C(C(=N3)NCC(C(=O)N)(C(F)(F)F)O)F)C4=NOC=C4)F		GUCY1A1
(2R)-3,3,3-trifluoro-2-[[[5-fluoro-2-[1-[(2-fluorophenyl)methyl]-5-(1,2-oxazol-3-yl)pyrazol-3-yl]pyrimidin-4-yl]amino]methyl]-2-hydroxypropanamide	C1=CC=C(C(=C1)CN2C(=CC(=N2)C3=NC=C(C(=N3)NCC(C(=O)N)(C(F)(F)F)O)F)C4=NOC=C4)F		GUCY1B1
(E)-3-[4-(imidazol-1-ylmethyl)phenyl]prop-2-enoic acid	C1=CC(=CC=C1CN2C=CN=C2)C=CC(=O)O		TBXAS1
(2E,4E)-N-benzyl-2-cyano-5-(3,4-dihydroxyphenyl)penta-2,4-dienamide	C1=CC=C(C=C1)CNC(=O)C(=CC=CC2=CC(=C(C=C2)O)O)C#N		JAK2
N-benzyl-3-[2-(pyridine-4-carbonyl)hydrazinyl]propanamide	C1=CC=C(C=C1)CNC(=O)CCNNC(=O)C2=CC=NC=C2		MAOA
N-benzyl-3-[2-(pyridine-4-carbonyl)hydrazinyl]propanamide	C1=CC=C(C=C1)CNC(=O)CCNNC(=O)C2=CC=NC=C2		MAOB
(2R,3R,4S,5R)-2-[6-amino-2-[(2E)-2-(cyclohexylmethylidene)hydrazinyl]purin-9-yl]-5-(hydroxymethyl)oxolane-3,4-diol	C1CCC(CC1)C=NNC2=NC(=C3C(=N2)N(C=N3)C4C(C(C(O4)CO)O)O)N		ADORA2A
2-amino-3-hydroxy-N'-[(2,3,4-trihydroxyphenyl)methyl]propanehydrazide	C1=CC(=C(C(=C1CNNC(=O)C(CO)N)O)O)O		DDC
5-[[6-[(2-fluorophenyl)methoxy]naphthalen-2-yl]methyl]-1,3-thiazolidine-2,4-dione	C1=CC=C(C(=C1)COC2=CC3=C(C=C2)C=C(C=C3)CC4C(=O)NC(=O)S4)F		PPARG
2-(2-amino-3-benzoylphenyl)acetamide	C1=CC=C(C=C1)C(=O)C2=CC=CC(=C2N)CC(=O)N		PTGS1
2-(2-amino-3-benzoylphenyl)acetamide	C1=CC=C(C=C1)C(=O)C2=CC=CC(=C2N)CC(=O)N		PTGS2
4-phenylmethoxyphenol	C1=CC=C(C=C1)COC2=CC=C(C=C2)O		TYR
2-amino-2-[2-[2-chloro-4-(3-phenylmethoxyphenyl)sulfanylphenyl]ethyl]propane-1,3-diol	C1=CC=C(C=C1)COC2=CC(=CC=C2)SC3=CC(=C(C=C3)CCC(CO)(CO)N)Cl		S1PR1
3-[6-[4-(trifluoromethoxy)anilino]pyrimidin-4-yl]benzamide	C1=CC(=CC(=C1)C(=O)N)C2=CC(=NC=N2)NC3=CC=C(C=C3)OC(F)(F)F		ABL1
2,3-dihydroxypropyl 2-[(7-chloroquinolin-4-yl)amino]benzoate	C1=CC=C(C(=C1)C(=O)OCC(CO)O)NC2=C3C=CC(=CC3=NC=C2)Cl		PTGS1
2,3-dihydroxypropyl 2-[(7-chloroquinolin-4-yl)amino]benzoate	C1=CC=C(C(=C1)C(=O)OCC(CO)O)NC2=C3C=CC(=CC3=NC=C2)Cl		PTGS2
(1S,2S,3R,4S,5S)-5-(1,3-dihydroxypropan-2-ylamino)-1-(hydroxymethyl)cyclohexane-1,2,3,4-tetrol	C1C(C(C(C(C1(CO)O)O)O)O)NC(CO)CO		GAA
4-[(E)-2-[(4-chlorophenyl)methylsulfonyl]ethenyl]benzoic acid	C1=CC(=CC=C1CS(=O)(=O)C=CC2=CC=C(C=C2)C(=O)O)Cl		PIK3CA
4-[(E)-2-[(4-chlorophenyl)methylsulfonyl]ethenyl]benzoic acid	C1=CC(=CC=C1CS(=O)(=O)C=CC2=CC=C(C=C2)C(=O)O)Cl		PIK3CB
4-[(E)-2-[(4-chlorophenyl)methylsulfonyl]ethenyl]benzoic acid	C1=CC(=CC=C1CS(=O)(=O)C=CC2=CC=C(C=C2)C(=O)O)Cl		PIK3CD
4-[(E)-2-[(4-chlorophenyl)methylsulfonyl]ethenyl]benzoic acid	C1=CC(=CC=C1CS(=O)(=O)C=CC2=CC=C(C=C2)C(=O)O)Cl		PIK3CG
4-[(E)-2-[(4-chlorophenyl)methylsulfonyl]ethenyl]benzoic acid	C1=CC(=CC=C1CS(=O)(=O)C=CC2=CC=C(C=C2)C(=O)O)Cl		PIK3R1
4-[(E)-2-[(4-chlorophenyl)methylsulfonyl]ethenyl]benzoic acid	C1=CC(=CC=C1CS(=O)(=O)C=CC2=CC=C(C=C2)C(=O)O)Cl		PIK3R3
(2S,3R,4S,5R,6R)-4-[4-(3-fluorophenyl)triazol-1-yl]-2-[(2S,3R,4S,5R,6R)-4-[4-(3-fluorophenyl)triazol-1-yl]-3,5-dihydroxy-6-(hydroxymethyl)oxan-2-yl]sulfanyl-6-(hydroxymethyl)oxane-3,5-diol	C1=CC(=CC(=C1)F)C2=CN(N=N2)C3C(C(OC(C3O)SC4C(C(C(C(O4)CO)O)N5C=C(N=N5)C6=CC(=CC=C6)F)O)CO)O		LGALS3
1-[(2,6-difluorophenyl)methyl]triazole-4-carboxamide	C1=CC(=C(C(=C1)F)CN2C=C(N=N2)C(=O)N)F		SCN3A
1-[(2,6-difluorophenyl)methyl]triazole-4-carboxamide	C1=CC(=C(C(=C1)F)CN2C=C(N=N2)C(=O)N)F		SCN8A
1-[(2,6-difluorophenyl)methyl]triazole-4-carboxamide	C1=CC(=C(C(=C1)F)CN2C=C(N=N2)C(=O)N)F		SCN9A
6-(N-carbamoyl-2,6-difluoroanilino)-2-(2,4-difluorophenyl)pyridine-3-carboxamide	C1=CC(=C(C(=C1)F)N(C2=NC(=C(C=C2)C(=O)N)C3=C(C=C(C=C3)F)F)C(=O)N)F		MAPK1
1-[4-[4-amino-7-[1-(2-hydroxyethyl)pyrazol-4-yl]thieno[3,2-c]pyridin-3-yl]phenyl]-3-(3-fluorophenyl)urea	C1=CC(=CC(=C1)F)NC(=O)NC2=CC=C(C=C2)C3=CSC4=C3C(=NC=C4C5=CN(N=C5)CCO)N		BLK
1-[4-[4-amino-7-[1-(2-hydroxyethyl)pyrazol-4-yl]thieno[3,2-c]pyridin-3-yl]phenyl]-3-(3-fluorophenyl)urea	C1=CC(=CC(=C1)F)NC(=O)NC2=CC=C(C=C2)C3=CSC4=C3C(=NC=C4C5=CN(N=C5)CCO)N		FGR
1-[4-[4-amino-7-[1-(2-hydroxyethyl)pyrazol-4-yl]thieno[3,2-c]pyridin-3-yl]phenyl]-3-(3-fluorophenyl)urea	C1=CC(=CC(=C1)F)NC(=O)NC2=CC=C(C=C2)C3=CSC4=C3C(=NC=C4C5=CN(N=C5)CCO)N		FLT1
1-[4-[4-amino-7-[1-(2-hydroxyethyl)pyrazol-4-yl]thieno[3,2-c]pyridin-3-yl]phenyl]-3-(3-fluorophenyl)urea	C1=CC(=CC(=C1)F)NC(=O)NC2=CC=C(C=C2)C3=CSC4=C3C(=NC=C4C5=CN(N=C5)CCO)N		FLT4
1-[4-[4-amino-7-[1-(2-hydroxyethyl)pyrazol-4-yl]thieno[3,2-c]pyridin-3-yl]phenyl]-3-(3-fluorophenyl)urea	C1=CC(=CC(=C1)F)NC(=O)NC2=CC=C(C=C2)C3=CSC4=C3C(=NC=C4C5=CN(N=C5)CCO)N		FYN
1-[4-[4-amino-7-[1-(2-hydroxyethyl)pyrazol-4-yl]thieno[3,2-c]pyridin-3-yl]phenyl]-3-(3-fluorophenyl)urea	C1=CC(=CC(=C1)F)NC(=O)NC2=CC=C(C=C2)C3=CSC4=C3C(=NC=C4C5=CN(N=C5)CCO)N		HCK
1-[4-[4-amino-7-[1-(2-hydroxyethyl)pyrazol-4-yl]thieno[3,2-c]pyridin-3-yl]phenyl]-3-(3-fluorophenyl)urea	C1=CC(=CC(=C1)F)NC(=O)NC2=CC=C(C=C2)C3=CSC4=C3C(=NC=C4C5=CN(N=C5)CCO)N		KDR
1-[4-[4-amino-7-[1-(2-hydroxyethyl)pyrazol-4-yl]thieno[3,2-c]pyridin-3-yl]phenyl]-3-(3-fluorophenyl)urea	C1=CC(=CC(=C1)F)NC(=O)NC2=CC=C(C=C2)C3=CSC4=C3C(=NC=C4C5=CN(N=C5)CCO)N		LCK
1-[4-[4-amino-7-[1-(2-hydroxyethyl)pyrazol-4-yl]thieno[3,2-c]pyridin-3-yl]phenyl]-3-(3-fluorophenyl)urea	C1=CC(=CC(=C1)F)NC(=O)NC2=CC=C(C=C2)C3=CSC4=C3C(=NC=C4C5=CN(N=C5)CCO)N		LYN
1-[4-[4-amino-7-[1-(2-hydroxyethyl)pyrazol-4-yl]thieno[3,2-c]pyridin-3-yl]phenyl]-3-(3-fluorophenyl)urea	C1=CC(=CC(=C1)F)NC(=O)NC2=CC=C(C=C2)C3=CSC4=C3C(=NC=C4C5=CN(N=C5)CCO)N		PDGFRA
1-[4-[4-amino-7-[1-(2-hydroxyethyl)pyrazol-4-yl]thieno[3,2-c]pyridin-3-yl]phenyl]-3-(3-fluorophenyl)urea	C1=CC(=CC(=C1)F)NC(=O)NC2=CC=C(C=C2)C3=CSC4=C3C(=NC=C4C5=CN(N=C5)CCO)N		PDGFRB
1-[4-[4-amino-7-[1-(2-hydroxyethyl)pyrazol-4-yl]thieno[3,2-c]pyridin-3-yl]phenyl]-3-(3-fluorophenyl)urea	C1=CC(=CC(=C1)F)NC(=O)NC2=CC=C(C=C2)C3=CSC4=C3C(=NC=C4C5=CN(N=C5)CCO)N		SRC
1-[4-[4-amino-7-[1-(2-hydroxyethyl)pyrazol-4-yl]thieno[3,2-c]pyridin-3-yl]phenyl]-3-(3-fluorophenyl)urea	C1=CC(=CC(=C1)F)NC(=O)NC2=CC=C(C=C2)C3=CSC4=C3C(=NC=C4C5=CN(N=C5)CCO)N		YES1
5-(2-fluoro-4-iodoanilino)-N-(2-hydroxyethoxy)imidazo[1,5-a]pyridine-6-carboxamide	C1=CC(=C(C=C1I)F)NC2=C(C=CC3=CN=CN32)C(=O)NOCCO		MAP2K1
5-(2-fluoro-4-iodoanilino)-N-(2-hydroxyethoxy)imidazo[1,5-a]pyridine-6-carboxamide	C1=CC(=C(C=C1I)F)NC2=C(C=CC3=CN=CN32)C(=O)NOCCO		MAP2K2
N-[(2R)-2,3-dihydroxypropoxy]-3,4-difluoro-2-(2-fluoro-4-iodoanilino)benzamide	C1=CC(=C(C=C1I)F)NC2=C(C=CC(=C2F)F)C(=O)NOCC(CO)O		MAP2K1
N-[(2R)-2,3-dihydroxypropoxy]-3,4-difluoro-2-(2-fluoro-4-iodoanilino)benzamide	C1=CC(=C(C=C1I)F)NC2=C(C=CC(=C2F)F)C(=O)NOCC(CO)O		MAP2K2
N-[(2R)-2,3-dihydroxypropoxy]-3,4-difluoro-2-(2-fluoro-4-iodoanilino)benzamide	C1=CC(=C(C=C1I)F)NC2=C(C=CC(=C2F)F)C(=O)NOCC(CO)O		MAP2K4
N-[(2R)-2,3-dihydroxypropoxy]-3,4-difluoro-2-(2-fluoro-4-iodoanilino)benzamide	C1=CC(=C(C=C1I)F)NC2=C(C=CC(=C2F)F)C(=O)NOCC(CO)O		MAP2K6
N-[(2S)-2,3-dihydroxypropyl]-3-(2-fluoro-4-iodoanilino)pyridine-4-carboxamide	C1=CC(=C(C=C1I)F)NC2=C(C=CN=C2)C(=O)NCC(CO)O		MAP2K1
N-[(2S)-2,3-dihydroxypropyl]-3-(2-fluoro-4-iodoanilino)pyridine-4-carboxamide	C1=CC(=C(C=C1I)F)NC2=C(C=CN=C2)C(=O)NCC(CO)O		MAP2K2
(2R)-2-amino-3-[4-(4-hydroxy-3,5-diiodophenoxy)-3,5-diiodophenyl]propanoic acid	C1=C(C=C(C(=C1I)OC2=CC(=C(C(=C2)I)O)I)I)CC(C(=O)O)N		THRA
(2R)-2-amino-3-[4-(4-hydroxy-3,5-diiodophenoxy)-3,5-diiodophenyl]propanoic acid	C1=C(C=C(C(=C1I)OC2=CC(=C(C(=C2)I)O)I)I)CC(C(=O)O)N		THRB
1-[3-chloro-5-[[4-(4-chlorothiophen-2-yl)-5-(4-cyclohexylpiperazin-1-yl)-1,3-thiazol-2-yl]carbamoyl]pyridin-2-yl]piperidine-4-carboxylic acid	C1CCC(CC1)N2CCN(CC2)C3=C(N=C(S3)NC(=O)C4=CC(=C(N=C4)N5CCC(CC5)C(=O)O)Cl)C6=CC(=CS6)Cl		MPL
3-[[1-cyclohexyl-4-oxo-8-(4-oxo-4-phenylbutyl)-1,3,8-triazaspiro[4.5]decan-3-yl]methyl]benzoic acid	C1CCC(CC1)N2CN(C(=O)C23CCN(CC3)CCCC(=O)C4=CC=CC=C4)CC5=CC(=CC=C5)C(=O)O		DRD2
6-[4-(1-cyclohexyltetrazol-5-yl)butoxy]-3,4-dihydro-1H-quinolin-2-one	C1CCC(CC1)N2C(=NN=N2)CCCCOC3=CC4=C(C=C3)NC(=O)CC4		PDE3A
9-(6-aminopyridin-3-yl)-1-[3-(trifluoromethyl)phenyl]benzo[h][1,6]naphthyridin-2-one	C1=CC(=CC(=C1)N2C(=O)C=CC3=CN=C4C=CC(=CC4=C32)C5=CN=C(C=C5)N)C(F)(F)F		ATM
9-(6-aminopyridin-3-yl)-1-[3-(trifluoromethyl)phenyl]benzo[h][1,6]naphthyridin-2-one	C1=CC(=CC(=C1)N2C(=O)C=CC3=CN=C4C=CC(=CC4=C32)C5=CN=C(C=C5)N)C(F)(F)F		ATR
9-(6-aminopyridin-3-yl)-1-[3-(trifluoromethyl)phenyl]benzo[h][1,6]naphthyridin-2-one	C1=CC(=CC(=C1)N2C(=O)C=CC3=CN=C4C=CC(=CC4=C32)C5=CN=C(C=C5)N)C(F)(F)F		MTOR
2-[(1,3-dicyclohexyl-2,4,6-trioxo-1,3-diazinane-5-carbonyl)amino]acetic acid	C1CCC(CC1)N2C(=O)C(C(=O)N(C2=O)C3CCCCC3)C(=O)NCC(=O)O		EGLN3
2-[(1,3-dicyclohexyl-2,4,6-trioxo-1,3-diazinane-5-carbonyl)amino]acetic acid	C1CCC(CC1)N2C(=O)C(C(=O)N(C2=O)C3CCCCC3)C(=O)NCC(=O)O		P4HTM
1-cyclopropyl-1-[(1R,2R)-2-hydroxycyclohexyl]-3-[3-[(2-oxo-1H-quinolin-6-yl)oxy]propyl]urea	C1CCC(C(C1)N(C2CC2)C(=O)NCCCOC3=CC4=C(C=C3)NC(=O)C=C4)O		PDE3A
1-cyclopropyl-1-[(1R,2R)-2-hydroxycyclohexyl]-3-[3-[(2-oxo-1H-quinolin-6-yl)oxy]propyl]urea	C1CCC(C(C1)N(C2CC2)C(=O)NCCCOC3=CC4=C(C=C3)NC(=O)C=C4)O		PDE3B
3-fluoro-N-(4-fluorophenyl)-4-hydroxy-N-(4-hydroxyphenyl)benzamide	C1=CC(=CC=C1N(C2=CC=C(C=C2)F)C(=O)C3=CC(=C(C=C3)O)F)O		ESR1
(2R,3R,4S,5R)-2-(6-amino-2-anilinopurin-9-yl)-5-(hydroxymethyl)oxolane-3,4-diol	C1=CC=C(C=C1)NC2=NC(=C3C(=N2)N(C=N3)C4C(C(C(O4)CO)O)O)N		ADORA2A
4-[[9-[(3S)-oxolan-3-yl]-8-(2,4,6-trifluoroanilino)purin-2-yl]amino]cyclohexan-1-ol	C1CC(CCC1NC2=NC=C3C(=N2)N(C(=N3)NC4=C(C=C(C=C4F)F)F)C5CCOC5)O		MAPK10
4-[(2-phenyl-7H-pyrrolo[2,3-d]pyrimidin-4-yl)amino]cyclohexan-1-ol	C1CC(CCC1NC2=NC(=NC3=C2C=CN3)C4=CC=CC=C4)O		ADORA1
N'-(3-bromo-4-fluorophenyl)-N-hydroxy-4-[2-(sulfamoylamino)ethylamino]-1,2,5-oxadiazole-3-carboximidamide	C1=CC(=C(C=C1N=C(C2=NON=C2NCCNS(=O)(=O)N)NO)Br)F		IDO1
6-[6-(hydroxymethyl)pyrimidin-4-yl]oxy-N-[3-(trifluoromethyl)phenyl]naphthalene-1-carboxamide	C1=CC(=CC(=C1)NC(=O)C2=CC=CC3=C2C=CC(=C3)OC4=NC=NC(=C4)CO)C(F)(F)F		KDR
N'-hydroxy-N-phenyloctanediamide	C1=CC=C(C=C1)NC(=O)CCCCCCC(=O)NO		HDAC11
N'-hydroxy-N-phenyloctanediamide	C1=CC=C(C=C1)NC(=O)CCCCCCC(=O)NO		HDAC5
N'-hydroxy-N-phenyloctanediamide	C1=CC=C(C=C1)NC(=O)CCCCCCC(=O)NO		HDAC9
1-[2-(3-aminopropoxy)phenyl]-3-pyrazin-2-ylurea	C1=CC=C(C(=C1)NC(=O)NC2=NC=CN=C2)OCCCN		CHEK2
5-amino-2-hydroxybenzoic acid	C1=CC(=C(C=C1N)C(=O)O)O		ALOX5
5-amino-2-hydroxybenzoic acid	C1=CC(=C(C=C1N)C(=O)O)O		PPARG
5-amino-2-hydroxybenzoic acid	C1=CC(=C(C=C1N)C(=O)O)O		PTGS1
5-amino-2-hydroxybenzoic acid	C1=CC(=C(C=C1N)C(=O)O)O		PTGS2
2-[[(1R,2S)-2-aminocyclohexyl]amino]-4-[3-(triazol-2-yl)anilino]pyrimidine-5-carboxamide	C1CCC(C(C1)N)NC2=NC=C(C(=N2)NC3=CC(=CC=C3)N4N=CC=N4)C(=O)N		SYK
N-(2-aminophenyl)-4-[[(4-pyridin-3-ylpyrimidin-2-yl)amino]methyl]benzamide	C1=CC=C(C(=C1)N)NC(=O)C2=CC=C(C=C2)CNC3=NC=CC(=N3)C4=CN=CC=C4		HDAC11
pyridin-3-ylmethyl N-[[4-[(2-aminophenyl)carbamoyl]phenyl]methyl]carbamate	C1=CC=C(C(=C1)N)NC(=O)C2=CC=C(C=C2)CNC(=O)OCC3=CN=CC=C3		HDAC11
pyridin-3-ylmethyl N-[[4-[(2-aminophenyl)carbamoyl]phenyl]methyl]carbamate	C1=CC=C(C(=C1)N)NC(=O)C2=CC=C(C=C2)CNC(=O)OCC3=CN=CC=C3		HDAC5
pyridin-3-ylmethyl N-[[4-[(2-aminophenyl)carbamoyl]phenyl]methyl]carbamate	C1=CC=C(C(=C1)N)NC(=O)C2=CC=C(C=C2)CNC(=O)OCC3=CN=CC=C3		HDAC9
(E)-N-hydroxy-3-[3-(phenylsulfamoyl)phenyl]prop-2-enamide	C1=CC=C(C=C1)NS(=O)(=O)C2=CC=CC(=C2)C=CC(=O)NO		HDAC11
(E)-N-hydroxy-3-[3-(phenylsulfamoyl)phenyl]prop-2-enamide	C1=CC=C(C=C1)NS(=O)(=O)C2=CC=CC(=C2)C=CC(=O)NO		HDAC5
(E)-N-hydroxy-3-[3-(phenylsulfamoyl)phenyl]prop-2-enamide	C1=CC=C(C=C1)NS(=O)(=O)C2=CC=CC(=C2)C=CC(=O)NO		HDAC9
3-(3,5-dibromo-4-hydroxyphenyl)-N-[(4-phenoxyphenyl)methyl]-1,2,4-oxadiazole-5-carboxamide	C1=CC=C(C=C1)OC2=CC=C(C=C2)CNC(=O)C3=NC(=NO3)C4=CC(=C(C(=C4)Br)O)Br		CFTR
(2S)-2-amino-3-[4-(4-hydroxy-3-iodophenoxy)-3,5-diiodophenyl]propanoic acid	C1=CC(=C(C=C1OC2=C(C=C(C=C2I)CC(C(=O)O)N)I)I)O		THRA
(2S)-2-amino-3-[4-(4-hydroxy-3-iodophenoxy)-3,5-diiodophenyl]propanoic acid	C1=CC(=C(C=C1OC2=C(C=C(C=C2I)CC(C(=O)O)N)I)I)O		THRB
3-[2,4-diamino-7-(3-hydroxyphenyl)pteridin-6-yl]phenol	C1=CC(=CC(=C1)O)C2=NC3=C(N=C(N=C3N=C2C4=CC(=CC=C4)O)N)N		PIK3CD
3-[2,4-diamino-7-(3-hydroxyphenyl)pteridin-6-yl]phenol	C1=CC(=CC(=C1)O)C2=NC3=C(N=C(N=C3N=C2C4=CC(=CC=C4)O)N)N		PIK3CG
[5-[3-amino-5-[4-(trifluoromethoxy)phenyl]sulfonylpyridin-2-yl]-1,3,4-oxadiazol-2-yl]methanol	C1=CC(=CC=C1OC(F)(F)F)S(=O)(=O)C2=CC(=C(N=C2)C3=NN=C(O3)CO)N		CFTR
3-[[5-fluoro-2-(3-hydroxyanilino)pyrimidin-4-yl]amino]phenol	C1=CC(=CC(=C1)O)NC2=NC(=NC=C2F)NC3=CC(=CC=C3)O		SYK
(2R,3S,4S,5R,6S)-2-(hydroxymethyl)-6-(4-hydroxyphenoxy)oxane-3,4,5-triol	C1=CC(=CC=C1O)OC2C(C(C(C(O2)CO)O)O)O		TYR
benzene-1,3,5-triol	C1=C(C=C(C=C1O)O)O		CACNA1A
benzene-1,3,5-triol	C1=C(C=C(C=C1O)O)O		CACNA1C
benzene-1,3,5-triol	C1=C(C=C(C=C1O)O)O		CACNA1D
benzene-1,3,5-triol	C1=C(C=C(C=C1O)O)O		CACNA1H
benzene-1,3,5-triol	C1=C(C=C(C=C1O)O)O		CACNA2D1
benzene-1,3,5-triol	C1=C(C=C(C=C1O)O)O		CACNA2D2
benzene-1,3,5-triol	C1=C(C=C(C=C1O)O)O		CACNA2D3
benzene-1,3,5-triol	C1=C(C=C(C=C1O)O)O		CACNA2D4
benzene-1,3,5-triol	C1=C(C=C(C=C1O)O)O		CACNB3
benzene-1,3,5-triol	C1=C(C=C(C=C1O)O)O		CACNG4
benzene-1,3,5-triol	C1=C(C=C(C=C1O)O)O		CACNG6
benzene-1,3,5-triol	C1=C(C=C(C=C1O)O)O		CACNG7
(2R)-2-[(4-chlorophenyl)sulfonyl-[[2-fluoro-4-(1,2,4-oxadiazol-3-yl)phenyl]methyl]amino]-5,5,5-trifluoropentanamide	C1=CC(=CC=C1S(=O)(=O)N(CC2=C(C=C(C=C2)C3=NOC=N3)F)C(CCC(F)(F)F)C(=O)N)Cl		APH1B
(2R)-2-[(4-chlorophenyl)sulfonyl-[[2-fluoro-4-(1,2,4-oxadiazol-3-yl)phenyl]methyl]amino]-5,5,5-trifluoropentanamide	C1=CC(=CC=C1S(=O)(=O)N(CC2=C(C=C(C=C2)C3=NOC=N3)F)C(CCC(F)(F)F)C(=O)N)Cl		PSEN2
4,5-dichlorobenzene-1,3-disulfonamide	C1=C(C=C(C(=C1S(=O)(=O)N)Cl)Cl)S(=O)(=O)N		CA12
4,5-dichlorobenzene-1,3-disulfonamide	C1=C(C=C(C(=C1S(=O)(=O)N)Cl)Cl)S(=O)(=O)N		CA2
(2R,3R,4R,5S)-1-(2-hydroxyethyl)-2-(hydroxymethyl)piperidine-3,4,5-triol	C1C(C(C(C(N1CCO)CO)O)O)O		GAA
7-[[(3R,4R)-3-hydroxy-4-(hydroxymethyl)pyrrolidin-1-yl]methyl]-3,5-dihydropyrrolo[3,2-d]pyrimidin-4-one	C1C(C(CN1CC2=CNC3=C2N=CNC3=O)O)CO		PNP
[3-[4-(aminomethyl)-6-(trifluoromethyl)pyridin-2-yl]oxyphenyl]-[(3R,4R)-3-fluoro-4-hydroxypyrrolidin-1-yl]methanone	C1C(C(CN1C(=O)C2=CC(=CC=C2)OC3=CC(=CC(=N3)C(F)(F)F)CN)F)O		LOXL2
(5Z)-5-[[2-[(3R)-3-aminopiperidin-1-yl]-3-phenylphenyl]methylidene]-1,3-thiazolidine-2,4-dione	C1CC(CN(C1)C2=C(C=CC=C2C3=CC=CC=C3)C=C4C(=O)NC(=O)S4)N		PIM1
(5Z)-5-[[2-[(3R)-3-aminopiperidin-1-yl]-3-phenylphenyl]methylidene]-1,3-thiazolidine-2,4-dione	C1CC(CN(C1)C2=C(C=CC=C2C3=CC=CC=C3)C=C4C(=O)NC(=O)S4)N		PIM2
[(E)-(3-aminopyridin-2-yl)methylideneamino]thiourea	C1=CC(=C(N=C1)C=NNC(=S)N)N		RRM2
3-(carbamoylamino)-5-(3-fluorophenyl)-N-[(3S)-piperidin-3-yl]thiophene-2-carboxamide	C1CC(CNC1)NC(=O)C2=C(C=C(S2)C3=CC(=CC=C3)F)NC(=O)N		CHEK2
1-[(2S)-2-amino-4-[2,4-bis(trifluoromethyl)-6,8-dihydro-5H-pyrido[3,4-d]pyrimidin-7-yl]-4-oxobutyl]-5,5-difluoropiperidin-2-one	C1CC(CN(C1=O)CC(CC(=O)N2CCC3=C(C2)N=C(N=C3C(F)(F)F)C(F)(F)F)N)(F)F		DPP4
5-chloro-4-hydroxy-1H-pyridin-2-one	C1=C(C(=CNC1=O)Cl)O		DPYD
2-[[(2R)-1-[4-[4-[3-(azepan-1-yl)propoxy]phenyl]butyl]pyrrolidin-2-yl]methyl]-4-[(4-chlorophenyl)methyl]phthalazin-1-one	C1CCCN(CC1)CCCOC2=CC=C(C=C2)CCCCN3CCCC3CN4C(=O)C5=CC=CC=C5C(=N4)CC6=CC=C(C=C6)Cl		HRH1
(3R,4S)-1-(6-amino-5-fluoropyrimidin-4-yl)-3-[(3R)-3-[3-chloro-5-(trifluoromethyl)anilino]-2-oxopiperidin-1-yl]piperidine-4-carboxamide	C1CC(C(=O)N(C1)C2CN(CCC2C(=O)N)C3=NC=NC(=C3F)N)NC4=CC(=CC(=C4)C(F)(F)F)Cl		BTK
N-[(3R,6S)-6-(2,3-difluorophenyl)-2-oxo-1-(2,2,2-trifluoroethyl)azepan-3-yl]-4-(2-oxo-3H-imidazo[4,5-b]pyridin-1-yl)piperidine-1-carboxamide	C1CC(C(=O)N(CC1C2=C(C(=CC=C2)F)F)CC(F)(F)F)NC(=O)N3CCC(CC3)N4C5=C(NC4=O)N=CC=C5		CALCRL
1-(3,4-diazatricyclo[9.4.0.02,7]pentadeca-1(15),2,4,6,11,13-hexaen-5-yl)-3-N-[(7S)-7-pyrrolidin-1-yl-6,7,8,9-tetrahydro-5H-benzo[7]annulen-3-yl]-1,2,4-triazole-3,5-diamine	C1CCN(C1)C2CCC3=C(CC2)C=C(C=C3)NC4=NN(C(=N4)N)C5=NN=C6C(=C5)CCCC7=CC=CC=C76		AXL
1,1,1,3,3,3-hexafluoropropan-2-yl 4-[[2-pyrrolidin-1-yl-4-(trifluoromethyl)phenyl]methyl]piperazine-1-carboxylate	C1CCN(C1)C2=C(C=CC(=C2)C(F)(F)F)CN3CCN(CC3)C(=O)OC(C(F)(F)F)C(F)(F)F		MGLL
4-[(2R)-2-[(1R)-2,2,2-trifluoro-1-hydroxyethyl]pyrrolidin-1-yl]-2-(trifluoromethyl)benzonitrile	C1CC(N(C1)C2=CC(=C(C=C2)C#N)C(F)(F)F)C(C(F)(F)F)O		AR
(2S,5R)-5-[4-[(2-fluorophenyl)methoxy]phenyl]pyrrolidine-2-carboxamide	C1CC(NC1C2=CC=C(C=C2)OCC3=CC=CC=C3F)C(=O)N		SCN9A
(3S)-N-[5-[(2R)-2-(2,5-difluorophenyl)pyrrolidin-1-yl]pyrazolo[1,5-a]pyrimidin-3-yl]-3-hydroxypyrrolidine-1-carboxamide	C1CC(N(C1)C2=NC3=C(C=NN3C=C2)NC(=O)N4CCC(C4)O)C5=C(C=CC(=C5)F)F		NTRK1
(3S)-N-[5-[(2R)-2-(2,5-difluorophenyl)pyrrolidin-1-yl]pyrazolo[1,5-a]pyrimidin-3-yl]-3-hydroxypyrrolidine-1-carboxamide	C1CC(N(C1)C2=NC3=C(C=NN3C=C2)NC(=O)N4CCC(C4)O)C5=C(C=CC(=C5)F)F		NTRK2
(3S)-N-[5-[(2R)-2-(2,5-difluorophenyl)pyrrolidin-1-yl]pyrazolo[1,5-a]pyrimidin-3-yl]-3-hydroxypyrrolidine-1-carboxamide	C1CC(N(C1)C2=NC3=C(C=NN3C=C2)NC(=O)N4CCC(C4)O)C5=C(C=CC(=C5)F)F		NTRK3
5-(3-phenylmethoxyphenyl)-7-[3-(pyrrolidin-1-ylmethyl)cyclobutyl]pyrrolo[2,3-d]pyrimidin-4-amine	C1CCN(C1)CC2CC(C2)N3C=C(C4=C(N=CN=C43)N)C5=CC(=CC=C5)OCC6=CC=CC=C6		IGF1R
3-[(4-bromo-2,6-difluorophenyl)methoxy]-5-(4-pyrrolidin-1-ylbutylcarbamoylamino)-1,2-thiazole-4-carboxamide	C1CCN(C1)CCCCNC(=O)NC2=C(C(=NS2)OCC3=C(C=C(C=C3F)Br)F)C(=O)N		KDR
2-[(2R)-3-[(2S)-2-benzylpyrrolidin-1-yl]-2-hydroxypropoxy]-6-chlorobenzonitrile	C1CC(N(C1)CC(COC2=C(C(=CC=C2)Cl)C#N)O)CC3=CC=CC=C3		GABRA2
2-[(2R)-3-[(2S)-2-benzylpyrrolidin-1-yl]-2-hydroxypropoxy]-6-chlorobenzonitrile	C1CC(N(C1)CC(COC2=C(C(=CC=C2)Cl)C#N)O)CC3=CC=CC=C3		GABRA3
(16E)-11-(2-pyrrolidin-1-ylethoxy)-14,19-dioxa-5,7,27-triazatetracyclo[19.3.1.12,6.18,12]heptacosa-1(24),2(27),3,5,8(26),9,11,16,21(25),22-decaene	C1CCN(C1)CCOC2=C3COCC=CCOCC4=CC(=CC=C4)C5=NC(=NC=C5)NC(=C3)C=C2		FLT3
(16E)-11-(2-pyrrolidin-1-ylethoxy)-14,19-dioxa-5,7,27-triazatetracyclo[19.3.1.12,6.18,12]heptacosa-1(24),2(27),3,5,8(26),9,11,16,21(25),22-decaene	C1CCN(C1)CCOC2=C3COCC=CCOCC4=CC(=CC=C4)C5=NC(=NC=C5)NC(=C3)C=C2		JAK2
(9E)-15-(2-pyrrolidin-1-ylethoxy)-7,12,26-trioxa-19,21,24-triazatetracyclo[18.3.1.12,5.114,18]hexacosa-1(24),2,4,9,14,16,18(25),20,22-nonaene	C1CCN(C1)CCOC2=C3COCC=CCOCC4=CC=C(O4)C5=NC(=NC=C5)NC(=C3)C=C2		CSF1R
(9E)-15-(2-pyrrolidin-1-ylethoxy)-7,12,26-trioxa-19,21,24-triazatetracyclo[18.3.1.12,5.114,18]hexacosa-1(24),2,4,9,14,16,18(25),20,22-nonaene	C1CCN(C1)CCOC2=C3COCC=CCOCC4=CC=C(O4)C5=NC(=NC=C5)NC(=C3)C=C2		FLT3
(9E)-15-(2-pyrrolidin-1-ylethoxy)-7,12,26-trioxa-19,21,24-triazatetracyclo[18.3.1.12,5.114,18]hexacosa-1(24),2,4,9,14,16,18(25),20,22-nonaene	C1CCN(C1)CCOC2=C3COCC=CCOCC4=CC=C(O4)C5=NC(=NC=C5)NC(=C3)C=C2		JAK2
(5R,6S)-6-phenyl-5-[4-(2-pyrrolidin-1-ylethoxy)phenyl]-5,6,7,8-tetrahydronaphthalen-2-ol	C1CCN(C1)CCOC2=CC=C(C=C2)C3C(CCC4=C3C=CC(=C4)O)C5=CC=CC=C5		ESR1
N-[1-(2-carbamoylpyrrolidin-1-yl)-3-(1H-imidazol-5-yl)-1-oxopropan-2-yl]-5-oxopyrrolidine-2-carboxamide	C1CC(N(C1)C(=O)C(CC2=CN=CN2)NC(=O)C3CCC(=O)N3)C(=O)N		TSHR
(2S)-1-[(2S)-6-amino-2-[[(1S)-1-carboxy-3-phenylpropyl]amino]hexanoyl]pyrrolidine-2-carboxylic acid	C1CC(N(C1)C(=O)C(CCCCN)NC(CCC2=CC=CC=C2)C(=O)O)C(=O)O		ACE
1-[2-[(3-hydroxy-1-adamantyl)amino]acetyl]pyrrolidine-2-carbonitrile	C1CC(N(C1)C(=O)CNC23CC4CC(C2)CC(C4)(C3)O)C#N		DPP4
N-[4-[2-(4-morpholin-4-ylanilino)pyrimidin-4-yl]phenyl]pyrrolidine-2-carboxamide	C1CC(NC1)C(=O)NC2=CC=C(C=C2)C3=NC(=NC=C3)NC4=CC=C(C=C4)N5CCOCC5		JAK2
[3,4-difluoro-2-(2-fluoro-4-iodoanilino)phenyl]-[3-hydroxy-3-[(2S)-piperidin-2-yl]azetidin-1-yl]methanone	C1CCNC(C1)C2(CN(C2)C(=O)C3=C(C(=C(C=C3)F)F)NC4=C(C=C(C=C4)I)F)O		MAP2K1
[3,4-difluoro-2-(2-fluoro-4-iodoanilino)phenyl]-[3-hydroxy-3-[(2S)-piperidin-2-yl]azetidin-1-yl]methanone	C1CCNC(C1)C2(CN(C2)C(=O)C3=C(C(=C(C=C3)F)F)NC4=C(C=C(C=C4)I)F)O		MAP2K2
[3,4-difluoro-2-(2-fluoro-4-iodoanilino)phenyl]-[3-hydroxy-3-[(2S)-piperidin-2-yl]azetidin-1-yl]methanone	C1CCNC(C1)C2(CN(C2)C(=O)C3=C(C(=C(C=C3)F)F)NC4=C(C=C(C=C4)I)F)O		MAP2K4
[3,4-difluoro-2-(2-fluoro-4-iodoanilino)phenyl]-[3-hydroxy-3-[(2S)-piperidin-2-yl]azetidin-1-yl]methanone	C1CCNC(C1)C2(CN(C2)C(=O)C3=C(C(=C(C=C3)F)F)NC4=C(C=C(C=C4)I)F)O		MAP2K6
2-[[2-[bis(2-hydroxyethyl)amino]-4,8-di(piperidin-1-yl)pyrimido[5,4-d]pyrimidin-6-yl]-(2-hydroxyethyl)amino]ethanol	C1CCN(CC1)C2=NC(=NC3=C2N=C(N=C3N4CCCCC4)N(CCO)CCO)N(CCO)CCO		PDE1B
2-[[2-[bis(2-hydroxyethyl)amino]-4,8-di(piperidin-1-yl)pyrimido[5,4-d]pyrimidin-6-yl]-(2-hydroxyethyl)amino]ethanol	C1CCN(CC1)C2=NC(=NC3=C2N=C(N=C3N4CCCCC4)N(CCO)CCO)N(CCO)CCO		PDE1C
2-[[2-[bis(2-hydroxyethyl)amino]-4,8-di(piperidin-1-yl)pyrimido[5,4-d]pyrimidin-6-yl]-(2-hydroxyethyl)amino]ethanol	C1CCN(CC1)C2=NC(=NC3=C2N=C(N=C3N4CCCCC4)N(CCO)CCO)N(CCO)CCO		PDE2A
2-[[2-[bis(2-hydroxyethyl)amino]-4,8-di(piperidin-1-yl)pyrimido[5,4-d]pyrimidin-6-yl]-(2-hydroxyethyl)amino]ethanol	C1CCN(CC1)C2=NC(=NC3=C2N=C(N=C3N4CCCCC4)N(CCO)CCO)N(CCO)CCO		PDE3A
2-[[2-[bis(2-hydroxyethyl)amino]-4,8-di(piperidin-1-yl)pyrimido[5,4-d]pyrimidin-6-yl]-(2-hydroxyethyl)amino]ethanol	C1CCN(CC1)C2=NC(=NC3=C2N=C(N=C3N4CCCCC4)N(CCO)CCO)N(CCO)CCO		PDE3B
2-[[2-[bis(2-hydroxyethyl)amino]-4,8-di(piperidin-1-yl)pyrimido[5,4-d]pyrimidin-6-yl]-(2-hydroxyethyl)amino]ethanol	C1CCN(CC1)C2=NC(=NC3=C2N=C(N=C3N4CCCCC4)N(CCO)CCO)N(CCO)CCO		PDE4B
2-[[2-[bis(2-hydroxyethyl)amino]-4,8-di(piperidin-1-yl)pyrimido[5,4-d]pyrimidin-6-yl]-(2-hydroxyethyl)amino]ethanol	C1CCN(CC1)C2=NC(=NC3=C2N=C(N=C3N4CCCCC4)N(CCO)CCO)N(CCO)CCO		PDE4C
2-[[2-[bis(2-hydroxyethyl)amino]-4,8-di(piperidin-1-yl)pyrimido[5,4-d]pyrimidin-6-yl]-(2-hydroxyethyl)amino]ethanol	C1CCN(CC1)C2=NC(=NC3=C2N=C(N=C3N4CCCCC4)N(CCO)CCO)N(CCO)CCO		PDE4D
2-[[2-[bis(2-hydroxyethyl)amino]-4,8-di(piperidin-1-yl)pyrimido[5,4-d]pyrimidin-6-yl]-(2-hydroxyethyl)amino]ethanol	C1CCN(CC1)C2=NC(=NC3=C2N=C(N=C3N4CCCCC4)N(CCO)CCO)N(CCO)CCO		PDE5A
2-[[2-[bis(2-hydroxyethyl)amino]-4,8-di(piperidin-1-yl)pyrimido[5,4-d]pyrimidin-6-yl]-(2-hydroxyethyl)amino]ethanol	C1CCN(CC1)C2=NC(=NC3=C2N=C(N=C3N4CCCCC4)N(CCO)CCO)N(CCO)CCO		PDE6B
2-[[2-[bis(2-hydroxyethyl)amino]-4,8-di(piperidin-1-yl)pyrimido[5,4-d]pyrimidin-6-yl]-(2-hydroxyethyl)amino]ethanol	C1CCN(CC1)C2=NC(=NC3=C2N=C(N=C3N4CCCCC4)N(CCO)CCO)N(CCO)CCO		PDE7A
2-[[2-[bis(2-hydroxyethyl)amino]-4,8-di(piperidin-1-yl)pyrimido[5,4-d]pyrimidin-6-yl]-(2-hydroxyethyl)amino]ethanol	C1CCN(CC1)C2=NC(=NC3=C2N=C(N=C3N4CCCCC4)N(CCO)CCO)N(CCO)CCO		PDE9A
2-[[2-[bis(2-hydroxyethyl)amino]-4,8-di(piperidin-1-yl)pyrimido[5,4-d]pyrimidin-6-yl]-(2-hydroxyethyl)amino]ethanol	C1CCN(CC1)C2=NC(=NC3=C2N=C(N=C3N4CCCCC4)N(CCO)CCO)N(CCO)CCO		SLC29A1
3-hydroxy-2-imino-6-piperidin-1-ylpyrimidin-4-amine	C1CCN(CC1)C2=NC(=N)N(C(=C2)N)O		KCNJ11
4-[(S)-hydroxy-[(2R)-piperidin-2-yl]methyl]benzene-1,2-diol	C1CCNC(C1)C(C2=CC(=C(C=C2)O)O)O		ADRB2
5-[(5-chloro-1H-pyrrolo[2,3-b]pyridin-3-yl)methyl]-N-[[6-(trifluoromethyl)pyridin-3-yl]methyl]pyridin-2-amine	C1=CC(=NC=C1CC2=CNC3=C2C=C(C=N3)Cl)NCC4=CN=C(C=C4)C(F)(F)F		CSF1R
5-[(5-chloro-1H-pyrrolo[2,3-b]pyridin-3-yl)methyl]-N-[[6-(trifluoromethyl)pyridin-3-yl]methyl]pyridin-2-amine	C1=CC(=NC=C1CC2=CNC3=C2C=C(C=N3)Cl)NCC4=CN=C(C=C4)C(F)(F)F		FLT3
5-[(5-chloro-1H-pyrrolo[2,3-b]pyridin-3-yl)methyl]-N-[[6-(trifluoromethyl)pyridin-3-yl]methyl]pyridin-2-amine	C1=CC(=NC=C1CC2=CNC3=C2C=C(C=N3)Cl)NCC4=CN=C(C=C4)C(F)(F)F		KIT
6-[4-(2-piperidin-1-ylethoxy)phenyl]-3-thiophen-3-ylpyrazolo[1,5-a]pyrimidine	C1CCN(CC1)CCOC2=CC=C(C=C2)C3=CN4C(=C(C=N4)C5=CSC=C5)N=C3		FLT1
6-[4-(2-piperidin-1-ylethoxy)phenyl]-3-thiophen-3-ylpyrazolo[1,5-a]pyrimidine	C1CCN(CC1)CCOC2=CC=C(C=C2)C3=CN4C(=C(C=N4)C5=CSC=C5)N=C3		FLT4
6-[4-(2-piperidin-1-ylethoxy)phenyl]-3-thiophen-3-ylpyrazolo[1,5-a]pyrimidine	C1CCN(CC1)CCOC2=CC=C(C=C2)C3=CN4C(=C(C=N4)C5=CSC=C5)N=C3		KDR
3-[3-(2-piperidin-1-ylethoxy)phenyl]-5-(1H-1,2,4-triazol-5-yl)-1H-indazole	C1CCN(CC1)CCOC2=CC=CC(=C2)C3=NNC4=C3C=C(C=C4)C5=NC=NN5		MAPK10
N-[6-[4-[5-[(2-pyridin-2-ylacetyl)amino]-1,3,4-thiadiazol-2-yl]butyl]pyridazin-3-yl]-2-[3-(trifluoromethoxy)phenyl]acetamide	C1=CC=NC(=C1)CC(=O)NC2=NN=C(S2)CCCCC3=NN=C(C=C3)NC(=O)CC4=CC(=CC=C4)OC(F)(F)F		GLS
2-[[6-[[(4-pyrazol-1-ylphenyl)methyl-pyridin-3-ylsulfonylamino]methyl]pyridin-2-yl]amino]acetic acid	C1=CC(=NC(=C1)NCC(=O)O)CN(CC2=CC=C(C=C2)N3C=CC=N3)S(=O)(=O)C4=CN=CC=C4		PTGER2
2-hydroxy-5-[[4-(pyridin-2-ylsulfamoyl)phenyl]diazenyl]benzoic acid	C1=CC=NC(=C1)NS(=O)(=O)C2=CC=C(C=C2)N=NC3=CC(=C(C=C3)O)C(=O)O		ALOX5
2-hydroxy-5-[[4-(pyridin-2-ylsulfamoyl)phenyl]diazenyl]benzoic acid	C1=CC=NC(=C1)NS(=O)(=O)C2=CC=C(C=C2)N=NC3=CC(=C(C=C3)O)C(=O)O		PTGS1
2-hydroxy-5-[[4-(pyridin-2-ylsulfamoyl)phenyl]diazenyl]benzoic acid	C1=CC=NC(=C1)NS(=O)(=O)C2=CC=C(C=C2)N=NC3=CC(=C(C=C3)O)C(=O)O		PTGS2
4-amino-5-fluoro-1-[(2S,5R)-5-(hydroxymethyl)-2,5-dihydrofuran-2-yl]pyrimidin-2-one	C1=CC(OC1CO)N2C=C(C(=NC2=O)N)F		OCA2
5-fluoro-1-(oxolan-2-yl)pyrimidine-2,4-dione	C1CC(OC1)N2C=C(C(=O)NC2=O)F		TYMS
5-fluoro-1-[(2R,4S,5R)-4-hydroxy-5-(hydroxymethyl)oxolan-2-yl]pyrimidine-2,4-dione	C1C(C(OC1N2C=C(C(=O)NC2=O)F)CO)O		TYMS
(8R)-3-[(2R,4S,5R)-4-hydroxy-5-(hydroxymethyl)oxolan-2-yl]-7,8-dihydro-4H-imidazo[4,5-d][1,3]diazepin-8-ol	C1C(C(OC1N2C=NC3=C2NC=NCC3O)CO)O		ADA
4-amino-1-[(2R,4S,5R)-4-hydroxy-5-(hydroxymethyl)oxolan-2-yl]-1,3,5-triazin-2-one	C1C(C(OC1N2C=NC(=NC2=O)N)CO)O		DNMT3A
(2S)-N-[(1S)-1-(2-chlorophenyl)-2-[(3,3-difluorocyclobutyl)amino]-2-oxoethyl]-1-(4-cyanopyridin-2-yl)-N-(5-fluoropyridin-3-yl)-5-oxopyrrolidine-2-carboxamide	C1CC(=O)N(C1C(=O)N(C2=CC(=CN=C2)F)C(C3=CC=CC=C3Cl)C(=O)NC4CC(C4)(F)F)C5=NC=CC(=C5)C#N		IDH1
7-[4-[4-(2,3-dichlorophenyl)piperazin-1-yl]butoxy]-3,4-dihydro-1H-quinolin-2-one	C1CC(=O)NC2=C1C=CC(=C2)OCCCCN3CCN(CC3)C4=C(C(=CC=C4)Cl)Cl		DRD2
7-[4-(4-naphthalen-1-ylpiperazin-1-yl)butoxy]-3,4-dihydro-1H-1,8-naphthyridin-2-one	C1CC(=O)NC2=C1C=CC(=N2)OCCCCN3CCN(CC3)C4=CC=CC5=CC=CC=C54		DRD2
5-[[(1R,1aS,6bR)-1-[6-(trifluoromethyl)-1H-benzimidazol-2-yl]-1a,6b-dihydro-1H-cyclopropa[b][1]benzofuran-5-yl]oxy]-3,4-dihydro-1H-1,8-naphthyridin-2-one	C1CC(=O)NC2=NC=CC(=C21)OC3=CC4=C(C=C3)OC5C4C5C6=NC7=C(N6)C=C(C=C7)C(F)(F)F		BRAF
3-(7-amino-3-oxo-1H-isoindol-2-yl)piperidine-2,6-dione	C1CC(=O)NC(=O)C1N2CC3=C(C2=O)C=CC=C3N		TNF
3-(7-amino-3-oxo-1H-isoindol-2-yl)piperidine-2,6-dione	C1CC(=O)NC(=O)C1N2CC3=C(C2=O)C=CC=C3N		VEGFA
3-(7-amino-3-oxo-1H-isoindol-2-yl)piperidine-2,6-dione	C1CC(=O)NC(=O)C1N2CC3=C(C2=O)C=CC=C3N		VEGFC
5-fluoro-1H-pyrimidine-2,4-dione	C1=C(C(=O)NC(=O)N1)F		TYMS
3,4-difluoro-2-(2-fluoro-4-iodoanilino)-N-(2-hydroxyethoxy)-5-[(3-oxooxazinan-2-yl)methyl]benzamide	C1CC(=O)N(OC1)CC2=CC(=C(C(=C2F)F)NC3=C(C=C(C=C3)I)F)C(=O)NOCCO		MAP2K1
3,4-difluoro-2-(2-fluoro-4-iodoanilino)-N-(2-hydroxyethoxy)-5-[(3-oxooxazinan-2-yl)methyl]benzamide	C1CC(=O)N(OC1)CC2=CC(=C(C(=C2F)F)NC3=C(C=C(C=C3)I)F)C(=O)NOCCO		MAP2K2
4-(1,1-dioxothiazinan-2-yl)benzenesulfonamide	C1CCS(=O)(=O)N(C1)C2=CC=C(C=C2)S(=O)(=O)N		CA12
4-(1,1-dioxothiazinan-2-yl)benzenesulfonamide	C1CCS(=O)(=O)N(C1)C2=CC=C(C=C2)S(=O)(=O)N		CA14
4-(1,1-dioxothiazinan-2-yl)benzenesulfonamide	C1CCS(=O)(=O)N(C1)C2=CC=C(C=C2)S(=O)(=O)N		CA2
4-(1,1-dioxothiazinan-2-yl)benzenesulfonamide	C1CCS(=O)(=O)N(C1)C2=CC=C(C=C2)S(=O)(=O)N		CA9
10-(1-azabicyclo[2.2.2]octan-3-ylmethyl)phenothiazine	C1CN2CCC1C(C2)CN3C4=CC=CC=C4SC5=CC=CC=C53		HRH1
(1R,10S)-9-oxa-4,13-diazatetracyclo[11.2.1.01,10.03,8]hexadeca-3(8),4,6-triene	C1CN2CCC3(C2)C1OC4=C(C3)N=CC=C4		CHRNB2
(3R)-3-amino-1-[3-(trifluoromethyl)-6,8-dihydro-5H-[1,2,4]triazolo[4,3-a]pyrazin-7-yl]-4-(2,4,5-trifluorophenyl)butan-1-one	C1CN2C(=NN=C2C(F)(F)F)CN1C(=O)CC(CC3=CC(=C(C=C3F)F)F)N		DPP4
7-[3-(azetidin-1-yl)cyclobutyl]-5-(3-phenylmethoxyphenyl)pyrrolo[2,3-d]pyrimidin-4-amine	C1CN(C1)C2CC(C2)N3C=C(C4=C(N=CN=C43)N)C5=CC(=CC=C5)OCC6=CC=CC=C6		IGF1R
4-[[(1S)-2-(azetidin-1-yl)-1-[4-chloro-3-(trifluoromethyl)phenyl]ethyl]amino]quinazoline-8-carboxamide	C1CN(C1)CC(C2=CC(=C(C=C2)Cl)C(F)(F)F)NC3=NC=NC4=C3C=CC=C4C(=O)N		AKT1
4-[[(1S)-2-(azetidin-1-yl)-1-[4-chloro-3-(trifluoromethyl)phenyl]ethyl]amino]quinazoline-8-carboxamide	C1CN(C1)CC(C2=CC(=C(C=C2)Cl)C(F)(F)F)NC3=NC=NC4=C3C=CC=C4C(=O)N		AKT3
5-[(E)-2-[(3R)-pyrrolidin-3-yl]ethenyl]pyrimidine	C1CNCC1C=CC2=CN=CN=C2		CHRNA3
5-[(E)-2-[(3R)-pyrrolidin-3-yl]ethenyl]pyrimidine	C1CNCC1C=CC2=CN=CN=C2		CHRNB2
(3R)-1-[2-oxo-2-[4-(4-pyrimidin-2-ylphenyl)piperazin-1-yl]ethyl]-N-(3-pyridin-4-yl-1H-indazol-5-yl)pyrrolidine-3-carboxamide	C1CN(CC1C(=O)NC2=CC3=C(C=C2)NN=C3C4=CC=NC=C4)CC(=O)N5CCN(CC5)C6=CC=C(C=C6)C7=NC=CC=N7		MAPK1
(3,3-difluoropyrrolidin-1-yl)-[(2S,4S)-4-(4-pyrimidin-2-ylpiperazin-1-yl)pyrrolidin-2-yl]methanone	C1CN(CC1(F)F)C(=O)C2CC(CN2)N3CCN(CC3)C4=NC=CC=N4		DPP4
N-[4-[chloro(difluoro)methoxy]phenyl]-6-[(3R)-3-hydroxypyrrolidin-1-yl]-5-(1H-pyrazol-5-yl)pyridine-3-carboxamide	C1CN(CC1O)C2=C(C=C(C=N2)C(=O)NC3=CC=C(C=C3)OC(F)(F)Cl)C4=CC=NN4		ABL1
4,5,6,7-tetrahydro-[1,2]oxazolo[5,4-c]pyridin-3-one	C1CNCC2=C1C(=O)NO2		GABRA2
4,5,6,7-tetrahydro-[1,2]oxazolo[5,4-c]pyridin-3-one	C1CNCC2=C1C(=O)NO2		GABRA3
4,5,6,7-tetrahydro-[1,2]oxazolo[5,4-c]pyridin-3-one	C1CNCC2=C1C(=O)NO2		GABRB3
8-[4,4-bis(4-fluorophenyl)butyl]-1-phenyl-1,3,8-triazaspiro[4.5]decan-4-one	C1CN(CCC12C(=O)NCN2C3=CC=CC=C3)CCCC(C4=CC=C(C=C4)F)C5=CC=C(C=C5)F		DRD2
4-[4-(4-bromophenyl)-4-hydroxypiperidin-1-yl]-1-(4-fluorophenyl)butan-1-one	C1CN(CCC1(C2=CC=C(C=C2)Br)O)CCCC(=O)C3=CC=C(C=C3)F		DRD2
4-(4-chlorophenyl)-4-[4-(1H-pyrazol-4-yl)phenyl]piperidine	C1CNCCC1(C2=CC=C(C=C2)C3=CNN=C3)C4=CC=C(C=C4)Cl		AKT1
1-[2-[4-[5-chloro-1-(4-fluorophenyl)indol-3-yl]piperidin-1-yl]ethyl]imidazolidin-2-one	C1CN(CCC1C2=CN(C3=C2C=C(C=C3)Cl)C4=CC=C(C=C4)F)CCN5CCNC5=O		ADRA1B
1-[2-[4-[5-chloro-1-(4-fluorophenyl)indol-3-yl]piperidin-1-yl]ethyl]imidazolidin-2-one	C1CN(CCC1C2=CN(C3=C2C=C(C=C3)Cl)C4=CC=C(C=C4)F)CCN5CCNC5=O		DRD2
4-(5-pyridin-4-yl-1H-1,2,4-triazol-3-yl)pyridine-2-carbonitrile	C1=CN=CC=C1C2=NC(=NN2)C3=CC(=NC=C3)C#N		XDH
N-pyridazin-3-yl-4-[[3-[5-(trifluoromethyl)pyridin-2-yl]oxyphenyl]methylidene]piperidine-1-carboxamide	C1CN(CCC1=CC2=CC(=CC=C2)OC3=NC=C(C=C3)C(F)(F)F)C(=O)NC4=NN=CC=C4		FAAH
(E)-N-[4-(1-benzoylpiperidin-4-yl)butyl]-3-pyridin-3-ylprop-2-enamide	C1CN(CCC1CCCCNC(=O)C=CC2=CN=CC=C2)C(=O)C3=CC=CC=C3		NAMPT
2-[1-[4-[4-(4-hydroxypiperidin-1-yl)anilino]-5-oxo-6H-pyrimido[4,5-d]pyridazin-2-yl]piperidin-4-yl]acetonitrile	C1CN(CCC1CC#N)C2=NC3=C(C(=O)NN=C3)C(=N2)NC4=CC=C(C=C4)N5CCC(CC5)O		JAK1
2-[1-[4-[4-(4-hydroxypiperidin-1-yl)anilino]-5-oxo-6H-pyrimido[4,5-d]pyridazin-2-yl]piperidin-4-yl]acetonitrile	C1CN(CCC1CC#N)C2=NC3=C(C(=O)NN=C3)C(=N2)NC4=CC=C(C=C4)N5CCC(CC5)O		JAK2
2-[1-[4-[4-(4-hydroxypiperidin-1-yl)anilino]-5-oxo-6H-pyrimido[4,5-d]pyridazin-2-yl]piperidin-4-yl]acetonitrile	C1CN(CCC1CC#N)C2=NC3=C(C(=O)NN=C3)C(=N2)NC4=CC=C(C=C4)N5CCC(CC5)O		JAK3
2-[1-[4-[4-(4-hydroxypiperidin-1-yl)anilino]-5-oxo-6H-pyrimido[4,5-d]pyridazin-2-yl]piperidin-4-yl]acetonitrile	C1CN(CCC1CC#N)C2=NC3=C(C(=O)NN=C3)C(=N2)NC4=CC=C(C=C4)N5CCC(CC5)O		SYK
2-amino-6-fluoro-N-[5-fluoro-4-[4-[4-(oxetan-3-yl)piperazine-1-carbonyl]piperidin-1-yl]pyridin-3-yl]pyrazolo[1,5-a]pyrimidine-3-carboxamide	C1CN(CCC1C(=O)N2CCN(CC2)C3COC3)C4=C(C=NC=C4NC(=O)C5=C6N=CC(=CN6N=C5N)F)F		ATR
4-amino-N-[(1S)-1-(4-chlorophenyl)-3-hydroxypropyl]-1-(7H-pyrrolo[2,3-d]pyrimidin-4-yl)piperidine-4-carboxamide	C1CN(CCC1(C(=O)NC(CCO)C2=CC=C(C=C2)Cl)N)C3=NC=NC4=C3C=CN4		AKT1
4-amino-N-[(1S)-1-(4-chlorophenyl)-3-hydroxypropyl]-1-(7H-pyrrolo[2,3-d]pyrimidin-4-yl)piperidine-4-carboxamide	C1CN(CCC1(C(=O)NC(CCO)C2=CC=C(C=C2)Cl)N)C3=NC=NC4=C3C=CN4		AKT2
4-amino-N-[(1S)-1-(4-chlorophenyl)-3-hydroxypropyl]-1-(7H-pyrrolo[2,3-d]pyrimidin-4-yl)piperidine-4-carboxamide	C1CN(CCC1(C(=O)NC(CCO)C2=CC=C(C=C2)Cl)N)C3=NC=NC4=C3C=CN4		AKT3
pyridin-4-amine	C1=CN=CC=C1N		KCNC3
pyridin-4-amine	C1=CN=CC=C1N		KCNG1
pyridin-4-amine	C1=CN=CC=C1N		KCNH2
pyridin-4-amine	C1=CN=CC=C1N		KCNH3
pyridin-4-amine	C1=CN=CC=C1N		KCNQ1
pyridin-4-amine	C1=CN=CC=C1N		KCNQ2
pyridin-4-amine	C1=CN=CC=C1N		KCNQ5
pyridin-4-amine	C1=CN=CC=C1N		KCNS3
6-chloro-3-[1-[3-(2-oxo-3H-benzimidazol-1-yl)propyl]piperidin-4-yl]-1H-benzimidazol-2-one	C1CN(CCC1N2C3=C(C=C(C=C3)Cl)NC2=O)CCCN4C5=CC=CC=C5NC4=O		DRD2
6-chloro-3-[1-[3-(2-oxo-3H-benzimidazol-1-yl)propyl]piperidin-4-yl]-1H-benzimidazol-2-one	C1CN(CCC1N2C3=C(C=C(C=C3)Cl)NC2=O)CCCN4C5=CC=CC=C5NC4=O		NGF
6-chloro-3-[1-[3-(2-oxo-3H-benzimidazol-1-yl)propyl]piperidin-4-yl]-1H-benzimidazol-2-one	C1CN(CCC1N2C3=C(C=C(C=C3)Cl)NC2=O)CCCN4C5=CC=CC=C5NC4=O		PIK3CA
6-chloro-3-[1-[3-(2-oxo-3H-benzimidazol-1-yl)propyl]piperidin-4-yl]-1H-benzimidazol-2-one	C1CN(CCC1N2C3=C(C=C(C=C3)Cl)NC2=O)CCCN4C5=CC=CC=C5NC4=O		PIK3CB
6-chloro-3-[1-[3-(2-oxo-3H-benzimidazol-1-yl)propyl]piperidin-4-yl]-1H-benzimidazol-2-one	C1CN(CCC1N2C3=C(C=C(C=C3)Cl)NC2=O)CCCN4C5=CC=CC=C5NC4=O		PIK3CD
6-chloro-3-[1-[3-(2-oxo-3H-benzimidazol-1-yl)propyl]piperidin-4-yl]-1H-benzimidazol-2-one	C1CN(CCC1N2C3=C(C=C(C=C3)Cl)NC2=O)CCCN4C5=CC=CC=C5NC4=O		PIK3CG
3-[1-[[4-(6-phenyl-8H-imidazo[4,5-g]quinoxalin-7-yl)phenyl]methyl]piperidin-4-yl]-1H-benzimidazol-2-one	C1CN(CCC1N2C3=CC=CC=C3NC2=O)CC4=CC=C(C=C4)C5=C(N=C6C=C7C(=NC=N7)C=C6N5)C8=CC=CC=C8		AKT1
3-[1-[[4-(6-phenyl-8H-imidazo[4,5-g]quinoxalin-7-yl)phenyl]methyl]piperidin-4-yl]-1H-benzimidazol-2-one	C1CN(CCC1N2C3=CC=CC=C3NC2=O)CC4=CC=C(C=C4)C5=C(N=C6C=C7C(=NC=N7)C=C6N5)C8=CC=CC=C8		AKT2
3-[1-[[4-(6-phenyl-8H-imidazo[4,5-g]quinoxalin-7-yl)phenyl]methyl]piperidin-4-yl]-1H-benzimidazol-2-one	C1CN(CCC1N2C3=CC=CC=C3NC2=O)CC4=CC=C(C=C4)C5=C(N=C6C=C7C(=NC=N7)C=C6N5)C8=CC=CC=C8		AKT3
3-[1-[4,4-bis(4-fluorophenyl)butyl]piperidin-4-yl]-1H-benzimidazol-2-one	C1CN(CCC1N2C3=CC=CC=C3NC2=O)CCCC(C4=CC=C(C=C4)F)C5=CC=C(C=C5)F		DRD2
3-[1-[4-(4-fluorophenyl)-4-oxobutyl]-3,6-dihydro-2H-pyridin-4-yl]-1H-benzimidazol-2-one	C1CN(CC=C1N2C3=CC=CC=C3NC2=O)CCCC(=O)C4=CC=C(C=C4)F		DRD2
3-[1-[4-(4-fluorophenyl)-4-oxobutyl]piperidin-4-yl]-1H-benzimidazol-2-one	C1CN(CCC1N2C3=CC=CC=C3NC2=O)CCCC(=O)C4=CC=C(C=C4)F		DRD2
N-[(2R)-1-[[(2S)-6-amino-1-oxo-1-(4-pyridin-4-ylpiperazin-1-yl)hexan-2-yl]amino]-3-(3,5-dibromo-4-hydroxyphenyl)-1-oxopropan-2-yl]-4-(2-oxo-1,4-dihydroquinazolin-3-yl)piperidine-1-carboxamide	C1CN(CCC1N2CC3=CC=CC=C3NC2=O)C(=O)NC(CC4=CC(=C(C(=C4)Br)O)Br)C(=O)NC(CCCCN)C(=O)N5CCN(CC5)C6=CC=NC=C6		CALCRL
2-[1-[1-[3-fluoro-2-(trifluoromethyl)pyridine-4-carbonyl]piperidin-4-yl]-3-[4-(7H-pyrrolo[2,3-d]pyrimidin-4-yl)pyrazol-1-yl]azetidin-3-yl]acetonitrile	C1CN(CCC1N2CC(C2)(CC#N)N3C=C(C=N3)C4=C5C=CNC5=NC=N4)C(=O)C6=C(C(=NC=C6)C(F)(F)F)F		JAK1
3-[4-(4-aminopiperidin-1-yl)-3-(3,5-difluorophenyl)quinolin-6-yl]-2-hydroxybenzonitrile	C1CN(CCC1N)C2=C3C=C(C=CC3=NC=C2C4=CC(=CC(=C4)F)F)C5=CC=CC(=C5O)C#N		SSTR2
N-[1-[(3,4-difluorophenyl)methyl]piperidin-4-yl]-6-(trifluoromethyl)pyridazin-3-amine	C1CN(CCC1NC2=NN=C(C=C2)C(F)(F)F)CC3=CC(=C(C=C3)F)F		DRD2
4-[(2,6-dichlorobenzoyl)amino]-N-piperidin-4-yl-1H-pyrazole-5-carboxamide	C1CNCCC1NC(=O)C2=C(C=NN2)NC(=O)C3=C(C=CC=C3Cl)Cl		CDK12
4-[(2,6-dichlorobenzoyl)amino]-N-piperidin-4-yl-1H-pyrazole-5-carboxamide	C1CNCCC1NC(=O)C2=C(C=NN2)NC(=O)C3=C(C=CC=C3Cl)Cl		CDK14
4-[(2,6-dichlorobenzoyl)amino]-N-piperidin-4-yl-1H-pyrazole-5-carboxamide	C1CNCCC1NC(=O)C2=C(C=NN2)NC(=O)C3=C(C=CC=C3Cl)Cl		CDK15
4-[(2,6-dichlorobenzoyl)amino]-N-piperidin-4-yl-1H-pyrazole-5-carboxamide	C1CNCCC1NC(=O)C2=C(C=NN2)NC(=O)C3=C(C=CC=C3Cl)Cl		CDK18
4-[(2,6-dichlorobenzoyl)amino]-N-piperidin-4-yl-1H-pyrazole-5-carboxamide	C1CNCCC1NC(=O)C2=C(C=NN2)NC(=O)C3=C(C=CC=C3Cl)Cl		CDK20
4-[(2,6-dichlorobenzoyl)amino]-N-piperidin-4-yl-1H-pyrazole-5-carboxamide	C1CNCCC1NC(=O)C2=C(C=NN2)NC(=O)C3=C(C=CC=C3Cl)Cl		CDK4
4-[(2,6-dichlorobenzoyl)amino]-N-piperidin-4-yl-1H-pyrazole-5-carboxamide	C1CNCCC1NC(=O)C2=C(C=NN2)NC(=O)C3=C(C=CC=C3Cl)Cl		CDK6
pyridine-3,4-diamine	C1=CN=CC(=C1N)N		KCNC3
pyridine-3,4-diamine	C1=CN=CC(=C1N)N		KCNG1
pyridine-3,4-diamine	C1=CN=CC(=C1N)N		KCNH2
pyridine-3,4-diamine	C1=CN=CC(=C1N)N		KCNH3
pyridine-3,4-diamine	C1=CN=CC(=C1N)N		KCNQ1
pyridine-3,4-diamine	C1=CN=CC(=C1N)N		KCNQ2
pyridine-3,4-diamine	C1=CN=CC(=C1N)N		KCNQ5
pyridine-3,4-diamine	C1=CN=CC(=C1N)N		KCNS3
4-[(4-hydroxypiperidin-1-yl)methyl]-8-oxa-15,16-diazatetracyclo[7.7.1.02,7.013,17]heptadeca-1(16),2(7),3,5,9,11,13(17)-heptaen-14-one	C1CN(CCC1O)CC2=CC3=C(C=C2)OC4=CC=CC5=C4C3=NNC5=O		PARP3
(5S)-9-chloro-5-(4-hydroxyphenyl)-2,3,4,5-tetrahydro-1H-3-benzazepine-7,8-diol	C1CNCC(C2=CC(=C(C(=C21)Cl)O)O)C3=CC=C(C=C3)O		JAK1
(5S)-9-chloro-5-(4-hydroxyphenyl)-2,3,4,5-tetrahydro-1H-3-benzazepine-7,8-diol	C1CNCC(C2=CC(=C(C(=C21)Cl)O)O)C3=CC=C(C=C3)O		JAK2
5-phenyl-2,3,4,5-tetrahydro-1H-3-benzazepine-7,8-diol	C1CNCC(C2=CC(=C(C=C21)O)O)C3=CC=CC=C3		CSF2
5-phenyl-2,3,4,5-tetrahydro-1H-3-benzazepine-7,8-diol	C1CNCC(C2=CC(=C(C=C21)O)O)C3=CC=CC=C3		MAP2K4
5-phenyl-2,3,4,5-tetrahydro-1H-3-benzazepine-7,8-diol	C1CNCC(C2=CC(=C(C=C21)O)O)C3=CC=CC=C3		MAP2K6
4-[4-[2-[[3-(2-aminoethyl)-1H-indol-5-yl]oxy]acetyl]piperazin-1-yl]benzonitrile	C1CN(CCN1C2=CC=C(C=C2)C#N)C(=O)COC3=CC4=C(C=C3)NC=C4CCN		HTR1D
2-amino-N-[5-(5-oxo-7-piperazin-1-yl-[1,3,4]thiadiazolo[3,2-a]pyrimidin-2-yl)pyridin-3-yl]acetamide	C1CN(CCN1)C2=CC(=O)N3C(=N2)SC(=N3)C4=CC(=CN=C4)NC(=O)CN		ITGA2B
2-amino-N-[5-(5-oxo-7-piperazin-1-yl-[1,3,4]thiadiazolo[3,2-a]pyrimidin-2-yl)pyridin-3-yl]acetamide	C1CN(CCN1)C2=CC(=O)N3C(=N2)SC(=N3)C4=CC(=CN=C4)NC(=O)CN		ITGB3
6-(6-aminopyrazin-2-yl)-N-[4-[4-(oxetan-3-yl)piperazin-1-yl]phenyl]imidazo[1,2-a]pyrazin-8-amine	C1CN(CCN1C2COC2)C3=CC=C(C=C3)NC4=NC(=CN5C4=NC=C5)C6=CN=CC(=N6)N		SYK
2-piperazin-1-ylquinoline	C1CN(CCN1)C2=NC3=CC=CC=C3C=C2		MAP3K12
2-piperazin-1-ylquinoline	C1CN(CCN1)C2=NC3=CC=CC=C3C=C2		MAP3K13
2-piperazin-1-ylquinoline	C1CN(CCN1)C2=NC3=CC=CC=C3C=C2		MAP3K9
8-chloro-6-piperazin-1-ylbenzo[b][1,4]benzoxazepine	C1CN(CCN1)C2=NC3=CC=CC=C3OC4=C2C=C(C=C4)Cl		DRD2
N-(1,3-benzodioxol-5-ylmethyl)-4-([1]benzofuro[3,2-d]pyrimidin-4-yl)piperazine-1-carbothioamide	C1CN(CCN1C2=NC=NC3=C2OC4=CC=CC=C43)C(=S)NCC5=CC6=C(C=C5)OCO6		FLT3
N-(1,3-benzodioxol-5-ylmethyl)-4-([1]benzofuro[3,2-d]pyrimidin-4-yl)piperazine-1-carbothioamide	C1CN(CCN1C2=NC=NC3=C2OC4=CC=CC=C43)C(=S)NCC5=CC6=C(C=C5)OCO6		KIT
N-(1,3-benzodioxol-5-ylmethyl)-4-([1]benzofuro[3,2-d]pyrimidin-4-yl)piperazine-1-carbothioamide	C1CN(CCN1C2=NC=NC3=C2OC4=CC=CC=C43)C(=S)NCC5=CC6=C(C=C5)OCO6		MET
N-(1,3-benzodioxol-5-ylmethyl)-4-([1]benzofuro[3,2-d]pyrimidin-4-yl)piperazine-1-carbothioamide	C1CN(CCN1C2=NC=NC3=C2OC4=CC=CC=C43)C(=S)NCC5=CC6=C(C=C5)OCO6		PDGFRA
N-(1,3-benzodioxol-5-ylmethyl)-4-([1]benzofuro[3,2-d]pyrimidin-4-yl)piperazine-1-carbothioamide	C1CN(CCN1C2=NC=NC3=C2OC4=CC=CC=C43)C(=S)NCC5=CC6=C(C=C5)OCO6		PDGFRB
N-(1,3-benzodioxol-5-ylmethyl)-4-([1]benzofuro[3,2-d]pyrimidin-4-yl)piperazine-1-carbothioamide	C1CN(CCN1C2=NC=NC3=C2OC4=CC=CC=C43)C(=S)NCC5=CC6=C(C=C5)OCO6		RET
N-(4-chloropyridin-3-yl)-4-[(2,2-difluoro-1,3-benzodioxol-5-yl)methyl]piperazine-1-carboxamide	C1CN(CCN1CC2=CC3=C(C=C2)OC(O3)(F)F)C(=O)NC4=C(C=CN=C4)Cl		FAAH
7-[4-[(3-phenylphenyl)methyl]piperazin-1-yl]-3H-1,3-benzoxazol-2-one	C1CN(CCN1CC2=CC(=CC=C2)C3=CC=CC=C3)C4=CC=CC5=C4OC(=O)N5		DRD2
2-[(2R)-3-(4-benzhydrylpiperazin-1-yl)-2-(1H-indole-2-carbonylamino)-3-oxopropyl]sulfanylpyridine-3-carboxylic acid	C1CN(CCN1C(C2=CC=CC=C2)C3=CC=CC=C3)C(=O)C(CSC4=C(C=CC=N4)C(=O)O)NC(=O)C5=CC6=CC=CC=C6N5		CSF1R
2-[(2R)-3-(4-benzhydrylpiperazin-1-yl)-2-(1H-indole-2-carbonylamino)-3-oxopropyl]sulfanylpyridine-3-carboxylic acid	C1CN(CCN1C(C2=CC=CC=C2)C3=CC=CC=C3)C(=O)C(CSC4=C(C=CC=N4)C(=O)O)NC(=O)C5=CC6=CC=CC=C6N5		FGFR1
2-[(2R)-3-(4-benzhydrylpiperazin-1-yl)-2-(1H-indole-2-carbonylamino)-3-oxopropyl]sulfanylpyridine-3-carboxylic acid	C1CN(CCN1C(C2=CC=CC=C2)C3=CC=CC=C3)C(=O)C(CSC4=C(C=CC=N4)C(=O)O)NC(=O)C5=CC6=CC=CC=C6N5		FGFR2
2-[(2R)-3-(4-benzhydrylpiperazin-1-yl)-2-(1H-indole-2-carbonylamino)-3-oxopropyl]sulfanylpyridine-3-carboxylic acid	C1CN(CCN1C(C2=CC=CC=C2)C3=CC=CC=C3)C(=O)C(CSC4=C(C=CC=N4)C(=O)O)NC(=O)C5=CC6=CC=CC=C6N5		FGFR3
2-[(2R)-3-(4-benzhydrylpiperazin-1-yl)-2-(1H-indole-2-carbonylamino)-3-oxopropyl]sulfanylpyridine-3-carboxylic acid	C1CN(CCN1C(C2=CC=CC=C2)C3=CC=CC=C3)C(=O)C(CSC4=C(C=CC=N4)C(=O)O)NC(=O)C5=CC6=CC=CC=C6N5		FGFR4
2-[(2R)-3-(4-benzhydrylpiperazin-1-yl)-2-(1H-indole-2-carbonylamino)-3-oxopropyl]sulfanylpyridine-3-carboxylic acid	C1CN(CCN1C(C2=CC=CC=C2)C3=CC=CC=C3)C(=O)C(CSC4=C(C=CC=N4)C(=O)O)NC(=O)C5=CC6=CC=CC=C6N5		FLT1
2-[(2R)-3-(4-benzhydrylpiperazin-1-yl)-2-(1H-indole-2-carbonylamino)-3-oxopropyl]sulfanylpyridine-3-carboxylic acid	C1CN(CCN1C(C2=CC=CC=C2)C3=CC=CC=C3)C(=O)C(CSC4=C(C=CC=N4)C(=O)O)NC(=O)C5=CC6=CC=CC=C6N5		FLT3
2-[(2R)-3-(4-benzhydrylpiperazin-1-yl)-2-(1H-indole-2-carbonylamino)-3-oxopropyl]sulfanylpyridine-3-carboxylic acid	C1CN(CCN1C(C2=CC=CC=C2)C3=CC=CC=C3)C(=O)C(CSC4=C(C=CC=N4)C(=O)O)NC(=O)C5=CC6=CC=CC=C6N5		FLT4
2-[(2R)-3-(4-benzhydrylpiperazin-1-yl)-2-(1H-indole-2-carbonylamino)-3-oxopropyl]sulfanylpyridine-3-carboxylic acid	C1CN(CCN1C(C2=CC=CC=C2)C3=CC=CC=C3)C(=O)C(CSC4=C(C=CC=N4)C(=O)O)NC(=O)C5=CC6=CC=CC=C6N5		KDR
2-[(2R)-3-(4-benzhydrylpiperazin-1-yl)-2-(1H-indole-2-carbonylamino)-3-oxopropyl]sulfanylpyridine-3-carboxylic acid	C1CN(CCN1C(C2=CC=CC=C2)C3=CC=CC=C3)C(=O)C(CSC4=C(C=CC=N4)C(=O)O)NC(=O)C5=CC6=CC=CC=C6N5		KIT
1-(2,3-dihydro-1,4-benzodioxin-5-yl)-4-[[5-(4-fluorophenyl)pyridin-3-yl]methyl]piperazine	C1CN(CCN1CC2=CC(=CN=C2)C3=CC=C(C=C3)F)C4=C5C(=CC=C4)OCCO5		DRD2
2-[[4-(4-chlorophenyl)piperazin-1-yl]methyl]pyrazolo[1,5-a]pyridine	C1CN(CCN1CC2=NN3C=CC=CC3=C2)C4=CC=C(C=C4)Cl		MAPK1
5-[2-[4-(1,2-benzothiazol-3-yl)piperazin-1-yl]ethyl]-6-chloro-1,3-dihydroindol-2-one	C1CN(CCN1CCC2=C(C=C3C(=C2)CC(=O)N3)Cl)C4=NSC5=CC=CC=C54		DRD2
2-[4-[(3Z)-3-[2-(trifluoromethyl)thioxanthen-9-ylidene]propyl]piperazin-1-yl]ethanol	C1CN(CCN1CCC=C2C3=CC=CC=C3SC4=C2C=C(C=C4)C(F)(F)F)CCO		MET
1-benzhydryl-4-[(E)-3-phenylprop-2-enyl]piperazine	C1CN(CCN1CC=CC2=CC=CC=C2)C(C3=CC=CC=C3)C4=CC=CC=C4		CACNA1C
1-benzhydryl-4-[(E)-3-phenylprop-2-enyl]piperazine	C1CN(CCN1CC=CC2=CC=CC=C2)C(C3=CC=CC=C3)C4=CC=CC=C4		CACNA1D
1-benzhydryl-4-[(E)-3-phenylprop-2-enyl]piperazine	C1CN(CCN1CC=CC2=CC=CC=C2)C(C3=CC=CC=C3)C4=CC=CC=C4		HRH1
7-[4-[4-(1-benzothiophen-4-yl)piperazin-1-yl]butoxy]-1H-quinolin-2-one	C1CN(CCN1CCCCOC2=CC3=C(C=C2)C=CC(=O)N3)C4=C5C=CSC5=CC=C4		DRD2
3-[3-(4-benzhydrylpiperazin-1-yl)propyl]-1H-benzimidazol-2-one	C1CN(CCN1CCCN2C3=CC=CC=C3NC2=O)C(C4=CC=CC=C4)C5=CC=CC=C5		HRH1
2-[4-[3-(2-chlorophenothiazin-10-yl)propyl]piperazin-1-yl]ethanol	C1CN(CCN1CCCN2C3=CC=CC=C3SC4=C2C=C(C=C4)Cl)CCO		DRD2
(2R)-1-[4-[(2R,4S)-3,3-difluoro-11-tetracyclo[10.4.0.02,4.05,10]hexadeca-1(16),5,7,9,12,14-hexaenyl]piperazin-1-yl]-3-quinolin-5-yloxypropan-2-ol	C1CN(CCN1CC(COC2=CC=CC3=C2C=CC=N3)O)C4C5=CC=CC=C5C6C(C6(F)F)C7=CC=CC=C47		ABCB1
2-[2-[4-[(R)-(4-chlorophenyl)-phenylmethyl]piperazin-1-yl]ethoxy]acetic acid	C1CN(CCN1CCOCC(=O)O)C(C2=CC=CC=C2)C3=CC=C(C=C3)Cl		HRH1
2-[4-[3-(trifluoromethyl)phenyl]piperazin-1-yl]ethyl 2-[[7-(trifluoromethyl)quinolin-4-yl]amino]benzoate	C1CN(CCN1CCOC(=O)C2=CC=CC=C2NC3=C4C=CC(=CC4=NC=C3)C(F)(F)F)C5=CC=CC(=C5)C(F)(F)F		PTGDS
[4-[(E)-2-(1H-indazol-3-yl)ethenyl]phenyl]-piperazin-1-ylmethanone	C1CN(CCN1)C(=O)C2=CC=C(C=C2)C=CC3=NNC4=CC=CC=C43		ABL1
[4-[(E)-2-(1H-indazol-3-yl)ethenyl]phenyl]-piperazin-1-ylmethanone	C1CN(CCN1)C(=O)C2=CC=C(C=C2)C=CC3=NNC4=CC=CC=C43		FLT3
pyrazine-2-carboxamide	C1=CN=C(C=N1)C(=O)N		FAS
(Z)-3-[3-[3,5-bis(trifluoromethyl)phenyl]-1,2,4-triazol-1-yl]-N'-pyrazin-2-ylprop-2-enehydrazide	C1=CN=C(C=N1)NNC(=O)C=CN2C=NC(=N2)C3=CC(=CC(=C3)C(F)(F)F)C(F)(F)F		XPO1
1-[[4-(1,4,8,11-tetrazacyclotetradec-1-ylmethyl)phenyl]methyl]-1,4,8,11-tetrazacyclotetradecane	C1CNCCNCCCN(CCNC1)CC2=CC=C(C=C2)CN3CCCNCCNCCCNCC3		CXCR4
5-fluoro-2-oxo-1H-pyrazine-3-carboxamide	C1=C(N=C(C(=O)N1)C(=O)N)F		PBRM1
2-(2,3-dihydro-1,4-benzodioxin-3-yl)-4,5-dihydro-1H-imidazole	C1CN=C(N1)C2COC3=CC=CC=C3O2		ADRA2C
5-bromo-N-(4,5-dihydro-1H-imidazol-2-yl)quinoxalin-6-amine	C1CN=C(N1)NC2=C(C3=NC=CN=C3C=C2)Br		ADRA2C
N-[[4-[(pyrimidin-2-ylamino)methyl]phenyl]methyl]pyrimidin-2-amine	C1=CN=C(N=C1)NCC2=CC=C(C=C2)CNC3=NC=CC=N3		CXCR4
(4E)-7-chloro-4-(2-oxo-1-phenylpyrrolidin-3-ylidene)-2,3-dihydro-1H-quinoline-2-carboxylic acid	C1CN(C(=O)C1=C2CC(NC3=C2C=CC(=C3)Cl)C(=O)O)C4=CC=CC=C4		GRIN2A
(4E)-7-chloro-4-(2-oxo-1-phenylpyrrolidin-3-ylidene)-2,3-dihydro-1H-quinoline-2-carboxylic acid	C1CN(C(=O)C1=C2CC(NC3=C2C=CC(=C3)Cl)C(=O)O)C4=CC=CC=C4		GRIN2D
4-amino-1-[(2R,4R,5R)-3,3-difluoro-4-hydroxy-5-(hydroxymethyl)oxolan-2-yl]pyrimidin-2-one	C1=CN(C(=O)N=C1N)C2C(C(C(O2)CO)O)(F)F		POLD1
4-amino-1-[(2R,4R,5R)-3,3-difluoro-4-hydroxy-5-(hydroxymethyl)oxolan-2-yl]pyrimidin-2-one	C1=CN(C(=O)N=C1N)C2C(C(C(O2)CO)O)(F)F		POLD4
4-amino-1-[(2R,4R,5R)-3,3-difluoro-4-hydroxy-5-(hydroxymethyl)oxolan-2-yl]pyrimidin-2-one	C1=CN(C(=O)N=C1N)C2C(C(C(O2)CO)O)(F)F		POLE
4-amino-1-[(2R,4R,5R)-3,3-difluoro-4-hydroxy-5-(hydroxymethyl)oxolan-2-yl]pyrimidin-2-one	C1=CN(C(=O)N=C1N)C2C(C(C(O2)CO)O)(F)F		RRM2
4-amino-1-[(2R,3S,4S,5R)-3,4-dihydroxy-5-(hydroxymethyl)oxolan-2-yl]pyrimidin-2-one	C1=CN(C(=O)N=C1N)C2C(C(C(O2)CO)O)O		POLD1
4-amino-1-[(2R,3S,4S,5R)-3,4-dihydroxy-5-(hydroxymethyl)oxolan-2-yl]pyrimidin-2-one	C1=CN(C(=O)N=C1N)C2C(C(C(O2)CO)O)O		POLD4
4-amino-1-[(2R,3S,4S,5R)-3,4-dihydroxy-5-(hydroxymethyl)oxolan-2-yl]pyrimidin-2-one	C1=CN(C(=O)N=C1N)C2C(C(C(O2)CO)O)O		POLE
(2S)-2-amino-4-[[1-[(2R,3S,4S,5R)-3,4-dihydroxy-5-(hydroxymethyl)oxolan-2-yl]-2-oxopyrimidin-4-yl]amino]-4-oxobutanoic acid	C1=CN(C(=O)N=C1NC(=O)CC(C(=O)O)N)C2C(C(C(O2)CO)O)O		POLD1
(2S)-2-amino-4-[[1-[(2R,3S,4S,5R)-3,4-dihydroxy-5-(hydroxymethyl)oxolan-2-yl]-2-oxopyrimidin-4-yl]amino]-4-oxobutanoic acid	C1=CN(C(=O)N=C1NC(=O)CC(C(=O)O)N)C2C(C(C(O2)CO)O)O		POLD4
(2S)-2-amino-4-[[1-[(2R,3S,4S,5R)-3,4-dihydroxy-5-(hydroxymethyl)oxolan-2-yl]-2-oxopyrimidin-4-yl]amino]-4-oxobutanoic acid	C1=CN(C(=O)N=C1NC(=O)CC(C(=O)O)N)C2C(C(C(O2)CO)O)O		POLE
(4R)-1-[(2R,4R,5R)-3,3-difluoro-4-hydroxy-5-(hydroxymethyl)oxolan-2-yl]-4-hydroxy-1,3-diazinan-2-one	C1CN(C(=O)NC1O)C2C(C(C(O2)CO)O)(F)F		CDA
5-bromo-2,6-di(pyrazol-1-yl)pyrimidin-4-amine	C1=CN(N=C1)C2=NC(=NC(=C2Br)N)N3C=CC=N3		ADORA2A
(4S)-6-fluorospiro[2,3-dihydrochromene-4,5'-imidazolidine]-2',4'-dione	C1COC2=C(C13C(=O)NC(=O)N3)C=C(C=C2)F		AKR1B1
(2R,3S,4R,5R)-2-(hydroxymethyl)-5-[6-[[(3R)-oxolan-3-yl]amino]purin-9-yl]oxolane-3,4-diol	C1COCC1NC2=C3C(=NC=N2)N(C=N3)C4C(C(C(O4)CO)O)O		ADORA1
4-[[4-(4-chlorophenoxy)phenyl]sulfonylmethyl]-N-hydroxyoxane-4-carboxamide	C1COCCC1(CS(=O)(=O)C2=CC=C(C=C2)OC3=CC=C(C=C3)Cl)C(=O)NO		MMP13
4-[[4-(4-chlorophenoxy)phenyl]sulfonylmethyl]-N-hydroxyoxane-4-carboxamide	C1COCCC1(CS(=O)(=O)C2=CC=C(C=C2)OC3=CC=C(C=C3)Cl)C(=O)NO		MMP14
4-[[4-(4-chlorophenoxy)phenyl]sulfonylmethyl]-N-hydroxyoxane-4-carboxamide	C1COCCC1(CS(=O)(=O)C2=CC=C(C=C2)OC3=CC=C(C=C3)Cl)C(=O)NO		MMP2
4-[[4-(4-chlorophenoxy)phenyl]sulfonylmethyl]-N-hydroxyoxane-4-carboxamide	C1COCCC1(CS(=O)(=O)C2=CC=C(C=C2)OC3=CC=C(C=C3)Cl)C(=O)NO		MMP3
4-[[4-(4-chlorophenoxy)phenyl]sulfonylmethyl]-N-hydroxyoxane-4-carboxamide	C1COCCC1(CS(=O)(=O)C2=CC=C(C=C2)OC3=CC=C(C=C3)Cl)C(=O)NO		MMP8
4-[[4-(4-chlorophenoxy)phenyl]sulfonylmethyl]-N-hydroxyoxane-4-carboxamide	C1COCCC1(CS(=O)(=O)C2=CC=C(C=C2)OC3=CC=C(C=C3)Cl)C(=O)NO		MMP9
1-(oxan-4-yl)-6-(pyridin-2-ylmethyl)-5H-pyrazolo[3,4-d]pyrimidin-4-one	C1COCCC1N2C3=C(C=N2)C(=O)NC(=N3)CC4=CC=CC=N4		PDE9A
2,6-difluoro-4-[4-(4-morpholin-4-ylphenyl)pyridin-3-yl]phenol	C1COCCN1C2=CC=C(C=C2)C3=C(C=NC=C3)C4=CC(=C(C(=C4)F)O)F		RPS6KA1
2,6-difluoro-4-[4-(4-morpholin-4-ylphenyl)pyridin-3-yl]phenol	C1COCCN1C2=CC=C(C=C2)C3=C(C=NC=C3)C4=CC(=C(C(=C4)F)O)F		RPS6KA2
4-(3-fluoro-5-morpholin-4-ylphenyl)-N-[4-(3-morpholin-4-yl-1,2,4-triazol-1-yl)phenyl]pyrimidin-2-amine	C1COCCN1C2=CC(=CC(=C2)C3=NC(=NC=C3)NC4=CC=C(C=C4)N5C=NC(=N5)N6CCOCC6)F		MAPK10
N-(cyanomethyl)-4-[2-(4-morpholin-4-ylanilino)pyrimidin-4-yl]benzamide	C1COCCN1C2=CC=C(C=C2)NC3=NC=CC(=N3)C4=CC=C(C=C4)C(=O)NCC#N		EGFR
N-(cyanomethyl)-4-[2-(4-morpholin-4-ylanilino)pyrimidin-4-yl]benzamide	C1COCCN1C2=CC=C(C=C2)NC3=NC=CC(=N3)C4=CC=C(C=C4)C(=O)NCC#N		ERBB2
N-(cyanomethyl)-4-[2-(4-morpholin-4-ylanilino)pyrimidin-4-yl]benzamide	C1COCCN1C2=CC=C(C=C2)NC3=NC=CC(=N3)C4=CC=C(C=C4)C(=O)NCC#N		ERBB3
N-(cyanomethyl)-4-[2-(4-morpholin-4-ylanilino)pyrimidin-4-yl]benzamide	C1COCCN1C2=CC=C(C=C2)NC3=NC=CC(=N3)C4=CC=C(C=C4)C(=O)NCC#N		JAK1
N-(cyanomethyl)-4-[2-(4-morpholin-4-ylanilino)pyrimidin-4-yl]benzamide	C1COCCN1C2=CC=C(C=C2)NC3=NC=CC(=N3)C4=CC=C(C=C4)C(=O)NCC#N		JAK2
6-(1H-indazol-6-yl)-N-(4-morpholin-4-ylphenyl)imidazo[1,2-a]pyrazin-8-amine	C1COCCN1C2=CC=C(C=C2)NC3=NC(=CN4C3=NC=C4)C5=CC6=C(C=C5)C=NN6		SYK
2-morpholin-4-yl-6-thianthren-1-ylpyran-4-one	C1COCCN1C2=CC(=O)C=C(O2)C3=C4C(=CC=C3)SC5=CC=CC=C5S4		ATM
3-(6-morpholin-4-yl-8-oxa-3,5,10-triazatricyclo[7.4.0.02,7]trideca-1(9),2(7),3,5,10,12-hexaen-4-yl)phenol	C1COCCN1C2=NC(=NC3=C2OC4=C3C=CC=N4)C5=CC(=CC=C5)O		HIPK2
3-(6-morpholin-4-yl-8-oxa-3,5,10-triazatricyclo[7.4.0.02,7]trideca-1(9),2(7),3,5,10,12-hexaen-4-yl)phenol	C1COCCN1C2=NC(=NC3=C2OC4=C3C=CC=N4)C5=CC(=CC=C5)O		MTOR
3-(6-morpholin-4-yl-8-oxa-3,5,10-triazatricyclo[7.4.0.02,7]trideca-1(9),2(7),3,5,10,12-hexaen-4-yl)phenol	C1COCCN1C2=NC(=NC3=C2OC4=C3C=CC=N4)C5=CC(=CC=C5)O		PIK3C2B
3-(6-morpholin-4-yl-8-oxa-3,5,10-triazatricyclo[7.4.0.02,7]trideca-1(9),2(7),3,5,10,12-hexaen-4-yl)phenol	C1COCCN1C2=NC(=NC3=C2OC4=C3C=CC=N4)C5=CC(=CC=C5)O		PIK3CA
3-(6-morpholin-4-yl-8-oxa-3,5,10-triazatricyclo[7.4.0.02,7]trideca-1(9),2(7),3,5,10,12-hexaen-4-yl)phenol	C1COCCN1C2=NC(=NC3=C2OC4=C3C=CC=N4)C5=CC(=CC=C5)O		PIK3CB
3-(6-morpholin-4-yl-8-oxa-3,5,10-triazatricyclo[7.4.0.02,7]trideca-1(9),2(7),3,5,10,12-hexaen-4-yl)phenol	C1COCCN1C2=NC(=NC3=C2OC4=C3C=CC=N4)C5=CC(=CC=C5)O		PIK3CD
3-(6-morpholin-4-yl-8-oxa-3,5,10-triazatricyclo[7.4.0.02,7]trideca-1(9),2(7),3,5,10,12-hexaen-4-yl)phenol	C1COCCN1C2=NC(=NC3=C2OC4=C3C=CC=N4)C5=CC(=CC=C5)O		PIK3CG
3-(6-morpholin-4-yl-8-oxa-3,5,10-triazatricyclo[7.4.0.02,7]trideca-1(9),2(7),3,5,10,12-hexaen-4-yl)phenol	C1COCCN1C2=NC(=NC3=C2OC4=C3C=CC=N4)C5=CC(=CC=C5)O		PIK3R1
3-(6-morpholin-4-yl-8-oxa-3,5,10-triazatricyclo[7.4.0.02,7]trideca-1(9),2(7),3,5,10,12-hexaen-4-yl)phenol	C1COCCN1C2=NC(=NC3=C2OC4=C3C=CC=N4)C5=CC(=CC=C5)O		PIK3R3
5-(2,6-dimorpholin-4-ylpyrimidin-4-yl)-4-(trifluoromethyl)pyridin-2-amine	C1COCCN1C2=NC(=NC(=C2)C3=CN=C(C=C3C(F)(F)F)N)N4CCOCC4		PIK3C2B
5-(2,6-dimorpholin-4-ylpyrimidin-4-yl)-4-(trifluoromethyl)pyridin-2-amine	C1COCCN1C2=NC(=NC(=C2)C3=CN=C(C=C3C(F)(F)F)N)N4CCOCC4		PIK3CA
5-(2,6-dimorpholin-4-ylpyrimidin-4-yl)-4-(trifluoromethyl)pyridin-2-amine	C1COCCN1C2=NC(=NC(=C2)C3=CN=C(C=C3C(F)(F)F)N)N4CCOCC4		PIK3CB
5-(2,6-dimorpholin-4-ylpyrimidin-4-yl)-4-(trifluoromethyl)pyridin-2-amine	C1COCCN1C2=NC(=NC(=C2)C3=CN=C(C=C3C(F)(F)F)N)N4CCOCC4		PIK3CD
5-(2,6-dimorpholin-4-ylpyrimidin-4-yl)-4-(trifluoromethyl)pyridin-2-amine	C1COCCN1C2=NC(=NC(=C2)C3=CN=C(C=C3C(F)(F)F)N)N4CCOCC4		PIK3CG
5-(2,6-dimorpholin-4-ylpyrimidin-4-yl)-4-(trifluoromethyl)pyridin-2-amine	C1COCCN1C2=NC(=NC(=C2)C3=CN=C(C=C3C(F)(F)F)N)N4CCOCC4		PIK3R1
5-(2,6-dimorpholin-4-ylpyrimidin-4-yl)-4-(trifluoromethyl)pyridin-2-amine	C1COCCN1C2=NC(=NC(=C2)C3=CN=C(C=C3C(F)(F)F)N)N4CCOCC4		PIK3R3
2-(6-morpholin-4-ylpyrimidin-4-yl)-4-(triazol-1-yl)-1H-pyrazol-3-one	C1COCCN1C2=NC=NC(=C2)N3C(=O)C(=CN3)N4C=CN=N4		EGLN3
4-[4-[2-(difluoromethyl)benzimidazol-1-yl]-6-morpholin-4-yl-1,3,5-triazin-2-yl]morpholine	C1COCCN1C2=NC(=NC(=N2)N3C4=CC=CC=C4N=C3C(F)F)N5CCOCC5		PIK3CA
4-[4-[2-(difluoromethyl)benzimidazol-1-yl]-6-morpholin-4-yl-1,3,5-triazin-2-yl]morpholine	C1COCCN1C2=NC(=NC(=N2)N3C4=CC=CC=C4N=C3C(F)F)N5CCOCC5		PIK3CB
4-[4-[2-(difluoromethyl)benzimidazol-1-yl]-6-morpholin-4-yl-1,3,5-triazin-2-yl]morpholine	C1COCCN1C2=NC(=NC(=N2)N3C4=CC=CC=C4N=C3C(F)F)N5CCOCC5		PIK3CD
4-[4-[2-(difluoromethyl)benzimidazol-1-yl]-6-morpholin-4-yl-1,3,5-triazin-2-yl]morpholine	C1COCCN1C2=NC(=NC(=N2)N3C4=CC=CC=C4N=C3C(F)F)N5CCOCC5		PIK3CG
4-[4-[2-(difluoromethyl)benzimidazol-1-yl]-6-morpholin-4-yl-1,3,5-triazin-2-yl]morpholine	C1COCCN1C2=NC(=NC(=N2)N3C4=CC=CC=C4N=C3C(F)F)N5CCOCC5		PIK3R1
4-[4-[2-(difluoromethyl)benzimidazol-1-yl]-6-morpholin-4-yl-1,3,5-triazin-2-yl]morpholine	C1COCCN1C2=NC(=NC(=N2)N3C4=CC=CC=C4N=C3C(F)F)N5CCOCC5		PIK3R3
2-(1,3-benzothiazol-2-yl)-2-[2-[[4-(morpholin-4-ylmethyl)phenyl]methoxy]pyrimidin-4-yl]acetonitrile	C1COCCN1CC2=CC=C(C=C2)COC3=NC=CC(=N3)C(C#N)C4=NC5=CC=CC=C5S4		MAPK10
4-chloro-N-(2-morpholin-4-ylethyl)benzamide	C1COCCN1CCNC(=O)C2=CC=C(C=C2)Cl		MAOA
1-[6-[[6-(4-fluorophenyl)-[1,2,4]triazolo[4,3-b]pyridazin-3-yl]sulfanyl]-1,3-benzothiazol-2-yl]-3-(2-morpholin-4-ylethyl)urea	C1COCCN1CCNC(=O)NC2=NC3=C(S2)C=C(C=C3)SC4=NN=C5N4N=C(C=C5)C6=CC=C(C=C6)F		MET
N-benzyl-2-[5-[4-(2-morpholin-4-ylethoxy)phenyl]pyridin-2-yl]acetamide	C1COCCN1CCOC2=CC=C(C=C2)C3=CN=C(C=C3)CC(=O)NCC4=CC=CC=C4		SRC
[6-(2-amino-1,3-benzoxazol-5-yl)imidazo[1,2-a]pyridin-3-yl]-morpholin-4-ylmethanone	C1COCCN1C(=O)C2=CN=C3N2C=C(C=C3)C4=CC5=C(C=C4)OC(=N5)N		PIK3CA
5-chloro-2-[(5-chlorothiophen-2-yl)sulfonylamino]-N-(4-morpholin-4-ylsulfonylphenyl)benzamide	C1COCCN1S(=O)(=O)C2=CC=C(C=C2)NC(=O)C3=C(C=CC(=C3)Cl)NS(=O)(=O)C4=CC=C(S4)Cl		GUCY1A1
5-chloro-2-[(5-chlorothiophen-2-yl)sulfonylamino]-N-(4-morpholin-4-ylsulfonylphenyl)benzamide	C1COCCN1S(=O)(=O)C2=CC=C(C=C2)NC(=O)C3=C(C=CC(=C3)Cl)NS(=O)(=O)C4=CC=C(S4)Cl		GUCY1B1
4-amino-1-[(2S)-2-(hydroxymethyl)-1,3-dioxolan-4-yl]pyrimidin-2-one	C1C(OC(O1)CO)N2C=CC(=NC2=O)N		POLD1
4-amino-1-[(2S)-2-(hydroxymethyl)-1,3-dioxolan-4-yl]pyrimidin-2-one	C1C(OC(O1)CO)N2C=CC(=NC2=O)N		POLD4
4-amino-1-[(2S)-2-(hydroxymethyl)-1,3-dioxolan-4-yl]pyrimidin-2-one	C1C(OC(O1)CO)N2C=CC(=NC2=O)N		POLE
4-amino-1-[(2R,5S)-2-(hydroxymethyl)-1,3-oxathiolan-5-yl]pyrimidin-2-one	C1C(OC(S1)CO)N2C=CC(=NC2=O)N		OCA2
7-bromo-5-pyridin-2-yl-1,3-dihydro-1,4-benzodiazepin-2-one	C1C(=O)NC2=C(C=C(C=C2)Br)C(=N1)C3=CC=CC=N3		GABRA2
7-chloro-5-phenyl-1-(2,2,2-trifluoroethyl)-3H-1,4-benzodiazepin-2-one	C1C(=O)N(C2=C(C=C(C=C2)Cl)C(=N1)C3=CC=CC=C3)CC(F)(F)F		GABRA2
7-chloro-5-phenyl-1-(2,2,2-trifluoroethyl)-3H-1,4-benzodiazepin-2-one	C1C(=O)N(C2=C(C=C(C=C2)Cl)C(=N1)C3=CC=CC=C3)CC(F)(F)F		GABRA3
7-chloro-5-phenyl-1-(2,2,2-trifluoroethyl)-3H-1,4-benzodiazepin-2-one	C1C(=O)N(C2=C(C=C(C=C2)Cl)C(=N1)C3=CC=CC=C3)CC(F)(F)F		GABRB3
7-chloro-5-phenyl-1-(2,2,2-trifluoroethyl)-3H-1,4-benzodiazepin-2-one	C1C(=O)N(C2=C(C=C(C=C2)Cl)C(=N1)C3=CC=CC=C3)CC(F)(F)F		GABRE
7-chloro-5-phenyl-1-(2,2,2-trifluoroethyl)-3H-1,4-benzodiazepin-2-one	C1C(=O)N(C2=C(C=C(C=C2)Cl)C(=N1)C3=CC=CC=C3)CC(F)(F)F		GABRP
9-hydroxy-3,4-dihydro-2H-[1]benzothiolo[2,3-f][1,4]thiazepin-5-one	C1CSC2=C(C(=O)N1)SC3=C2C=C(C=C3)O		PRKD1
5-[(E)-2-thiophen-2-ylethenyl]-1H-pyrazole	C1=CSC(=C1)C=CC2=CC=NN2		MET
5-chloro-N-[(2S)-4,4,4-trifluoro-1-hydroxy-3-(trifluoromethyl)butan-2-yl]thiophene-2-sulfonamide	C1=C(SC(=C1)Cl)S(=O)(=O)NC(CO)C(C(F)(F)F)C(F)(F)F		APH1B
5-chloro-N-[(2S)-4,4,4-trifluoro-1-hydroxy-3-(trifluoromethyl)butan-2-yl]thiophene-2-sulfonamide	C1=C(SC(=C1)Cl)S(=O)(=O)NC(CO)C(C(F)(F)F)C(F)(F)F		PSEN2
7-chloro-5-(2-fluorophenyl)-1-(2,2,2-trifluoroethyl)-3H-1,4-benzodiazepine-2-thione	C1C(=S)N(C2=C(C=C(C=C2)Cl)C(=N1)C3=CC=CC=C3F)CC(F)(F)F		GABRA2
7-chloro-5-(2-fluorophenyl)-1-(2,2,2-trifluoroethyl)-3H-1,4-benzodiazepine-2-thione	C1C(=S)N(C2=C(C=C(C=C2)Cl)C(=N1)C3=CC=CC=C3F)CC(F)(F)F		GABRA3
7-chloro-5-(2-fluorophenyl)-1-(2,2,2-trifluoroethyl)-3H-1,4-benzodiazepine-2-thione	C1C(=S)N(C2=C(C=C(C=C2)Cl)C(=N1)C3=CC=CC=C3F)CC(F)(F)F		GABRB3
7-chloro-5-(2-fluorophenyl)-1-(2,2,2-trifluoroethyl)-3H-1,4-benzodiazepine-2-thione	C1C(=S)N(C2=C(C=C(C=C2)Cl)C(=N1)C3=CC=CC=C3F)CC(F)(F)F		GABRE
7-chloro-5-(2-fluorophenyl)-1-(2,2,2-trifluoroethyl)-3H-1,4-benzodiazepine-2-thione	C1C(=S)N(C2=C(C=C(C=C2)Cl)C(=N1)C3=CC=CC=C3F)CC(F)(F)F		GABRP
(2R,3R,4S,5R)-5-(6-amino-2-chloropurin-9-yl)-4-fluoro-2-(hydroxymethyl)oxolan-3-ol	C1=NC2=C(N=C(N=C2N1C3C(C(C(O3)CO)O)F)Cl)N		FLT3
(2R,3R,4S,5R)-5-(6-amino-2-chloropurin-9-yl)-4-fluoro-2-(hydroxymethyl)oxolan-3-ol	C1=NC2=C(N=C(N=C2N1C3C(C(C(O3)CO)O)F)Cl)N		POLD1
(2R,3R,4S,5R)-5-(6-amino-2-chloropurin-9-yl)-4-fluoro-2-(hydroxymethyl)oxolan-3-ol	C1=NC2=C(N=C(N=C2N1C3C(C(C(O3)CO)O)F)Cl)N		POLD4
(2R,3R,4S,5R)-5-(6-amino-2-chloropurin-9-yl)-4-fluoro-2-(hydroxymethyl)oxolan-3-ol	C1=NC2=C(N=C(N=C2N1C3C(C(C(O3)CO)O)F)Cl)N		POLE
(2R,3R,4S,5R)-5-(6-amino-2-chloropurin-9-yl)-4-fluoro-2-(hydroxymethyl)oxolan-3-ol	C1=NC2=C(N=C(N=C2N1C3C(C(C(O3)CO)O)F)Cl)N		RRM2
(2R,3S,4S,5R)-2-(6-amino-2-fluoropurin-9-yl)-5-(hydroxymethyl)oxolane-3,4-diol	C1=NC2=C(N=C(N=C2N1C3C(C(C(O3)CO)O)O)F)N		POLD1
(2R,3S,4S,5R)-2-(6-amino-2-fluoropurin-9-yl)-5-(hydroxymethyl)oxolane-3,4-diol	C1=NC2=C(N=C(N=C2N1C3C(C(C(O3)CO)O)O)F)N		POLD4
(2R,3S,4S,5R)-2-(6-amino-2-fluoropurin-9-yl)-5-(hydroxymethyl)oxolane-3,4-diol	C1=NC2=C(N=C(N=C2N1C3C(C(C(O3)CO)O)O)F)N		POLE
(2R,3S,4S,5R)-2-(6-amino-2-fluoropurin-9-yl)-5-(hydroxymethyl)oxolane-3,4-diol	C1=NC2=C(N=C(N=C2N1C3C(C(C(O3)CO)O)O)F)N		RRM2
(2R,3R,4S,5R)-2-(6-aminopurin-9-yl)-5-(hydroxymethyl)oxolane-3,4-diol	C1=NC(=C2C(=N1)N(C=N2)C3C(C(C(O3)CO)O)O)N		ADORA1
(2R,3R,4S,5R)-2-(6-aminopurin-9-yl)-5-(hydroxymethyl)oxolane-3,4-diol	C1=NC(=C2C(=N1)N(C=N2)C3C(C(C(O3)CO)O)O)N		ADORA2A
(2R,3R,4S,5R)-2-(6-aminopurin-9-yl)-5-(hydroxymethyl)oxolane-3,4-diol	C1=NC(=C2C(=N1)N(C=N2)C3C(C(C(O3)CO)O)O)N		ADORA2B
5-amino-1-[(2R,3R,4S,5R)-3,4-dihydroxy-5-(hydroxymethyl)oxolan-2-yl]imidazole-4-carboxamide	C1=NC(=C(N1C2C(C(C(O2)CO)O)O)N)C(=O)N		PRKAA2
5-amino-1-[(2R,3R,4S,5R)-3,4-dihydroxy-5-(hydroxymethyl)oxolan-2-yl]imidazole-4-carboxamide	C1=NC(=C(N1C2C(C(C(O2)CO)O)O)N)C(=O)N		PRKAG2
1-[(2R,3R,4S,5R)-3,4-dihydroxy-5-(hydroxymethyl)oxolan-2-yl]-5-hydroxyimidazole-4-carboxamide	C1=NC(=C(N1C2C(C(C(O2)CO)O)O)O)C(=O)N		GMPS
1-[(2R,3R,4S,5R)-3,4-dihydroxy-5-(hydroxymethyl)oxolan-2-yl]-5-hydroxyimidazole-4-carboxamide	C1=NC(=C(N1C2C(C(C(O2)CO)O)O)O)C(=O)N		IMPDH1
4-amino-1-[(2R,3R,4S,5R)-3,4-dihydroxy-5-(hydroxymethyl)oxolan-2-yl]-1,3,5-triazin-2-one	C1=NC(=NC(=O)N1C2C(C(C(O2)CO)O)O)N		DNMT3A
4-amino-1-[(2R,3R,4S,5R)-3,4-dihydroxy-5-(hydroxymethyl)oxolan-2-yl]-1,3,5-triazin-2-one	C1=NC(=NC(=O)N1C2C(C(C(O2)CO)O)O)N		FLT3
1-[(2R,3R,4S,5R)-3,4-dihydroxy-5-(hydroxymethyl)oxolan-2-yl]-1,2,4-triazole-3-carboxamide	C1=NC(=NN1C2C(C(C(O2)CO)O)O)C(=O)N		IMPDH1
1,5-dihydropyrazolo[3,4-d]pyrimidin-4-one	C1=NNC2=C1C(=O)NC=N2		XDH
1,7-dihydropyrazolo[3,4-d]pyrimidine-4,6-dione	C1=NNC2=C1C(=O)NC(=O)N2		XDH
(8R,9S,10R,13S,14S,17R)-13-methyl-17-prop-2-enyl-2,3,6,7,8,9,10,11,12,14,15,16-dodecahydro-1H-cyclopenta[a]phenanthren-17-ol	CC12CCC3C(C1CCC2(CC=C)O)CCC4=CCCCC34		ESR1
(8R,9S,13S,14S,17R)-17-ethynyl-13-methyl-7,8,9,11,12,14,15,16-octahydro-6H-cyclopenta[a]phenanthrene-3,17-diol	CC12CCC3C(C1CCC2(C#C)O)CCC4=C3C=CC(=C4)O		ESR1
(8R,9S,13S,14S,17R)-17-ethynyl-3-methoxy-13-methyl-7,8,9,11,12,14,15,16-octahydro-6H-cyclopenta[a]phenanthren-17-ol	CC12CCC3C(C1CCC2(C#C)O)CCC4=C3C=CC(=C4)OC		ESR1
(8R,9S,13S,14S,17R)-3-cyclopentyloxy-17-ethynyl-13-methyl-7,8,9,11,12,14,15,16-octahydro-6H-cyclopenta[a]phenanthren-17-ol	CC12CCC3C(C1CCC2(C#C)O)CCC4=C3C=CC(=C4)OC5CCCC5		ESR1
(1S,2R,13R,14S,17R,18S)-17-ethynyl-2,18-dimethyl-7-oxa-6-azapentacyclo[11.7.0.02,10.04,8.014,18]icosa-4(8),5,9-trien-17-ol	CC12CCC3C(C1CCC2(C#C)O)CCC4=CC5=C(CC34C)C=NO5		AR
(1S,2S,10S,13R,14S,17S,18S)-2,17,18-trimethyl-6,7-diazapentacyclo[11.7.0.02,10.04,8.014,18]icosa-4(8),5-dien-17-ol	CC12CCC3C(C1CCC2(C)O)CCC4C3(CC5=C(C4)NN=C5)C		AR
(2Z,5S,8R,9S,10S,13S,14S,17S)-17-hydroxy-2-(hydroxymethylidene)-10,13,17-trimethyl-1,4,5,6,7,8,9,11,12,14,15,16-dodecahydrocyclopenta[a]phenanthren-3-one	CC12CCC3C(C1CCC2(C)O)CCC4C3(CC(=CO)C(=O)C4)C		AR
(1S,3aS,3bR,5aS,9aS,9bS,11aS)-1-hydroxy-1,9a,11a-trimethyl-2,3,3a,3b,4,5,5a,6,9,9b,10,11-dodecahydroindeno[4,5-h]isochromen-7-one	CC12CCC3C(C1CCC2(C)O)CCC4C3(COC(=O)C4)C		AR
(8R,9S,10R,13S,14S,17S)-17-hydroxy-10,13,17-trimethyl-7,8,9,11,12,14,15,16-octahydro-6H-cyclopenta[a]phenanthren-3-one	CC12CCC3C(C1CCC2(C)O)CCC4=CC(=O)C=CC34C		AR
[2-(11,17-dihydroxy-10,13-dimethyl-3-oxo-7,8,9,11,12,14,15,16-octahydro-6H-cyclopenta[a]phenanthren-17-yl)-2-oxoethyl] 3,3-dimethylbutanoate	CC12CC(C3C(C1CCC2(C(=O)COC(=O)CC(C)(C)C)O)CCC4=CC(=O)C=CC34C)O		NR3C1
(6S,8S,9S,10R,11S,13S,14S,17R)-6-fluoro-11,17-dihydroxy-17-(2-hydroxyacetyl)-10,13-dimethyl-7,8,9,11,12,14,15,16-octahydro-6H-cyclopenta[a]phenanthren-3-one	CC12CC(C3C(C1CCC2(C(=O)CO)O)CC(C4=CC(=O)C=CC34C)F)O		NR3C1
(8S,9S,10R,11S,13S,14S,17R)-11,17-dihydroxy-17-(2-hydroxyacetyl)-10,13-dimethyl-7,8,9,11,12,14,15,16-octahydro-6H-cyclopenta[a]phenanthren-3-one	CC12CC(C3C(C1CCC2(C(=O)CO)O)CCC4=CC(=O)C=CC34C)O		NR3C1
(8S,9R,10S,11S,13S,14S,16R,17S)-9-fluoro-11,16,17-trihydroxy-17-(2-hydroxyacetyl)-10,13-dimethyl-6,7,8,11,12,14,15,16-octahydrocyclopenta[a]phenanthren-3-one	CC12CC(C3(C(C1CC(C2(C(=O)CO)O)O)CCC4=CC(=O)C=CC43C)F)O		NR3C1
(1S,3aS,3bS,5aR,9aS,9bS,11aS)-8-fluoro-N-(1H-imidazo[4,5-b]pyridin-2-ylmethyl)-6,9a,11a-trimethyl-7-oxo-2,3,3a,3b,4,5,5a,9b,10,11-decahydro-1H-indeno[5,4-f]quinoline-1-carboxamide	CC12CCC3C(C1CCC2C(=O)NCC4=NC5=C(N4)C=CC=N5)CCC6C3(C=C(C(=O)N6C)F)C		AR
chloromethyl (8S,9S,10R,11S,13S,14S,17R)-11,17-dihydroxy-10,13-dimethyl-3-oxo-7,8,9,11,12,14,15,16-octahydro-6H-cyclopenta[a]phenanthrene-17-carboxylate	CC12CC(C3C(C1CCC2(C(=O)OCCl)O)CCC4=CC(=O)C=CC34C)O		NR3C1
(8R,9S,13S,14S)-3-hydroxy-13-methyl-7,8,9,11,12,14,15,16-octahydro-6H-cyclopenta[a]phenanthren-17-one	CC12CCC3C(C1CCC2=O)CCC4=C3C=CC(=C4)O		ESR1
(8R,9S,13S,14S,17S)-13-methyl-6,7,8,9,11,12,14,15,16,17-decahydrocyclopenta[a]phenanthrene-3,17-diol	CC12CCC3C(C1CCC2O)CCC4=C3C=CC(=C4)O		ESR1
(7R,8R,9S,13S,14S,17S)-13-methyl-7-[9-(4,4,5,5,5-pentafluoropentylsulfinyl)nonyl]-6,7,8,9,11,12,14,15,16,17-decahydrocyclopenta[a]phenanthrene-3,17-diol	CC12CCC3C(C1CCC2O)C(CC4=C3C=CC(=C4)O)CCCCCCCCCS(=O)CCCC(C(F)(F)F)(F)F		ESR1
[(8R,9S,13S,14S)-13-methyl-17-oxo-7,8,9,11,12,14,15,16-octahydro-6H-cyclopenta[a]phenanthren-3-yl] hydrogen sulfate	CC12CCC3C(C1CCC2=O)CCC4=C3C=CC(=C4)OS(=O)(=O)O		ESR1
(8R,9S,10R,13S,14S,17S)-17-hydroxy-13-methyl-2,6,7,8,9,10,11,12,14,15,16,17-dodecahydro-1H-cyclopenta[a]phenanthren-3-one	CC12CCC3C(C1CCC2O)CCC4=CC(=O)CCC34		AR
(8R,9S,10R,13S,14S,17S)-17-hydroxy-10,13-dimethyl-1,2,6,7,8,9,11,12,14,15,16,17-dodecahydrocyclopenta[a]phenanthren-3-one	CC12CCC3C(C1CCC2O)CCC4=CC(=O)CCC34C		AR
[(8R,9S,13S,14S,17S)-3-hydroxy-13-methyl-6,7,8,9,11,12,14,15,16,17-decahydrocyclopenta[a]phenanthren-17-yl] 3-cyclopentylpropanoate	CC12CCC3C(C1CCC2OC(=O)CCC4CCCC4)CCC5=C3C=CC(=C5)O		ESR1
[(8R,9S,10R,13S,14S,17S)-10,13-dimethyl-3-oxo-1,2,6,7,8,9,11,12,14,15,16,17-dodecahydrocyclopenta[a]phenanthren-17-yl] 3-cyclopentylpropanoate	CC12CCC3C(C1CCC2OC(=O)CCC4CCCC4)CCC5=CC(=O)CCC35C		AR
[(8R,9S,10R,13S,14S,17S)-13-methyl-3-oxo-2,6,7,8,9,10,11,12,14,15,16,17-dodecahydro-1H-cyclopenta[a]phenanthren-17-yl] 3-phenylpropanoate	CC12CCC3C(C1CCC2OC(=O)CCC4=CC=CC=C4)CCC5=CC(=O)CCC35		AR
(8R,9S,13S,14S,16R,17R)-13-methyl-6,7,8,9,11,12,14,15,16,17-decahydrocyclopenta[a]phenanthrene-3,16,17-triol	CC12CCC3C(C1CC(C2O)O)CCC4=C3C=CC(=C4)O		ESR1
(8R,9S,13S,14S,15R,16R,17R)-13-methyl-6,7,8,9,11,12,14,15,16,17-decahydrocyclopenta[a]phenanthrene-3,15,16,17-tetrol	CC12CCC3C(C1C(C(C2O)O)O)CCC4=C3C=CC(=C4)O		ESR1
(10S,13S,17R)-17-ethynyl-10,13-dimethyl-1,2,3,4,5,6,7,8,9,11,12,14,15,16-tetradecahydrocyclopenta[a]phenanthrene-3,17-diol	CC12CCC(CC1CCC3C2CCC4(C3CCC4(C#C)O)C)O		AR
(3S,8R,9S,10R,13S,14S)-17-(benzimidazol-1-yl)-10,13-dimethyl-2,3,4,7,8,9,11,12,14,15-decahydro-1H-cyclopenta[a]phenanthren-3-ol	CC12CCC(CC1=CCC3C2CCC4(C3CC=C4N5C=NC6=CC=CC=C65)C)O		AR
(2S,3R,4R,6R,18S)-18-hydroxy-3-methoxy-2-methyl-4-(methylamino)-29-oxa-1,7,17-triazaoctacyclo[12.12.2.12,6.07,28.08,13.015,19.020,27.021,26]nonacosa-8,10,12,14,19,21,23,25,27-nonaen-16-one	CC12C(C(CC(O1)N3C4=CC=CC=C4C5=C6C(=C7C8=CC=CC=C8N2C7=C53)C(NC6=O)O)NC)OC		CDK4
(2S,3R,4R,6R,18S)-18-hydroxy-3-methoxy-2-methyl-4-(methylamino)-29-oxa-1,7,17-triazaoctacyclo[12.12.2.12,6.07,28.08,13.015,19.020,27.021,26]nonacosa-8,10,12,14,19,21,23,25,27-nonaen-16-one	CC12C(C(CC(O1)N3C4=CC=CC=C4C5=C6C(=C7C8=CC=CC=C8N2C7=C53)C(NC6=O)O)NC)OC		CDK6
(2S,3R,4R,6R,18S)-18-hydroxy-3-methoxy-2-methyl-4-(methylamino)-29-oxa-1,7,17-triazaoctacyclo[12.12.2.12,6.07,28.08,13.015,19.020,27.021,26]nonacosa-8,10,12,14,19,21,23,25,27-nonaen-16-one	CC12C(C(CC(O1)N3C4=CC=CC=C4C5=C6C(=C7C8=CC=CC=C8N2C7=C53)C(NC6=O)O)NC)OC		PRKCA
(2S,3R,4R,6R,18S)-18-hydroxy-3-methoxy-2-methyl-4-(methylamino)-29-oxa-1,7,17-triazaoctacyclo[12.12.2.12,6.07,28.08,13.015,19.020,27.021,26]nonacosa-8,10,12,14,19,21,23,25,27-nonaen-16-one	CC12C(C(CC(O1)N3C4=CC=CC=C4C5=C6C(=C7C8=CC=CC=C8N2C7=C53)C(NC6=O)O)NC)OC		PRKCB
(2S,3R,4R,6R,18S)-18-hydroxy-3-methoxy-2-methyl-4-(methylamino)-29-oxa-1,7,17-triazaoctacyclo[12.12.2.12,6.07,28.08,13.015,19.020,27.021,26]nonacosa-8,10,12,14,19,21,23,25,27-nonaen-16-one	CC12C(C(CC(O1)N3C4=CC=CC=C4C5=C6C(=C7C8=CC=CC=C8N2C7=C53)C(NC6=O)O)NC)OC		PRKCD
(2S,3R,4R,6R,18S)-18-hydroxy-3-methoxy-2-methyl-4-(methylamino)-29-oxa-1,7,17-triazaoctacyclo[12.12.2.12,6.07,28.08,13.015,19.020,27.021,26]nonacosa-8,10,12,14,19,21,23,25,27-nonaen-16-one	CC12C(C(CC(O1)N3C4=CC=CC=C4C5=C6C(=C7C8=CC=CC=C8N2C7=C53)C(NC6=O)O)NC)OC		PRKCE
(2S,3R,4R,6R,18S)-18-hydroxy-3-methoxy-2-methyl-4-(methylamino)-29-oxa-1,7,17-triazaoctacyclo[12.12.2.12,6.07,28.08,13.015,19.020,27.021,26]nonacosa-8,10,12,14,19,21,23,25,27-nonaen-16-one	CC12C(C(CC(O1)N3C4=CC=CC=C4C5=C6C(=C7C8=CC=CC=C8N2C7=C53)C(NC6=O)O)NC)OC		PRKCH
(2S,3R,4R,6R,18S)-18-hydroxy-3-methoxy-2-methyl-4-(methylamino)-29-oxa-1,7,17-triazaoctacyclo[12.12.2.12,6.07,28.08,13.015,19.020,27.021,26]nonacosa-8,10,12,14,19,21,23,25,27-nonaen-16-one	CC12C(C(CC(O1)N3C4=CC=CC=C4C5=C6C(=C7C8=CC=CC=C8N2C7=C53)C(NC6=O)O)NC)OC		PRKCQ
(2S,3R,4R,6R,18S)-18-hydroxy-3-methoxy-2-methyl-4-(methylamino)-29-oxa-1,7,17-triazaoctacyclo[12.12.2.12,6.07,28.08,13.015,19.020,27.021,26]nonacosa-8,10,12,14,19,21,23,25,27-nonaen-16-one	CC12C(C(CC(O1)N3C4=CC=CC=C4C5=C6C(=C7C8=CC=CC=C8N2C7=C53)C(NC6=O)O)NC)OC		PRKCZ
(2S,3R,4R,6R,18S)-18-hydroxy-3-methoxy-2-methyl-4-(methylamino)-29-oxa-1,7,17-triazaoctacyclo[12.12.2.12,6.07,28.08,13.015,19.020,27.021,26]nonacosa-8,10,12,14,19,21,23,25,27-nonaen-16-one	CC12C(C(CC(O1)N3C4=CC=CC=C4C5=C6C(=C7C8=CC=CC=C8N2C7=C53)C(NC6=O)O)NC)OC		PRKD1
(2S,3R,4R,6R,18S)-18-hydroxy-3-methoxy-2-methyl-4-(methylamino)-29-oxa-1,7,17-triazaoctacyclo[12.12.2.12,6.07,28.08,13.015,19.020,27.021,26]nonacosa-8,10,12,14,19,21,23,25,27-nonaen-16-one	CC12C(C(CC(O1)N3C4=CC=CC=C4C5=C6C(=C7C8=CC=CC=C8N2C7=C53)C(NC6=O)O)NC)OC		PRKD3
(3E,5S,8R,9S,10R,13S,14S)-3-(2-aminoethoxyimino)-10,13-dimethyl-1,2,4,5,7,8,9,11,12,14,15,16-dodecahydrocyclopenta[a]phenanthrene-6,17-dione	CC12CCC(=NOCCN)CC1C(=O)CC3C2CCC4(C3CCC4=O)C		ATP1A1
(3E,5S,8R,9S,10R,13S,14S)-3-(2-aminoethoxyimino)-10,13-dimethyl-1,2,4,5,7,8,9,11,12,14,15,16-dodecahydrocyclopenta[a]phenanthrene-6,17-dione	CC12CCC(=NOCCN)CC1C(=O)CC3C2CCC4(C3CCC4=O)C		ATP1A3
(3E,5S,8R,9S,10R,13S,14S)-3-(2-aminoethoxyimino)-10,13-dimethyl-1,2,4,5,7,8,9,11,12,14,15,16-dodecahydrocyclopenta[a]phenanthrene-6,17-dione	CC12CCC(=NOCCN)CC1C(=O)CC3C2CCC4(C3CCC4=O)C		ATP1B1
(3E,5S,8R,9S,10R,13S,14S)-3-(2-aminoethoxyimino)-10,13-dimethyl-1,2,4,5,7,8,9,11,12,14,15,16-dodecahydrocyclopenta[a]phenanthrene-6,17-dione	CC12CCC(=NOCCN)CC1C(=O)CC3C2CCC4(C3CCC4=O)C		FXYD2
methyl (15S,16R,18R)-16-methoxy-4,15-dimethyl-3-oxo-28-oxa-4,14,19-triazaoctacyclo[12.11.2.115,18.02,6.07,27.08,13.019,26.020,25]octacosa-1,6,8,10,12,20,22,24,26-nonaene-16-carboxylate	CC12C(CC(O1)N3C4=CC=CC=C4C5=C6C(=C7C8=CC=CC=C8N2C7=C53)CN(C6=O)C)(C(=O)OC)OC		NOTCH1
[(15S,16S,18R)-16-methoxy-15-methyl-3-oxo-28-oxa-4,14,19-triazaoctacyclo[12.11.2.115,18.02,6.07,27.08,13.019,26.020,25]octacosa-1,6,8,10,12,20,22,24,26-nonaen-16-yl]methyl 3-[[(2S)-2,6-diaminohexanoyl]amino]propanoate	CC12C(CC(O1)N3C4=CC=CC=C4C5=C6C(=C7C8=CC=CC=C8N2C7=C53)CNC6=O)(COC(=O)CCNC(=O)C(CCCCN)N)OC		FLT3
[(15S,16S,18R)-16-methoxy-15-methyl-3-oxo-28-oxa-4,14,19-triazaoctacyclo[12.11.2.115,18.02,6.07,27.08,13.019,26.020,25]octacosa-1,6,8,10,12,20,22,24,26-nonaen-16-yl]methyl 3-[[(2S)-2,6-diaminohexanoyl]amino]propanoate	CC12C(CC(O1)N3C4=CC=CC=C4C5=C6C(=C7C8=CC=CC=C8N2C7=C53)CNC6=O)(COC(=O)CCNC(=O)C(CCCCN)N)OC		NTRK1
[(15S,16S,18R)-16-methoxy-15-methyl-3-oxo-28-oxa-4,14,19-triazaoctacyclo[12.11.2.115,18.02,6.07,27.08,13.019,26.020,25]octacosa-1,6,8,10,12,20,22,24,26-nonaen-16-yl]methyl 3-[[(2S)-2,6-diaminohexanoyl]amino]propanoate	CC12C(CC(O1)N3C4=CC=CC=C4C5=C6C(=C7C8=CC=CC=C8N2C7=C53)CNC6=O)(COC(=O)CCNC(=O)C(CCCCN)N)OC		NTRK2
[(15S,16S,18R)-16-methoxy-15-methyl-3-oxo-28-oxa-4,14,19-triazaoctacyclo[12.11.2.115,18.02,6.07,27.08,13.019,26.020,25]octacosa-1,6,8,10,12,20,22,24,26-nonaen-16-yl]methyl 3-[[(2S)-2,6-diaminohexanoyl]amino]propanoate	CC12C(CC(O1)N3C4=CC=CC=C4C5=C6C(=C7C8=CC=CC=C8N2C7=C53)CNC6=O)(COC(=O)CCNC(=O)C(CCCCN)N)OC		NTRK3
[(15S,16S,18R)-16-methoxy-15-methyl-3-oxo-28-oxa-4,14,19-triazaoctacyclo[12.11.2.115,18.02,6.07,27.08,13.019,26.020,25]octacosa-1,6,8,10,12,20,22,24,26-nonaen-16-yl]methyl 3-[[(2S)-2,6-diaminohexanoyl]amino]propanoate	CC12C(CC(O1)N3C4=CC=CC=C4C5=C6C(=C7C8=CC=CC=C8N2C7=C53)CNC6=O)(COC(=O)CCNC(=O)C(CCCCN)N)OC		PDGFRB
[(15S,16S,18R)-16-methoxy-15-methyl-3-oxo-28-oxa-4,14,19-triazaoctacyclo[12.11.2.115,18.02,6.07,27.08,13.019,26.020,25]octacosa-1,6,8,10,12,20,22,24,26-nonaen-16-yl]methyl 3-[[(2S)-2,6-diaminohexanoyl]amino]propanoate	CC12C(CC(O1)N3C4=CC=CC=C4C5=C6C(=C7C8=CC=CC=C8N2C7=C53)CNC6=O)(COC(=O)CCNC(=O)C(CCCCN)N)OC		PRKCA
[(15S,16S,18R)-16-methoxy-15-methyl-3-oxo-28-oxa-4,14,19-triazaoctacyclo[12.11.2.115,18.02,6.07,27.08,13.019,26.020,25]octacosa-1,6,8,10,12,20,22,24,26-nonaen-16-yl]methyl 3-[[(2S)-2,6-diaminohexanoyl]amino]propanoate	CC12C(CC(O1)N3C4=CC=CC=C4C5=C6C(=C7C8=CC=CC=C8N2C7=C53)CNC6=O)(COC(=O)CCNC(=O)C(CCCCN)N)OC		PRKCB
[(15S,16S,18R)-16-methoxy-15-methyl-3-oxo-28-oxa-4,14,19-triazaoctacyclo[12.11.2.115,18.02,6.07,27.08,13.019,26.020,25]octacosa-1,6,8,10,12,20,22,24,26-nonaen-16-yl]methyl 3-[[(2S)-2,6-diaminohexanoyl]amino]propanoate	CC12C(CC(O1)N3C4=CC=CC=C4C5=C6C(=C7C8=CC=CC=C8N2C7=C53)CNC6=O)(COC(=O)CCNC(=O)C(CCCCN)N)OC		PRKCD
[(15S,16S,18R)-16-methoxy-15-methyl-3-oxo-28-oxa-4,14,19-triazaoctacyclo[12.11.2.115,18.02,6.07,27.08,13.019,26.020,25]octacosa-1,6,8,10,12,20,22,24,26-nonaen-16-yl]methyl 3-[[(2S)-2,6-diaminohexanoyl]amino]propanoate	CC12C(CC(O1)N3C4=CC=CC=C4C5=C6C(=C7C8=CC=CC=C8N2C7=C53)CNC6=O)(COC(=O)CCNC(=O)C(CCCCN)N)OC		PRKCE
[(15S,16S,18R)-16-methoxy-15-methyl-3-oxo-28-oxa-4,14,19-triazaoctacyclo[12.11.2.115,18.02,6.07,27.08,13.019,26.020,25]octacosa-1,6,8,10,12,20,22,24,26-nonaen-16-yl]methyl 3-[[(2S)-2,6-diaminohexanoyl]amino]propanoate	CC12C(CC(O1)N3C4=CC=CC=C4C5=C6C(=C7C8=CC=CC=C8N2C7=C53)CNC6=O)(COC(=O)CCNC(=O)C(CCCCN)N)OC		PRKCH
[(15S,16S,18R)-16-methoxy-15-methyl-3-oxo-28-oxa-4,14,19-triazaoctacyclo[12.11.2.115,18.02,6.07,27.08,13.019,26.020,25]octacosa-1,6,8,10,12,20,22,24,26-nonaen-16-yl]methyl 3-[[(2S)-2,6-diaminohexanoyl]amino]propanoate	CC12C(CC(O1)N3C4=CC=CC=C4C5=C6C(=C7C8=CC=CC=C8N2C7=C53)CNC6=O)(COC(=O)CCNC(=O)C(CCCCN)N)OC		PRKCQ
[(15S,16S,18R)-16-methoxy-15-methyl-3-oxo-28-oxa-4,14,19-triazaoctacyclo[12.11.2.115,18.02,6.07,27.08,13.019,26.020,25]octacosa-1,6,8,10,12,20,22,24,26-nonaen-16-yl]methyl 3-[[(2S)-2,6-diaminohexanoyl]amino]propanoate	CC12C(CC(O1)N3C4=CC=CC=C4C5=C6C(=C7C8=CC=CC=C8N2C7=C53)CNC6=O)(COC(=O)CCNC(=O)C(CCCCN)N)OC		PRKCZ
[(15S,16S,18R)-16-methoxy-15-methyl-3-oxo-28-oxa-4,14,19-triazaoctacyclo[12.11.2.115,18.02,6.07,27.08,13.019,26.020,25]octacosa-1,6,8,10,12,20,22,24,26-nonaen-16-yl]methyl 3-[[(2S)-2,6-diaminohexanoyl]amino]propanoate	CC12C(CC(O1)N3C4=CC=CC=C4C5=C6C(=C7C8=CC=CC=C8N2C7=C53)CNC6=O)(COC(=O)CCNC(=O)C(CCCCN)N)OC		PRKD1
[(15S,16S,18R)-16-methoxy-15-methyl-3-oxo-28-oxa-4,14,19-triazaoctacyclo[12.11.2.115,18.02,6.07,27.08,13.019,26.020,25]octacosa-1,6,8,10,12,20,22,24,26-nonaen-16-yl]methyl 3-[[(2S)-2,6-diaminohexanoyl]amino]propanoate	CC12C(CC(O1)N3C4=CC=CC=C4C5=C6C(=C7C8=CC=CC=C8N2C7=C53)CNC6=O)(COC(=O)CCNC(=O)C(CCCCN)N)OC		PRKD3
[(15S,16S,18R)-16-methoxy-15-methyl-3-oxo-28-oxa-4,14,19-triazaoctacyclo[12.11.2.115,18.02,6.07,27.08,13.019,26.020,25]octacosa-1,6,8,10,12,20,22,24,26-nonaen-16-yl]methyl 3-[[(2S)-2,6-diaminohexanoyl]amino]propanoate	CC12C(CC(O1)N3C4=CC=CC=C4C5=C6C(=C7C8=CC=CC=C8N2C7=C53)CNC6=O)(COC(=O)CCNC(=O)C(CCCCN)N)OC		RET
(15S,16S,18R)-16-hydroxy-16-(hydroxymethyl)-15-methyl-28-oxa-4,14,19-triazaoctacyclo[12.11.2.115,18.02,6.07,27.08,13.019,26.020,25]octacosa-1,6,8,10,12,20,22,24,26-nonaen-3-one	CC12C(CC(O1)N3C4=CC=CC=C4C5=C6C(=C7C8=CC=CC=C8N2C7=C53)CNC6=O)(CO)O		FLT3
(15S,16S,18R)-16-hydroxy-16-(hydroxymethyl)-15-methyl-28-oxa-4,14,19-triazaoctacyclo[12.11.2.115,18.02,6.07,27.08,13.019,26.020,25]octacosa-1,6,8,10,12,20,22,24,26-nonaen-3-one	CC12C(CC(O1)N3C4=CC=CC=C4C5=C6C(=C7C8=CC=CC=C8N2C7=C53)CNC6=O)(CO)O		JAK2
(15S,16S,18R)-16-hydroxy-16-(hydroxymethyl)-15-methyl-28-oxa-4,14,19-triazaoctacyclo[12.11.2.115,18.02,6.07,27.08,13.019,26.020,25]octacosa-1,6,8,10,12,20,22,24,26-nonaen-3-one	CC12C(CC(O1)N3C4=CC=CC=C4C5=C6C(=C7C8=CC=CC=C8N2C7=C53)CNC6=O)(CO)O		NTRK1
(15S,16S,18R)-16-hydroxy-16-(hydroxymethyl)-15-methyl-28-oxa-4,14,19-triazaoctacyclo[12.11.2.115,18.02,6.07,27.08,13.019,26.020,25]octacosa-1,6,8,10,12,20,22,24,26-nonaen-3-one	CC12C(CC(O1)N3C4=CC=CC=C4C5=C6C(=C7C8=CC=CC=C8N2C7=C53)CNC6=O)(CO)O		NTRK2
(15S,16S,18R)-16-hydroxy-16-(hydroxymethyl)-15-methyl-28-oxa-4,14,19-triazaoctacyclo[12.11.2.115,18.02,6.07,27.08,13.019,26.020,25]octacosa-1,6,8,10,12,20,22,24,26-nonaen-3-one	CC12C(CC(O1)N3C4=CC=CC=C4C5=C6C(=C7C8=CC=CC=C8N2C7=C53)CNC6=O)(CO)O		NTRK3
(15S,16S,18R)-16-hydroxy-16-(hydroxymethyl)-15-methyl-28-oxa-4,14,19-triazaoctacyclo[12.11.2.115,18.02,6.07,27.08,13.019,26.020,25]octacosa-1,6,8,10,12,20,22,24,26-nonaen-3-one	CC12C(CC(O1)N3C4=CC=CC=C4C5=C6C(=C7C8=CC=CC=C8N2C7=C53)CNC6=O)(CO)O		RET
(8R,9S,10R,13S,14S,17S)-17-hydroxy-10,13,17-trimethyl-2,6,7,8,9,11,12,14,15,16-decahydro-1H-cyclopenta[a]phenanthren-3-one	CC12CCC(=O)C=C1CCC3C2CCC4(C3CCC4(C)O)C		AR
[2-[(8S,9S,10R,11S,13S,14S,17R)-11,17-dihydroxy-10,13-dimethyl-3-oxo-2,6,7,8,9,11,12,14,15,16-decahydro-1H-cyclopenta[a]phenanthren-17-yl]-2-oxoethyl] 3-cyclopentylpropanoate	CC12CCC(=O)C=C1CCC3C2C(CC4(C3CCC4(C(=O)COC(=O)CCC5CCCC5)O)C)O		NR3C1
4-[2-[(8S,9S,10R,11S,13S,14S,17R)-11,17-dihydroxy-10,13-dimethyl-3-oxo-2,6,7,8,9,11,12,14,15,16-decahydro-1H-cyclopenta[a]phenanthren-17-yl]-2-oxoethoxy]-4-oxobutanoic acid	CC12CCC(=O)C=C1CCC3C2C(CC4(C3CCC4(C(=O)COC(=O)CCC(=O)O)O)C)O		NR3C1
(8S,9R,10S,11S,13S,14S,17S)-9-fluoro-11,17-dihydroxy-10,13,17-trimethyl-1,2,6,7,8,11,12,14,15,16-decahydrocyclopenta[a]phenanthren-3-one	CC12CCC(=O)C=C1CCC3C2(C(CC4(C3CCC4(C)O)C)O)F		AR
(8S,9S,10R,13S,14S,17R)-17-hydroxy-17-(2-hydroxyacetyl)-10,13-dimethyl-6,7,8,9,12,14,15,16-octahydrocyclopenta[a]phenanthrene-3,11-dione	CC12CC(=O)C3C(C1CCC2(C(=O)CO)O)CCC4=CC(=O)C=CC34C		NR3C1
(1R,4R,5S)-4-(2-chloroethyl)-1-[(S)-[(1S)-cyclohex-2-en-1-yl]-hydroxymethyl]-5-methyl-6-oxa-2-azabicyclo[3.2.0]heptane-3,7-dione	CC12C(C(=O)NC1(C(=O)O2)C(C3CCCC=C3)O)CCCl		PSMB8
(1R,4R,5S)-4-(2-chloroethyl)-1-[(S)-[(1S)-cyclohex-2-en-1-yl]-hydroxymethyl]-5-methyl-6-oxa-2-azabicyclo[3.2.0]heptane-3,7-dione	CC12C(C(=O)NC1(C(=O)O2)C(C3CCCC=C3)O)CCCl		PSMB9
(1R,2S,5S)-N-(4-amino-1-cyclobutyl-3,4-dioxobutan-2-yl)-3-[(2S)-2-(tert-butylcarbamoylamino)-3,3-dimethylbutanoyl]-6,6-dimethyl-3-azabicyclo[3.1.0]hexane-2-carboxamide	CC1(C2C1C(N(C2)C(=O)C(C(C)(C)C)NC(=O)NC(C)(C)C)C(=O)NC(CC3CCC3)C(=O)C(=O)N)C		KRAS
(1R,5R,6R,7R,9S,11S,12R,13S,14S)-3-amino-14-(hydroxymethyl)-8,10-dioxa-2,4-diazatetracyclo[7.3.1.17,11.01,6]tetradec-3-ene-5,9,12,13,14-pentol	C(C1(C2C3C(N=C(NC34C(C1OC(C4O)(O2)O)O)N)O)O)O		MTOR
(1R,5R,6R,7R,9S,11S,12R,13S,14S)-3-amino-14-(hydroxymethyl)-8,10-dioxa-2,4-diazatetracyclo[7.3.1.17,11.01,6]tetradec-3-ene-5,9,12,13,14-pentol	C(C1(C2C3C(N=C(NC34C(C1OC(C4O)(O2)O)O)N)O)O)O		PIK3CA
(1R,5R,6R,7R,9S,11S,12R,13S,14S)-3-amino-14-(hydroxymethyl)-8,10-dioxa-2,4-diazatetracyclo[7.3.1.17,11.01,6]tetradec-3-ene-5,9,12,13,14-pentol	C(C1(C2C3C(N=C(NC34C(C1OC(C4O)(O2)O)O)N)O)O)O		PIK3CB
(1R,5R,6R,7R,9S,11S,12R,13S,14S)-3-amino-14-(hydroxymethyl)-8,10-dioxa-2,4-diazatetracyclo[7.3.1.17,11.01,6]tetradec-3-ene-5,9,12,13,14-pentol	C(C1(C2C3C(N=C(NC34C(C1OC(C4O)(O2)O)O)N)O)O)O		PIK3CD
(1R,5R,6R,7R,9S,11S,12R,13S,14S)-3-amino-14-(hydroxymethyl)-8,10-dioxa-2,4-diazatetracyclo[7.3.1.17,11.01,6]tetradec-3-ene-5,9,12,13,14-pentol	C(C1(C2C3C(N=C(NC34C(C1OC(C4O)(O2)O)O)N)O)O)O		PIK3CG
(1R,5R,6R,7R,9S,11S,12R,13S,14S)-3-amino-14-(hydroxymethyl)-8,10-dioxa-2,4-diazatetracyclo[7.3.1.17,11.01,6]tetradec-3-ene-5,9,12,13,14-pentol	C(C1(C2C3C(N=C(NC34C(C1OC(C4O)(O2)O)O)N)O)O)O		PIK3R1
(1R,5R,6R,7R,9S,11S,12R,13S,14S)-3-amino-14-(hydroxymethyl)-8,10-dioxa-2,4-diazatetracyclo[7.3.1.17,11.01,6]tetradec-3-ene-5,9,12,13,14-pentol	C(C1(C2C3C(N=C(NC34C(C1OC(C4O)(O2)O)O)N)O)O)O		PIK3R3
(4S,4aR,5S,5aR,6R,12aR)-4-(dimethylamino)-1,5,10,11,12a-pentahydroxy-6-methyl-3,12-dioxo-4a,5,5a,6-tetrahydro-4H-tetracene-2-carboxamide	CC1C2C(C3C(C(=O)C(=C(C3(C(=O)C2=C(C4=C1C=CC=C4O)O)O)O)C(=O)N)N(C)C)O		MMP1
(4S,4aR,5S,5aR,6R,12aR)-4-(dimethylamino)-1,5,10,11,12a-pentahydroxy-6-methyl-3,12-dioxo-4a,5,5a,6-tetrahydro-4H-tetracene-2-carboxamide	CC1C2C(C3C(C(=O)C(=C(C3(C(=O)C2=C(C4=C1C=CC=C4O)O)O)O)C(=O)N)N(C)C)O		MMP13
(4S,4aR,5S,5aR,6R,12aR)-4-(dimethylamino)-1,5,10,11,12a-pentahydroxy-6-methyl-3,12-dioxo-4a,5,5a,6-tetrahydro-4H-tetracene-2-carboxamide	CC1C2C(C3C(C(=O)C(=C(C3(C(=O)C2=C(C4=C1C=CC=C4O)O)O)O)C(=O)N)N(C)C)O		MMP7
(4S,4aR,5S,5aR,6R,12aR)-4-(dimethylamino)-1,5,10,11,12a-pentahydroxy-6-methyl-3,12-dioxo-4a,5,5a,6-tetrahydro-4H-tetracene-2-carboxamide	CC1C2C(C3C(C(=O)C(=C(C3(C(=O)C2=C(C4=C1C=CC=C4O)O)O)O)C(=O)N)N(C)C)O		MMP8
(2S,4aS,6aR,6aS,6bR,8aR,10S,12aS,14bR)-10-(3-carboxypropanoyloxy)-2,4a,6a,6b,9,9,12a-heptamethyl-13-oxo-3,4,5,6,6a,7,8,8a,10,11,12,14b-dodecahydro-1H-picene-2-carboxylic acid	CC1(C2CCC3(C(C2(CCC1OC(=O)CCC(=O)O)C)C(=O)C=C4C3(CCC5(C4CC(CC5)(C)C(=O)O)C)C)C)C		HSD11B2
(1R,2S,4S)-N,2,3,3-tetramethylbicyclo[2.2.1]heptan-2-amine	CC1(C2CCC(C2)C1(C)NC)C		CHRNB2
2-[(4-hydroxy-1-methyl-7-phenoxyisoquinoline-3-carbonyl)amino]acetic acid	CC1=C2C=C(C=CC2=C(C(=N1)C(=O)NCC(=O)O)O)OC3=CC=CC=C3		EGLN3
2-[(4-hydroxy-1-methyl-7-phenoxyisoquinoline-3-carbonyl)amino]acetic acid	CC1=C2C=C(C=CC2=C(C(=N1)C(=O)NCC(=O)O)O)OC3=CC=CC=C3		P4HTM
(16R)-19-amino-13-fluoro-4,8,16-trimethyl-9-oxo-17-oxa-4,5,8,20-tetrazatetracyclo[16.3.1.02,6.010,15]docosa-1(22),2,5,10(15),11,13,18,20-octaene-3-carbonitrile	CC1C2=C(C=CC(=C2)F)C(=O)N(CC3=NN(C(=C3C4=CC(=C(N=C4)N)O1)C#N)C)C		ALK
(16R)-19-amino-13-fluoro-4,8,16-trimethyl-9-oxo-17-oxa-4,5,8,20-tetrazatetracyclo[16.3.1.02,6.010,15]docosa-1(22),2,5,10(15),11,13,18,20-octaene-3-carbonitrile	CC1C2=C(C=CC(=C2)F)C(=O)N(CC3=NN(C(=C3C4=CC(=C(N=C4)N)O1)C#N)C)C		EML4
(2S)-1-(1H-indol-3-yl)-3-[5-(3-methyl-2H-indazol-5-yl)pyridin-3-yl]oxypropan-2-amine	CC1=C2C=C(C=CC2=NN1)C3=CC(=CN=C3)OCC(CC4=CNC5=CC=CC=C54)N		AKT1
(2S)-1-(1H-indol-3-yl)-3-[5-(3-methyl-2H-indazol-5-yl)pyridin-3-yl]oxypropan-2-amine	CC1=C2C=C(C=CC2=NN1)C3=CC(=CN=C3)OCC(CC4=CNC5=CC=CC=C54)N		AKT2
(2S)-1-(1H-indol-3-yl)-3-[5-(3-methyl-2H-indazol-5-yl)pyridin-3-yl]oxypropan-2-amine	CC1=C2C=C(C=CC2=NN1)C3=CC(=CN=C3)OCC(CC4=CNC5=CC=CC=C54)N		AKT3
1-amino-4-[[5-[[(2S)-1-[[(1S,2R,3S,5S,6S,16E,18E,20R,21S)-11-chloro-21-hydroxy-12,20-dimethoxy-2,5,9,16-tetramethyl-8,23-dioxo-4,24-dioxa-9,22-diazatetracyclo[19.3.1.110,14.03,5]hexacosa-10,12,14(26),16,18-pentaen-6-yl]oxy]-1-oxopropan-2-yl]-methylamino]-2-methyl-5-oxopentan-2-yl]disulfanyl]-1-oxobutane-2-sulfonic acid	CC1C2CC(C(C=CC=C(CC3=CC(=C(C(=C3)OC)Cl)N(C(=O)CC(C4(C1O4)C)OC(=O)C(C)N(C)C(=O)CCC(C)(C)SSCCC(C(=O)N)S(=O)(=O)O)C)C)OC)(NC(=O)O2)O		FOLR1
1-amino-4-[[5-[[(2S)-1-[[(1S,2R,3S,5S,6S,16E,18E,20R,21S)-11-chloro-21-hydroxy-12,20-dimethoxy-2,5,9,16-tetramethyl-8,23-dioxo-4,24-dioxa-9,22-diazatetracyclo[19.3.1.110,14.03,5]hexacosa-10,12,14(26),16,18-pentaen-6-yl]oxy]-1-oxopropan-2-yl]-methylamino]-2-methyl-5-oxopentan-2-yl]disulfanyl]-1-oxobutane-2-sulfonic acid	CC1C2CC(C(C=CC=C(CC3=CC(=C(C(=C3)OC)Cl)N(C(=O)CC(C4(C1O4)C)OC(=O)C(C)N(C)C(=O)CCC(C)(C)SSCCC(C(=O)N)S(=O)(=O)O)C)C)OC)(NC(=O)O2)O		TUBA1A
1-amino-4-[[5-[[(2S)-1-[[(1S,2R,3S,5S,6S,16E,18E,20R,21S)-11-chloro-21-hydroxy-12,20-dimethoxy-2,5,9,16-tetramethyl-8,23-dioxo-4,24-dioxa-9,22-diazatetracyclo[19.3.1.110,14.03,5]hexacosa-10,12,14(26),16,18-pentaen-6-yl]oxy]-1-oxopropan-2-yl]-methylamino]-2-methyl-5-oxopentan-2-yl]disulfanyl]-1-oxobutane-2-sulfonic acid	CC1C2CC(C(C=CC=C(CC3=CC(=C(C(=C3)OC)Cl)N(C(=O)CC(C4(C1O4)C)OC(=O)C(C)N(C)C(=O)CCC(C)(C)SSCCC(C(=O)N)S(=O)(=O)O)C)C)OC)(NC(=O)O2)O		TUBA1C
1-amino-4-[[5-[[(2S)-1-[[(1S,2R,3S,5S,6S,16E,18E,20R,21S)-11-chloro-21-hydroxy-12,20-dimethoxy-2,5,9,16-tetramethyl-8,23-dioxo-4,24-dioxa-9,22-diazatetracyclo[19.3.1.110,14.03,5]hexacosa-10,12,14(26),16,18-pentaen-6-yl]oxy]-1-oxopropan-2-yl]-methylamino]-2-methyl-5-oxopentan-2-yl]disulfanyl]-1-oxobutane-2-sulfonic acid	CC1C2CC(C(C=CC=C(CC3=CC(=C(C(=C3)OC)Cl)N(C(=O)CC(C4(C1O4)C)OC(=O)C(C)N(C)C(=O)CCC(C)(C)SSCCC(C(=O)N)S(=O)(=O)O)C)C)OC)(NC(=O)O2)O		TUBA3C
1-amino-4-[[5-[[(2S)-1-[[(1S,2R,3S,5S,6S,16E,18E,20R,21S)-11-chloro-21-hydroxy-12,20-dimethoxy-2,5,9,16-tetramethyl-8,23-dioxo-4,24-dioxa-9,22-diazatetracyclo[19.3.1.110,14.03,5]hexacosa-10,12,14(26),16,18-pentaen-6-yl]oxy]-1-oxopropan-2-yl]-methylamino]-2-methyl-5-oxopentan-2-yl]disulfanyl]-1-oxobutane-2-sulfonic acid	CC1C2CC(C(C=CC=C(CC3=CC(=C(C(=C3)OC)Cl)N(C(=O)CC(C4(C1O4)C)OC(=O)C(C)N(C)C(=O)CCC(C)(C)SSCCC(C(=O)N)S(=O)(=O)O)C)C)OC)(NC(=O)O2)O		TUBA4A
1-amino-4-[[5-[[(2S)-1-[[(1S,2R,3S,5S,6S,16E,18E,20R,21S)-11-chloro-21-hydroxy-12,20-dimethoxy-2,5,9,16-tetramethyl-8,23-dioxo-4,24-dioxa-9,22-diazatetracyclo[19.3.1.110,14.03,5]hexacosa-10,12,14(26),16,18-pentaen-6-yl]oxy]-1-oxopropan-2-yl]-methylamino]-2-methyl-5-oxopentan-2-yl]disulfanyl]-1-oxobutane-2-sulfonic acid	CC1C2CC(C(C=CC=C(CC3=CC(=C(C(=C3)OC)Cl)N(C(=O)CC(C4(C1O4)C)OC(=O)C(C)N(C)C(=O)CCC(C)(C)SSCCC(C(=O)N)S(=O)(=O)O)C)C)OC)(NC(=O)O2)O		TUBB2A
1-amino-4-[[5-[[(2S)-1-[[(1S,2R,3S,5S,6S,16E,18E,20R,21S)-11-chloro-21-hydroxy-12,20-dimethoxy-2,5,9,16-tetramethyl-8,23-dioxo-4,24-dioxa-9,22-diazatetracyclo[19.3.1.110,14.03,5]hexacosa-10,12,14(26),16,18-pentaen-6-yl]oxy]-1-oxopropan-2-yl]-methylamino]-2-methyl-5-oxopentan-2-yl]disulfanyl]-1-oxobutane-2-sulfonic acid	CC1C2CC(C(C=CC=C(CC3=CC(=C(C(=C3)OC)Cl)N(C(=O)CC(C4(C1O4)C)OC(=O)C(C)N(C)C(=O)CCC(C)(C)SSCCC(C(=O)N)S(=O)(=O)O)C)C)OC)(NC(=O)O2)O		TUBB2B
1-amino-4-[[5-[[(2S)-1-[[(1S,2R,3S,5S,6S,16E,18E,20R,21S)-11-chloro-21-hydroxy-12,20-dimethoxy-2,5,9,16-tetramethyl-8,23-dioxo-4,24-dioxa-9,22-diazatetracyclo[19.3.1.110,14.03,5]hexacosa-10,12,14(26),16,18-pentaen-6-yl]oxy]-1-oxopropan-2-yl]-methylamino]-2-methyl-5-oxopentan-2-yl]disulfanyl]-1-oxobutane-2-sulfonic acid	CC1C2CC(C(C=CC=C(CC3=CC(=C(C(=C3)OC)Cl)N(C(=O)CC(C4(C1O4)C)OC(=O)C(C)N(C)C(=O)CCC(C)(C)SSCCC(C(=O)N)S(=O)(=O)O)C)C)OC)(NC(=O)O2)O		TUBB3
1-amino-4-[[5-[[(2S)-1-[[(1S,2R,3S,5S,6S,16E,18E,20R,21S)-11-chloro-21-hydroxy-12,20-dimethoxy-2,5,9,16-tetramethyl-8,23-dioxo-4,24-dioxa-9,22-diazatetracyclo[19.3.1.110,14.03,5]hexacosa-10,12,14(26),16,18-pentaen-6-yl]oxy]-1-oxopropan-2-yl]-methylamino]-2-methyl-5-oxopentan-2-yl]disulfanyl]-1-oxobutane-2-sulfonic acid	CC1C2CC(C(C=CC=C(CC3=CC(=C(C(=C3)OC)Cl)N(C(=O)CC(C4(C1O4)C)OC(=O)C(C)N(C)C(=O)CCC(C)(C)SSCCC(C(=O)N)S(=O)(=O)O)C)C)OC)(NC(=O)O2)O		TUBB4A
1-amino-4-[[5-[[(2S)-1-[[(1S,2R,3S,5S,6S,16E,18E,20R,21S)-11-chloro-21-hydroxy-12,20-dimethoxy-2,5,9,16-tetramethyl-8,23-dioxo-4,24-dioxa-9,22-diazatetracyclo[19.3.1.110,14.03,5]hexacosa-10,12,14(26),16,18-pentaen-6-yl]oxy]-1-oxopropan-2-yl]-methylamino]-2-methyl-5-oxopentan-2-yl]disulfanyl]-1-oxobutane-2-sulfonic acid	CC1C2CC(C(C=CC=C(CC3=CC(=C(C(=C3)OC)Cl)N(C(=O)CC(C4(C1O4)C)OC(=O)C(C)N(C)C(=O)CCC(C)(C)SSCCC(C(=O)N)S(=O)(=O)O)C)C)OC)(NC(=O)O2)O		TUBB6
(2S)-2-amino-6-[4-[[3-[[(2S)-1-[[(1S,2R,3S,5S,6S,16E,18E,20R,21S)-11-chloro-21-hydroxy-12,20-dimethoxy-2,5,9,16-tetramethyl-8,23-dioxo-4,24-dioxa-9,22-diazatetracyclo[19.3.1.110,14.03,5]hexacosa-10,12,14(26),16,18-pentaen-6-yl]oxy]-1-oxopropan-2-yl]-methylamino]-3-oxopropyl]disulfanyl]pentanoylamino]hexanoic acid	CC1C2CC(C(C=CC=C(CC3=CC(=C(C(=C3)OC)Cl)N(C(=O)CC(C4(C1O4)C)OC(=O)C(C)N(C)C(=O)CCSSC(C)CCC(=O)NCCCCC(C(=O)O)N)C)C)OC)(NC(=O)O2)O		NCAM1
(2S)-2-amino-6-[4-[[3-[[(2S)-1-[[(1S,2R,3S,5S,6S,16E,18E,20R,21S)-11-chloro-21-hydroxy-12,20-dimethoxy-2,5,9,16-tetramethyl-8,23-dioxo-4,24-dioxa-9,22-diazatetracyclo[19.3.1.110,14.03,5]hexacosa-10,12,14(26),16,18-pentaen-6-yl]oxy]-1-oxopropan-2-yl]-methylamino]-3-oxopropyl]disulfanyl]pentanoylamino]hexanoic acid	CC1C2CC(C(C=CC=C(CC3=CC(=C(C(=C3)OC)Cl)N(C(=O)CC(C4(C1O4)C)OC(=O)C(C)N(C)C(=O)CCSSC(C)CCC(=O)NCCCCC(C(=O)O)N)C)C)OC)(NC(=O)O2)O		TUBA1A
(2S)-2-amino-6-[4-[[3-[[(2S)-1-[[(1S,2R,3S,5S,6S,16E,18E,20R,21S)-11-chloro-21-hydroxy-12,20-dimethoxy-2,5,9,16-tetramethyl-8,23-dioxo-4,24-dioxa-9,22-diazatetracyclo[19.3.1.110,14.03,5]hexacosa-10,12,14(26),16,18-pentaen-6-yl]oxy]-1-oxopropan-2-yl]-methylamino]-3-oxopropyl]disulfanyl]pentanoylamino]hexanoic acid	CC1C2CC(C(C=CC=C(CC3=CC(=C(C(=C3)OC)Cl)N(C(=O)CC(C4(C1O4)C)OC(=O)C(C)N(C)C(=O)CCSSC(C)CCC(=O)NCCCCC(C(=O)O)N)C)C)OC)(NC(=O)O2)O		TUBA1C
(2S)-2-amino-6-[4-[[3-[[(2S)-1-[[(1S,2R,3S,5S,6S,16E,18E,20R,21S)-11-chloro-21-hydroxy-12,20-dimethoxy-2,5,9,16-tetramethyl-8,23-dioxo-4,24-dioxa-9,22-diazatetracyclo[19.3.1.110,14.03,5]hexacosa-10,12,14(26),16,18-pentaen-6-yl]oxy]-1-oxopropan-2-yl]-methylamino]-3-oxopropyl]disulfanyl]pentanoylamino]hexanoic acid	CC1C2CC(C(C=CC=C(CC3=CC(=C(C(=C3)OC)Cl)N(C(=O)CC(C4(C1O4)C)OC(=O)C(C)N(C)C(=O)CCSSC(C)CCC(=O)NCCCCC(C(=O)O)N)C)C)OC)(NC(=O)O2)O		TUBA3C
(2S)-2-amino-6-[4-[[3-[[(2S)-1-[[(1S,2R,3S,5S,6S,16E,18E,20R,21S)-11-chloro-21-hydroxy-12,20-dimethoxy-2,5,9,16-tetramethyl-8,23-dioxo-4,24-dioxa-9,22-diazatetracyclo[19.3.1.110,14.03,5]hexacosa-10,12,14(26),16,18-pentaen-6-yl]oxy]-1-oxopropan-2-yl]-methylamino]-3-oxopropyl]disulfanyl]pentanoylamino]hexanoic acid	CC1C2CC(C(C=CC=C(CC3=CC(=C(C(=C3)OC)Cl)N(C(=O)CC(C4(C1O4)C)OC(=O)C(C)N(C)C(=O)CCSSC(C)CCC(=O)NCCCCC(C(=O)O)N)C)C)OC)(NC(=O)O2)O		TUBA4A
(2S)-2-amino-6-[4-[[3-[[(2S)-1-[[(1S,2R,3S,5S,6S,16E,18E,20R,21S)-11-chloro-21-hydroxy-12,20-dimethoxy-2,5,9,16-tetramethyl-8,23-dioxo-4,24-dioxa-9,22-diazatetracyclo[19.3.1.110,14.03,5]hexacosa-10,12,14(26),16,18-pentaen-6-yl]oxy]-1-oxopropan-2-yl]-methylamino]-3-oxopropyl]disulfanyl]pentanoylamino]hexanoic acid	CC1C2CC(C(C=CC=C(CC3=CC(=C(C(=C3)OC)Cl)N(C(=O)CC(C4(C1O4)C)OC(=O)C(C)N(C)C(=O)CCSSC(C)CCC(=O)NCCCCC(C(=O)O)N)C)C)OC)(NC(=O)O2)O		TUBB2A
(2S)-2-amino-6-[4-[[3-[[(2S)-1-[[(1S,2R,3S,5S,6S,16E,18E,20R,21S)-11-chloro-21-hydroxy-12,20-dimethoxy-2,5,9,16-tetramethyl-8,23-dioxo-4,24-dioxa-9,22-diazatetracyclo[19.3.1.110,14.03,5]hexacosa-10,12,14(26),16,18-pentaen-6-yl]oxy]-1-oxopropan-2-yl]-methylamino]-3-oxopropyl]disulfanyl]pentanoylamino]hexanoic acid	CC1C2CC(C(C=CC=C(CC3=CC(=C(C(=C3)OC)Cl)N(C(=O)CC(C4(C1O4)C)OC(=O)C(C)N(C)C(=O)CCSSC(C)CCC(=O)NCCCCC(C(=O)O)N)C)C)OC)(NC(=O)O2)O		TUBB2B
(2S)-2-amino-6-[4-[[3-[[(2S)-1-[[(1S,2R,3S,5S,6S,16E,18E,20R,21S)-11-chloro-21-hydroxy-12,20-dimethoxy-2,5,9,16-tetramethyl-8,23-dioxo-4,24-dioxa-9,22-diazatetracyclo[19.3.1.110,14.03,5]hexacosa-10,12,14(26),16,18-pentaen-6-yl]oxy]-1-oxopropan-2-yl]-methylamino]-3-oxopropyl]disulfanyl]pentanoylamino]hexanoic acid	CC1C2CC(C(C=CC=C(CC3=CC(=C(C(=C3)OC)Cl)N(C(=O)CC(C4(C1O4)C)OC(=O)C(C)N(C)C(=O)CCSSC(C)CCC(=O)NCCCCC(C(=O)O)N)C)C)OC)(NC(=O)O2)O		TUBB3
(2S)-2-amino-6-[4-[[3-[[(2S)-1-[[(1S,2R,3S,5S,6S,16E,18E,20R,21S)-11-chloro-21-hydroxy-12,20-dimethoxy-2,5,9,16-tetramethyl-8,23-dioxo-4,24-dioxa-9,22-diazatetracyclo[19.3.1.110,14.03,5]hexacosa-10,12,14(26),16,18-pentaen-6-yl]oxy]-1-oxopropan-2-yl]-methylamino]-3-oxopropyl]disulfanyl]pentanoylamino]hexanoic acid	CC1C2CC(C(C=CC=C(CC3=CC(=C(C(=C3)OC)Cl)N(C(=O)CC(C4(C1O4)C)OC(=O)C(C)N(C)C(=O)CCSSC(C)CCC(=O)NCCCCC(C(=O)O)N)C)C)OC)(NC(=O)O2)O		TUBB4A
(2S)-2-amino-6-[4-[[3-[[(2S)-1-[[(1S,2R,3S,5S,6S,16E,18E,20R,21S)-11-chloro-21-hydroxy-12,20-dimethoxy-2,5,9,16-tetramethyl-8,23-dioxo-4,24-dioxa-9,22-diazatetracyclo[19.3.1.110,14.03,5]hexacosa-10,12,14(26),16,18-pentaen-6-yl]oxy]-1-oxopropan-2-yl]-methylamino]-3-oxopropyl]disulfanyl]pentanoylamino]hexanoic acid	CC1C2CC(C(C=CC=C(CC3=CC(=C(C(=C3)OC)Cl)N(C(=O)CC(C4(C1O4)C)OC(=O)C(C)N(C)C(=O)CCSSC(C)CCC(=O)NCCCCC(C(=O)O)N)C)C)OC)(NC(=O)O2)O		TUBB6
[2-chloro-3-(trifluoromethyl)phenyl]-[(4R)-1-(5-fluoropyrimidin-2-yl)-4-methyl-6,7-dihydro-4H-triazolo[4,5-c]pyridin-5-yl]methanone	CC1C2=C(CCN1C(=O)C3=C(C(=CC=C3)C(F)(F)F)Cl)N(N=N2)C4=NC=C(C=N4)F		P2RX7
2-amino-8-[4-(2-hydroxyethoxy)cyclohexyl]-6-(6-methoxypyridin-3-yl)-4-methylpyrido[2,3-d]pyrimidin-7-one	CC1=C2C=C(C(=O)N(C2=NC(=N1)N)C3CCC(CC3)OCCO)C4=CN=C(C=C4)OC		MTOR
2-amino-8-[4-(2-hydroxyethoxy)cyclohexyl]-6-(6-methoxypyridin-3-yl)-4-methylpyrido[2,3-d]pyrimidin-7-one	CC1=C2C=C(C(=O)N(C2=NC(=N1)N)C3CCC(CC3)OCCO)C4=CN=C(C=C4)OC		PIK3C2B
2-amino-8-[4-(2-hydroxyethoxy)cyclohexyl]-6-(6-methoxypyridin-3-yl)-4-methylpyrido[2,3-d]pyrimidin-7-one	CC1=C2C=C(C(=O)N(C2=NC(=N1)N)C3CCC(CC3)OCCO)C4=CN=C(C=C4)OC		PIK3CA
2-amino-8-[4-(2-hydroxyethoxy)cyclohexyl]-6-(6-methoxypyridin-3-yl)-4-methylpyrido[2,3-d]pyrimidin-7-one	CC1=C2C=C(C(=O)N(C2=NC(=N1)N)C3CCC(CC3)OCCO)C4=CN=C(C=C4)OC		PIK3CB
2-amino-8-[4-(2-hydroxyethoxy)cyclohexyl]-6-(6-methoxypyridin-3-yl)-4-methylpyrido[2,3-d]pyrimidin-7-one	CC1=C2C=C(C(=O)N(C2=NC(=N1)N)C3CCC(CC3)OCCO)C4=CN=C(C=C4)OC		PIK3CD
2-amino-8-[4-(2-hydroxyethoxy)cyclohexyl]-6-(6-methoxypyridin-3-yl)-4-methylpyrido[2,3-d]pyrimidin-7-one	CC1=C2C=C(C(=O)N(C2=NC(=N1)N)C3CCC(CC3)OCCO)C4=CN=C(C=C4)OC		PIK3CG
2-amino-8-[4-(2-hydroxyethoxy)cyclohexyl]-6-(6-methoxypyridin-3-yl)-4-methylpyrido[2,3-d]pyrimidin-7-one	CC1=C2C=C(C(=O)N(C2=NC(=N1)N)C3CCC(CC3)OCCO)C4=CN=C(C=C4)OC		PIK3R1
2-amino-8-[4-(2-hydroxyethoxy)cyclohexyl]-6-(6-methoxypyridin-3-yl)-4-methylpyrido[2,3-d]pyrimidin-7-one	CC1=C2C=C(C(=O)N(C2=NC(=N1)N)C3CCC(CC3)OCCO)C4=CN=C(C=C4)OC		PIK3R3
6,6-dimethyl-2-[2-[(2-methylpyrazol-3-yl)amino]pyrimidin-4-yl]-5-(2-morpholin-4-ylethyl)thieno[2,3-c]pyrrol-4-one	CC1(C2=C(C=C(S2)C3=NC(=NC=C3)NC4=CC=NN4C)C(=O)N1CCN5CCOCC5)C		MAPK1
N-[3-[3-cyclopropyl-5-(2-fluoro-4-iodoanilino)-6,8-dimethyl-2,4,7-trioxopyrido[4,3-d]pyrimidin-1-yl]phenyl]acetamide	CC1=C2C(=C(N(C1=O)C)NC3=C(C=C(C=C3)I)F)C(=O)N(C(=O)N2C4=CC=CC(=C4)NC(=O)C)C5CC5		MAP2K1
N-[3-[3-cyclopropyl-5-(2-fluoro-4-iodoanilino)-6,8-dimethyl-2,4,7-trioxopyrido[4,3-d]pyrimidin-1-yl]phenyl]acetamide	CC1=C2C(=C(N(C1=O)C)NC3=C(C=C(C=C3)I)F)C(=O)N(C(=O)N2C4=CC=CC(=C4)NC(=O)C)C5CC5		MAP2K2
[(1S,2S,3R,4S,7R,9S,11R,13R,16S)-4,13-diacetyloxy-1-hydroxy-16-[(2R,3S)-2-hydroxy-3-[(2-methylpropan-2-yl)oxycarbonylamino]-3-phenylpropanoyl]oxy-15,18,18-trimethyl-12-oxo-6-oxapentacyclo[12.3.1.03,11.04,7.09,11]octadec-14-en-2-yl] benzoate	CC1=C2C(C(=O)C34CC3CC5C(C4C(C(C2(C)C)(CC1OC(=O)C(C(C6=CC=CC=C6)NC(=O)OC(C)(C)C)O)O)OC(=O)C7=CC=CC=C7)(CO5)OC(=O)C)OC(=O)C		TUBA1A
[(1S,2S,3R,4S,7R,9S,11R,13R,16S)-4,13-diacetyloxy-1-hydroxy-16-[(2R,3S)-2-hydroxy-3-[(2-methylpropan-2-yl)oxycarbonylamino]-3-phenylpropanoyl]oxy-15,18,18-trimethyl-12-oxo-6-oxapentacyclo[12.3.1.03,11.04,7.09,11]octadec-14-en-2-yl] benzoate	CC1=C2C(C(=O)C34CC3CC5C(C4C(C(C2(C)C)(CC1OC(=O)C(C(C6=CC=CC=C6)NC(=O)OC(C)(C)C)O)O)OC(=O)C7=CC=CC=C7)(CO5)OC(=O)C)OC(=O)C		TUBA1C
[(1S,2S,3R,4S,7R,9S,11R,13R,16S)-4,13-diacetyloxy-1-hydroxy-16-[(2R,3S)-2-hydroxy-3-[(2-methylpropan-2-yl)oxycarbonylamino]-3-phenylpropanoyl]oxy-15,18,18-trimethyl-12-oxo-6-oxapentacyclo[12.3.1.03,11.04,7.09,11]octadec-14-en-2-yl] benzoate	CC1=C2C(C(=O)C34CC3CC5C(C4C(C(C2(C)C)(CC1OC(=O)C(C(C6=CC=CC=C6)NC(=O)OC(C)(C)C)O)O)OC(=O)C7=CC=CC=C7)(CO5)OC(=O)C)OC(=O)C		TUBA3C
[(1S,2S,3R,4S,7R,9S,11R,13R,16S)-4,13-diacetyloxy-1-hydroxy-16-[(2R,3S)-2-hydroxy-3-[(2-methylpropan-2-yl)oxycarbonylamino]-3-phenylpropanoyl]oxy-15,18,18-trimethyl-12-oxo-6-oxapentacyclo[12.3.1.03,11.04,7.09,11]octadec-14-en-2-yl] benzoate	CC1=C2C(C(=O)C34CC3CC5C(C4C(C(C2(C)C)(CC1OC(=O)C(C(C6=CC=CC=C6)NC(=O)OC(C)(C)C)O)O)OC(=O)C7=CC=CC=C7)(CO5)OC(=O)C)OC(=O)C		TUBA4A
[(1S,2S,3R,4S,7R,9S,11R,13R,16S)-4,13-diacetyloxy-1-hydroxy-16-[(2R,3S)-2-hydroxy-3-[(2-methylpropan-2-yl)oxycarbonylamino]-3-phenylpropanoyl]oxy-15,18,18-trimethyl-12-oxo-6-oxapentacyclo[12.3.1.03,11.04,7.09,11]octadec-14-en-2-yl] benzoate	CC1=C2C(C(=O)C34CC3CC5C(C4C(C(C2(C)C)(CC1OC(=O)C(C(C6=CC=CC=C6)NC(=O)OC(C)(C)C)O)O)OC(=O)C7=CC=CC=C7)(CO5)OC(=O)C)OC(=O)C		TUBB2A
[(1S,2S,3R,4S,7R,9S,11R,13R,16S)-4,13-diacetyloxy-1-hydroxy-16-[(2R,3S)-2-hydroxy-3-[(2-methylpropan-2-yl)oxycarbonylamino]-3-phenylpropanoyl]oxy-15,18,18-trimethyl-12-oxo-6-oxapentacyclo[12.3.1.03,11.04,7.09,11]octadec-14-en-2-yl] benzoate	CC1=C2C(C(=O)C34CC3CC5C(C4C(C(C2(C)C)(CC1OC(=O)C(C(C6=CC=CC=C6)NC(=O)OC(C)(C)C)O)O)OC(=O)C7=CC=CC=C7)(CO5)OC(=O)C)OC(=O)C		TUBB2B
[(1S,2S,3R,4S,7R,9S,11R,13R,16S)-4,13-diacetyloxy-1-hydroxy-16-[(2R,3S)-2-hydroxy-3-[(2-methylpropan-2-yl)oxycarbonylamino]-3-phenylpropanoyl]oxy-15,18,18-trimethyl-12-oxo-6-oxapentacyclo[12.3.1.03,11.04,7.09,11]octadec-14-en-2-yl] benzoate	CC1=C2C(C(=O)C34CC3CC5C(C4C(C(C2(C)C)(CC1OC(=O)C(C(C6=CC=CC=C6)NC(=O)OC(C)(C)C)O)O)OC(=O)C7=CC=CC=C7)(CO5)OC(=O)C)OC(=O)C		TUBB3
[(1S,2S,3R,4S,7R,9S,11R,13R,16S)-4,13-diacetyloxy-1-hydroxy-16-[(2R,3S)-2-hydroxy-3-[(2-methylpropan-2-yl)oxycarbonylamino]-3-phenylpropanoyl]oxy-15,18,18-trimethyl-12-oxo-6-oxapentacyclo[12.3.1.03,11.04,7.09,11]octadec-14-en-2-yl] benzoate	CC1=C2C(C(=O)C34CC3CC5C(C4C(C(C2(C)C)(CC1OC(=O)C(C(C6=CC=CC=C6)NC(=O)OC(C)(C)C)O)O)OC(=O)C7=CC=CC=C7)(CO5)OC(=O)C)OC(=O)C		TUBB4A
[(1S,2S,3R,4S,7R,9S,11R,13R,16S)-4,13-diacetyloxy-1-hydroxy-16-[(2R,3S)-2-hydroxy-3-[(2-methylpropan-2-yl)oxycarbonylamino]-3-phenylpropanoyl]oxy-15,18,18-trimethyl-12-oxo-6-oxapentacyclo[12.3.1.03,11.04,7.09,11]octadec-14-en-2-yl] benzoate	CC1=C2C(C(=O)C34CC3CC5C(C4C(C(C2(C)C)(CC1OC(=O)C(C(C6=CC=CC=C6)NC(=O)OC(C)(C)C)O)O)OC(=O)C7=CC=CC=C7)(CO5)OC(=O)C)OC(=O)C		TUBB6
[(1S,2S,3R,4S,7R,9S,10S,12R,15S)-4,12-diacetyloxy-15-[(2R,3S)-3-benzamido-2-hydroxy-3-phenylpropanoyl]oxy-1,9-dihydroxy-10,14,17,17-tetramethyl-11-oxo-6-oxatetracyclo[11.3.1.03,10.04,7]heptadec-13-en-2-yl] benzoate	CC1=C2C(C(=O)C3(C(CC4C(C3C(C(C2(C)C)(CC1OC(=O)C(C(C5=CC=CC=C5)NC(=O)C6=CC=CC=C6)O)O)OC(=O)C7=CC=CC=C7)(CO4)OC(=O)C)O)C)OC(=O)C		BCL2
[(1S,2S,3R,4S,7R,9S,10S,12R,15S)-4,12-diacetyloxy-15-[(2R,3S)-3-benzamido-2-hydroxy-3-phenylpropanoyl]oxy-1,9-dihydroxy-10,14,17,17-tetramethyl-11-oxo-6-oxatetracyclo[11.3.1.03,10.04,7]heptadec-13-en-2-yl] benzoate	CC1=C2C(C(=O)C3(C(CC4C(C3C(C(C2(C)C)(CC1OC(=O)C(C(C5=CC=CC=C5)NC(=O)C6=CC=CC=C6)O)O)OC(=O)C7=CC=CC=C7)(CO4)OC(=O)C)O)C)OC(=O)C		TUBA1A
[(1S,2S,3R,4S,7R,9S,10S,12R,15S)-4,12-diacetyloxy-15-[(2R,3S)-3-benzamido-2-hydroxy-3-phenylpropanoyl]oxy-1,9-dihydroxy-10,14,17,17-tetramethyl-11-oxo-6-oxatetracyclo[11.3.1.03,10.04,7]heptadec-13-en-2-yl] benzoate	CC1=C2C(C(=O)C3(C(CC4C(C3C(C(C2(C)C)(CC1OC(=O)C(C(C5=CC=CC=C5)NC(=O)C6=CC=CC=C6)O)O)OC(=O)C7=CC=CC=C7)(CO4)OC(=O)C)O)C)OC(=O)C		TUBA1C
[(1S,2S,3R,4S,7R,9S,10S,12R,15S)-4,12-diacetyloxy-15-[(2R,3S)-3-benzamido-2-hydroxy-3-phenylpropanoyl]oxy-1,9-dihydroxy-10,14,17,17-tetramethyl-11-oxo-6-oxatetracyclo[11.3.1.03,10.04,7]heptadec-13-en-2-yl] benzoate	CC1=C2C(C(=O)C3(C(CC4C(C3C(C(C2(C)C)(CC1OC(=O)C(C(C5=CC=CC=C5)NC(=O)C6=CC=CC=C6)O)O)OC(=O)C7=CC=CC=C7)(CO4)OC(=O)C)O)C)OC(=O)C		TUBA3C
[(1S,2S,3R,4S,7R,9S,10S,12R,15S)-4,12-diacetyloxy-15-[(2R,3S)-3-benzamido-2-hydroxy-3-phenylpropanoyl]oxy-1,9-dihydroxy-10,14,17,17-tetramethyl-11-oxo-6-oxatetracyclo[11.3.1.03,10.04,7]heptadec-13-en-2-yl] benzoate	CC1=C2C(C(=O)C3(C(CC4C(C3C(C(C2(C)C)(CC1OC(=O)C(C(C5=CC=CC=C5)NC(=O)C6=CC=CC=C6)O)O)OC(=O)C7=CC=CC=C7)(CO4)OC(=O)C)O)C)OC(=O)C		TUBA4A
[(1S,2S,3R,4S,7R,9S,10S,12R,15S)-4,12-diacetyloxy-15-[(2R,3S)-3-benzamido-2-hydroxy-3-phenylpropanoyl]oxy-1,9-dihydroxy-10,14,17,17-tetramethyl-11-oxo-6-oxatetracyclo[11.3.1.03,10.04,7]heptadec-13-en-2-yl] benzoate	CC1=C2C(C(=O)C3(C(CC4C(C3C(C(C2(C)C)(CC1OC(=O)C(C(C5=CC=CC=C5)NC(=O)C6=CC=CC=C6)O)O)OC(=O)C7=CC=CC=C7)(CO4)OC(=O)C)O)C)OC(=O)C		TUBB2A
[(1S,2S,3R,4S,7R,9S,10S,12R,15S)-4,12-diacetyloxy-15-[(2R,3S)-3-benzamido-2-hydroxy-3-phenylpropanoyl]oxy-1,9-dihydroxy-10,14,17,17-tetramethyl-11-oxo-6-oxatetracyclo[11.3.1.03,10.04,7]heptadec-13-en-2-yl] benzoate	CC1=C2C(C(=O)C3(C(CC4C(C3C(C(C2(C)C)(CC1OC(=O)C(C(C5=CC=CC=C5)NC(=O)C6=CC=CC=C6)O)O)OC(=O)C7=CC=CC=C7)(CO4)OC(=O)C)O)C)OC(=O)C		TUBB2B
[(1S,2S,3R,4S,7R,9S,10S,12R,15S)-4,12-diacetyloxy-15-[(2R,3S)-3-benzamido-2-hydroxy-3-phenylpropanoyl]oxy-1,9-dihydroxy-10,14,17,17-tetramethyl-11-oxo-6-oxatetracyclo[11.3.1.03,10.04,7]heptadec-13-en-2-yl] benzoate	CC1=C2C(C(=O)C3(C(CC4C(C3C(C(C2(C)C)(CC1OC(=O)C(C(C5=CC=CC=C5)NC(=O)C6=CC=CC=C6)O)O)OC(=O)C7=CC=CC=C7)(CO4)OC(=O)C)O)C)OC(=O)C		TUBB3
[(1S,2S,3R,4S,7R,9S,10S,12R,15S)-4,12-diacetyloxy-15-[(2R,3S)-3-benzamido-2-hydroxy-3-phenylpropanoyl]oxy-1,9-dihydroxy-10,14,17,17-tetramethyl-11-oxo-6-oxatetracyclo[11.3.1.03,10.04,7]heptadec-13-en-2-yl] benzoate	CC1=C2C(C(=O)C3(C(CC4C(C3C(C(C2(C)C)(CC1OC(=O)C(C(C5=CC=CC=C5)NC(=O)C6=CC=CC=C6)O)O)OC(=O)C7=CC=CC=C7)(CO4)OC(=O)C)O)C)OC(=O)C		TUBB4A
[(1S,2S,3R,4S,7R,9S,10S,12R,15S)-4,12-diacetyloxy-15-[(2R,3S)-3-benzamido-2-hydroxy-3-phenylpropanoyl]oxy-1,9-dihydroxy-10,14,17,17-tetramethyl-11-oxo-6-oxatetracyclo[11.3.1.03,10.04,7]heptadec-13-en-2-yl] benzoate	CC1=C2C(C(=O)C3(C(CC4C(C3C(C(C2(C)C)(CC1OC(=O)C(C(C5=CC=CC=C5)NC(=O)C6=CC=CC=C6)O)O)OC(=O)C7=CC=CC=C7)(CO4)OC(=O)C)O)C)OC(=O)C		TUBB6
[(1S,2S,3R,4S,7R,9S,10S,12R,15S)-4-acetyloxy-1-hydroxy-15-[(2R,3S)-2-hydroxy-3-[(2-methylpropan-2-yl)oxycarbonylamino]-3-phenylpropanoyl]oxy-9,12-dimethoxy-10,14,17,17-tetramethyl-11-oxo-6-oxatetracyclo[11.3.1.03,10.04,7]heptadec-13-en-2-yl] benzoate	CC1=C2C(C(=O)C3(C(CC4C(C3C(C(C2(C)C)(CC1OC(=O)C(C(C5=CC=CC=C5)NC(=O)OC(C)(C)C)O)O)OC(=O)C6=CC=CC=C6)(CO4)OC(=O)C)OC)C)OC		TUBA1A
[(1S,2S,3R,4S,7R,9S,10S,12R,15S)-4-acetyloxy-1-hydroxy-15-[(2R,3S)-2-hydroxy-3-[(2-methylpropan-2-yl)oxycarbonylamino]-3-phenylpropanoyl]oxy-9,12-dimethoxy-10,14,17,17-tetramethyl-11-oxo-6-oxatetracyclo[11.3.1.03,10.04,7]heptadec-13-en-2-yl] benzoate	CC1=C2C(C(=O)C3(C(CC4C(C3C(C(C2(C)C)(CC1OC(=O)C(C(C5=CC=CC=C5)NC(=O)OC(C)(C)C)O)O)OC(=O)C6=CC=CC=C6)(CO4)OC(=O)C)OC)C)OC		TUBA1C
[(1S,2S,3R,4S,7R,9S,10S,12R,15S)-4-acetyloxy-1-hydroxy-15-[(2R,3S)-2-hydroxy-3-[(2-methylpropan-2-yl)oxycarbonylamino]-3-phenylpropanoyl]oxy-9,12-dimethoxy-10,14,17,17-tetramethyl-11-oxo-6-oxatetracyclo[11.3.1.03,10.04,7]heptadec-13-en-2-yl] benzoate	CC1=C2C(C(=O)C3(C(CC4C(C3C(C(C2(C)C)(CC1OC(=O)C(C(C5=CC=CC=C5)NC(=O)OC(C)(C)C)O)O)OC(=O)C6=CC=CC=C6)(CO4)OC(=O)C)OC)C)OC		TUBA3C
[(1S,2S,3R,4S,7R,9S,10S,12R,15S)-4-acetyloxy-1-hydroxy-15-[(2R,3S)-2-hydroxy-3-[(2-methylpropan-2-yl)oxycarbonylamino]-3-phenylpropanoyl]oxy-9,12-dimethoxy-10,14,17,17-tetramethyl-11-oxo-6-oxatetracyclo[11.3.1.03,10.04,7]heptadec-13-en-2-yl] benzoate	CC1=C2C(C(=O)C3(C(CC4C(C3C(C(C2(C)C)(CC1OC(=O)C(C(C5=CC=CC=C5)NC(=O)OC(C)(C)C)O)O)OC(=O)C6=CC=CC=C6)(CO4)OC(=O)C)OC)C)OC		TUBA4A
[(1S,2S,3R,4S,7R,9S,10S,12R,15S)-4-acetyloxy-1-hydroxy-15-[(2R,3S)-2-hydroxy-3-[(2-methylpropan-2-yl)oxycarbonylamino]-3-phenylpropanoyl]oxy-9,12-dimethoxy-10,14,17,17-tetramethyl-11-oxo-6-oxatetracyclo[11.3.1.03,10.04,7]heptadec-13-en-2-yl] benzoate	CC1=C2C(C(=O)C3(C(CC4C(C3C(C(C2(C)C)(CC1OC(=O)C(C(C5=CC=CC=C5)NC(=O)OC(C)(C)C)O)O)OC(=O)C6=CC=CC=C6)(CO4)OC(=O)C)OC)C)OC		TUBB2A
[(1S,2S,3R,4S,7R,9S,10S,12R,15S)-4-acetyloxy-1-hydroxy-15-[(2R,3S)-2-hydroxy-3-[(2-methylpropan-2-yl)oxycarbonylamino]-3-phenylpropanoyl]oxy-9,12-dimethoxy-10,14,17,17-tetramethyl-11-oxo-6-oxatetracyclo[11.3.1.03,10.04,7]heptadec-13-en-2-yl] benzoate	CC1=C2C(C(=O)C3(C(CC4C(C3C(C(C2(C)C)(CC1OC(=O)C(C(C5=CC=CC=C5)NC(=O)OC(C)(C)C)O)O)OC(=O)C6=CC=CC=C6)(CO4)OC(=O)C)OC)C)OC		TUBB2B
[(1S,2S,3R,4S,7R,9S,10S,12R,15S)-4-acetyloxy-1-hydroxy-15-[(2R,3S)-2-hydroxy-3-[(2-methylpropan-2-yl)oxycarbonylamino]-3-phenylpropanoyl]oxy-9,12-dimethoxy-10,14,17,17-tetramethyl-11-oxo-6-oxatetracyclo[11.3.1.03,10.04,7]heptadec-13-en-2-yl] benzoate	CC1=C2C(C(=O)C3(C(CC4C(C3C(C(C2(C)C)(CC1OC(=O)C(C(C5=CC=CC=C5)NC(=O)OC(C)(C)C)O)O)OC(=O)C6=CC=CC=C6)(CO4)OC(=O)C)OC)C)OC		TUBB3
[(1S,2S,3R,4S,7R,9S,10S,12R,15S)-4-acetyloxy-1-hydroxy-15-[(2R,3S)-2-hydroxy-3-[(2-methylpropan-2-yl)oxycarbonylamino]-3-phenylpropanoyl]oxy-9,12-dimethoxy-10,14,17,17-tetramethyl-11-oxo-6-oxatetracyclo[11.3.1.03,10.04,7]heptadec-13-en-2-yl] benzoate	CC1=C2C(C(=O)C3(C(CC4C(C3C(C(C2(C)C)(CC1OC(=O)C(C(C5=CC=CC=C5)NC(=O)OC(C)(C)C)O)O)OC(=O)C6=CC=CC=C6)(CO4)OC(=O)C)OC)C)OC		TUBB4A
[(1S,2S,3R,4S,7R,9S,10S,12R,15S)-4-acetyloxy-1-hydroxy-15-[(2R,3S)-2-hydroxy-3-[(2-methylpropan-2-yl)oxycarbonylamino]-3-phenylpropanoyl]oxy-9,12-dimethoxy-10,14,17,17-tetramethyl-11-oxo-6-oxatetracyclo[11.3.1.03,10.04,7]heptadec-13-en-2-yl] benzoate	CC1=C2C(C(=O)C3(C(CC4C(C3C(C(C2(C)C)(CC1OC(=O)C(C(C5=CC=CC=C5)NC(=O)OC(C)(C)C)O)O)OC(=O)C6=CC=CC=C6)(CO4)OC(=O)C)OC)C)OC		TUBB6
[(1S,2S,3R,4S,7R,9S,10S,12R,15S)-4-acetyloxy-1,9,12-trihydroxy-15-[(2R,3S)-2-hydroxy-3-[(2-methylpropan-2-yl)oxycarbonylamino]-3-phenylpropanoyl]oxy-10,14,17,17-tetramethyl-11-oxo-6-oxatetracyclo[11.3.1.03,10.04,7]heptadec-13-en-2-yl] benzoate	CC1=C2C(C(=O)C3(C(CC4C(C3C(C(C2(C)C)(CC1OC(=O)C(C(C5=CC=CC=C5)NC(=O)OC(C)(C)C)O)O)OC(=O)C6=CC=CC=C6)(CO4)OC(=O)C)O)C)O		TUBA1A
[(1S,2S,3R,4S,7R,9S,10S,12R,15S)-4-acetyloxy-1,9,12-trihydroxy-15-[(2R,3S)-2-hydroxy-3-[(2-methylpropan-2-yl)oxycarbonylamino]-3-phenylpropanoyl]oxy-10,14,17,17-tetramethyl-11-oxo-6-oxatetracyclo[11.3.1.03,10.04,7]heptadec-13-en-2-yl] benzoate	CC1=C2C(C(=O)C3(C(CC4C(C3C(C(C2(C)C)(CC1OC(=O)C(C(C5=CC=CC=C5)NC(=O)OC(C)(C)C)O)O)OC(=O)C6=CC=CC=C6)(CO4)OC(=O)C)O)C)O		TUBA1C
[(1S,2S,3R,4S,7R,9S,10S,12R,15S)-4-acetyloxy-1,9,12-trihydroxy-15-[(2R,3S)-2-hydroxy-3-[(2-methylpropan-2-yl)oxycarbonylamino]-3-phenylpropanoyl]oxy-10,14,17,17-tetramethyl-11-oxo-6-oxatetracyclo[11.3.1.03,10.04,7]heptadec-13-en-2-yl] benzoate	CC1=C2C(C(=O)C3(C(CC4C(C3C(C(C2(C)C)(CC1OC(=O)C(C(C5=CC=CC=C5)NC(=O)OC(C)(C)C)O)O)OC(=O)C6=CC=CC=C6)(CO4)OC(=O)C)O)C)O		TUBA3C
[(1S,2S,3R,4S,7R,9S,10S,12R,15S)-4-acetyloxy-1,9,12-trihydroxy-15-[(2R,3S)-2-hydroxy-3-[(2-methylpropan-2-yl)oxycarbonylamino]-3-phenylpropanoyl]oxy-10,14,17,17-tetramethyl-11-oxo-6-oxatetracyclo[11.3.1.03,10.04,7]heptadec-13-en-2-yl] benzoate	CC1=C2C(C(=O)C3(C(CC4C(C3C(C(C2(C)C)(CC1OC(=O)C(C(C5=CC=CC=C5)NC(=O)OC(C)(C)C)O)O)OC(=O)C6=CC=CC=C6)(CO4)OC(=O)C)O)C)O		TUBA4A
[(1S,2S,3R,4S,7R,9S,10S,12R,15S)-4-acetyloxy-1,9,12-trihydroxy-15-[(2R,3S)-2-hydroxy-3-[(2-methylpropan-2-yl)oxycarbonylamino]-3-phenylpropanoyl]oxy-10,14,17,17-tetramethyl-11-oxo-6-oxatetracyclo[11.3.1.03,10.04,7]heptadec-13-en-2-yl] benzoate	CC1=C2C(C(=O)C3(C(CC4C(C3C(C(C2(C)C)(CC1OC(=O)C(C(C5=CC=CC=C5)NC(=O)OC(C)(C)C)O)O)OC(=O)C6=CC=CC=C6)(CO4)OC(=O)C)O)C)O		TUBB2A
[(1S,2S,3R,4S,7R,9S,10S,12R,15S)-4-acetyloxy-1,9,12-trihydroxy-15-[(2R,3S)-2-hydroxy-3-[(2-methylpropan-2-yl)oxycarbonylamino]-3-phenylpropanoyl]oxy-10,14,17,17-tetramethyl-11-oxo-6-oxatetracyclo[11.3.1.03,10.04,7]heptadec-13-en-2-yl] benzoate	CC1=C2C(C(=O)C3(C(CC4C(C3C(C(C2(C)C)(CC1OC(=O)C(C(C5=CC=CC=C5)NC(=O)OC(C)(C)C)O)O)OC(=O)C6=CC=CC=C6)(CO4)OC(=O)C)O)C)O		TUBB2B
[(1S,2S,3R,4S,7R,9S,10S,12R,15S)-4-acetyloxy-1,9,12-trihydroxy-15-[(2R,3S)-2-hydroxy-3-[(2-methylpropan-2-yl)oxycarbonylamino]-3-phenylpropanoyl]oxy-10,14,17,17-tetramethyl-11-oxo-6-oxatetracyclo[11.3.1.03,10.04,7]heptadec-13-en-2-yl] benzoate	CC1=C2C(C(=O)C3(C(CC4C(C3C(C(C2(C)C)(CC1OC(=O)C(C(C5=CC=CC=C5)NC(=O)OC(C)(C)C)O)O)OC(=O)C6=CC=CC=C6)(CO4)OC(=O)C)O)C)O		TUBB3
[(1S,2S,3R,4S,7R,9S,10S,12R,15S)-4-acetyloxy-1,9,12-trihydroxy-15-[(2R,3S)-2-hydroxy-3-[(2-methylpropan-2-yl)oxycarbonylamino]-3-phenylpropanoyl]oxy-10,14,17,17-tetramethyl-11-oxo-6-oxatetracyclo[11.3.1.03,10.04,7]heptadec-13-en-2-yl] benzoate	CC1=C2C(C(=O)C3(C(CC4C(C3C(C(C2(C)C)(CC1OC(=O)C(C(C5=CC=CC=C5)NC(=O)OC(C)(C)C)O)O)OC(=O)C6=CC=CC=C6)(CO4)OC(=O)C)O)C)O		TUBB4A
[(1S,2S,3R,4S,7R,9S,10S,12R,15S)-4-acetyloxy-1,9,12-trihydroxy-15-[(2R,3S)-2-hydroxy-3-[(2-methylpropan-2-yl)oxycarbonylamino]-3-phenylpropanoyl]oxy-10,14,17,17-tetramethyl-11-oxo-6-oxatetracyclo[11.3.1.03,10.04,7]heptadec-13-en-2-yl] benzoate	CC1=C2C(C(=O)C3(C(CC4C(C3C(C(C2(C)C)(CC1OC(=O)C(C(C5=CC=CC=C5)NC(=O)OC(C)(C)C)O)O)OC(=O)C6=CC=CC=C6)(CO4)OC(=O)C)O)C)O		TUBB6
[(1S,2S,3R,4S,7R,9S,10S,12R,15S)-12-acetyloxy-1,9-dihydroxy-15-[(2R,3S)-2-hydroxy-4,4-dimethyl-3-[(2-methylpropan-2-yl)oxycarbonylamino]pentanoyl]oxy-4-methoxycarbonyloxy-10,14,17,17-tetramethyl-11-oxo-6-oxatetracyclo[11.3.1.03,10.04,7]heptadec-13-en-2-yl] benzoate	CC1=C2C(C(=O)C3(C(CC4C(C3C(C(C2(C)C)(CC1OC(=O)C(C(C(C)(C)C)NC(=O)OC(C)(C)C)O)O)OC(=O)C5=CC=CC=C5)(CO4)OC(=O)OC)O)C)OC(=O)C		TUBA1A
[(1S,2S,3R,4S,7R,9S,10S,12R,15S)-12-acetyloxy-1,9-dihydroxy-15-[(2R,3S)-2-hydroxy-4,4-dimethyl-3-[(2-methylpropan-2-yl)oxycarbonylamino]pentanoyl]oxy-4-methoxycarbonyloxy-10,14,17,17-tetramethyl-11-oxo-6-oxatetracyclo[11.3.1.03,10.04,7]heptadec-13-en-2-yl] benzoate	CC1=C2C(C(=O)C3(C(CC4C(C3C(C(C2(C)C)(CC1OC(=O)C(C(C(C)(C)C)NC(=O)OC(C)(C)C)O)O)OC(=O)C5=CC=CC=C5)(CO4)OC(=O)OC)O)C)OC(=O)C		TUBA1C
[(1S,2S,3R,4S,7R,9S,10S,12R,15S)-12-acetyloxy-1,9-dihydroxy-15-[(2R,3S)-2-hydroxy-4,4-dimethyl-3-[(2-methylpropan-2-yl)oxycarbonylamino]pentanoyl]oxy-4-methoxycarbonyloxy-10,14,17,17-tetramethyl-11-oxo-6-oxatetracyclo[11.3.1.03,10.04,7]heptadec-13-en-2-yl] benzoate	CC1=C2C(C(=O)C3(C(CC4C(C3C(C(C2(C)C)(CC1OC(=O)C(C(C(C)(C)C)NC(=O)OC(C)(C)C)O)O)OC(=O)C5=CC=CC=C5)(CO4)OC(=O)OC)O)C)OC(=O)C		TUBA3C
[(1S,2S,3R,4S,7R,9S,10S,12R,15S)-12-acetyloxy-1,9-dihydroxy-15-[(2R,3S)-2-hydroxy-4,4-dimethyl-3-[(2-methylpropan-2-yl)oxycarbonylamino]pentanoyl]oxy-4-methoxycarbonyloxy-10,14,17,17-tetramethyl-11-oxo-6-oxatetracyclo[11.3.1.03,10.04,7]heptadec-13-en-2-yl] benzoate	CC1=C2C(C(=O)C3(C(CC4C(C3C(C(C2(C)C)(CC1OC(=O)C(C(C(C)(C)C)NC(=O)OC(C)(C)C)O)O)OC(=O)C5=CC=CC=C5)(CO4)OC(=O)OC)O)C)OC(=O)C		TUBA4A
[(1S,2S,3R,4S,7R,9S,10S,12R,15S)-12-acetyloxy-1,9-dihydroxy-15-[(2R,3S)-2-hydroxy-4,4-dimethyl-3-[(2-methylpropan-2-yl)oxycarbonylamino]pentanoyl]oxy-4-methoxycarbonyloxy-10,14,17,17-tetramethyl-11-oxo-6-oxatetracyclo[11.3.1.03,10.04,7]heptadec-13-en-2-yl] benzoate	CC1=C2C(C(=O)C3(C(CC4C(C3C(C(C2(C)C)(CC1OC(=O)C(C(C(C)(C)C)NC(=O)OC(C)(C)C)O)O)OC(=O)C5=CC=CC=C5)(CO4)OC(=O)OC)O)C)OC(=O)C		TUBB2A
[(1S,2S,3R,4S,7R,9S,10S,12R,15S)-12-acetyloxy-1,9-dihydroxy-15-[(2R,3S)-2-hydroxy-4,4-dimethyl-3-[(2-methylpropan-2-yl)oxycarbonylamino]pentanoyl]oxy-4-methoxycarbonyloxy-10,14,17,17-tetramethyl-11-oxo-6-oxatetracyclo[11.3.1.03,10.04,7]heptadec-13-en-2-yl] benzoate	CC1=C2C(C(=O)C3(C(CC4C(C3C(C(C2(C)C)(CC1OC(=O)C(C(C(C)(C)C)NC(=O)OC(C)(C)C)O)O)OC(=O)C5=CC=CC=C5)(CO4)OC(=O)OC)O)C)OC(=O)C		TUBB2B
[(1S,2S,3R,4S,7R,9S,10S,12R,15S)-12-acetyloxy-1,9-dihydroxy-15-[(2R,3S)-2-hydroxy-4,4-dimethyl-3-[(2-methylpropan-2-yl)oxycarbonylamino]pentanoyl]oxy-4-methoxycarbonyloxy-10,14,17,17-tetramethyl-11-oxo-6-oxatetracyclo[11.3.1.03,10.04,7]heptadec-13-en-2-yl] benzoate	CC1=C2C(C(=O)C3(C(CC4C(C3C(C(C2(C)C)(CC1OC(=O)C(C(C(C)(C)C)NC(=O)OC(C)(C)C)O)O)OC(=O)C5=CC=CC=C5)(CO4)OC(=O)OC)O)C)OC(=O)C		TUBB3
[(1S,2S,3R,4S,7R,9S,10S,12R,15S)-12-acetyloxy-1,9-dihydroxy-15-[(2R,3S)-2-hydroxy-4,4-dimethyl-3-[(2-methylpropan-2-yl)oxycarbonylamino]pentanoyl]oxy-4-methoxycarbonyloxy-10,14,17,17-tetramethyl-11-oxo-6-oxatetracyclo[11.3.1.03,10.04,7]heptadec-13-en-2-yl] benzoate	CC1=C2C(C(=O)C3(C(CC4C(C3C(C(C2(C)C)(CC1OC(=O)C(C(C(C)(C)C)NC(=O)OC(C)(C)C)O)O)OC(=O)C5=CC=CC=C5)(CO4)OC(=O)OC)O)C)OC(=O)C		TUBB4A
[(1S,2S,3R,4S,7R,9S,10S,12R,15S)-12-acetyloxy-1,9-dihydroxy-15-[(2R,3S)-2-hydroxy-4,4-dimethyl-3-[(2-methylpropan-2-yl)oxycarbonylamino]pentanoyl]oxy-4-methoxycarbonyloxy-10,14,17,17-tetramethyl-11-oxo-6-oxatetracyclo[11.3.1.03,10.04,7]heptadec-13-en-2-yl] benzoate	CC1=C2C(C(=O)C3(C(CC4C(C3C(C(C2(C)C)(CC1OC(=O)C(C(C(C)(C)C)NC(=O)OC(C)(C)C)O)O)OC(=O)C5=CC=CC=C5)(CO4)OC(=O)OC)O)C)OC(=O)C		TUBB6
methyl (1S,15R,16S,20S)-16-methyl-17-oxa-3,13-diazapentacyclo[11.8.0.02,10.04,9.015,20]henicosa-2(10),4,6,8,18-pentaene-19-carboxylate	CC1C2CN3CCC4=C(C3CC2C(=CO1)C(=O)OC)NC5=CC=CC=C45		ADRA1B
methyl (1S,15R,16S,20S)-16-methyl-17-oxa-3,13-diazapentacyclo[11.8.0.02,10.04,9.015,20]henicosa-2(10),4,6,8,18-pentaene-19-carboxylate	CC1C2CN3CCC4=C(C3CC2C(=CO1)C(=O)OC)NC5=CC=CC=C45		ADRA2C
4-[4-[3-[2-(tert-butylamino)ethylamino]-6-[5-(trifluoromethyl)-4H-pyrazol-3-yl]pyridin-2-yl]piperidin-1-yl]-5,5-dimethyl-7H-pyrrolo[2,3-d]pyrimidin-6-one	CC1(C2=C(NC1=O)N=CN=C2N3CCC(CC3)C4=C(C=CC(=N4)C5=NN=C(C5)C(F)(F)F)NCCNC(C)(C)C)C		AKT1
4-[4-[3-[2-(tert-butylamino)ethylamino]-6-[5-(trifluoromethyl)-4H-pyrazol-3-yl]pyridin-2-yl]piperidin-1-yl]-5,5-dimethyl-7H-pyrrolo[2,3-d]pyrimidin-6-one	CC1(C2=C(NC1=O)N=CN=C2N3CCC(CC3)C4=C(C=CC(=N4)C5=NN=C(C5)C(F)(F)F)NCCNC(C)(C)C)C		AKT2
4-[4-[3-[2-(tert-butylamino)ethylamino]-6-[5-(trifluoromethyl)-4H-pyrazol-3-yl]pyridin-2-yl]piperidin-1-yl]-5,5-dimethyl-7H-pyrrolo[2,3-d]pyrimidin-6-one	CC1(C2=C(NC1=O)N=CN=C2N3CCC(CC3)C4=C(C=CC(=N4)C5=NN=C(C5)C(F)(F)F)NCCNC(C)(C)C)C		AKT3
4-[4-[3-[2-(tert-butylamino)ethylamino]-6-[5-(trifluoromethyl)-4H-pyrazol-3-yl]pyridin-2-yl]piperidin-1-yl]-5,5-dimethyl-7H-pyrrolo[2,3-d]pyrimidin-6-one	CC1(C2=C(NC1=O)N=CN=C2N3CCC(CC3)C4=C(C=CC(=N4)C5=NN=C(C5)C(F)(F)F)NCCNC(C)(C)C)C		RPS6KA1
4-[4-[3-[2-(tert-butylamino)ethylamino]-6-[5-(trifluoromethyl)-4H-pyrazol-3-yl]pyridin-2-yl]piperidin-1-yl]-5,5-dimethyl-7H-pyrrolo[2,3-d]pyrimidin-6-one	CC1(C2=C(NC1=O)N=CN=C2N3CCC(CC3)C4=C(C=CC(=N4)C5=NN=C(C5)C(F)(F)F)NCCNC(C)(C)C)C		RPS6KA2
4-[4-[3-[2-(tert-butylamino)ethylamino]-6-[5-(trifluoromethyl)-4H-pyrazol-3-yl]pyridin-2-yl]piperidin-1-yl]-5,5-dimethyl-7H-pyrrolo[2,3-d]pyrimidin-6-one	CC1(C2=C(NC1=O)N=CN=C2N3CCC(CC3)C4=C(C=CC(=N4)C5=NN=C(C5)C(F)(F)F)NCCNC(C)(C)C)C		RPS6KA6
[(3S)-morpholin-3-yl]methyl N-[4-[[1-[(3-fluorophenyl)methyl]indazol-5-yl]amino]-5-methylpyrrolo[2,1-f][1,2,4]triazin-6-yl]carbamate	CC1=C2C(=NC=NN2C=C1NC(=O)OCC3COCCN3)NC4=CC5=C(C=C4)N(N=C5)CC6=CC(=CC=C6)F		EGFR
[(3S)-morpholin-3-yl]methyl N-[4-[[1-[(3-fluorophenyl)methyl]indazol-5-yl]amino]-5-methylpyrrolo[2,1-f][1,2,4]triazin-6-yl]carbamate	CC1=C2C(=NC=NN2C=C1NC(=O)OCC3COCCN3)NC4=CC5=C(C=C4)N(N=C5)CC6=CC(=CC=C6)F		ERBB2
[(3S)-morpholin-3-yl]methyl N-[4-[[1-[(3-fluorophenyl)methyl]indazol-5-yl]amino]-5-methylpyrrolo[2,1-f][1,2,4]triazin-6-yl]carbamate	CC1=C2C(=NC=NN2C=C1NC(=O)OCC3COCCN3)NC4=CC5=C(C=C4)N(N=C5)CC6=CC(=CC=C6)F		ERBB4
5-(2-chlorophenyl)-7-fluoro-8-methoxy-3-methyl-2,10-dihydropyrazolo[3,4-b][1,4]benzodiazepine	CC1=C2C(=NN1)NC3=CC(=C(C=C3C(=N2)C4=CC=CC=C4Cl)F)OC		FGFR1
5-(2-chlorophenyl)-7-fluoro-8-methoxy-3-methyl-2,10-dihydropyrazolo[3,4-b][1,4]benzodiazepine	CC1=C2C(=NN1)NC3=CC(=C(C=C3C(=N2)C4=CC=CC=C4Cl)F)OC		FGFR2
5-(2-chlorophenyl)-7-fluoro-8-methoxy-3-methyl-2,10-dihydropyrazolo[3,4-b][1,4]benzodiazepine	CC1=C2C(=NN1)NC3=CC(=C(C=C3C(=N2)C4=CC=CC=C4Cl)F)OC		FLT1
5-(2-chlorophenyl)-7-fluoro-8-methoxy-3-methyl-2,10-dihydropyrazolo[3,4-b][1,4]benzodiazepine	CC1=C2C(=NN1)NC3=CC(=C(C=C3C(=N2)C4=CC=CC=C4Cl)F)OC		FLT3
5-(2-chlorophenyl)-7-fluoro-8-methoxy-3-methyl-2,10-dihydropyrazolo[3,4-b][1,4]benzodiazepine	CC1=C2C(=NN1)NC3=CC(=C(C=C3C(=N2)C4=CC=CC=C4Cl)F)OC		FLT4
5-(2-chlorophenyl)-7-fluoro-8-methoxy-3-methyl-2,10-dihydropyrazolo[3,4-b][1,4]benzodiazepine	CC1=C2C(=NN1)NC3=CC(=C(C=C3C(=N2)C4=CC=CC=C4Cl)F)OC		KDR
5-(2-chlorophenyl)-7-fluoro-8-methoxy-3-methyl-2,10-dihydropyrazolo[3,4-b][1,4]benzodiazepine	CC1=C2C(=NN1)NC3=CC(=C(C=C3C(=N2)C4=CC=CC=C4Cl)F)OC		PDGFRB
2-morpholin-4-ylethyl (E)-6-(4-hydroxy-6-methoxy-7-methyl-3-oxo-1H-2-benzofuran-5-yl)-4-methylhex-4-enoate	CC1=C2COC(=O)C2=C(C(=C1OC)CC=C(C)CCC(=O)OCCN3CCOCC3)O		IMPDH1
(E)-6-(4-hydroxy-6-methoxy-7-methyl-3-oxo-1H-2-benzofuran-5-yl)-4-methylhex-4-enoic acid	CC1=C2COC(=O)C2=C(C(=C1OC)CC=C(C)CCC(=O)O)O		IMPDH1
N-[3-[(4aS,5R,7aS)-2-amino-5-methyl-4,4a,5,7-tetrahydrofuro[3,4-d][1,3]thiazin-7a-yl]-4-fluorophenyl]-5-(difluoromethyl)pyrazine-2-carboxamide	CC1C2CSC(=NC2(CO1)C3=C(C=CC(=C3)NC(=O)C4=NC=C(N=C4)C(F)F)F)N		BACE1
5-(6,6-dimethyl-4-morpholin-4-yl-8,9-dihydropurino[8,9-c][1,4]oxazin-2-yl)pyrimidin-2-amine	CC1(C2=NC3=C(N2CCO1)N=C(N=C3N4CCOCC4)C5=CN=C(N=C5)N)C		PIK3CA
5-(6,6-dimethyl-4-morpholin-4-yl-8,9-dihydropurino[8,9-c][1,4]oxazin-2-yl)pyrimidin-2-amine	CC1(C2=NC3=C(N2CCO1)N=C(N=C3N4CCOCC4)C5=CN=C(N=C5)N)C		PIK3CB
5-(6,6-dimethyl-4-morpholin-4-yl-8,9-dihydropurino[8,9-c][1,4]oxazin-2-yl)pyrimidin-2-amine	CC1(C2=NC3=C(N2CCO1)N=C(N=C3N4CCOCC4)C5=CN=C(N=C5)N)C		PIK3CD
5-(6,6-dimethyl-4-morpholin-4-yl-8,9-dihydropurino[8,9-c][1,4]oxazin-2-yl)pyrimidin-2-amine	CC1(C2=NC3=C(N2CCO1)N=C(N=C3N4CCOCC4)C5=CN=C(N=C5)N)C		PIK3CG
5-(6,6-dimethyl-4-morpholin-4-yl-8,9-dihydropurino[8,9-c][1,4]oxazin-2-yl)pyrimidin-2-amine	CC1(C2=NC3=C(N2CCO1)N=C(N=C3N4CCOCC4)C5=CN=C(N=C5)N)C		PIK3R1
5-(6,6-dimethyl-4-morpholin-4-yl-8,9-dihydropurino[8,9-c][1,4]oxazin-2-yl)pyrimidin-2-amine	CC1(C2=NC3=C(N2CCO1)N=C(N=C3N4CCOCC4)C5=CN=C(N=C5)N)C		PIK3R3
5-[3-(1-methylcyclopropyl)propyl]-1H-pyrano[2,3-d]pyrimidine-2,4,7-trione	CC1(CC1)CCCC2=CC(=O)OC3=C2C(=O)NC(=O)N3		HCAR2
(Z)-7-[(2R)-2-amino-2-carboxyethyl]sulfanyl-2-[[(1S)-2,2-dimethylcyclopropanecarbonyl]amino]hept-2-enoic acid	CC1(CC1C(=O)NC(=CCCCCSCC(C(=O)O)N)C(=O)O)C		DPEP1
(1R,14E,18R,22R,26S,29S)-26-tert-butyl-N-[(1R,2R)-2-(difluoromethyl)-1-[(1-methylcyclopropyl)sulfonylcarbamoyl]cyclopropyl]-13,13-difluoro-24,27-dioxo-2,17,23-trioxa-4,11,25,28-tetrazapentacyclo[26.2.1.03,12.05,10.018,22]hentriaconta-3,5,7,9,11,14-hexaene-29-carboxamide	CC1(CC1)S(=O)(=O)NC(=O)C2(CC2C(F)F)NC(=O)C3CC4CN3C(=O)C(NC(=O)OC5CCCC5OCC=CC(C6=NC7=CC=CC=C7N=C6O4)(F)F)C(C)(C)C		KRAS
[2-[(1S,2R,13S,14S,16R,17R,18S,20S)-17,20-dihydroxy-2,11,16,18-tetramethyl-7-phenyl-6,7-diazapentacyclo[11.7.0.02,10.04,8.014,18]icosa-4(8),5,9,11-tetraen-17-yl]-2-oxoethyl] acetate	CC1CC2C3C=C(C4=CC5=C(CC4(C3C(CC2(C1(C(=O)COC(=O)C)O)C)O)C)C=NN5C6=CC=CC=C6)C		NR3C1
(8S,9R,10S,11S,13S,14S,16R,17R)-9-chloro-17-(2-chloroacetyl)-11,17-dihydroxy-10,13,16-trimethyl-6,7,8,11,12,14,15,16-octahydrocyclopenta[a]phenanthren-3-one	CC1CC2C3CCC4=CC(=O)C=CC4(C3(C(CC2(C1(C(=O)CCl)O)C)O)Cl)C		NR3C1
(6S,8S,9R,10S,11S,13S,14S,16S,17R)-17-(2-chloroacetyl)-6,9-difluoro-11,17-dihydroxy-10,13,16-trimethyl-6,7,8,11,12,14,15,16-octahydrocyclopenta[a]phenanthren-3-one	CC1CC2C3CC(C4=CC(=O)C=CC4(C3(C(CC2(C1(C(=O)CCl)O)C)O)F)C)F		NR3C1
[2-[(6S,8S,9R,10S,11S,13S,14S,16R,17R)-6,9-difluoro-11,17-dihydroxy-10,13,16-trimethyl-3-oxo-6,7,8,11,12,14,15,16-octahydrocyclopenta[a]phenanthren-17-yl]-2-oxoethyl] 2,2-dimethylpropanoate	CC1CC2C3CC(C4=CC(=O)C=CC4(C3(C(CC2(C1(C(=O)COC(=O)C(C)(C)C)O)C)O)F)C)F		NR3C1
(6S,8S,9R,10S,11S,13S,14S,16R,17S)-9-chloro-6-fluoro-11-hydroxy-17-(2-hydroxyacetyl)-10,13,16-trimethyl-7,8,11,12,14,15,16,17-octahydro-6H-cyclopenta[a]phenanthren-3-one	CC1CC2C3CC(C4=CC(=O)C=CC4(C3(C(CC2(C1C(=O)CO)C)O)Cl)C)F		NR3C1
[2-[(6S,8S,9R,10S,11S,13S,14S,16S,17R)-17-acetyloxy-6,9-difluoro-11-hydroxy-10,13,16-trimethyl-3-oxo-6,7,8,11,12,14,15,16-octahydrocyclopenta[a]phenanthren-17-yl]-2-oxoethyl] acetate	CC1CC2C3CC(C4=CC(=O)C=CC4(C3(C(CC2(C1(C(=O)COC(=O)C)OC(=O)C)C)O)F)C)F		NR3C1
[2-[(6S,8S,9S,10R,11S,13S,14S,16R,17R)-6-fluoro-11,17-dihydroxy-10,13,16-trimethyl-3-oxo-7,8,9,11,12,14,15,16-octahydro-6H-cyclopenta[a]phenanthren-17-yl]-2-oxoethyl] acetate	CC1CC2C3CC(C4=CC(=O)C=CC4(C3C(CC2(C1(C(=O)COC(=O)C)O)C)O)C)F		NR3C1
[2-[(8S,9R,10S,11S,13S,14S,16S,17R)-9-fluoro-11,17-dihydroxy-10,13,16-trimethyl-3-oxo-6,7,8,11,12,14,15,16-octahydrocyclopenta[a]phenanthren-17-yl]-2-oxoethyl] acetate	CC1CC2C3CCC4=CC(=O)C=CC4(C3(C(CC2(C1(C(=O)COC(=O)C)O)C)O)F)C		NR3C1
(8S,9R,10S,11S,13S,14S,16R,17S)-9-fluoro-11-hydroxy-17-(2-hydroxyacetyl)-10,13,16-trimethyl-7,8,11,12,14,15,16,17-octahydro-6H-cyclopenta[a]phenanthren-3-one	CC1CC2C3CCC4=CC(=O)C=CC4(C3(C(CC2(C1C(=O)CO)C)O)F)C		NR3C1
[(8S,9R,10S,11S,13S,14S,16S,17R)-9-fluoro-11-hydroxy-17-(2-hydroxyacetyl)-10,13,16-trimethyl-3-oxo-6,7,8,11,12,14,15,16-octahydrocyclopenta[a]phenanthren-17-yl] benzoate	CC1CC2C3CCC4=CC(=O)C=CC4(C3(C(CC2(C1(C(=O)CO)OC(=O)C5=CC=CC=C5)C)O)F)C		NR3C1
(7R,8S,9S,10R,11S,13S,14S,16R,17R)-7-chloro-11,17-dihydroxy-17-(2-hydroxyacetyl)-10,13,16-trimethyl-7,8,9,11,12,14,15,16-octahydro-6H-cyclopenta[a]phenanthren-3-one	CC1CC2C3C(CC4=CC(=O)C=CC4(C3C(CC2(C1(C(=O)CO)O)C)O)C)Cl		NR3C1
9-chloro-11,17-dihydroxy-17-(2-hydroxyacetyl)-10,13,16-trimethyl-6,7,8,11,12,14,15,16-octahydrocyclopenta[a]phenanthren-3-one	CC1CC2C3CCC4=CC(=O)C=CC4(C3(C(CC2(C1(C(=O)CO)O)C)O)Cl)C		NR3C1
(8S,9R,10S,11S,13S,14S,16S,17R)-9-fluoro-11,17-dihydroxy-17-(2-hydroxyacetyl)-10,13,16-trimethyl-6,7,8,11,12,14,15,16-octahydrocyclopenta[a]phenanthren-3-one	CC1CC2C3CCC4=CC(=O)C=CC4(C3(C(CC2(C1(C(=O)CO)O)C)O)F)C		NR3C1
(6S,8S,9R,10S,11S,13S,14S,16R,17R)-6,9-difluoro-11,17-dihydroxy-17-(2-hydroxyacetyl)-10,13,16-trimethyl-6,7,8,11,12,14,15,16-octahydrocyclopenta[a]phenanthren-3-one	CC1CC2C3CC(C4=CC(=O)C=CC4(C3(C(CC2(C1(C(=O)CO)O)C)O)F)C)F		NR3C1
[(6S,8S,9R,10S,11S,13S,14S,16R,17R)-6,9-difluoro-17-(fluoromethylsulfanylcarbonyl)-11-hydroxy-10,13,16-trimethyl-3-oxo-6,7,8,11,12,14,15,16-octahydrocyclopenta[a]phenanthren-17-yl] furan-2-carboxylate	CC1CC2C3CC(C4=CC(=O)C=CC4(C3(C(CC2(C1(C(=O)SCF)OC(=O)C5=CC=CO5)C)O)F)C)F		NR3C1
S-(fluoromethyl) (6S,8S,9R,10S,11S,13S,14S,16R,17R)-6,9-difluoro-11,17-dihydroxy-10,13,16-trimethyl-3-oxo-6,7,8,11,12,14,15,16-octahydrocyclopenta[a]phenanthrene-17-carbothioate	CC1CC2C3CC(C4=CC(=O)C=CC4(C3(C(CC2(C1(C(=O)SCF)O)C)O)F)C)F		NR3C1
(8S,9S,10R,13S,14S,16S,17R)-17-hydroxy-17-(2-hydroxyacetyl)-10,13,16-trimethyl-6,7,8,9,12,14,15,16-octahydrocyclopenta[a]phenanthrene-3,11-dione	CC1CC2C3CCC4=CC(=O)C=CC4(C3C(=O)CC2(C1(C(=O)CO)O)C)C		NR3C1
(6S,8S,9R,10S,11S,13S,14S,17R)-17-acetyl-9-fluoro-11,17-dihydroxy-6,10,13-trimethyl-6,7,8,11,12,14,15,16-octahydrocyclopenta[a]phenanthren-3-one	CC1CC2C3CCC(C3(CC(C2(C4(C1=CC(=O)C=C4)C)F)O)C)(C(=O)C)O		NR3C1
[(6S,8S,9R,10S,11S,13S,14S,17R)-17-acetyl-9-fluoro-11-hydroxy-6,10,13-trimethyl-3-oxo-6,7,8,11,12,14,15,16-octahydrocyclopenta[a]phenanthren-17-yl] acetate	CC1CC2C3CCC(C3(CC(C2(C4(C1=CC(=O)C=C4)C)F)O)C)(C(=O)C)OC(=O)C		NR3C1
(6S,8S,9S,10R,11S,13S,14S,17S)-17-acetyl-11-hydroxy-6,10,13-trimethyl-1,2,6,7,8,9,11,12,14,15,16,17-dodecahydrocyclopenta[a]phenanthren-3-one	CC1CC2C3CCC(C3(CC(C2C4(C1=CC(=O)CC4)C)O)C)C(=O)C		NR3C1
[2-[(6S,8S,9S,10R,11S,13S,14S,17R)-11,17-dihydroxy-6,10,13-trimethyl-3-oxo-7,8,9,11,12,14,15,16-octahydro-6H-cyclopenta[a]phenanthren-17-yl]-2-oxoethyl] acetate	CC1CC2C3CCC(C3(CC(C2C4(C1=CC(=O)C=C4)C)O)C)(C(=O)COC(=O)C)O		NR3C1
(6S,8S,9S,10R,11S,13S,14S,17R)-11,17-dihydroxy-17-(2-hydroxyacetyl)-6,10,13-trimethyl-7,8,9,11,12,14,15,16-octahydro-6H-cyclopenta[a]phenanthren-3-one	CC1CC2C3CCC(C3(CC(C2C4(C1=CC(=O)C=C4)C)O)C)(C(=O)CO)O		NR3C1
2-[(3Z)-6-fluoro-2-methyl-3-[(4-methylsulfinylphenyl)methylidene]inden-1-yl]acetic acid	CC1=C(C2=C(C1=CC3=CC=C(C=C3)S(=O)C)C=CC(=C2)F)CC(=O)O		PTGS1
2-[(3Z)-6-fluoro-2-methyl-3-[(4-methylsulfinylphenyl)methylidene]inden-1-yl]acetic acid	CC1=C(C2=C(C1=CC3=CC=C(C=C3)S(=O)C)C=CC(=C2)F)CC(=O)O		PTGS2
4-[1-(3,5,5,8,8-pentamethyl-6,7-dihydronaphthalen-2-yl)ethenyl]benzoic acid	CC1=CC2=C(C=C1C(=C)C3=CC=C(C=C3)C(=O)O)C(CCC2(C)C)(C)C		RXRA
4-[1-(3,5,5,8,8-pentamethyl-6,7-dihydronaphthalen-2-yl)ethenyl]benzoic acid	CC1=CC2=C(C=C1C(=C)C3=CC=C(C=C3)C(=O)O)C(CCC2(C)C)(C)C		RXRG
N-(4-chloro-3-methyl-1,2-oxazol-5-yl)-2-[2-(6-methyl-1,3-benzodioxol-5-yl)acetyl]thiophene-3-sulfonamide	CC1=CC2=C(C=C1CC(=O)C3=C(C=CS3)S(=O)(=O)NC4=C(C(=NO4)C)Cl)OCO2		EDNRA
N-(4-chloro-3-methyl-1,2-oxazol-5-yl)-2-[2-(6-methyl-1,3-benzodioxol-5-yl)acetyl]thiophene-3-sulfonamide	CC1=CC2=C(C=C1CC(=O)C3=C(C=CS3)S(=O)(=O)NC4=C(C(=NO4)C)Cl)OCO2		EDNRB
4-amino-N-[1-(3-chloro-2-fluoroanilino)-6-methylisoquinolin-5-yl]thieno[3,2-d]pyrimidine-7-carboxamide	CC1=C(C2=C(C=C1)C(=NC=C2)NC3=C(C(=CC=C3)Cl)F)NC(=O)C4=CSC5=C4N=CN=C5N		ARAF
4-amino-N-[1-(3-chloro-2-fluoroanilino)-6-methylisoquinolin-5-yl]thieno[3,2-d]pyrimidine-7-carboxamide	CC1=C(C2=C(C=C1)C(=NC=C2)NC3=C(C(=CC=C3)Cl)F)NC(=O)C4=CSC5=C4N=CN=C5N		BRAF
4-amino-N-[1-(3-chloro-2-fluoroanilino)-6-methylisoquinolin-5-yl]thieno[3,2-d]pyrimidine-7-carboxamide	CC1=C(C2=C(C=C1)C(=NC=C2)NC3=C(C(=CC=C3)Cl)F)NC(=O)C4=CSC5=C4N=CN=C5N		RAF1
N'-(1,8-dimethylimidazo[1,2-a]quinoxalin-4-yl)ethane-1,2-diamine	CC1=CC2=C(C=C1)N=C(C3=NC=C(N23)C)NCCN		IKBKB
2-amino-6-methyl-5-pyridin-4-ylsulfanyl-3H-quinazolin-4-one	CC1=C(C2=C(C=C1)N=C(NC2=O)N)SC3=CC=NC=C3		TYMS
N-(6-methyl-1,3-benzothiazol-2-yl)-2-[(4-oxo-3-phenyl-6,7-dihydrothieno[3,2-d]pyrimidin-2-yl)sulfanyl]acetamide	CC1=CC2=C(C=C1)N=C(S2)NC(=O)CSC3=NC4=C(C(=O)N3C5=CC=CC=C5)SCC4		PORCN
4-[[4-amino-6-(methoxymethyl)-5-(7-methoxy-5-methyl-1-benzothiophen-2-yl)pyrrolo[2,1-f][1,2,4]triazin-7-yl]methyl]piperazin-2-one	CC1=CC2=C(C(=C1)OC)SC(=C2)C3=C4C(=NC=NN4C(=C3COC)CN5CCNC(=O)C5)N		FGFR1
4-[[4-amino-6-(methoxymethyl)-5-(7-methoxy-5-methyl-1-benzothiophen-2-yl)pyrrolo[2,1-f][1,2,4]triazin-7-yl]methyl]piperazin-2-one	CC1=CC2=C(C(=C1)OC)SC(=C2)C3=C4C(=NC=NN4C(=C3COC)CN5CCNC(=O)C5)N		FGFR2
4-[[4-amino-6-(methoxymethyl)-5-(7-methoxy-5-methyl-1-benzothiophen-2-yl)pyrrolo[2,1-f][1,2,4]triazin-7-yl]methyl]piperazin-2-one	CC1=CC2=C(C(=C1)OC)SC(=C2)C3=C4C(=NC=NN4C(=C3COC)CN5CCNC(=O)C5)N		FGFR3
4-[[4-amino-6-(methoxymethyl)-5-(7-methoxy-5-methyl-1-benzothiophen-2-yl)pyrrolo[2,1-f][1,2,4]triazin-7-yl]methyl]piperazin-2-one	CC1=CC2=C(C(=C1)OC)SC(=C2)C3=C4C(=NC=NN4C(=C3COC)CN5CCNC(=O)C5)N		FGFR4
(3S,3'R,3'aS,6'S,6aS,6bS,7'aR,9R,11aS,11bR)-3',6',10,11b-tetramethylspiro[2,3,4,6,6a,6b,7,8,11,11a-decahydro-1H-benzo[a]fluorene-9,2'-3a,4,5,6,7,7a-hexahydro-3H-furo[3,2-b]pyridine]-3-ol	CC1CC2C(C(C3(O2)CCC4C5CC=C6CC(CCC6(C5CC4=C3C)C)O)C)NC1		SMO
N-[(3R,3'R,3'aS,4aR,6'S,6aR,6bS,7'aR,9S,12aS,12bS)-3',6',11,12b-tetramethylspiro[1,2,3,4,4a,5,6,6a,6b,7,8,10,12,12a-tetradecahydronaphtho[2,1-a]azulene-9,2'-3a,4,5,6,7,7a-hexahydro-3H-furo[3,2-b]pyridine]-3-yl]methanesulfonamide	CC1CC2C(C(C3(O2)CCC4C5CCC6CC(CCC6(C5CC4=C(C3)C)C)NS(=O)(=O)C)C)NC1		SMO
(2R,5S,8R,9S,10S,13S,14S,17S)-17-hydroxy-2,10,13-trimethyl-1,2,4,5,6,7,8,9,11,12,14,15,16,17-tetradecahydrocyclopenta[a]phenanthren-3-one	CC1CC2(C(CCC3C2CCC4(C3CCC4O)C)CC1=O)C		AR
N-[1-(3-fluoropropyl)azetidin-3-yl]-6-[(6S,8R)-8-methyl-7-(2,2,2-trifluoroethyl)-3,6,8,9-tetrahydropyrazolo[4,3-f]isoquinolin-6-yl]pyridin-3-amine	CC1CC2=C(C=CC3=C2C=NN3)C(N1CC(F)(F)F)C4=NC=C(C=C4)NC5CN(C5)CCCF		ESR1
2,3,5-trihydroxy-7-methyl-N-[(2R)-2-phenylpropyl]-6-[1,6,7-trihydroxy-3-methyl-5-[[(2R)-2-phenylpropyl]carbamoyl]naphthalen-2-yl]naphthalene-1-carboxamide	CC1=CC2=C(C(=C(C=C2C(=C1C3=C(C4=CC(=C(C(=C4C=C3C)C(=O)NCC(C)C5=CC=CC=C5)O)O)O)O)O)O)C(=O)NCC(C)C6=CC=CC=C6		BCL2
2,3,5-trihydroxy-7-methyl-N-[(2R)-2-phenylpropyl]-6-[1,6,7-trihydroxy-3-methyl-5-[[(2R)-2-phenylpropyl]carbamoyl]naphthalen-2-yl]naphthalene-1-carboxamide	CC1=CC2=C(C(=C(C=C2C(=C1C3=C(C4=CC(=C(C(=C4C=C3C)C(=O)NCC(C)C5=CC=CC=C5)O)O)O)O)O)O)C(=O)NCC(C)C6=CC=CC=C6		BCL2A1
7-(8-formyl-1,6,7-trihydroxy-3-methyl-5-propan-2-ylnaphthalen-2-yl)-2,3,8-trihydroxy-6-methyl-4-propan-2-ylnaphthalene-1-carbaldehyde	CC1=CC2=C(C(=C(C(=C2C(C)C)O)O)C=O)C(=C1C3=C(C4=C(C=C3C)C(=C(C(=C4C=O)O)O)C(C)C)O)O		BCL2
(E)-N-hydroxy-3-[4-[[2-(2-methyl-1H-indol-3-yl)ethylamino]methyl]phenyl]prop-2-enamide	CC1=C(C2=CC=CC=C2N1)CCNCC3=CC=C(C=C3)C=CC(=O)NO		HDAC11
(E)-N-hydroxy-3-[4-[[2-(2-methyl-1H-indol-3-yl)ethylamino]methyl]phenyl]prop-2-enamide	CC1=C(C2=CC=CC=C2N1)CCNCC3=CC=C(C=C3)C=CC(=O)NO		HDAC5
(E)-N-hydroxy-3-[4-[[2-(2-methyl-1H-indol-3-yl)ethylamino]methyl]phenyl]prop-2-enamide	CC1=C(C2=CC=CC=C2N1)CCNCC3=CC=C(C=C3)C=CC(=O)NO		HDAC9
2,2,5,7,8-pentamethyl-3,4-dihydrochromen-6-ol	CC1=C(C2=C(CCC(O2)(C)C)C(=C1O)C)C		AR
5-[[4-[(6-hydroxy-2,5,7,8-tetramethyl-3,4-dihydrochromen-2-yl)methoxy]phenyl]methyl]-1,3-thiazolidine-2,4-dione	CC1=C(C2=C(CCC(O2)(C)COC3=CC=C(C=C3)CC4C(=O)NC(=O)S4)C(=C1O)C)C		PPARG
3-[(1R,3R)-1-[2,6-difluoro-4-[[1-(3-fluoropropyl)azetidin-3-yl]amino]phenyl]-3-methyl-1,3,4,9-tetrahydropyrido[3,4-b]indol-2-yl]-2,2-difluoropropan-1-ol	CC1CC2=C(C(N1CC(CO)(F)F)C3=C(C=C(C=C3F)NC4CN(C4)CCCF)F)NC5=CC=CC=C25		ESR1
(3S,4S)-8-[6-amino-5-(2-amino-3-chloropyridin-4-yl)sulfanylpyrazin-2-yl]-3-methyl-2-oxa-8-azaspiro[4.5]decan-4-amine	CC1C(C2(CCN(CC2)C3=CN=C(C(=N3)N)SC4=C(C(=NC=C4)N)Cl)CO1)N		PTPN11
4-[6,6-dimethyl-4-oxo-3-(trifluoromethyl)-5,7-dihydroindazol-1-yl]-2-[(4-hydroxycyclohexyl)amino]benzamide	CC1(CC2=C(C(=O)C1)C(=NN2C3=CC(=C(C=C3)C(=O)N)NC4CCC(CC4)O)C(F)(F)F)C		HSP90AA1
[4-[2-carbamoyl-5-[6,6-dimethyl-4-oxo-3-(trifluoromethyl)-5,7-dihydroindazol-1-yl]anilino]cyclohexyl] 2-aminoacetate	CC1(CC2=C(C(=O)C1)C(=NN2C3=CC(=C(C=C3)C(=O)N)NC4CCC(CC4)OC(=O)CN)C(F)(F)F)C		HSP90AA1
[4-[2-carbamoyl-5-[6,6-dimethyl-4-oxo-3-(trifluoromethyl)-5,7-dihydroindazol-1-yl]anilino]cyclohexyl] 2-aminoacetate	CC1(CC2=C(C(=O)C1)C(=NN2C3=CC(=C(C=C3)C(=O)N)NC4CCC(CC4)OC(=O)CN)C(F)(F)F)C		HSP90AB1
1-[[4-[(4-fluoro-2-methyl-1H-indol-5-yl)oxy]-6-methoxyquinolin-7-yl]oxymethyl]cyclopropan-1-amine	CC1=CC2=C(N1)C=CC(=C2F)OC3=C4C=C(C(=CC4=NC=C3)OCC5(CC5)N)OC		FLT4
1-[[4-[(4-fluoro-2-methyl-1H-indol-5-yl)oxy]-6-methoxyquinolin-7-yl]oxymethyl]cyclopropan-1-amine	CC1=CC2=C(N1)C=CC(=C2F)OC3=C4C=C(C(=CC4=NC=C3)OCC5(CC5)N)OC		KDR
1-[[4-[(4-fluoro-2-methyl-1H-indol-5-yl)oxy]-6-methoxyquinolin-7-yl]oxymethyl]cyclopropan-1-amine	CC1=CC2=C(N1)C=CC(=C2F)OC3=C4C=C(C(=CC4=NC=C3)OCC5(CC5)N)OC		KIT
1-[[4-[(4-fluoro-2-methyl-1H-indol-5-yl)oxy]-6-methoxyquinolin-7-yl]oxymethyl]cyclopropan-1-amine	CC1=CC2=C(N1)C=CC(=C2F)OC3=C4C=C(C(=CC4=NC=C3)OCC5(CC5)N)OC		PDGFRB
4-[(4-fluoro-2-methyl-1H-indol-5-yl)oxy]-6-methoxy-7-(3-pyrrolidin-1-ylpropoxy)quinazoline	CC1=CC2=C(N1)C=CC(=C2F)OC3=NC=NC4=CC(=C(C=C43)OC)OCCCN5CCCC5		FGFR1
4-[(4-fluoro-2-methyl-1H-indol-5-yl)oxy]-6-methoxy-7-(3-pyrrolidin-1-ylpropoxy)quinazoline	CC1=CC2=C(N1)C=CC(=C2F)OC3=NC=NC4=CC(=C(C=C43)OC)OCCCN5CCCC5		FLT1
4-[(4-fluoro-2-methyl-1H-indol-5-yl)oxy]-6-methoxy-7-(3-pyrrolidin-1-ylpropoxy)quinazoline	CC1=CC2=C(N1)C=CC(=C2F)OC3=NC=NC4=CC(=C(C=C43)OC)OCCCN5CCCC5		FLT3
4-[(4-fluoro-2-methyl-1H-indol-5-yl)oxy]-6-methoxy-7-(3-pyrrolidin-1-ylpropoxy)quinazoline	CC1=CC2=C(N1)C=CC(=C2F)OC3=NC=NC4=CC(=C(C=C43)OC)OCCCN5CCCC5		FLT4
4-[(4-fluoro-2-methyl-1H-indol-5-yl)oxy]-6-methoxy-7-(3-pyrrolidin-1-ylpropoxy)quinazoline	CC1=CC2=C(N1)C=CC(=C2F)OC3=NC=NC4=CC(=C(C=C43)OC)OCCCN5CCCC5		KDR
4-[(4-fluoro-2-methyl-1H-indol-5-yl)oxy]-6-methoxy-7-(3-pyrrolidin-1-ylpropoxy)quinazoline	CC1=CC2=C(N1)C=CC(=C2F)OC3=NC=NC4=CC(=C(C=C43)OC)OCCCN5CCCC5		KIT
4-[(4-fluoro-2-methyl-1H-indol-5-yl)oxy]-6-methoxy-7-(3-pyrrolidin-1-ylpropoxy)quinazoline	CC1=CC2=C(N1)C=CC(=C2F)OC3=NC=NC4=CC(=C(C=C43)OC)OCCCN5CCCC5		PDGFRA
4-[(4-fluoro-2-methyl-1H-indol-5-yl)oxy]-6-methoxy-7-(3-pyrrolidin-1-ylpropoxy)quinazoline	CC1=CC2=C(N1)C=CC(=C2F)OC3=NC=NC4=CC(=C(C=C43)OC)OCCCN5CCCC5		PDGFRB
(2R)-1-[4-[(4-fluoro-2-methyl-1H-indol-5-yl)oxy]-5-methylpyrrolo[2,1-f][1,2,4]triazin-6-yl]oxypropan-2-ol	CC1=CC2=C(N1)C=CC(=C2F)OC3=NC=NN4C3=C(C(=C4)OCC(C)O)C		FGFR1
(2R)-1-[4-[(4-fluoro-2-methyl-1H-indol-5-yl)oxy]-5-methylpyrrolo[2,1-f][1,2,4]triazin-6-yl]oxypropan-2-ol	CC1=CC2=C(N1)C=CC(=C2F)OC3=NC=NN4C3=C(C(=C4)OCC(C)O)C		FGFR2
(2R)-1-[4-[(4-fluoro-2-methyl-1H-indol-5-yl)oxy]-5-methylpyrrolo[2,1-f][1,2,4]triazin-6-yl]oxypropan-2-ol	CC1=CC2=C(N1)C=CC(=C2F)OC3=NC=NN4C3=C(C(=C4)OCC(C)O)C		FGFR3
(2R)-1-[4-[(4-fluoro-2-methyl-1H-indol-5-yl)oxy]-5-methylpyrrolo[2,1-f][1,2,4]triazin-6-yl]oxypropan-2-ol	CC1=CC2=C(N1)C=CC(=C2F)OC3=NC=NN4C3=C(C(=C4)OCC(C)O)C		FGFR4
(2R)-1-[4-[(4-fluoro-2-methyl-1H-indol-5-yl)oxy]-5-methylpyrrolo[2,1-f][1,2,4]triazin-6-yl]oxypropan-2-ol	CC1=CC2=C(N1)C=CC(=C2F)OC3=NC=NN4C3=C(C(=C4)OCC(C)O)C		FLT1
(2R)-1-[4-[(4-fluoro-2-methyl-1H-indol-5-yl)oxy]-5-methylpyrrolo[2,1-f][1,2,4]triazin-6-yl]oxypropan-2-ol	CC1=CC2=C(N1)C=CC(=C2F)OC3=NC=NN4C3=C(C(=C4)OCC(C)O)C		FLT4
(2R)-1-[4-[(4-fluoro-2-methyl-1H-indol-5-yl)oxy]-5-methylpyrrolo[2,1-f][1,2,4]triazin-6-yl]oxypropan-2-ol	CC1=CC2=C(N1)C=CC(=C2F)OC3=NC=NN4C3=C(C(=C4)OCC(C)O)C		KDR
(2R)-1-[4-[(4-fluoro-2-methyl-1H-indol-5-yl)oxy]-5-methylpyrrolo[2,1-f][1,2,4]triazin-6-yl]oxypropan-2-ol	CC1=CC2=C(N1)C=CC(=C2F)OC3=NC=NN4C3=C(C(=C4)OCC(C)O)C		PDGFRB
[(2R)-1-[4-[(4-fluoro-2-methyl-1H-indol-5-yl)oxy]-5-methylpyrrolo[2,1-f][1,2,4]triazin-6-yl]oxypropan-2-yl] (2S)-2-aminopropanoate	CC1=CC2=C(N1)C=CC(=C2F)OC3=NC=NN4C3=C(C(=C4)OCC(C)OC(=O)C(C)N)C		FGFR1
[(2R)-1-[4-[(4-fluoro-2-methyl-1H-indol-5-yl)oxy]-5-methylpyrrolo[2,1-f][1,2,4]triazin-6-yl]oxypropan-2-yl] (2S)-2-aminopropanoate	CC1=CC2=C(N1)C=CC(=C2F)OC3=NC=NN4C3=C(C(=C4)OCC(C)OC(=O)C(C)N)C		FGFR2
[(2R)-1-[4-[(4-fluoro-2-methyl-1H-indol-5-yl)oxy]-5-methylpyrrolo[2,1-f][1,2,4]triazin-6-yl]oxypropan-2-yl] (2S)-2-aminopropanoate	CC1=CC2=C(N1)C=CC(=C2F)OC3=NC=NN4C3=C(C(=C4)OCC(C)OC(=O)C(C)N)C		FGFR3
[(2R)-1-[4-[(4-fluoro-2-methyl-1H-indol-5-yl)oxy]-5-methylpyrrolo[2,1-f][1,2,4]triazin-6-yl]oxypropan-2-yl] (2S)-2-aminopropanoate	CC1=CC2=C(N1)C=CC(=C2F)OC3=NC=NN4C3=C(C(=C4)OCC(C)OC(=O)C(C)N)C		FGFR4
[(2R)-1-[4-[(4-fluoro-2-methyl-1H-indol-5-yl)oxy]-5-methylpyrrolo[2,1-f][1,2,4]triazin-6-yl]oxypropan-2-yl] (2S)-2-aminopropanoate	CC1=CC2=C(N1)C=CC(=C2F)OC3=NC=NN4C3=C(C(=C4)OCC(C)OC(=O)C(C)N)C		FLT1
[(2R)-1-[4-[(4-fluoro-2-methyl-1H-indol-5-yl)oxy]-5-methylpyrrolo[2,1-f][1,2,4]triazin-6-yl]oxypropan-2-yl] (2S)-2-aminopropanoate	CC1=CC2=C(N1)C=CC(=C2F)OC3=NC=NN4C3=C(C(=C4)OCC(C)OC(=O)C(C)N)C		FLT4
[(2R)-1-[4-[(4-fluoro-2-methyl-1H-indol-5-yl)oxy]-5-methylpyrrolo[2,1-f][1,2,4]triazin-6-yl]oxypropan-2-yl] (2S)-2-aminopropanoate	CC1=CC2=C(N1)C=CC(=C2F)OC3=NC=NN4C3=C(C(=C4)OCC(C)OC(=O)C(C)N)C		KDR
N-[2-(dimethylamino)ethyl]-1-[3-[[4-[(2-methyl-1H-indol-5-yl)oxy]pyrimidin-2-yl]amino]phenyl]methanesulfonamide	CC1=CC2=C(N1)C=CC(=C2)OC3=NC(=NC=C3)NC4=CC=CC(=C4)CS(=O)(=O)NCCN(C)C		FGFR1
N-[2-(dimethylamino)ethyl]-1-[3-[[4-[(2-methyl-1H-indol-5-yl)oxy]pyrimidin-2-yl]amino]phenyl]methanesulfonamide	CC1=CC2=C(N1)C=CC(=C2)OC3=NC(=NC=C3)NC4=CC=CC(=C4)CS(=O)(=O)NCCN(C)C		FLT1
N-[2-(dimethylamino)ethyl]-1-[3-[[4-[(2-methyl-1H-indol-5-yl)oxy]pyrimidin-2-yl]amino]phenyl]methanesulfonamide	CC1=CC2=C(N1)C=CC(=C2)OC3=NC(=NC=C3)NC4=CC=CC(=C4)CS(=O)(=O)NCCN(C)C		FLT4
N-[2-(dimethylamino)ethyl]-1-[3-[[4-[(2-methyl-1H-indol-5-yl)oxy]pyrimidin-2-yl]amino]phenyl]methanesulfonamide	CC1=CC2=C(N1)C=CC(=C2)OC3=NC(=NC=C3)NC4=CC=CC(=C4)CS(=O)(=O)NCCN(C)C		KDR
2-[3-(4-chlorobenzoyl)-6-methoxy-2-methylindol-1-yl]acetic acid	CC1=C(C2=C(N1CC(=O)O)C=C(C=C2)OC)C(=O)C3=CC=C(C=C3)Cl		PTGS1
2-[3-(4-chlorobenzoyl)-6-methoxy-2-methylindol-1-yl]acetic acid	CC1=C(C2=C(N1CC(=O)O)C=C(C=C2)OC)C(=O)C3=CC=C(C=C3)Cl		PTGS2
2-[1-(4-chlorobenzoyl)-5-methoxy-2-methylindol-3-yl]acetic acid	CC1=C(C2=C(N1C(=O)C3=CC=C(C=C3)Cl)C=CC(=C2)OC)CC(=O)O		PTGS1
2-[1-(4-chlorobenzoyl)-5-methoxy-2-methylindol-3-yl]acetic acid	CC1=C(C2=C(N1C(=O)C3=CC=C(C=C3)Cl)C=CC(=C2)OC)CC(=O)O		PTGS2
2-[2-[1-(4-chlorobenzoyl)-5-methoxy-2-methylindol-3-yl]acetyl]oxyacetic acid	CC1=C(C2=C(N1C(=O)C3=CC=C(C=C3)Cl)C=CC(=C2)OC)CC(=O)OCC(=O)O		PTGS1
2-[2-[1-(4-chlorobenzoyl)-5-methoxy-2-methylindol-3-yl]acetyl]oxyacetic acid	CC1=C(C2=C(N1C(=O)C3=CC=C(C=C3)Cl)C=CC(=C2)OC)CC(=O)OCC(=O)O		PTGS2
6-fluoro-N-[(5-fluoro-2-methoxypyridin-3-yl)methyl]-5-[(5-methyl-1H-pyrrolo[2,3-b]pyridin-3-yl)methyl]pyridin-2-amine	CC1=CC2=C(NC=C2CC3=C(N=C(C=C3)NCC4=C(N=CC(=C4)F)OC)F)N=C1		CSF1R
N,1,4,4-tetramethyl-8-[4-(4-methylpiperazin-1-yl)anilino]-5H-pyrazolo[4,3-h]quinazoline-3-carboxamide	CC1(CC2=CN=C(N=C2C3=C1C(=NN3C)C(=O)NC)NC4=CC=C(C=C4)N5CCN(CC5)C)C		CDK4
N,1,4,4-tetramethyl-8-[4-(4-methylpiperazin-1-yl)anilino]-5H-pyrazolo[4,3-h]quinazoline-3-carboxamide	CC1(CC2=CN=C(N=C2C3=C1C(=NN3C)C(=O)NC)NC4=CC=C(C=C4)N5CCN(CC5)C)C		NTRK1
N,2-dimethyl-6-[7-(2-morpholin-4-ylethoxy)quinolin-4-yl]oxy-1-benzofuran-3-carboxamide	CC1=C(C2=C(O1)C=C(C=C2)OC3=C4C=CC(=CC4=NC=C3)OCCN5CCOCC5)C(=O)NC		KDR
6-(6,7-dimethoxyquinazolin-4-yl)oxy-N,2-dimethyl-1-benzofuran-3-carboxamide	CC1=C(C2=C(O1)C=C(C=C2)OC3=NC=NC4=CC(=C(C=C43)OC)OC)C(=O)NC		FLT1
6-(6,7-dimethoxyquinazolin-4-yl)oxy-N,2-dimethyl-1-benzofuran-3-carboxamide	CC1=C(C2=C(O1)C=C(C=C2)OC3=NC=NC4=CC(=C(C=C43)OC)OC)C(=O)NC		FLT4
6-(6,7-dimethoxyquinazolin-4-yl)oxy-N,2-dimethyl-1-benzofuran-3-carboxamide	CC1=C(C2=C(O1)C=C(C=C2)OC3=NC=NC4=CC(=C(C=C43)OC)OC)C(=O)NC		KDR
2-methyl-4-(4-methylpiperazin-1-yl)-10H-thieno[2,3-b][1,5]benzodiazepine	CC1=CC2=C(S1)NC3=CC=CC=C3N=C2N4CCN(CC4)C		DRD2
3-amino-1-methyl-3-[4-(5-phenyl-8-oxa-3,6,12-triazatricyclo[7.4.0.02,6]trideca-1(9),2,4,10,12-pentaen-4-yl)phenyl]cyclobutan-1-ol	CC1(CC(C1)(C2=CC=C(C=C2)C3=C(N4COC5=C(C4=N3)C=NC=C5)C6=CC=CC=C6)N)O		AKT1
3-amino-1-methyl-3-[4-(5-phenyl-8-oxa-3,6,12-triazatricyclo[7.4.0.02,6]trideca-1(9),2,4,10,12-pentaen-4-yl)phenyl]cyclobutan-1-ol	CC1(CC(C1)(C2=CC=C(C=C2)C3=C(N4COC5=C(C4=N3)C=NC=C5)C6=CC=CC=C6)N)O		AKT2
3-amino-1-methyl-3-[4-(5-phenyl-8-oxa-3,6,12-triazatricyclo[7.4.0.02,6]trideca-1(9),2,4,10,12-pentaen-4-yl)phenyl]cyclobutan-1-ol	CC1(CC(C1)(C2=CC=C(C=C2)C3=C(N4COC5=C(C4=N3)C=NC=C5)C6=CC=CC=C6)N)O		AKT3
3-[8-amino-1-(2-phenylquinolin-7-yl)imidazo[1,5-a]pyrazin-3-yl]-1-methylcyclobutan-1-ol	CC1(CC(C1)C2=NC(=C3N2C=CN=C3N)C4=CC5=C(C=C4)C=CC(=N5)C6=CC=CC=C6)O		IGF1R
3-[8-amino-1-(2-phenylquinolin-7-yl)imidazo[1,5-a]pyrazin-3-yl]-1-methylcyclobutan-1-ol	CC1(CC(C1)C2=NC(=C3N2C=CN=C3N)C4=CC5=C(C=C4)C=CC(=N5)C6=CC=CC=C6)O		INSR
(2S)-2-(4-chlorophenyl)-1-[4-[(5R,7R)-7-hydroxy-5-methyl-6,7-dihydro-5H-cyclopenta[d]pyrimidin-4-yl]piperazin-1-yl]-3-(propan-2-ylamino)propan-1-one	CC1CC(C2=C1C(=NC=N2)N3CCN(CC3)C(=O)C(CNC(C)C)C4=CC=C(C=C4)Cl)O		AKT1
(2S)-2-(4-chlorophenyl)-1-[4-[(5R,7R)-7-hydroxy-5-methyl-6,7-dihydro-5H-cyclopenta[d]pyrimidin-4-yl]piperazin-1-yl]-3-(propan-2-ylamino)propan-1-one	CC1CC(C2=C1C(=NC=N2)N3CCN(CC3)C(=O)C(CNC(C)C)C4=CC=C(C=C4)Cl)O		AKT2
(2S)-2-(4-chlorophenyl)-1-[4-[(5R,7R)-7-hydroxy-5-methyl-6,7-dihydro-5H-cyclopenta[d]pyrimidin-4-yl]piperazin-1-yl]-3-(propan-2-ylamino)propan-1-one	CC1CC(C2=C1C(=NC=N2)N3CCN(CC3)C(=O)C(CNC(C)C)C4=CC=C(C=C4)Cl)O		AKT3
1-[2-[(3R,5R,8R,9R,10S,13S,14S,17S)-3-hydroxy-3,13-dimethyl-2,4,5,6,7,8,9,10,11,12,14,15,16,17-tetradecahydro-1H-cyclopenta[a]phenanthren-17-yl]-2-oxoethyl]pyrazole-4-carbonitrile	CC1(CCC2C(C1)CCC3C2CCC4(C3CCC4C(=O)CN5C=C(C=N5)C#N)C)O		GABRA2
1-[2-[(3R,5R,8R,9R,10S,13S,14S,17S)-3-hydroxy-3,13-dimethyl-2,4,5,6,7,8,9,10,11,12,14,15,16,17-tetradecahydro-1H-cyclopenta[a]phenanthren-17-yl]-2-oxoethyl]pyrazole-4-carbonitrile	CC1(CCC2C(C1)CCC3C2CCC4(C3CCC4C(=O)CN5C=C(C=N5)C#N)C)O		GABRA3
1-[2-[(3R,5R,8R,9R,10S,13S,14S,17S)-3-hydroxy-3,13-dimethyl-2,4,5,6,7,8,9,10,11,12,14,15,16,17-tetradecahydro-1H-cyclopenta[a]phenanthren-17-yl]-2-oxoethyl]pyrazole-4-carbonitrile	CC1(CCC2C(C1)CCC3C2CCC4(C3CCC4C(=O)CN5C=C(C=N5)C#N)C)O		GABRB3
1-[2-[(3R,5R,8R,9R,10S,13S,14S,17S)-3-hydroxy-3,13-dimethyl-2,4,5,6,7,8,9,10,11,12,14,15,16,17-tetradecahydro-1H-cyclopenta[a]phenanthren-17-yl]-2-oxoethyl]pyrazole-4-carbonitrile	CC1(CCC2C(C1)CCC3C2CCC4(C3CCC4C(=O)CN5C=C(C=N5)C#N)C)O		GABRE
1-[2-[(3R,5R,8R,9R,10S,13S,14S,17S)-3-hydroxy-3,13-dimethyl-2,4,5,6,7,8,9,10,11,12,14,15,16,17-tetradecahydro-1H-cyclopenta[a]phenanthren-17-yl]-2-oxoethyl]pyrazole-4-carbonitrile	CC1(CCC2C(C1)CCC3C2CCC4(C3CCC4C(=O)CN5C=C(C=N5)C#N)C)O		GABRP
methyl (4aS,6aR,6bS,8aR,12aS,14aR,14bS)-11-cyano-2,2,6a,6b,9,9,12a-heptamethyl-10,14-dioxo-1,3,4,5,6,7,8,8a,14a,14b-decahydropicene-4a-carboxylate	CC1(CCC2(CCC3(C(C2C1)C(=O)C=C4C3(CCC5C4(C=C(C(=O)C5(C)C)C#N)C)C)C)C(=O)OC)C		IKBKB
methyl (4aS,6aR,6bS,8aR,12aS,14aR,14bS)-11-cyano-2,2,6a,6b,9,9,12a-heptamethyl-10,14-dioxo-1,3,4,5,6,7,8,8a,14a,14b-decahydropicene-4a-carboxylate	CC1(CCC2(CCC3(C(C2C1)C(=O)C=C4C3(CCC5C4(C=C(C(=O)C5(C)C)C#N)C)C)C)C(=O)OC)C		KEAP1
methyl (4aS,6aR,6bS,8aR,12aS,14aR,14bS)-11-cyano-2,2,6a,6b,9,9,12a-heptamethyl-10,14-dioxo-1,3,4,5,6,7,8,8a,14a,14b-decahydropicene-4a-carboxylate	CC1(CCC2(CCC3(C(C2C1)C(=O)C=C4C3(CCC5C4(C=C(C(=O)C5(C)C)C#N)C)C)C)C(=O)OC)C		NFE2L2
methyl (4aS,6aR,6bS,8aR,12aS,14aR,14bS)-11-cyano-2,2,6a,6b,9,9,12a-heptamethyl-10,14-dioxo-1,3,4,5,6,7,8,8a,14a,14b-decahydropicene-4a-carboxylate	CC1(CCC2(CCC3(C(C2C1)C(=O)C=C4C3(CCC5C4(C=C(C(=O)C5(C)C)C#N)C)C)C)C(=O)OC)C		PPARG
N-[(4aS,6aR,6bS,8aR,12aS,14aR,14bS)-11-cyano-2,2,6a,6b,9,9,12a-heptamethyl-10,14-dioxo-1,3,4,5,6,7,8,8a,14a,14b-decahydropicen-4a-yl]-2,2-difluoropropanamide	CC1(CCC2(CCC3(C(C2C1)C(=O)C=C4C3(CCC5C4(C=C(C(=O)C5(C)C)C#N)C)C)C)NC(=O)C(C)(F)F)C		NFE2L2
(1R,9S,12S,15R,16E,18R,19R,21R,23S,24E,26E,28E,30S,32S,35R)-1,18-dihydroxy-12-[(2R)-1-[(1S,3R,4R)-4-(2-hydroxyethoxy)-3-methoxycyclohexyl]propan-2-yl]-19,30-dimethoxy-15,17,21,23,29,35-hexamethyl-11,36-dioxa-4-azatricyclo[30.3.1.04,9]hexatriaconta-16,24,26,28-tetraene-2,3,10,14,20-pentone	CC1CCC2CC(C(=CC=CC=CC(CC(C(=O)C(C(C(=CC(C(=O)CC(OC(=O)C3CCCCN3C(=O)C(=O)C1(O2)O)C(C)CC4CCC(C(C4)OC)OCCO)C)C)O)OC)C)C)C)OC		AKT1
(1R,9S,12S,15R,16E,18R,19R,21R,23S,24E,26E,28E,30S,32S,35R)-1,18-dihydroxy-12-[(2R)-1-[(1S,3R,4R)-4-(2-hydroxyethoxy)-3-methoxycyclohexyl]propan-2-yl]-19,30-dimethoxy-15,17,21,23,29,35-hexamethyl-11,36-dioxa-4-azatricyclo[30.3.1.04,9]hexatriaconta-16,24,26,28-tetraene-2,3,10,14,20-pentone	CC1CCC2CC(C(=CC=CC=CC(CC(C(=O)C(C(C(=CC(C(=O)CC(OC(=O)C3CCCCN3C(=O)C(=O)C1(O2)O)C(C)CC4CCC(C(C4)OC)OCCO)C)C)O)OC)C)C)C)OC		AKT2
(1R,9S,12S,15R,16E,18R,19R,21R,23S,24E,26E,28E,30S,32S,35R)-1,18-dihydroxy-12-[(2R)-1-[(1S,3R,4R)-4-(2-hydroxyethoxy)-3-methoxycyclohexyl]propan-2-yl]-19,30-dimethoxy-15,17,21,23,29,35-hexamethyl-11,36-dioxa-4-azatricyclo[30.3.1.04,9]hexatriaconta-16,24,26,28-tetraene-2,3,10,14,20-pentone	CC1CCC2CC(C(=CC=CC=CC(CC(C(=O)C(C(C(=CC(C(=O)CC(OC(=O)C3CCCCN3C(=O)C(=O)C1(O2)O)C(C)CC4CCC(C(C4)OC)OCCO)C)C)O)OC)C)C)C)OC		AKT3
(1R,9S,12S,15R,16E,18R,19R,21R,23S,24E,26E,28E,30S,32S,35R)-1,18-dihydroxy-12-[(2R)-1-[(1S,3R,4R)-4-(2-hydroxyethoxy)-3-methoxycyclohexyl]propan-2-yl]-19,30-dimethoxy-15,17,21,23,29,35-hexamethyl-11,36-dioxa-4-azatricyclo[30.3.1.04,9]hexatriaconta-16,24,26,28-tetraene-2,3,10,14,20-pentone	CC1CCC2CC(C(=CC=CC=CC(CC(C(=O)C(C(C(=CC(C(=O)CC(OC(=O)C3CCCCN3C(=O)C(=O)C1(O2)O)C(C)CC4CCC(C(C4)OC)OCCO)C)C)O)OC)C)C)C)OC		MTOR
(1R,9S,12S,15R,16E,18R,19R,21R,23S,24E,26E,28E,30S,32S,35R)-1,18-dihydroxy-12-[(2R)-1-[(1S,3R,4R)-4-hydroxy-3-methoxycyclohexyl]propan-2-yl]-19,30-dimethoxy-15,17,21,23,29,35-hexamethyl-11,36-dioxa-4-azatricyclo[30.3.1.04,9]hexatriaconta-16,24,26,28-tetraene-2,3,10,14,20-pentone	CC1CCC2CC(C(=CC=CC=CC(CC(C(=O)C(C(C(=CC(C(=O)CC(OC(=O)C3CCCCN3C(=O)C(=O)C1(O2)O)C(C)CC4CCC(C(C4)OC)O)C)C)O)OC)C)C)C)OC		MTOR
(6R,15R)-9-fluoro-15-methyl-2,11,16,20,21,24-hexazapentacyclo[16.5.2.02,6.07,12.021,25]pentacosa-1(24),7(12),8,10,18(25),19,22-heptaen-17-one	CC1CCC2=C(C=C(C=N2)F)C3CCCN3C4=NC5=C(C=NN5C=C4)C(=O)N1		NTRK1
(6R,15R)-9-fluoro-15-methyl-2,11,16,20,21,24-hexazapentacyclo[16.5.2.02,6.07,12.021,25]pentacosa-1(24),7(12),8,10,18(25),19,22-heptaen-17-one	CC1CCC2=C(C=C(C=N2)F)C3CCCN3C4=NC5=C(C=NN5C=C4)C(=O)N1		NTRK2
(6R,15R)-9-fluoro-15-methyl-2,11,16,20,21,24-hexazapentacyclo[16.5.2.02,6.07,12.021,25]pentacosa-1(24),7(12),8,10,18(25),19,22-heptaen-17-one	CC1CCC2=C(C=C(C=N2)F)C3CCCN3C4=NC5=C(C=NN5C=C4)C(=O)N1		NTRK3
2-[(3S,4S)-1-(aminomethyl)-3,4-dimethylcyclopentyl]acetic acid	CC1CC(CC1C)(CC(=O)O)CN		CACNA1A
2-[(3S,4S)-1-(aminomethyl)-3,4-dimethylcyclopentyl]acetic acid	CC1CC(CC1C)(CC(=O)O)CN		CACNA1C
2-[(3S,4S)-1-(aminomethyl)-3,4-dimethylcyclopentyl]acetic acid	CC1CC(CC1C)(CC(=O)O)CN		CACNA1D
2-[(3S,4S)-1-(aminomethyl)-3,4-dimethylcyclopentyl]acetic acid	CC1CC(CC1C)(CC(=O)O)CN		CACNA1H
2-[(3S,4S)-1-(aminomethyl)-3,4-dimethylcyclopentyl]acetic acid	CC1CC(CC1C)(CC(=O)O)CN		CACNA2D1
2-[(3S,4S)-1-(aminomethyl)-3,4-dimethylcyclopentyl]acetic acid	CC1CC(CC1C)(CC(=O)O)CN		CACNA2D2
2-[(3S,4S)-1-(aminomethyl)-3,4-dimethylcyclopentyl]acetic acid	CC1CC(CC1C)(CC(=O)O)CN		CACNA2D3
2-[(3S,4S)-1-(aminomethyl)-3,4-dimethylcyclopentyl]acetic acid	CC1CC(CC1C)(CC(=O)O)CN		CACNA2D4
2-[(3S,4S)-1-(aminomethyl)-3,4-dimethylcyclopentyl]acetic acid	CC1CC(CC1C)(CC(=O)O)CN		CACNB3
2-[(3S,4S)-1-(aminomethyl)-3,4-dimethylcyclopentyl]acetic acid	CC1CC(CC1C)(CC(=O)O)CN		CACNG4
2-[(3S,4S)-1-(aminomethyl)-3,4-dimethylcyclopentyl]acetic acid	CC1CC(CC1C)(CC(=O)O)CN		CACNG6
2-[(3S,4S)-1-(aminomethyl)-3,4-dimethylcyclopentyl]acetic acid	CC1CC(CC1C)(CC(=O)O)CN		CACNG7
2-amino-9-[(1S,3R,4S)-4-hydroxy-3-(hydroxymethyl)-2-methylidenecyclopentyl]-1H-purin-6-one	C=C1C(CC(C1CO)O)N2C=NC3=C2N=C(NC3=O)N		OCA2
4-[(E)-2-[5,5,8,8-tetramethyl-3-(pyrazol-1-ylmethyl)-6,7-dihydronaphthalen-2-yl]ethenyl]benzoic acid	CC1(CCC(C2=C1C=C(C(=C2)C=CC3=CC=C(C=C3)C(=O)O)CN4C=CC=N4)(C)C)C		RARG
4-[(4-chloro-3-hydroxy-5,5,8,8-tetramethyl-6,7-dihydronaphthalene-2-carbonyl)amino]-2,6-difluorobenzoic acid	CC1(CCC(C2=C1C=C(C(=C2Cl)O)C(=O)NC3=CC(=C(C(=C3)F)C(=O)O)F)(C)C)C		RARA
4-[(5,5,8,8-tetramethyl-6,7-dihydronaphthalen-2-yl)carbamoyl]benzoic acid	CC1(CCC(C2=C1C=CC(=C2)NC(=O)C3=CC=C(C=C3)C(=O)O)(C)C)C		RARA
4-[(5,5,8,8-tetramethyl-6,7-dihydronaphthalen-2-yl)carbamoyl]benzoic acid	CC1(CCC(C2=C1C=CC(=C2)NC(=O)C3=CC=C(C=C3)C(=O)O)(C)C)C		RARB
3-[[(5S,7S)-3-[5-(2-hydroxypropan-2-yl)pyrazin-2-yl]-7-methyl-2-oxo-1-oxa-3-azaspiro[4.5]decan-7-yl]methyl]benzimidazole-5-carbonitrile	CC1(CCCC2(C1)CN(C(=O)O2)C3=NC=C(N=C3)C(C)(C)O)CN4C=NC5=C4C=C(C=C5)C#N		TRPV4
4-[[(2S)-2-(3-chlorophenyl)-2-hydroxyethyl]amino]-3-(4-methyl-6-morpholin-4-yl-1H-benzimidazol-2-yl)-1H-pyridin-2-one	CC1=CC(=CC2=C1N=C(N2)C3=C(C=CNC3=O)NCC(C4=CC(=CC=C4)Cl)O)N5CCOCC5		IGF1R
[4-chloro-3-[5-methyl-3-[4-(2-pyrrolidin-1-ylethoxy)anilino]-1,2,4-benzotriazin-7-yl]phenyl] benzoate	CC1=CC(=CC2=C1N=C(N=N2)NC3=CC=C(C=C3)OCCN4CCCC4)C5=C(C=CC(=C5)OC(=O)C6=CC=CC=C6)Cl		BLK
[4-chloro-3-[5-methyl-3-[4-(2-pyrrolidin-1-ylethoxy)anilino]-1,2,4-benzotriazin-7-yl]phenyl] benzoate	CC1=CC(=CC2=C1N=C(N=N2)NC3=CC=C(C=C3)OCCN4CCCC4)C5=C(C=CC(=C5)OC(=O)C6=CC=CC=C6)Cl		EPHB4
[4-chloro-3-[5-methyl-3-[4-(2-pyrrolidin-1-ylethoxy)anilino]-1,2,4-benzotriazin-7-yl]phenyl] benzoate	CC1=CC(=CC2=C1N=C(N=N2)NC3=CC=C(C=C3)OCCN4CCCC4)C5=C(C=CC(=C5)OC(=O)C6=CC=CC=C6)Cl		FGFR1
[4-chloro-3-[5-methyl-3-[4-(2-pyrrolidin-1-ylethoxy)anilino]-1,2,4-benzotriazin-7-yl]phenyl] benzoate	CC1=CC(=CC2=C1N=C(N=N2)NC3=CC=C(C=C3)OCCN4CCCC4)C5=C(C=CC(=C5)OC(=O)C6=CC=CC=C6)Cl		FGFR2
[4-chloro-3-[5-methyl-3-[4-(2-pyrrolidin-1-ylethoxy)anilino]-1,2,4-benzotriazin-7-yl]phenyl] benzoate	CC1=CC(=CC2=C1N=C(N=N2)NC3=CC=C(C=C3)OCCN4CCCC4)C5=C(C=CC(=C5)OC(=O)C6=CC=CC=C6)Cl		FGR
[4-chloro-3-[5-methyl-3-[4-(2-pyrrolidin-1-ylethoxy)anilino]-1,2,4-benzotriazin-7-yl]phenyl] benzoate	CC1=CC(=CC2=C1N=C(N=N2)NC3=CC=C(C=C3)OCCN4CCCC4)C5=C(C=CC(=C5)OC(=O)C6=CC=CC=C6)Cl		FLT1
[4-chloro-3-[5-methyl-3-[4-(2-pyrrolidin-1-ylethoxy)anilino]-1,2,4-benzotriazin-7-yl]phenyl] benzoate	CC1=CC(=CC2=C1N=C(N=N2)NC3=CC=C(C=C3)OCCN4CCCC4)C5=C(C=CC(=C5)OC(=O)C6=CC=CC=C6)Cl		FYN
[4-chloro-3-[5-methyl-3-[4-(2-pyrrolidin-1-ylethoxy)anilino]-1,2,4-benzotriazin-7-yl]phenyl] benzoate	CC1=CC(=CC2=C1N=C(N=N2)NC3=CC=C(C=C3)OCCN4CCCC4)C5=C(C=CC(=C5)OC(=O)C6=CC=CC=C6)Cl		HCK
[4-chloro-3-[5-methyl-3-[4-(2-pyrrolidin-1-ylethoxy)anilino]-1,2,4-benzotriazin-7-yl]phenyl] benzoate	CC1=CC(=CC2=C1N=C(N=N2)NC3=CC=C(C=C3)OCCN4CCCC4)C5=C(C=CC(=C5)OC(=O)C6=CC=CC=C6)Cl		KDR
[4-chloro-3-[5-methyl-3-[4-(2-pyrrolidin-1-ylethoxy)anilino]-1,2,4-benzotriazin-7-yl]phenyl] benzoate	CC1=CC(=CC2=C1N=C(N=N2)NC3=CC=C(C=C3)OCCN4CCCC4)C5=C(C=CC(=C5)OC(=O)C6=CC=CC=C6)Cl		LCK
[4-chloro-3-[5-methyl-3-[4-(2-pyrrolidin-1-ylethoxy)anilino]-1,2,4-benzotriazin-7-yl]phenyl] benzoate	CC1=CC(=CC2=C1N=C(N=N2)NC3=CC=C(C=C3)OCCN4CCCC4)C5=C(C=CC(=C5)OC(=O)C6=CC=CC=C6)Cl		LYN
[4-chloro-3-[5-methyl-3-[4-(2-pyrrolidin-1-ylethoxy)anilino]-1,2,4-benzotriazin-7-yl]phenyl] benzoate	CC1=CC(=CC2=C1N=C(N=N2)NC3=CC=C(C=C3)OCCN4CCCC4)C5=C(C=CC(=C5)OC(=O)C6=CC=CC=C6)Cl		PDGFRB
[4-chloro-3-[5-methyl-3-[4-(2-pyrrolidin-1-ylethoxy)anilino]-1,2,4-benzotriazin-7-yl]phenyl] benzoate	CC1=CC(=CC2=C1N=C(N=N2)NC3=CC=C(C=C3)OCCN4CCCC4)C5=C(C=CC(=C5)OC(=O)C6=CC=CC=C6)Cl		SRC
[4-chloro-3-[5-methyl-3-[4-(2-pyrrolidin-1-ylethoxy)anilino]-1,2,4-benzotriazin-7-yl]phenyl] benzoate	CC1=CC(=CC2=C1N=C(N=N2)NC3=CC=C(C=C3)OCCN4CCCC4)C5=C(C=CC(=C5)OC(=O)C6=CC=CC=C6)Cl		YES1
N-[(2R)-3-(7-methyl-1H-indazol-5-yl)-1-[4-(1-methylpiperidin-4-yl)piperazin-1-yl]-1-oxopropan-2-yl]-4-(2-oxo-1H-quinolin-3-yl)piperidine-1-carboxamide	CC1=CC(=CC2=C1NN=C2)CC(C(=O)N3CCN(CC3)C4CCN(CC4)C)NC(=O)N5CCC(CC5)C6=CC7=CC=CC=C7NC6=O		CALCRL
N-[(2R)-3-(7-methyl-1H-indazol-5-yl)-1-[4-(1-methylpiperidin-4-yl)piperazin-1-yl]-1-oxopropan-2-yl]-4-(2-oxo-1H-quinolin-3-yl)piperidine-1-carboxamide	CC1=CC(=CC2=C1NN=C2)CC(C(=O)N3CCN(CC3)C4CCN(CC4)C)NC(=O)N5CCC(CC5)C6=CC7=CC=CC=C7NC6=O		RAMP1
(3R,4S)-3,4-bis(4-hydroxyphenyl)-8-methyl-3,4-dihydro-2H-chromen-7-ol	CC1=C(C=CC2=C1OCC(C2C3=CC=C(C=C3)O)C4=CC=C(C=C4)O)O		NDUFA4L2
6-[3-(dimethylcarbamoyl)phenyl]sulfonyl-4-(3-methoxyanilino)-8-methylquinoline-3-carboxamide	CC1=CC(=CC2=C(C(=CN=C12)C(=O)N)NC3=CC(=CC=C3)OC)S(=O)(=O)C4=CC=CC(=C4)C(=O)N(C)C		PDE4B
6-[3-(dimethylcarbamoyl)phenyl]sulfonyl-4-(3-methoxyanilino)-8-methylquinoline-3-carboxamide	CC1=CC(=CC2=C(C(=CN=C12)C(=O)N)NC3=CC(=CC=C3)OC)S(=O)(=O)C4=CC=CC(=C4)C(=O)N(C)C		PDE4C
6-[3-(dimethylcarbamoyl)phenyl]sulfonyl-4-(3-methoxyanilino)-8-methylquinoline-3-carboxamide	CC1=CC(=CC2=C(C(=CN=C12)C(=O)N)NC3=CC(=CC=C3)OC)S(=O)(=O)C4=CC=CC(=C4)C(=O)N(C)C		PDE4D
(1S,3S,7S,10R,11S,12S,16R)-7,11-dihydroxy-8,8,10,12,16-pentamethyl-3-[(E)-1-(2-methyl-1,3-thiazol-4-yl)prop-1-en-2-yl]-17-oxa-4-azabicyclo[14.1.0]heptadecane-5,9-dione	CC1CCCC2(C(O2)CC(NC(=O)CC(C(C(=O)C(C1O)C)(C)C)O)C(=CC3=CSC(=N3)C)C)C		TUBA1A
(1S,3S,7S,10R,11S,12S,16R)-7,11-dihydroxy-8,8,10,12,16-pentamethyl-3-[(E)-1-(2-methyl-1,3-thiazol-4-yl)prop-1-en-2-yl]-17-oxa-4-azabicyclo[14.1.0]heptadecane-5,9-dione	CC1CCCC2(C(O2)CC(NC(=O)CC(C(C(=O)C(C1O)C)(C)C)O)C(=CC3=CSC(=N3)C)C)C		TUBA1C
(1S,3S,7S,10R,11S,12S,16R)-7,11-dihydroxy-8,8,10,12,16-pentamethyl-3-[(E)-1-(2-methyl-1,3-thiazol-4-yl)prop-1-en-2-yl]-17-oxa-4-azabicyclo[14.1.0]heptadecane-5,9-dione	CC1CCCC2(C(O2)CC(NC(=O)CC(C(C(=O)C(C1O)C)(C)C)O)C(=CC3=CSC(=N3)C)C)C		TUBA3C
(1S,3S,7S,10R,11S,12S,16R)-7,11-dihydroxy-8,8,10,12,16-pentamethyl-3-[(E)-1-(2-methyl-1,3-thiazol-4-yl)prop-1-en-2-yl]-17-oxa-4-azabicyclo[14.1.0]heptadecane-5,9-dione	CC1CCCC2(C(O2)CC(NC(=O)CC(C(C(=O)C(C1O)C)(C)C)O)C(=CC3=CSC(=N3)C)C)C		TUBA4A
(1S,3S,7S,10R,11S,12S,16R)-7,11-dihydroxy-8,8,10,12,16-pentamethyl-3-[(E)-1-(2-methyl-1,3-thiazol-4-yl)prop-1-en-2-yl]-17-oxa-4-azabicyclo[14.1.0]heptadecane-5,9-dione	CC1CCCC2(C(O2)CC(NC(=O)CC(C(C(=O)C(C1O)C)(C)C)O)C(=CC3=CSC(=N3)C)C)C		TUBB2A
(1S,3S,7S,10R,11S,12S,16R)-7,11-dihydroxy-8,8,10,12,16-pentamethyl-3-[(E)-1-(2-methyl-1,3-thiazol-4-yl)prop-1-en-2-yl]-17-oxa-4-azabicyclo[14.1.0]heptadecane-5,9-dione	CC1CCCC2(C(O2)CC(NC(=O)CC(C(C(=O)C(C1O)C)(C)C)O)C(=CC3=CSC(=N3)C)C)C		TUBB2B
(1S,3S,7S,10R,11S,12S,16R)-7,11-dihydroxy-8,8,10,12,16-pentamethyl-3-[(E)-1-(2-methyl-1,3-thiazol-4-yl)prop-1-en-2-yl]-17-oxa-4-azabicyclo[14.1.0]heptadecane-5,9-dione	CC1CCCC2(C(O2)CC(NC(=O)CC(C(C(=O)C(C1O)C)(C)C)O)C(=CC3=CSC(=N3)C)C)C		TUBB3
(1S,3S,7S,10R,11S,12S,16R)-7,11-dihydroxy-8,8,10,12,16-pentamethyl-3-[(E)-1-(2-methyl-1,3-thiazol-4-yl)prop-1-en-2-yl]-17-oxa-4-azabicyclo[14.1.0]heptadecane-5,9-dione	CC1CCCC2(C(O2)CC(NC(=O)CC(C(C(=O)C(C1O)C)(C)C)O)C(=CC3=CSC(=N3)C)C)C		TUBB4A
(1S,3S,7S,10R,11S,12S,16R)-7,11-dihydroxy-8,8,10,12,16-pentamethyl-3-[(E)-1-(2-methyl-1,3-thiazol-4-yl)prop-1-en-2-yl]-17-oxa-4-azabicyclo[14.1.0]heptadecane-5,9-dione	CC1CCCC2(C(O2)CC(NC(=O)CC(C(C(=O)C(C1O)C)(C)C)O)C(=CC3=CSC(=N3)C)C)C		TUBB6
(1S,3S,7S,10R,11S,12S,16R)-7,11-dihydroxy-8,8,12,16-tetramethyl-3-(2-methyl-1,3-benzothiazol-5-yl)-10-prop-2-enyl-4,17-dioxabicyclo[14.1.0]heptadecane-5,9-dione	CC1CCCC2(C(O2)CC(OC(=O)CC(C(C(=O)C(C1O)CC=C)(C)C)O)C3=CC4=C(C=C3)SC(=N4)C)C		TUBA1A
(1S,3S,7S,10R,11S,12S,16R)-7,11-dihydroxy-8,8,12,16-tetramethyl-3-(2-methyl-1,3-benzothiazol-5-yl)-10-prop-2-enyl-4,17-dioxabicyclo[14.1.0]heptadecane-5,9-dione	CC1CCCC2(C(O2)CC(OC(=O)CC(C(C(=O)C(C1O)CC=C)(C)C)O)C3=CC4=C(C=C3)SC(=N4)C)C		TUBA1C
(1S,3S,7S,10R,11S,12S,16R)-7,11-dihydroxy-8,8,12,16-tetramethyl-3-(2-methyl-1,3-benzothiazol-5-yl)-10-prop-2-enyl-4,17-dioxabicyclo[14.1.0]heptadecane-5,9-dione	CC1CCCC2(C(O2)CC(OC(=O)CC(C(C(=O)C(C1O)CC=C)(C)C)O)C3=CC4=C(C=C3)SC(=N4)C)C		TUBA3C
(1S,3S,7S,10R,11S,12S,16R)-7,11-dihydroxy-8,8,12,16-tetramethyl-3-(2-methyl-1,3-benzothiazol-5-yl)-10-prop-2-enyl-4,17-dioxabicyclo[14.1.0]heptadecane-5,9-dione	CC1CCCC2(C(O2)CC(OC(=O)CC(C(C(=O)C(C1O)CC=C)(C)C)O)C3=CC4=C(C=C3)SC(=N4)C)C		TUBA4A
(1S,3S,7S,10R,11S,12S,16R)-7,11-dihydroxy-8,8,12,16-tetramethyl-3-(2-methyl-1,3-benzothiazol-5-yl)-10-prop-2-enyl-4,17-dioxabicyclo[14.1.0]heptadecane-5,9-dione	CC1CCCC2(C(O2)CC(OC(=O)CC(C(C(=O)C(C1O)CC=C)(C)C)O)C3=CC4=C(C=C3)SC(=N4)C)C		TUBB2A
(1S,3S,7S,10R,11S,12S,16R)-7,11-dihydroxy-8,8,12,16-tetramethyl-3-(2-methyl-1,3-benzothiazol-5-yl)-10-prop-2-enyl-4,17-dioxabicyclo[14.1.0]heptadecane-5,9-dione	CC1CCCC2(C(O2)CC(OC(=O)CC(C(C(=O)C(C1O)CC=C)(C)C)O)C3=CC4=C(C=C3)SC(=N4)C)C		TUBB2B
(1S,3S,7S,10R,11S,12S,16R)-7,11-dihydroxy-8,8,12,16-tetramethyl-3-(2-methyl-1,3-benzothiazol-5-yl)-10-prop-2-enyl-4,17-dioxabicyclo[14.1.0]heptadecane-5,9-dione	CC1CCCC2(C(O2)CC(OC(=O)CC(C(C(=O)C(C1O)CC=C)(C)C)O)C3=CC4=C(C=C3)SC(=N4)C)C		TUBB3
(1S,3S,7S,10R,11S,12S,16R)-7,11-dihydroxy-8,8,12,16-tetramethyl-3-(2-methyl-1,3-benzothiazol-5-yl)-10-prop-2-enyl-4,17-dioxabicyclo[14.1.0]heptadecane-5,9-dione	CC1CCCC2(C(O2)CC(OC(=O)CC(C(C(=O)C(C1O)CC=C)(C)C)O)C3=CC4=C(C=C3)SC(=N4)C)C		TUBB4A
(1S,3S,7S,10R,11S,12S,16R)-7,11-dihydroxy-8,8,12,16-tetramethyl-3-(2-methyl-1,3-benzothiazol-5-yl)-10-prop-2-enyl-4,17-dioxabicyclo[14.1.0]heptadecane-5,9-dione	CC1CCCC2(C(O2)CC(OC(=O)CC(C(C(=O)C(C1O)CC=C)(C)C)O)C3=CC4=C(C=C3)SC(=N4)C)C		TUBB6
(1S,3S,7S,10R,11S,12S,16R)-7,11-dihydroxy-8,8,10,12,16-pentamethyl-3-[(E)-1-(2-methyl-1,3-thiazol-4-yl)prop-1-en-2-yl]-4,17-dioxabicyclo[14.1.0]heptadecane-5,9-dione	CC1CCCC2(C(O2)CC(OC(=O)CC(C(C(=O)C(C1O)C)(C)C)O)C(=CC3=CSC(=N3)C)C)C		TUBA1A
(1S,3S,7S,10R,11S,12S,16R)-7,11-dihydroxy-8,8,10,12,16-pentamethyl-3-[(E)-1-(2-methyl-1,3-thiazol-4-yl)prop-1-en-2-yl]-4,17-dioxabicyclo[14.1.0]heptadecane-5,9-dione	CC1CCCC2(C(O2)CC(OC(=O)CC(C(C(=O)C(C1O)C)(C)C)O)C(=CC3=CSC(=N3)C)C)C		TUBA1C
(1S,3S,7S,10R,11S,12S,16R)-7,11-dihydroxy-8,8,10,12,16-pentamethyl-3-[(E)-1-(2-methyl-1,3-thiazol-4-yl)prop-1-en-2-yl]-4,17-dioxabicyclo[14.1.0]heptadecane-5,9-dione	CC1CCCC2(C(O2)CC(OC(=O)CC(C(C(=O)C(C1O)C)(C)C)O)C(=CC3=CSC(=N3)C)C)C		TUBA3C
(1S,3S,7S,10R,11S,12S,16R)-7,11-dihydroxy-8,8,10,12,16-pentamethyl-3-[(E)-1-(2-methyl-1,3-thiazol-4-yl)prop-1-en-2-yl]-4,17-dioxabicyclo[14.1.0]heptadecane-5,9-dione	CC1CCCC2(C(O2)CC(OC(=O)CC(C(C(=O)C(C1O)C)(C)C)O)C(=CC3=CSC(=N3)C)C)C		TUBA4A
(1S,3S,7S,10R,11S,12S,16R)-7,11-dihydroxy-8,8,10,12,16-pentamethyl-3-[(E)-1-(2-methyl-1,3-thiazol-4-yl)prop-1-en-2-yl]-4,17-dioxabicyclo[14.1.0]heptadecane-5,9-dione	CC1CCCC2(C(O2)CC(OC(=O)CC(C(C(=O)C(C1O)C)(C)C)O)C(=CC3=CSC(=N3)C)C)C		TUBB2A
(1S,3S,7S,10R,11S,12S,16R)-7,11-dihydroxy-8,8,10,12,16-pentamethyl-3-[(E)-1-(2-methyl-1,3-thiazol-4-yl)prop-1-en-2-yl]-4,17-dioxabicyclo[14.1.0]heptadecane-5,9-dione	CC1CCCC2(C(O2)CC(OC(=O)CC(C(C(=O)C(C1O)C)(C)C)O)C(=CC3=CSC(=N3)C)C)C		TUBB2B
(1S,3S,7S,10R,11S,12S,16R)-7,11-dihydroxy-8,8,10,12,16-pentamethyl-3-[(E)-1-(2-methyl-1,3-thiazol-4-yl)prop-1-en-2-yl]-4,17-dioxabicyclo[14.1.0]heptadecane-5,9-dione	CC1CCCC2(C(O2)CC(OC(=O)CC(C(C(=O)C(C1O)C)(C)C)O)C(=CC3=CSC(=N3)C)C)C		TUBB3
(1S,3S,7S,10R,11S,12S,16R)-7,11-dihydroxy-8,8,10,12,16-pentamethyl-3-[(E)-1-(2-methyl-1,3-thiazol-4-yl)prop-1-en-2-yl]-4,17-dioxabicyclo[14.1.0]heptadecane-5,9-dione	CC1CCCC2(C(O2)CC(OC(=O)CC(C(C(=O)C(C1O)C)(C)C)O)C(=CC3=CSC(=N3)C)C)C		TUBB4A
(1S,3S,7S,10R,11S,12S,16R)-7,11-dihydroxy-8,8,10,12,16-pentamethyl-3-[(E)-1-(2-methyl-1,3-thiazol-4-yl)prop-1-en-2-yl]-4,17-dioxabicyclo[14.1.0]heptadecane-5,9-dione	CC1CCCC2(C(O2)CC(OC(=O)CC(C(C(=O)C(C1O)C)(C)C)O)C(=CC3=CSC(=N3)C)C)C		TUBB6
2-[1-[(4-tert-butylphenyl)methyl]-5-(3-methylphenyl)indol-3-yl]-2-oxoacetic acid	CC1=CC(=CC=C1)C2=CC3=C(C=C2)N(C=C3C(=O)C(=O)O)CC4=CC=C(C=C4)C(C)(C)C		SERPINE1
[(2S,4Z)-2-(hydroxymethyl)-4-methoxyiminopyrrolidin-1-yl]-[4-(2-methylphenyl)phenyl]methanone	CC1=CC=CC=C1C2=CC=C(C=C2)C(=O)N3CC(=NOC)CC3CO		OXTR
5-cyano-N-[2-(4,4-dimethylcyclohexen-1-yl)-6-(2,2,6,6-tetramethyloxan-4-yl)pyridin-3-yl]-1H-imidazole-2-carboxamide	CC1(CCC(=CC1)C2=C(C=CC(=N2)C3CC(OC(C3)(C)C)(C)C)NC(=O)C4=NC=C(N4)C#N)C		CSF1R
4-[[5-[3-(2-chloro-4-methylphenyl)pyridin-4-yl]-1,3-thiazol-2-yl]amino]phenol	CC1=CC(=C(C=C1)C2=C(C=CN=C2)C3=CN=C(S3)NC4=CC=C(C=C4)O)Cl		MAPK10
5-chloro-2-N-(5-methyl-4-piperidin-4-yl-2-propan-2-yloxyphenyl)-4-N-(2-propan-2-ylsulfonylphenyl)pyrimidine-2,4-diamine	CC1=CC(=C(C=C1C2CCNCC2)OC(C)C)NC3=NC=C(C(=N3)NC4=CC=CC=C4S(=O)(=O)C(C)C)Cl		ALK
5-chloro-2-N-(5-methyl-4-piperidin-4-yl-2-propan-2-yloxyphenyl)-4-N-(2-propan-2-ylsulfonylphenyl)pyrimidine-2,4-diamine	CC1=CC(=C(C=C1C2CCNCC2)OC(C)C)NC3=NC=C(C(=N3)NC4=CC=CC=C4S(=O)(=O)C(C)C)Cl		EML4
5-chloro-2-N-(5-methyl-4-piperidin-4-yl-2-propan-2-yloxyphenyl)-4-N-(2-propan-2-ylsulfonylphenyl)pyrimidine-2,4-diamine	CC1=CC(=C(C=C1C2CCNCC2)OC(C)C)NC3=NC=C(C(=N3)NC4=CC=CC=C4S(=O)(=O)C(C)C)Cl		NPM1
3-[2-amino-6-[1-[[6-(2-hydroxypropan-2-yl)pyridin-2-yl]methyl]triazol-4-yl]pyrimidin-4-yl]-2-methylbenzonitrile	CC1=C(C=CC=C1C2=CC(=NC(=N2)N)C3=CN(N=N3)CC4=NC(=CC=C4)C(C)(C)O)C#N		ADORA2A
3-[2-amino-6-[1-[[6-(2-hydroxypropan-2-yl)pyridin-2-yl]methyl]triazol-4-yl]pyrimidin-4-yl]-2-methylbenzonitrile	CC1=C(C=CC=C1C2=CC(=NC(=N2)N)C3=CN(N=N3)CC4=NC(=CC=C4)C(C)(C)O)C#N		ADORA2B
4-[5-(4-methylphenyl)-3-(trifluoromethyl)pyrazol-1-yl]benzenesulfonamide	CC1=CC=C(C=C1)C2=CC(=NN2C3=CC=C(C=C3)S(=O)(=O)N)C(F)(F)F		PTGS2
1-(3,3-dimethylbutyl)-3-[2-fluoro-4-methyl-5-[7-methyl-2-(methylamino)pyrido[2,3-d]pyrimidin-6-yl]phenyl]urea	CC1=CC(=C(C=C1C2=C(N=C3C(=C2)C=NC(=N3)NC)C)NC(=O)NCCC(C)(C)C)F		ARAF
1-(3,3-dimethylbutyl)-3-[2-fluoro-4-methyl-5-[7-methyl-2-(methylamino)pyrido[2,3-d]pyrimidin-6-yl]phenyl]urea	CC1=CC(=C(C=C1C2=C(N=C3C(=C2)C=NC(=N3)NC)C)NC(=O)NCCC(C)(C)C)F		BRAF
1-(3,3-dimethylbutyl)-3-[2-fluoro-4-methyl-5-[7-methyl-2-(methylamino)pyrido[2,3-d]pyrimidin-6-yl]phenyl]urea	CC1=CC(=C(C=C1C2=C(N=C3C(=C2)C=NC(=N3)NC)C)NC(=O)NCCC(C)(C)C)F		RAF1
1-[4-amino-7-(3-hydroxypropyl)-5-(4-methylphenyl)pyrrolo[2,3-d]pyrimidin-6-yl]-2-fluoroethanone	CC1=CC=C(C=C1)C2=C(N(C3=NC=NC(=C23)N)CCCO)C(=O)CF		RPS6KA1
1-[4-amino-7-(3-hydroxypropyl)-5-(4-methylphenyl)pyrrolo[2,3-d]pyrimidin-6-yl]-2-fluoroethanone	CC1=CC=C(C=C1)C2=C(N(C3=NC=NC(=C23)N)CCCO)C(=O)CF		RPS6KA2
(3R)-1-[[7-cyano-2-[3-[3-[[3-[[(3R)-3-hydroxypyrrolidin-1-yl]methyl]-1,7-naphthyridin-8-yl]amino]-2-methylphenyl]-2-methylphenyl]-1,3-benzoxazol-5-yl]methyl]pyrrolidine-3-carboxylic acid	CC1=C(C=CC=C1C2=NC3=CC(=CC(=C3O2)C#N)CN4CCC(C4)C(=O)O)C5=C(C(=CC=C5)NC6=NC=CC7=CC(=CN=C76)CN8CCC(C8)O)C		CD274
(3S,5S)-5-(3-cyclopentyloxy-4-methoxyphenyl)-3-[(3-methylphenyl)methyl]piperidin-2-one	CC1=CC(=CC=C1)CC2CC(CNC2=O)C3=CC(=C(C=C3)OC)OC4CCCC4		PDE4B
(3S,5S)-5-(3-cyclopentyloxy-4-methoxyphenyl)-3-[(3-methylphenyl)methyl]piperidin-2-one	CC1=CC(=CC=C1)CC2CC(CNC2=O)C3=CC(=C(C=C3)OC)OC4CCCC4		PDE4C
(3S,5S)-5-(3-cyclopentyloxy-4-methoxyphenyl)-3-[(3-methylphenyl)methyl]piperidin-2-one	CC1=CC(=CC=C1)CC2CC(CNC2=O)C3=CC(=C(C=C3)OC)OC4CCCC4		PDE4D
2-[(4-tert-butyl-2,6-dimethylphenyl)methyl]-4,5-dihydro-1H-imidazole	CC1=CC(=CC(=C1CC2=NCCN2)C)C(C)(C)C		ADRA1B
2-[(4-tert-butyl-2,6-dimethylphenyl)methyl]-4,5-dihydro-1H-imidazole	CC1=CC(=CC(=C1CC2=NCCN2)C)C(C)(C)C		ADRA2C
3-[2-[1-(5,6-dimethylhept-3-en-2-yl)-7a-methyl-2,3,3a,5,6,7-hexahydro-1H-inden-4-ylidene]ethylidene]-4-methylcyclohexan-1-ol	CC1CCC(CC1=CC=C2CCCC3(C2CCC3C(C)C=CC(C)C(C)C)C)O		VDR
(2R)-3-(1H-indol-3-yl)-2-[[5-[2-(4-methylphenyl)ethynyl]thiophen-2-yl]sulfonylamino]propanoic acid	CC1=CC=C(C=C1)C#CC2=CC=C(S2)S(=O)(=O)NC(CC3=CNC4=CC=CC=C43)C(=O)O		MMP2
(2R)-3-(1H-indol-3-yl)-2-[[5-[2-(4-methylphenyl)ethynyl]thiophen-2-yl]sulfonylamino]propanoic acid	CC1=CC=C(C=C1)C#CC2=CC=C(S2)S(=O)(=O)NC(CC3=CNC4=CC=CC=C43)C(=O)O		MMP9
(2E,4E,6Z,8E)-3,7-dimethyl-9-(2,6,6-trimethylcyclohexen-1-yl)nona-2,4,6,8-tetraenoic acid	CC1=C(C(CCC1)(C)C)C=CC(=CC=CC(=CC(=O)O)C)C		RARA
(2E,4E,6Z,8E)-3,7-dimethyl-9-(2,6,6-trimethylcyclohexen-1-yl)nona-2,4,6,8-tetraenoic acid	CC1=C(C(CCC1)(C)C)C=CC(=CC=CC(=CC(=O)O)C)C		RARB
(2E,4E,6Z,8E)-3,7-dimethyl-9-(2,6,6-trimethylcyclohexen-1-yl)nona-2,4,6,8-tetraenoic acid	CC1=C(C(CCC1)(C)C)C=CC(=CC=CC(=CC(=O)O)C)C		RARG
(2E,4E,6Z,8E)-3,7-dimethyl-9-(2,6,6-trimethylcyclohexen-1-yl)nona-2,4,6,8-tetraenoic acid	CC1=C(C(CCC1)(C)C)C=CC(=CC=CC(=CC(=O)O)C)C		RXRA
(2E,4E,6Z,8E)-3,7-dimethyl-9-(2,6,6-trimethylcyclohexen-1-yl)nona-2,4,6,8-tetraenoic acid	CC1=C(C(CCC1)(C)C)C=CC(=CC=CC(=CC(=O)O)C)C		RXRG
(2E,4E,6E,8E)-9-(4-methoxy-2,3,6-trimethylphenyl)-3,7-dimethylnona-2,4,6,8-tetraenoic acid	CC1=CC(=C(C(=C1C=CC(=CC=CC(=CC(=O)O)C)C)C)C)OC		RARA
(2E,4E,6E,8E)-9-(4-methoxy-2,3,6-trimethylphenyl)-3,7-dimethylnona-2,4,6,8-tetraenoic acid	CC1=CC(=C(C(=C1C=CC(=CC=CC(=CC(=O)O)C)C)C)C)OC		RARB
(2E,4E,6E,8E)-9-(4-methoxy-2,3,6-trimethylphenyl)-3,7-dimethylnona-2,4,6,8-tetraenoic acid	CC1=CC(=C(C(=C1C=CC(=CC=CC(=CC(=O)O)C)C)C)C)OC		RARG
(2E,4E,6E,8E)-9-(4-methoxy-2,3,6-trimethylphenyl)-3,7-dimethylnona-2,4,6,8-tetraenoic acid	CC1=CC(=C(C(=C1C=CC(=CC=CC(=CC(=O)O)C)C)C)C)OC		RXRA
(2E,4E,6E,8E)-9-(4-methoxy-2,3,6-trimethylphenyl)-3,7-dimethylnona-2,4,6,8-tetraenoic acid	CC1=CC(=C(C(=C1C=CC(=CC=CC(=CC(=O)O)C)C)C)C)OC		RXRG
(E)-3-[6-[(E)-1-(4-methylphenyl)-3-pyrrolidin-1-ylprop-1-enyl]pyridin-2-yl]prop-2-enoic acid	CC1=CC=C(C=C1)C(=CCN2CCCC2)C3=CC=CC(=N3)C=CC(=O)O		HRH1
3-[2-[4-(trifluoromethoxy)anilino]-1-[(1R,5R)-3,3,5-trimethylcyclohexyl]benzimidazol-5-yl]propanoic acid	CC1CC(CC(C1)(C)C)N2C3=C(C=C(C=C3)CCC(=O)O)N=C2NC4=CC=C(C=C4)OC(F)(F)F		IDH1
N-cyclohexyl-2-(3-fluoro-N-[2-(2-methylimidazol-1-yl)acetyl]anilino)-2-(2-methylphenyl)acetamide	CC1=CC=CC=C1C(C(=O)NC2CCCCC2)N(C3=CC(=CC=C3)F)C(=O)CN4C=CN=C4C		IDH1
2-methyl-1-[[2-methyl-3-(trifluoromethyl)phenyl]methyl]-6-morpholin-4-ylbenzimidazole-4-carboxylic acid	CC1=C(C=CC=C1C(F)(F)F)CN2C(=NC3=C(C=C(C=C32)N4CCOCC4)C(=O)O)C		PIK3C2B
2-methyl-1-[[2-methyl-3-(trifluoromethyl)phenyl]methyl]-6-morpholin-4-ylbenzimidazole-4-carboxylic acid	CC1=C(C=CC=C1C(F)(F)F)CN2C(=NC3=C(C=C(C=C32)N4CCOCC4)C(=O)O)C		PIK3CA
2-methyl-1-[[2-methyl-3-(trifluoromethyl)phenyl]methyl]-6-morpholin-4-ylbenzimidazole-4-carboxylic acid	CC1=C(C=CC=C1C(F)(F)F)CN2C(=NC3=C(C=C(C=C32)N4CCOCC4)C(=O)O)C		PIK3CB
2-methyl-1-[[2-methyl-3-(trifluoromethyl)phenyl]methyl]-6-morpholin-4-ylbenzimidazole-4-carboxylic acid	CC1=C(C=CC=C1C(F)(F)F)CN2C(=NC3=C(C=C(C=C32)N4CCOCC4)C(=O)O)C		PIK3CD
2-methyl-1-[[2-methyl-3-(trifluoromethyl)phenyl]methyl]-6-morpholin-4-ylbenzimidazole-4-carboxylic acid	CC1=C(C=CC=C1C(F)(F)F)CN2C(=NC3=C(C=C(C=C32)N4CCOCC4)C(=O)O)C		PIK3CG
2-methyl-1-[[2-methyl-3-(trifluoromethyl)phenyl]methyl]-6-morpholin-4-ylbenzimidazole-4-carboxylic acid	CC1=C(C=CC=C1C(F)(F)F)CN2C(=NC3=C(C=C(C=C32)N4CCOCC4)C(=O)O)C		PIK3R1
2-methyl-1-[[2-methyl-3-(trifluoromethyl)phenyl]methyl]-6-morpholin-4-ylbenzimidazole-4-carboxylic acid	CC1=C(C=CC=C1C(F)(F)F)CN2C(=NC3=C(C=C(C=C32)N4CCOCC4)C(=O)O)C		PIK3R3
2-methyl-1-[[2-methyl-3-(trifluoromethyl)phenyl]methyl]-6-morpholin-4-ylbenzimidazole-4-carboxylic acid	CC1=C(C=CC=C1C(F)(F)F)CN2C(=NC3=C(C=C(C=C32)N4CCOCC4)C(=O)O)C		PTEN
2-chloro-6-methyl-N'-[4-methyl-3-(2-quinolin-3-ylethynyl)benzoyl]benzohydrazide	CC1=C(C(=CC=C1)Cl)C(=O)NNC(=O)C2=CC(=C(C=C2)C)C#CC3=CC4=CC=CC=C4N=C3		ABL1
2-chloro-6-methyl-N'-[4-methyl-3-(2-quinolin-3-ylethynyl)benzoyl]benzohydrazide	CC1=C(C(=CC=C1)Cl)C(=O)NNC(=O)C2=CC(=C(C=C2)C)C#CC3=CC4=CC=CC=C4N=C3		BCR
methyl N-[6-[2-(5-chloro-2-methylphenyl)-1-hydroxy-3-oxoisoindol-1-yl]-1H-benzimidazol-2-yl]carbamate	CC1=C(C=C(C=C1)Cl)N2C(=O)C3=CC=CC=C3C2(C4=CC5=C(C=C4)N=C(N5)NC(=O)OC)O		ARAF
methyl N-[6-[2-(5-chloro-2-methylphenyl)-1-hydroxy-3-oxoisoindol-1-yl]-1H-benzimidazol-2-yl]carbamate	CC1=C(C=C(C=C1)Cl)N2C(=O)C3=CC=CC=C3C2(C4=CC5=C(C=C4)N=C(N5)NC(=O)OC)O		BRAF
methyl N-[6-[2-(5-chloro-2-methylphenyl)-1-hydroxy-3-oxoisoindol-1-yl]-1H-benzimidazol-2-yl]carbamate	CC1=C(C=C(C=C1)Cl)N2C(=O)C3=CC=CC=C3C2(C4=CC5=C(C=C4)N=C(N5)NC(=O)OC)O		RAF1
N-(2-chloro-6-methylphenyl)-2-[[6-[4-(2-hydroxyethyl)piperazin-1-yl]-2-methylpyrimidin-4-yl]amino]-1,3-thiazole-5-carboxamide	CC1=C(C(=CC=C1)Cl)NC(=O)C2=CN=C(S2)NC3=CC(=NC(=N3)C)N4CCN(CC4)CCO		ABL1
N-(2-chloro-6-methylphenyl)-2-[[6-[4-(2-hydroxyethyl)piperazin-1-yl]-2-methylpyrimidin-4-yl]amino]-1,3-thiazole-5-carboxamide	CC1=C(C(=CC=C1)Cl)NC(=O)C2=CN=C(S2)NC3=CC(=NC(=N3)C)N4CCN(CC4)CCO		BCR
N-(2-chloro-6-methylphenyl)-2-[[6-[4-(2-hydroxyethyl)piperazin-1-yl]-2-methylpyrimidin-4-yl]amino]-1,3-thiazole-5-carboxamide	CC1=C(C(=CC=C1)Cl)NC(=O)C2=CN=C(S2)NC3=CC(=NC(=N3)C)N4CCN(CC4)CCO		BLK
N-(2-chloro-6-methylphenyl)-2-[[6-[4-(2-hydroxyethyl)piperazin-1-yl]-2-methylpyrimidin-4-yl]amino]-1,3-thiazole-5-carboxamide	CC1=C(C(=CC=C1)Cl)NC(=O)C2=CN=C(S2)NC3=CC(=NC(=N3)C)N4CCN(CC4)CCO		BRAF
N-(2-chloro-6-methylphenyl)-2-[[6-[4-(2-hydroxyethyl)piperazin-1-yl]-2-methylpyrimidin-4-yl]amino]-1,3-thiazole-5-carboxamide	CC1=C(C(=CC=C1)Cl)NC(=O)C2=CN=C(S2)NC3=CC(=NC(=N3)C)N4CCN(CC4)CCO		CSF1R
N-(2-chloro-6-methylphenyl)-2-[[6-[4-(2-hydroxyethyl)piperazin-1-yl]-2-methylpyrimidin-4-yl]amino]-1,3-thiazole-5-carboxamide	CC1=C(C(=CC=C1)Cl)NC(=O)C2=CN=C(S2)NC3=CC(=NC(=N3)C)N4CCN(CC4)CCO		DDR2
N-(2-chloro-6-methylphenyl)-2-[[6-[4-(2-hydroxyethyl)piperazin-1-yl]-2-methylpyrimidin-4-yl]amino]-1,3-thiazole-5-carboxamide	CC1=C(C(=CC=C1)Cl)NC(=O)C2=CN=C(S2)NC3=CC(=NC(=N3)C)N4CCN(CC4)CCO		EPHA2
N-(2-chloro-6-methylphenyl)-2-[[6-[4-(2-hydroxyethyl)piperazin-1-yl]-2-methylpyrimidin-4-yl]amino]-1,3-thiazole-5-carboxamide	CC1=C(C(=CC=C1)Cl)NC(=O)C2=CN=C(S2)NC3=CC(=NC(=N3)C)N4CCN(CC4)CCO		FGR
N-(2-chloro-6-methylphenyl)-2-[[6-[4-(2-hydroxyethyl)piperazin-1-yl]-2-methylpyrimidin-4-yl]amino]-1,3-thiazole-5-carboxamide	CC1=C(C(=CC=C1)Cl)NC(=O)C2=CN=C(S2)NC3=CC(=NC(=N3)C)N4CCN(CC4)CCO		FYN
N-(2-chloro-6-methylphenyl)-2-[[6-[4-(2-hydroxyethyl)piperazin-1-yl]-2-methylpyrimidin-4-yl]amino]-1,3-thiazole-5-carboxamide	CC1=C(C(=CC=C1)Cl)NC(=O)C2=CN=C(S2)NC3=CC(=NC(=N3)C)N4CCN(CC4)CCO		HCK
N-(2-chloro-6-methylphenyl)-2-[[6-[4-(2-hydroxyethyl)piperazin-1-yl]-2-methylpyrimidin-4-yl]amino]-1,3-thiazole-5-carboxamide	CC1=C(C(=CC=C1)Cl)NC(=O)C2=CN=C(S2)NC3=CC(=NC(=N3)C)N4CCN(CC4)CCO		KIT
N-(2-chloro-6-methylphenyl)-2-[[6-[4-(2-hydroxyethyl)piperazin-1-yl]-2-methylpyrimidin-4-yl]amino]-1,3-thiazole-5-carboxamide	CC1=C(C(=CC=C1)Cl)NC(=O)C2=CN=C(S2)NC3=CC(=NC(=N3)C)N4CCN(CC4)CCO		LCK
N-(2-chloro-6-methylphenyl)-2-[[6-[4-(2-hydroxyethyl)piperazin-1-yl]-2-methylpyrimidin-4-yl]amino]-1,3-thiazole-5-carboxamide	CC1=C(C(=CC=C1)Cl)NC(=O)C2=CN=C(S2)NC3=CC(=NC(=N3)C)N4CCN(CC4)CCO		LYN
N-(2-chloro-6-methylphenyl)-2-[[6-[4-(2-hydroxyethyl)piperazin-1-yl]-2-methylpyrimidin-4-yl]amino]-1,3-thiazole-5-carboxamide	CC1=C(C(=CC=C1)Cl)NC(=O)C2=CN=C(S2)NC3=CC(=NC(=N3)C)N4CCN(CC4)CCO		PDGFRB
N-(2-chloro-6-methylphenyl)-2-[[6-[4-(2-hydroxyethyl)piperazin-1-yl]-2-methylpyrimidin-4-yl]amino]-1,3-thiazole-5-carboxamide	CC1=C(C(=CC=C1)Cl)NC(=O)C2=CN=C(S2)NC3=CC(=NC(=N3)C)N4CCN(CC4)CCO		SRC
N-(2-chloro-6-methylphenyl)-2-[[6-[4-(2-hydroxyethyl)piperazin-1-yl]-2-methylpyrimidin-4-yl]amino]-1,3-thiazole-5-carboxamide	CC1=C(C(=CC=C1)Cl)NC(=O)C2=CN=C(S2)NC3=CC(=NC(=N3)C)N4CCN(CC4)CCO		YES1
3-[(4-amino-3-methylphenyl)methyl]-7-(furan-2-yl)triazolo[4,5-d]pyrimidin-5-amine	CC1=C(C=CC(=C1)CN2C3=NC(=NC(=C3N=N2)C4=CC=CO4)N)N		ADORA2A
4-[4-[[2-(4-chlorophenyl)-5,5-dimethylcyclohexen-1-yl]methyl]piperazin-1-yl]-N-[4-[[(2R)-4-morpholin-4-yl-1-phenylsulfanylbutan-2-yl]amino]-3-(trifluoromethylsulfonyl)phenyl]sulfonylbenzamide	CC1(CCC(=C(C1)CN2CCN(CC2)C3=CC=C(C=C3)C(=O)NS(=O)(=O)C4=CC(=C(C=C4)NC(CCN5CCOCC5)CSC6=CC=CC=C6)S(=O)(=O)C(F)(F)F)C7=CC=C(C=C7)Cl)C		BCL2
4-[4-[[2-(4-chlorophenyl)-5,5-dimethylcyclohexen-1-yl]methyl]piperazin-1-yl]-N-[4-[[(2R)-4-morpholin-4-yl-1-phenylsulfanylbutan-2-yl]amino]-3-(trifluoromethylsulfonyl)phenyl]sulfonylbenzamide	CC1(CCC(=C(C1)CN2CCN(CC2)C3=CC=C(C=C3)C(=O)NS(=O)(=O)C4=CC(=C(C=C4)NC(CCN5CCOCC5)CSC6=CC=CC=C6)S(=O)(=O)C(F)(F)F)C7=CC=C(C=C7)Cl)C		BCL2L1
(6S)-1-[[4-(dimethylamino)-3-methylphenyl]methyl]-5-(2,2-diphenylacetyl)-6,7-dihydro-4H-imidazo[4,5-c]pyridine-6-carboxylic acid	CC1=C(C=CC(=C1)CN2C=NC3=C2CC(N(C3)C(=O)C(C4=CC=CC=C4)C5=CC=CC=C5)C(=O)O)N(C)C		TNF
2-[9,10-dimethoxy-4-oxo-2-(2,4,6-trimethylphenyl)imino-6,7-dihydropyrimido[6,1-a]isoquinolin-3-yl]ethylurea	CC1=CC(=C(C(=C1)C)N=C2C=C3C4=CC(=C(C=C4CCN3C(=O)N2CCNC(=O)N)OC)OC)C		PDE3A
2-[9,10-dimethoxy-4-oxo-2-(2,4,6-trimethylphenyl)imino-6,7-dihydropyrimido[6,1-a]isoquinolin-3-yl]ethylurea	CC1=CC(=C(C(=C1)C)N=C2C=C3C4=CC(=C(C=C4CCN3C(=O)N2CCNC(=O)N)OC)OC)C		PDE3B
2-[9,10-dimethoxy-4-oxo-2-(2,4,6-trimethylphenyl)imino-6,7-dihydropyrimido[6,1-a]isoquinolin-3-yl]ethylurea	CC1=CC(=C(C(=C1)C)N=C2C=C3C4=CC(=C(C=C4CCN3C(=O)N2CCNC(=O)N)OC)OC)C		PDE4B
2-[9,10-dimethoxy-4-oxo-2-(2,4,6-trimethylphenyl)imino-6,7-dihydropyrimido[6,1-a]isoquinolin-3-yl]ethylurea	CC1=CC(=C(C(=C1)C)N=C2C=C3C4=CC(=C(C=C4CCN3C(=O)N2CCNC(=O)N)OC)OC)C		PDE4C
2-[9,10-dimethoxy-4-oxo-2-(2,4,6-trimethylphenyl)imino-6,7-dihydropyrimido[6,1-a]isoquinolin-3-yl]ethylurea	CC1=CC(=C(C(=C1)C)N=C2C=C3C4=CC(=C(C=C4CCN3C(=O)N2CCNC(=O)N)OC)OC)C		PDE4D
N-[2-methyl-5-(methylaminomethyl)phenyl]-4-[(4-phenylquinazolin-2-yl)amino]benzamide	CC1=C(C=C(C=C1)CNC)NC(=O)C2=CC=C(C=C2)NC3=NC4=CC=CC=C4C(=N3)C5=CC=CC=C5		SMO
(2,6-dimethylphenyl) N-(2,4-dimethoxyphenyl)-N-[2-[4-(4-methylpiperazin-1-yl)anilino]pyrimidin-4-yl]carbamate	CC1=C(C(=CC=C1)C)OC(=O)N(C2=C(C=C(C=C2)OC)OC)C3=NC(=NC=C3)NC4=CC=C(C=C4)N5CCN(CC5)C		LCK
(2,6-dimethylphenyl) N-(2,4-dimethoxyphenyl)-N-[2-[4-(4-methylpiperazin-1-yl)anilino]pyrimidin-4-yl]carbamate	CC1=C(C(=CC=C1)C)OC(=O)N(C2=C(C=C(C=C2)OC)OC)C3=NC(=NC=C3)NC4=CC=C(C=C4)N5CCN(CC5)C		SRC
3-(2-aminoethyl)-5-methoxy-1-[(1R,2S,5R)-5-methyl-2-propan-2-ylcyclohexanecarbonyl]benzimidazol-2-one	CC1CCC(C(C1)C(=O)N2C3=C(C=C(C=C3)OC)N(C2=O)CCN)C(C)C		TRPM8
4-methyl-N-[3-(4-methylimidazol-1-yl)-5-(trifluoromethyl)phenyl]-3-[(4-pyridin-3-ylpyrimidin-2-yl)amino]benzamide	CC1=C(C=C(C=C1)C(=O)NC2=CC(=CC(=C2)C(F)(F)F)N3C=C(N=C3)C)NC4=NC=CC(=N4)C5=CN=CC=C5		ABL1
4-methyl-N-[3-(4-methylimidazol-1-yl)-5-(trifluoromethyl)phenyl]-3-[(4-pyridin-3-ylpyrimidin-2-yl)amino]benzamide	CC1=C(C=C(C=C1)C(=O)NC2=CC(=CC(=C2)C(F)(F)F)N3C=C(N=C3)C)NC4=NC=CC(=N4)C5=CN=CC=C5		KIT
4-methyl-N-[3-(4-methylimidazol-1-yl)-5-(trifluoromethyl)phenyl]-3-[(4-pyridin-3-ylpyrimidin-2-yl)amino]benzamide	CC1=C(C=C(C=C1)C(=O)NC2=CC(=CC(=C2)C(F)(F)F)N3C=C(N=C3)C)NC4=NC=CC(=N4)C5=CN=CC=C5		PDGFRA
4-methyl-N-[3-(4-methylimidazol-1-yl)-5-(trifluoromethyl)phenyl]-3-[(4-pyridin-3-ylpyrimidin-2-yl)amino]benzamide	CC1=C(C=C(C=C1)C(=O)NC2=CC(=CC(=C2)C(F)(F)F)N3C=C(N=C3)C)NC4=NC=CC(=N4)C5=CN=CC=C5		PDGFRB
4-methyl-N-[3-(4-methylimidazol-1-yl)-5-(trifluoromethyl)phenyl]-3-[(4-pyrazin-2-ylpyrimidin-2-yl)amino]benzamide	CC1=C(C=C(C=C1)C(=O)NC2=CC(=CC(=C2)C(F)(F)F)N3C=C(N=C3)C)NC4=NC=CC(=N4)C5=NC=CN=C5		ABL1
4-methyl-N-[3-(4-methylimidazol-1-yl)-5-(trifluoromethyl)phenyl]-3-[(4-pyrazin-2-ylpyrimidin-2-yl)amino]benzamide	CC1=C(C=C(C=C1)C(=O)NC2=CC(=CC(=C2)C(F)(F)F)N3C=C(N=C3)C)NC4=NC=CC(=N4)C5=NC=CN=C5		BCR
4-methyl-3-[(1-methyl-6-pyridin-3-ylpyrazolo[3,4-d]pyrimidin-4-yl)amino]-N-[3-(trifluoromethyl)phenyl]benzamide	CC1=C(C=C(C=C1)C(=O)NC2=CC=CC(=C2)C(F)(F)F)NC3=C4C=NN(C4=NC(=N3)C5=CN=CC=C5)C		ABL1
4-methyl-3-[(1-methyl-6-pyridin-3-ylpyrazolo[3,4-d]pyrimidin-4-yl)amino]-N-[3-(trifluoromethyl)phenyl]benzamide	CC1=C(C=C(C=C1)C(=O)NC2=CC=CC(=C2)C(F)(F)F)NC3=C4C=NN(C4=NC(=N3)C5=CN=CC=C5)C		EPHB4
4-methyl-3-[(1-methyl-6-pyridin-3-ylpyrazolo[3,4-d]pyrimidin-4-yl)amino]-N-[3-(trifluoromethyl)phenyl]benzamide	CC1=C(C=C(C=C1)C(=O)NC2=CC=CC(=C2)C(F)(F)F)NC3=C4C=NN(C4=NC(=N3)C5=CN=CC=C5)C		SRC
4-methyl-3-[(1-methyl-6-pyridin-3-ylpyrazolo[3,4-d]pyrimidin-4-yl)amino]-N-[3-(trifluoromethyl)phenyl]benzamide	CC1=C(C=C(C=C1)C(=O)NC2=CC=CC(=C2)C(F)(F)F)NC3=C4C=NN(C4=NC(=N3)C5=CN=CC=C5)C		ZHX2
4-methyl-N-[4-[(4-methylpiperazin-1-yl)methyl]-3-(trifluoromethyl)phenyl]-3-[2-(1H-pyrazolo[3,4-b]pyridin-5-yl)ethynyl]benzamide	CC1=C(C=C(C=C1)C(=O)NC2=CC(=C(C=C2)CN3CCN(CC3)C)C(F)(F)F)C#CC4=CC5=C(NN=C5)N=C4		ABL1
4-methyl-N-[4-[(4-methylpiperazin-1-yl)methyl]-3-(trifluoromethyl)phenyl]-3-[2-(1H-pyrazolo[3,4-b]pyridin-5-yl)ethynyl]benzamide	CC1=C(C=C(C=C1)C(=O)NC2=CC(=C(C=C2)CN3CCN(CC3)C)C(F)(F)F)C#CC4=CC5=C(NN=C5)N=C4		BCR
3-(2-imidazo[1,2-b]pyridazin-3-ylethynyl)-4-methyl-N-[4-[(4-methylpiperazin-1-yl)methyl]-3-(trifluoromethyl)phenyl]benzamide	CC1=C(C=C(C=C1)C(=O)NC2=CC(=C(C=C2)CN3CCN(CC3)C)C(F)(F)F)C#CC4=CN=C5N4N=CC=C5		ABL1
3-(2-imidazo[1,2-b]pyridazin-3-ylethynyl)-4-methyl-N-[4-[(4-methylpiperazin-1-yl)methyl]-3-(trifluoromethyl)phenyl]benzamide	CC1=C(C=C(C=C1)C(=O)NC2=CC(=C(C=C2)CN3CCN(CC3)C)C(F)(F)F)C#CC4=CN=C5N4N=CC=C5		BCR
3-(2-imidazo[1,2-b]pyridazin-3-ylethynyl)-4-methyl-N-[4-[(4-methylpiperazin-1-yl)methyl]-3-(trifluoromethyl)phenyl]benzamide	CC1=C(C=C(C=C1)C(=O)NC2=CC(=C(C=C2)CN3CCN(CC3)C)C(F)(F)F)C#CC4=CN=C5N4N=CC=C5		FGFR1
3-(2-imidazo[1,2-b]pyridazin-3-ylethynyl)-4-methyl-N-[4-[(4-methylpiperazin-1-yl)methyl]-3-(trifluoromethyl)phenyl]benzamide	CC1=C(C=C(C=C1)C(=O)NC2=CC(=C(C=C2)CN3CCN(CC3)C)C(F)(F)F)C#CC4=CN=C5N4N=CC=C5		FGFR2
3-(2-imidazo[1,2-b]pyridazin-3-ylethynyl)-4-methyl-N-[4-[(4-methylpiperazin-1-yl)methyl]-3-(trifluoromethyl)phenyl]benzamide	CC1=C(C=C(C=C1)C(=O)NC2=CC(=C(C=C2)CN3CCN(CC3)C)C(F)(F)F)C#CC4=CN=C5N4N=CC=C5		FGFR3
3-(2-imidazo[1,2-b]pyridazin-3-ylethynyl)-4-methyl-N-[4-[(4-methylpiperazin-1-yl)methyl]-3-(trifluoromethyl)phenyl]benzamide	CC1=C(C=C(C=C1)C(=O)NC2=CC(=C(C=C2)CN3CCN(CC3)C)C(F)(F)F)C#CC4=CN=C5N4N=CC=C5		FLT3
3-(2-imidazo[1,2-b]pyridazin-3-ylethynyl)-4-methyl-N-[4-[(4-methylpiperazin-1-yl)methyl]-3-(trifluoromethyl)phenyl]benzamide	CC1=C(C=C(C=C1)C(=O)NC2=CC(=C(C=C2)CN3CCN(CC3)C)C(F)(F)F)C#CC4=CN=C5N4N=CC=C5		KDR
3-(2-imidazo[1,2-b]pyridazin-3-ylethynyl)-4-methyl-N-[4-[(4-methylpiperazin-1-yl)methyl]-3-(trifluoromethyl)phenyl]benzamide	CC1=C(C=C(C=C1)C(=O)NC2=CC(=C(C=C2)CN3CCN(CC3)C)C(F)(F)F)C#CC4=CN=C5N4N=CC=C5		PDGFRA
3-(2-imidazo[1,2-b]pyridazin-3-ylethynyl)-4-methyl-N-[4-[(4-methylpiperazin-1-yl)methyl]-3-(trifluoromethyl)phenyl]benzamide	CC1=C(C=C(C=C1)C(=O)NC2=CC(=C(C=C2)CN3CCN(CC3)C)C(F)(F)F)C#CC4=CN=C5N4N=CC=C5		RET
3-(2-imidazo[1,2-b]pyridazin-3-ylethynyl)-4-methyl-N-[4-[(4-methylpiperazin-1-yl)methyl]-3-(trifluoromethyl)phenyl]benzamide	CC1=C(C=C(C=C1)C(=O)NC2=CC(=C(C=C2)CN3CCN(CC3)C)C(F)(F)F)C#CC4=CN=C5N4N=CC=C5		SRC
N-[2-methyl-5-[[3-(prop-2-enoylamino)-5-(trifluoromethyl)phenyl]carbamoyl]phenyl]-1,2-oxazole-5-carboxamide	CC1=C(C=C(C=C1)C(=O)NC2=CC(=CC(=C2)NC(=O)C=C)C(F)(F)F)NC(=O)C3=CC=NO3		DDR1
N-[4-[[3-(3,5-dimethoxyanilino)quinoxalin-2-yl]sulfamoyl]phenyl]-3-methoxy-4-methylbenzamide	CC1=C(C=C(C=C1)C(=O)NC2=CC=C(C=C2)S(=O)(=O)NC3=NC4=CC=CC=C4N=C3NC5=CC(=CC(=C5)OC)OC)OC		CRTC1
N-[4-[[3-(3,5-dimethoxyanilino)quinoxalin-2-yl]sulfamoyl]phenyl]-3-methoxy-4-methylbenzamide	CC1=C(C=C(C=C1)C(=O)NC2=CC=C(C=C2)S(=O)(=O)NC3=NC4=CC=CC=C4N=C3NC5=CC(=CC(=C5)OC)OC)OC		MTOR
N-[4-[[3-(3,5-dimethoxyanilino)quinoxalin-2-yl]sulfamoyl]phenyl]-3-methoxy-4-methylbenzamide	CC1=C(C=C(C=C1)C(=O)NC2=CC=C(C=C2)S(=O)(=O)NC3=NC4=CC=CC=C4N=C3NC5=CC(=CC(=C5)OC)OC)OC		PIK3CA
N-[4-[[3-(3,5-dimethoxyanilino)quinoxalin-2-yl]sulfamoyl]phenyl]-3-methoxy-4-methylbenzamide	CC1=C(C=C(C=C1)C(=O)NC2=CC=C(C=C2)S(=O)(=O)NC3=NC4=CC=CC=C4N=C3NC5=CC(=CC(=C5)OC)OC)OC		PIK3CB
N-[4-[[3-(3,5-dimethoxyanilino)quinoxalin-2-yl]sulfamoyl]phenyl]-3-methoxy-4-methylbenzamide	CC1=C(C=C(C=C1)C(=O)NC2=CC=C(C=C2)S(=O)(=O)NC3=NC4=CC=CC=C4N=C3NC5=CC(=CC(=C5)OC)OC)OC		PIK3CD
N-[4-[[3-(3,5-dimethoxyanilino)quinoxalin-2-yl]sulfamoyl]phenyl]-3-methoxy-4-methylbenzamide	CC1=C(C=C(C=C1)C(=O)NC2=CC=C(C=C2)S(=O)(=O)NC3=NC4=CC=CC=C4N=C3NC5=CC(=CC(=C5)OC)OC)OC		PIK3CG
(1S,3S,4R)-4-[(3aS,4R,5S,7aS)-4-(aminomethyl)-7a-methyl-1-methylidene-3,3a,4,5,6,7-hexahydro-2H-inden-5-yl]-3-(hydroxymethyl)-4-methylcyclohexan-1-ol	CC1(CCC(CC1CO)O)C2CCC3(C(C2CN)CCC3=C)C		INPP5D
6-[5-(cyclopropylcarbamoyl)-3-fluoro-2-methylphenyl]-N-(2,2-dimethylpropyl)pyridine-3-carboxamide	CC1=C(C=C(C=C1F)C(=O)NC2CC2)C3=NC=C(C=C3)C(=O)NCC(C)(C)C		MAPK11
1-[4-(3-amino-1H-indazol-4-yl)phenyl]-3-(2-fluoro-5-methylphenyl)urea	CC1=CC(=C(C=C1)F)NC(=O)NC2=CC=C(C=C2)C3=C4C(=CC=C3)NN=C4N		CSF1R
1-[4-(3-amino-1H-indazol-4-yl)phenyl]-3-(2-fluoro-5-methylphenyl)urea	CC1=CC(=C(C=C1)F)NC(=O)NC2=CC=C(C=C2)C3=C4C(=CC=C3)NN=C4N		FLT1
1-[4-(3-amino-1H-indazol-4-yl)phenyl]-3-(2-fluoro-5-methylphenyl)urea	CC1=CC(=C(C=C1)F)NC(=O)NC2=CC=C(C=C2)C3=C4C(=CC=C3)NN=C4N		FLT3
1-[4-(3-amino-1H-indazol-4-yl)phenyl]-3-(2-fluoro-5-methylphenyl)urea	CC1=CC(=C(C=C1)F)NC(=O)NC2=CC=C(C=C2)C3=C4C(=CC=C3)NN=C4N		FLT4
1-[4-(3-amino-1H-indazol-4-yl)phenyl]-3-(2-fluoro-5-methylphenyl)urea	CC1=CC(=C(C=C1)F)NC(=O)NC2=CC=C(C=C2)C3=C4C(=CC=C3)NN=C4N		KDR
1-[4-(3-amino-1H-indazol-4-yl)phenyl]-3-(2-fluoro-5-methylphenyl)urea	CC1=CC(=C(C=C1)F)NC(=O)NC2=CC=C(C=C2)C3=C4C(=CC=C3)NN=C4N		KIT
1-[4-(3-amino-1H-indazol-4-yl)phenyl]-3-(2-fluoro-5-methylphenyl)urea	CC1=CC(=C(C=C1)F)NC(=O)NC2=CC=C(C=C2)C3=C4C(=CC=C3)NN=C4N		PDGFRA
1-[4-(3-amino-1H-indazol-4-yl)phenyl]-3-(2-fluoro-5-methylphenyl)urea	CC1=CC(=C(C=C1)F)NC(=O)NC2=CC=C(C=C2)C3=C4C(=CC=C3)NN=C4N		PDGFRB
1-[5-tert-butyl-2-(4-methylphenyl)pyrazol-3-yl]-3-[4-(2-morpholin-4-ylethoxy)naphthalen-1-yl]urea	CC1=CC=C(C=C1)N2C(=CC(=N2)C(C)(C)C)NC(=O)NC3=CC=C(C4=CC=CC=C43)OCCN5CCOCC5		MAPK1
5-(4-cyclopropylimidazol-1-yl)-2-fluoro-4-methyl-N-[6-(4-propan-2-yl-1,2,4-triazol-3-yl)pyridin-2-yl]benzamide	CC1=CC(=C(C=C1N2C=C(N=C2)C3CC3)C(=O)NC4=CC=CC(=N4)C5=NN=CN5C(C)C)F		MAP3K5
1-[3-[4-(3-bromo-2H-pyrazolo[3,4-d]pyrimidin-4-yl)piperazin-1-yl]-4-methyl-5-(2-pyrrolidin-1-ylethylamino)phenyl]-4,4,4-trifluorobutan-1-one	CC1=C(C=C(C=C1N2CCN(CC2)C3=NC=NC4=NNC(=C43)Br)C(=O)CCC(F)(F)F)NCCN5CCCC5		AKT1
1-[3-[4-(3-bromo-2H-pyrazolo[3,4-d]pyrimidin-4-yl)piperazin-1-yl]-4-methyl-5-(2-pyrrolidin-1-ylethylamino)phenyl]-4,4,4-trifluorobutan-1-one	CC1=C(C=C(C=C1N2CCN(CC2)C3=NC=NC4=NNC(=C43)Br)C(=O)CCC(F)(F)F)NCCN5CCCC5		AKT2
1-[3-[4-(3-bromo-2H-pyrazolo[3,4-d]pyrimidin-4-yl)piperazin-1-yl]-4-methyl-5-(2-pyrrolidin-1-ylethylamino)phenyl]-4,4,4-trifluorobutan-1-one	CC1=C(C=C(C=C1N2CCN(CC2)C3=NC=NC4=NNC(=C43)Br)C(=O)CCC(F)(F)F)NCCN5CCCC5		AKT3
5-(hydroxymethyl)-3-(3-methylphenyl)-1,3-oxazolidin-2-one	CC1=CC(=CC=C1)N2CC(OC2=O)CO		MAOA
2-methyl-3-(2-methylphenyl)quinazolin-4-one	CC1=CC=CC=C1N2C(=NC3=CC=CC=C3C2=O)C		GABRA2
2-methyl-3-(2-methylphenyl)quinazolin-4-one	CC1=CC=CC=C1N2C(=NC3=CC=CC=C3C2=O)C		GABRA3
2-methyl-3-(2-methylphenyl)quinazolin-4-one	CC1=CC=CC=C1N2C(=NC3=CC=CC=C3C2=O)C		GABRB3
2-methyl-3-(2-methylphenyl)quinazolin-4-one	CC1=CC=CC=C1N2C(=NC3=CC=CC=C3C2=O)C		GABRE
2-methyl-3-(2-methylphenyl)quinazolin-4-one	CC1=CC=CC=C1N2C(=NC3=CC=CC=C3C2=O)C		GABRP
(7S)-3-fluoro-4-[3-(8-fluoro-1-methyl-2,4-dioxoquinazolin-3-yl)-2-methylphenyl]-7-(2-hydroxypropan-2-yl)-6,7,8,9-tetrahydro-5H-carbazole-1-carboxamide	CC1=C(C=CC=C1N2C(=O)C3=C(C(=CC=C3)F)N(C2=O)C)C4=C(C=C(C5=C4C6=C(N5)CC(CC6)C(C)(C)O)C(=O)N)F		BTK
N-[2-methyl-5-[2-oxo-9-(1H-pyrazol-4-yl)benzo[h][1,6]naphthyridin-1-yl]phenyl]prop-2-enamide	CC1=C(C=C(C=C1)N2C(=O)C=CC3=CN=C4C=CC(=CC4=C32)C5=CNN=C5)NC(=O)C=C		BTK
3-[3-[[2-(3,4-dimethylphenyl)-5-methyl-3-oxo-1H-pyrazol-4-yl]diazenyl]-2-hydroxyphenyl]benzoic acid	CC1=C(C=C(C=C1)N2C(=O)C(=C(N2)C)N=NC3=CC=CC(=C3O)C4=CC(=CC=C4)C(=O)O)C		MPL
2-[2-(2-chloro-6-fluoroanilino)-5-methylphenyl]acetic acid	CC1=CC(=C(C=C1)NC2=C(C=CC=C2Cl)F)CC(=O)O		PTGS2
2-(2,3-dimethylanilino)benzoic acid	CC1=C(C(=CC=C1)NC2=CC=CC=C2C(=O)O)C		PTGS1
2-(2,3-dimethylanilino)benzoic acid	CC1=C(C(=CC=C1)NC2=CC=CC=C2C(=O)O)C		PTGS2
N-[4-[(1R,3S,5S)-3-amino-5-methylcyclohexyl]pyridin-3-yl]-6-(2,6-difluorophenyl)-5-fluoropyridine-2-carboxamide	CC1CC(CC(C1)N)C2=C(C=NC=C2)NC(=O)C3=NC(=C(C=C3)F)C4=C(C=CC=C4F)F		PIM1
N-[4-[(1R,3S,5S)-3-amino-5-methylcyclohexyl]pyridin-3-yl]-6-(2,6-difluorophenyl)-5-fluoropyridine-2-carboxamide	CC1CC(CC(C1)N)C2=C(C=NC=C2)NC(=O)C3=NC(=C(C=C3)F)C4=C(C=CC=C4F)F		PIM2
(1S,2S,3R,4R)-3-[[5-fluoro-2-[3-methyl-4-(4-methylpiperazin-1-yl)anilino]pyrimidin-4-yl]amino]bicyclo[2.2.1]hept-5-ene-2-carboxamide	CC1=C(C=CC(=C1)NC2=NC=C(C(=N2)NC3C4CC(C3C(=O)N)C=C4)F)N5CCN(CC5)C		ABL1
(1S,2S,3R,4R)-3-[[5-fluoro-2-[3-methyl-4-(4-methylpiperazin-1-yl)anilino]pyrimidin-4-yl]amino]bicyclo[2.2.1]hept-5-ene-2-carboxamide	CC1=C(C=CC(=C1)NC2=NC=C(C(=N2)NC3C4CC(C3C(=O)N)C=C4)F)N5CCN(CC5)C		AKT1
(1S,2S,3R,4R)-3-[[5-fluoro-2-[3-methyl-4-(4-methylpiperazin-1-yl)anilino]pyrimidin-4-yl]amino]bicyclo[2.2.1]hept-5-ene-2-carboxamide	CC1=C(C=CC(=C1)NC2=NC=C(C(=N2)NC3C4CC(C3C(=O)N)C=C4)F)N5CCN(CC5)C		BTK
(1S,2S,3R,4R)-3-[[5-fluoro-2-[3-methyl-4-(4-methylpiperazin-1-yl)anilino]pyrimidin-4-yl]amino]bicyclo[2.2.1]hept-5-ene-2-carboxamide	CC1=C(C=CC(=C1)NC2=NC=C(C(=N2)NC3C4CC(C3C(=O)N)C=C4)F)N5CCN(CC5)C		FLT3
(1S,2S,3R,4R)-3-[[5-fluoro-2-[3-methyl-4-(4-methylpiperazin-1-yl)anilino]pyrimidin-4-yl]amino]bicyclo[2.2.1]hept-5-ene-2-carboxamide	CC1=C(C=CC(=C1)NC2=NC=C(C(=N2)NC3C4CC(C3C(=O)N)C=C4)F)N5CCN(CC5)C		KIT
(1S,2S,3R,4R)-3-[[5-fluoro-2-[3-methyl-4-(4-methylpiperazin-1-yl)anilino]pyrimidin-4-yl]amino]bicyclo[2.2.1]hept-5-ene-2-carboxamide	CC1=C(C=CC(=C1)NC2=NC=C(C(=N2)NC3C4CC(C3C(=O)N)C=C4)F)N5CCN(CC5)C		LYN
5-[[4-[(2,3-dimethylindazol-6-yl)-methylamino]pyrimidin-2-yl]amino]-2-methylbenzenesulfonamide	CC1=C(C=C(C=C1)NC2=NC=CC(=N2)N(C)C3=CC4=NN(C(=C4C=C3)C)C)S(=O)(=O)N		CSF1R
5-[[4-[(2,3-dimethylindazol-6-yl)-methylamino]pyrimidin-2-yl]amino]-2-methylbenzenesulfonamide	CC1=C(C=C(C=C1)NC2=NC=CC(=N2)N(C)C3=CC4=NN(C(=C4C=C3)C)C)S(=O)(=O)N		FLT1
5-[[4-[(2,3-dimethylindazol-6-yl)-methylamino]pyrimidin-2-yl]amino]-2-methylbenzenesulfonamide	CC1=C(C=C(C=C1)NC2=NC=CC(=N2)N(C)C3=CC4=NN(C(=C4C=C3)C)C)S(=O)(=O)N		FLT4
5-[[4-[(2,3-dimethylindazol-6-yl)-methylamino]pyrimidin-2-yl]amino]-2-methylbenzenesulfonamide	CC1=C(C=C(C=C1)NC2=NC=CC(=N2)N(C)C3=CC4=NN(C(=C4C=C3)C)C)S(=O)(=O)N		KDR
5-[[4-[(2,3-dimethylindazol-6-yl)-methylamino]pyrimidin-2-yl]amino]-2-methylbenzenesulfonamide	CC1=C(C=C(C=C1)NC2=NC=CC(=N2)N(C)C3=CC4=NN(C(=C4C=C3)C)C)S(=O)(=O)N		KIT
5-[[4-[(2,3-dimethylindazol-6-yl)-methylamino]pyrimidin-2-yl]amino]-2-methylbenzenesulfonamide	CC1=C(C=C(C=C1)NC2=NC=CC(=N2)N(C)C3=CC4=NN(C(=C4C=C3)C)C)S(=O)(=O)N		PDGFRA
5-[[4-[(2,3-dimethylindazol-6-yl)-methylamino]pyrimidin-2-yl]amino]-2-methylbenzenesulfonamide	CC1=C(C=C(C=C1)NC2=NC=CC(=N2)N(C)C3=CC4=NN(C(=C4C=C3)C)C)S(=O)(=O)N		PDGFRB
6-[5-[(2-methylsulfonylethylamino)methyl]furan-2-yl]-N-[3-methyl-4-([1,2,4]triazolo[1,5-a]pyridin-7-yloxy)phenyl]quinazolin-4-amine	CC1=C(C=CC(=C1)NC2=NC=NC3=C2C=C(C=C3)C4=CC=C(O4)CNCCS(=O)(=O)C)OC5=CC6=NC=NN6C=C5		EGFR
6-N-(4,4-dimethyl-5H-1,3-oxazol-2-yl)-4-N-[3-methyl-4-([1,2,4]triazolo[1,5-a]pyridin-7-yloxy)phenyl]quinazoline-4,6-diamine	CC1=C(C=CC(=C1)NC2=NC=NC3=C2C=C(C=C3)NC4=NC(CO4)(C)C)OC5=CC6=NC=NN6C=C5		EGFR
6-N-(4,4-dimethyl-5H-1,3-oxazol-2-yl)-4-N-[3-methyl-4-([1,2,4]triazolo[1,5-a]pyridin-7-yloxy)phenyl]quinazoline-4,6-diamine	CC1=C(C=CC(=C1)NC2=NC=NC3=C2C=C(C=C3)NC4=NC(CO4)(C)C)OC5=CC6=NC=NN6C=C5		ERBB2
5-[[4-[[6-(4-amino-3,5-dimethylphenoxy)-1-methylbenzimidazol-2-yl]methoxy]phenyl]methyl]-1,3-thiazolidine-2,4-dione	CC1=CC(=CC(=C1N)C)OC2=CC3=C(C=C2)N=C(N3C)COC4=CC=C(C=C4)CC5C(=O)NC(=O)S5		PPARG
3-(2-cyanopropan-2-yl)-N-[4-methyl-3-[(3-methyl-4-oxoquinazolin-6-yl)amino]phenyl]benzamide	CC1=C(C=C(C=C1)NC(=O)C2=CC(=CC=C2)C(C)(C)C#N)NC3=CC4=C(C=C3)N=CN(C4=O)C		BRAF
4-[[(3S)-3-(dimethylamino)pyrrolidin-1-yl]methyl]-N-[4-methyl-3-[(4-pyrimidin-5-ylpyrimidin-2-yl)amino]phenyl]-3-(trifluoromethyl)benzamide	CC1=C(C=C(C=C1)NC(=O)C2=CC(=C(C=C2)CN3CCC(C3)N(C)C)C(F)(F)F)NC4=NC=CC(=N4)C5=CN=CN=C5		ABL1
4-[[(3S)-3-(dimethylamino)pyrrolidin-1-yl]methyl]-N-[4-methyl-3-[(4-pyrimidin-5-ylpyrimidin-2-yl)amino]phenyl]-3-(trifluoromethyl)benzamide	CC1=C(C=C(C=C1)NC(=O)C2=CC(=C(C=C2)CN3CCC(C3)N(C)C)C(F)(F)F)NC4=NC=CC(=N4)C5=CN=CN=C5		LYN
4-[(4-methylpiperazin-1-yl)methyl]-N-[4-methyl-3-[(4-pyridin-3-ylpyrimidin-2-yl)amino]phenyl]benzamide	CC1=C(C=C(C=C1)NC(=O)C2=CC=C(C=C2)CN3CCN(CC3)C)NC4=NC=CC(=N4)C5=CN=CC=C5		ABL1
4-[(4-methylpiperazin-1-yl)methyl]-N-[4-methyl-3-[(4-pyridin-3-ylpyrimidin-2-yl)amino]phenyl]benzamide	CC1=C(C=C(C=C1)NC(=O)C2=CC=C(C=C2)CN3CCN(CC3)C)NC4=NC=CC(=N4)C5=CN=CC=C5		BCR
4-[(4-methylpiperazin-1-yl)methyl]-N-[4-methyl-3-[(4-pyridin-3-ylpyrimidin-2-yl)amino]phenyl]benzamide	CC1=C(C=C(C=C1)NC(=O)C2=CC=C(C=C2)CN3CCN(CC3)C)NC4=NC=CC(=N4)C5=CN=CC=C5		KIT
4-[(4-methylpiperazin-1-yl)methyl]-N-[4-methyl-3-[(4-pyridin-3-ylpyrimidin-2-yl)amino]phenyl]benzamide	CC1=C(C=C(C=C1)NC(=O)C2=CC=C(C=C2)CN3CCN(CC3)C)NC4=NC=CC(=N4)C5=CN=CC=C5		PDGFRB
4-[(4-methylpiperazin-1-yl)methyl]-N-[4-methyl-3-[(4-pyridin-3-yl-1,3-thiazol-2-yl)amino]phenyl]benzamide	CC1=C(C=C(C=C1)NC(=O)C2=CC=C(C=C2)CN3CCN(CC3)C)NC4=NC(=CS4)C5=CN=CC=C5		FGFR1
4-[(4-methylpiperazin-1-yl)methyl]-N-[4-methyl-3-[(4-pyridin-3-yl-1,3-thiazol-2-yl)amino]phenyl]benzamide	CC1=C(C=C(C=C1)NC(=O)C2=CC=C(C=C2)CN3CCN(CC3)C)NC4=NC(=CS4)C5=CN=CC=C5		FGFR2
4-[(4-methylpiperazin-1-yl)methyl]-N-[4-methyl-3-[(4-pyridin-3-yl-1,3-thiazol-2-yl)amino]phenyl]benzamide	CC1=C(C=C(C=C1)NC(=O)C2=CC=C(C=C2)CN3CCN(CC3)C)NC4=NC(=CS4)C5=CN=CC=C5		FGFR3
4-[(4-methylpiperazin-1-yl)methyl]-N-[4-methyl-3-[(4-pyridin-3-yl-1,3-thiazol-2-yl)amino]phenyl]benzamide	CC1=C(C=C(C=C1)NC(=O)C2=CC=C(C=C2)CN3CCN(CC3)C)NC4=NC(=CS4)C5=CN=CC=C5		KIT
4-[(4-methylpiperazin-1-yl)methyl]-N-[4-methyl-3-[(4-pyridin-3-yl-1,3-thiazol-2-yl)amino]phenyl]benzamide	CC1=C(C=C(C=C1)NC(=O)C2=CC=C(C=C2)CN3CCN(CC3)C)NC4=NC(=CS4)C5=CN=CC=C5		LYN
4-[(4-methylpiperazin-1-yl)methyl]-N-[4-methyl-3-[(4-pyridin-3-yl-1,3-thiazol-2-yl)amino]phenyl]benzamide	CC1=C(C=C(C=C1)NC(=O)C2=CC=C(C=C2)CN3CCN(CC3)C)NC4=NC(=CS4)C5=CN=CC=C5		PDGFRA
4-[(4-methylpiperazin-1-yl)methyl]-N-[4-methyl-3-[(4-pyridin-3-yl-1,3-thiazol-2-yl)amino]phenyl]benzamide	CC1=C(C=C(C=C1)NC(=O)C2=CC=C(C=C2)CN3CCN(CC3)C)NC4=NC(=CS4)C5=CN=CC=C5		PDGFRB
4-[(4-methylpiperazin-1-yl)methyl]-N-[4-methyl-3-[(4-pyridin-3-yl-1,3-thiazol-2-yl)amino]phenyl]benzamide	CC1=C(C=C(C=C1)NC(=O)C2=CC=C(C=C2)CN3CCN(CC3)C)NC4=NC(=CS4)C5=CN=CC=C5		PTK2
N-[3-[2-(2-hydroxyethoxy)-6-morpholin-4-ylpyridin-4-yl]-4-methylphenyl]-2-(trifluoromethyl)pyridine-4-carboxamide	CC1=C(C=C(C=C1)NC(=O)C2=CC(=NC=C2)C(F)(F)F)C3=CC(=NC(=C3)OCCO)N4CCOCC4		BRAF
N-[3-[2-(2-hydroxyethoxy)-6-morpholin-4-ylpyridin-4-yl]-4-methylphenyl]-2-(trifluoromethyl)pyridine-4-carboxamide	CC1=C(C=C(C=C1)NC(=O)C2=CC(=NC=C2)C(F)(F)F)C3=CC(=NC(=C3)OCCO)N4CCOCC4		RAF1
2-[4-[2-(3,5-dimethylanilino)-2-oxoethyl]phenoxy]-2-methylpropanoic acid	CC1=CC(=CC(=C1)NC(=O)CC2=CC=C(C=C2)OC(C)(C)C(=O)O)C		HBA1
2-[4-[2-(3,5-dimethylanilino)-2-oxoethyl]phenoxy]-2-methylpropanoic acid	CC1=CC(=CC(=C1)NC(=O)CC2=CC=C(C=C2)OC(C)(C)C(=O)O)C		HBA2
(4S)-6-(2-chloro-4-methylanilino)-4-[4-cyclopropyl-5-[3-(2,2-dimethylpropyl)cyclobutyl]-1,2-oxazol-3-yl]-6-oxohexanoic acid	CC1=CC(=C(C=C1)NC(=O)CC(CCC(=O)O)C2=NOC(=C2C3CC3)C4CC(C4)CC(C)(C)C)Cl		RORC
(4S)-4-amino-5-[(4,4-dimethylcyclohexyl)amino]-5-oxopentanoic acid	CC1(CCC(CC1)NC(=O)C(CCC(=O)O)N)C		GRIN2A
(4S)-4-amino-5-[(4,4-dimethylcyclohexyl)amino]-5-oxopentanoic acid	CC1(CCC(CC1)NC(=O)C(CCC(=O)O)N)C		GRIN2D
1-[(3R)-5-(3-azabicyclo[3.2.2]nonan-3-yl)-1-methyl-2-oxo-3H-1,4-benzodiazepin-3-yl]-3-(3-methylphenyl)urea	CC1=CC(=CC=C1)NC(=O)NC2C(=O)N(C3=CC=CC=C3C(=N2)N4CC5CCC(C4)CC5)C		KDR
5-(3-methylphenoxy)-1H-pyrimidin-2-one	CC1=CC(=CC=C1)OC2=CNC(=O)N=C2		LYN
N-[5-[2-(cyclopropanecarbonylamino)imidazo[1,2-b]pyridazin-6-yl]oxy-2-methylphenyl]-2,5-dimethylpyrazole-3-carboxamide	CC1=C(C=C(C=C1)OC2=NN3C=C(N=C3C=C2)NC(=O)C4CC4)NC(=O)C5=CC(=NN5C)C		FLT1
N-[5-[2-(cyclopropanecarbonylamino)imidazo[1,2-b]pyridazin-6-yl]oxy-2-methylphenyl]-2,5-dimethylpyrazole-3-carboxamide	CC1=C(C=C(C=C1)OC2=NN3C=C(N=C3C=C2)NC(=O)C4CC4)NC(=O)C5=CC(=NN5C)C		FLT4
N-[5-[2-(cyclopropanecarbonylamino)imidazo[1,2-b]pyridazin-6-yl]oxy-2-methylphenyl]-2,5-dimethylpyrazole-3-carboxamide	CC1=C(C=C(C=C1)OC2=NN3C=C(N=C3C=C2)NC(=O)C4CC4)NC(=O)C5=CC(=NN5C)C		KDR
N-[5-[2-(cyclopropanecarbonylamino)imidazo[1,2-b]pyridazin-6-yl]oxy-2-methylphenyl]-2,5-dimethylpyrazole-3-carboxamide	CC1=C(C=C(C=C1)OC2=NN3C=C(N=C3C=C2)NC(=O)C4CC4)NC(=O)C5=CC(=NN5C)C		PDGFRA
N-[5-[2-(cyclopropanecarbonylamino)imidazo[1,2-b]pyridazin-6-yl]oxy-2-methylphenyl]-2,5-dimethylpyrazole-3-carboxamide	CC1=C(C=C(C=C1)OC2=NN3C=C(N=C3C=C2)NC(=O)C4CC4)NC(=O)C5=CC(=NN5C)C		PDGFRB
(1R,2S,5R)-5-methyl-2-propan-2-ylcyclohexan-1-ol	CC1CCC(C(C1)O)C(C)C		TRPA1
(1R,2S,5R)-5-methyl-2-propan-2-ylcyclohexan-1-ol	CC1CCC(C(C1)O)C(C)C		TRPM8
[(2R)-3-(4-hydroxy-3,5-dimethylphenyl)-1-(4-morpholin-4-ylpiperidin-1-yl)-1-oxopropan-2-yl] 4-(2-oxo-4,5-dihydro-1H-1,3-benzodiazepin-3-yl)piperidine-1-carboxylate	CC1=CC(=CC(=C1O)C)CC(C(=O)N2CCC(CC2)N3CCOCC3)OC(=O)N4CCC(CC4)N5CCC6=CC=CC=C6NC5=O		CALCRL
2-[4-(2-hydroxyethoxy)-3,5-dimethylphenyl]-5,7-dimethoxy-3H-quinazolin-4-one	CC1=CC(=CC(=C1OCCO)C)C2=NC3=C(C(=CC(=C3)OC)OC)C(=O)N2		BRD3
2-[4-(2-hydroxyethoxy)-3,5-dimethylphenyl]-5,7-dimethoxy-3H-quinazolin-4-one	CC1=CC(=CC(=C1OCCO)C)C2=NC3=C(C(=CC(=C3)OC)OC)C(=O)N2		BRD4
1-(2-methoxy-5-methylphenyl)-3-[6-[[6-methoxy-7-[3-(4-methylpiperazin-1-yl)propoxy]quinazolin-4-yl]amino]-1,3-benzothiazol-2-yl]urea	CC1=CC(=C(C=C1)OC)NC(=O)NC2=NC3=C(S2)C=C(C=C3)NC4=NC=NC5=CC(=C(C=C54)OC)OCCCN6CCN(CC6)C		FLT1
1-(2-methoxy-5-methylphenyl)-3-[6-[[6-methoxy-7-[3-(4-methylpiperazin-1-yl)propoxy]quinazolin-4-yl]amino]-1,3-benzothiazol-2-yl]urea	CC1=CC(=C(C=C1)OC)NC(=O)NC2=NC3=C(S2)C=C(C=C3)NC4=NC=NC5=CC(=C(C=C54)OC)OCCCN6CCN(CC6)C		FLT3
1-(2-methoxy-5-methylphenyl)-3-[6-[[6-methoxy-7-[3-(4-methylpiperazin-1-yl)propoxy]quinazolin-4-yl]amino]-1,3-benzothiazol-2-yl]urea	CC1=CC(=C(C=C1)OC)NC(=O)NC2=NC3=C(S2)C=C(C=C3)NC4=NC=NC5=CC(=C(C=C54)OC)OCCCN6CCN(CC6)C		FLT4
1-(2-methoxy-5-methylphenyl)-3-[6-[[6-methoxy-7-[3-(4-methylpiperazin-1-yl)propoxy]quinazolin-4-yl]amino]-1,3-benzothiazol-2-yl]urea	CC1=CC(=C(C=C1)OC)NC(=O)NC2=NC3=C(S2)C=C(C=C3)NC4=NC=NC5=CC(=C(C=C54)OC)OCCCN6CCN(CC6)C		KDR
[4-[2-(dimethylamino)ethoxy]-2-methyl-5-propan-2-ylphenyl] acetate	CC1=CC(=C(C=C1OC(=O)C)C(C)C)OCCN(C)C		ADRA1B
[4-[2-(dimethylamino)ethoxy]-2-methyl-5-propan-2-ylphenyl] acetate	CC1=CC(=C(C=C1OC(=O)C)C(C)C)OCCN(C)C		ADRA2C
(3S,4aS,8aS)-N-tert-butyl-2-[(2R,3R)-2-hydroxy-3-[(3-hydroxy-2-methylbenzoyl)amino]-4-phenylsulfanylbutyl]-3,4,4a,5,6,7,8,8a-octahydro-1H-isoquinoline-3-carboxamide	CC1=C(C=CC=C1O)C(=O)NC(CSC2=CC=CC=C2)C(CN3CC4CCCCC4CC3C(=O)NC(C)(C)C)O		AKT1
N-[5-[5-(4-acetylpiperazine-1-carbonyl)-4-methoxy-2-methylphenyl]sulfanyl-1,3-thiazol-2-yl]-4-[(3-methylbutan-2-ylamino)methyl]benzamide	CC1=CC(=C(C=C1SC2=CN=C(S2)NC(=O)C3=CC=C(C=C3)CNC(C)C(C)C)C(=O)N4CCN(CC4)C(=O)C)OC		ITK
2-[4-[[2-[2-fluoro-4-(trifluoromethyl)phenyl]-4-methyl-1,3-thiazol-5-yl]methylsulfanyl]-2-methylphenoxy]-2-methylpropanoic acid	CC1=C(C=CC(=C1)SCC2=C(N=C(S2)C3=C(C=C(C=C3)C(F)(F)F)F)C)OC(C)(C)C(=O)O		PPARG
N-[[4-(4,5-dihydro-1H-imidazol-2-yl)phenyl]methyl]-2-[2-[(4-methoxy-2,6-dimethylphenyl)sulfonyl-methylamino]ethoxy]-N-methylacetamide	CC1=CC(=CC(=C1S(=O)(=O)N(C)CCOCC(=O)N(C)CC2=CC=C(C=C2)C3=NCCN3)C)OC		BDKRB1
1-(3,3a,4,5,6,6a-hexahydro-1H-cyclopenta[c]pyrrol-2-yl)-3-(4-methylphenyl)sulfonylurea	CC1=CC=C(C=C1)S(=O)(=O)NC(=O)NN2CC3CCCC3C2		KCNJ11
1-(azepan-1-yl)-3-(4-methylphenyl)sulfonylurea	CC1=CC=C(C=C1)S(=O)(=O)NC(=O)NN2CCCCCC2		KCNJ11
(4R,5S,6S,7R,9R,10R,11E,13E,16R)-10-[(2R,4R,5S,6S)-4,5-dihydroxy-4,6-dimethyloxan-2-yl]oxy-6-[(2S,3R,4R,5S,6R)-5-[(2R,4R,5S,6S)-4,5-dihydroxy-4,6-dimethyloxan-2-yl]oxy-4-(dimethylamino)-3-hydroxy-6-methyloxan-2-yl]oxy-4-hydroxy-7-(2-hydroxyethyl)-5-methoxy-9,16-dimethyl-1-oxacyclohexadeca-11,13-dien-2-one	CC1CC=CC=CC(C(CC(C(C(C(CC(=O)O1)O)OC)OC2C(C(C(C(O2)C)OC3CC(C(C(O3)C)O)(C)O)N(C)C)O)CCO)C)OC4CC(C(C(O4)C)O)(C)O		EPOR
[(4E,6Z,8S,9S,10E,12S,13R,14S,16R)-13,20,22-trihydroxy-8,14-dimethoxy-4,10,12,16-tetramethyl-3-oxo-19-(prop-2-enylamino)-2-azabicyclo[16.3.1]docosa-1(21),4,6,10,18(22),19-hexaen-9-yl] carbamate	CC1CC(C(C(C=C(C(C(C=CC=C(C(=O)NC2=CC(=C(C(=C2O)C1)NCC=C)O)C)OC)OC(=O)N)C)C)O)OC		HSP90AA1
[(4E,6Z,8S,9S,10E,12S,13R,14S,16R)-13-hydroxy-8,14-dimethoxy-4,10,12,16-tetramethyl-3,20,22-trioxo-19-(prop-2-enylamino)-2-azabicyclo[16.3.1]docosa-1(21),4,6,10,18-pentaen-9-yl] carbamate	CC1CC(C(C(C=C(C(C(C=CC=C(C(=O)NC2=CC(=O)C(=C(C1)C2=O)NCC=C)C)OC)OC(=O)N)C)C)O)OC		HSP90AA1
[(4E,6Z,8S,9S,10E,12S,13R,14S,16R)-13-hydroxy-8,14-dimethoxy-4,10,12,16-tetramethyl-3,20,22-trioxo-19-(prop-2-enylamino)-2-azabicyclo[16.3.1]docosa-1(21),4,6,10,18-pentaen-9-yl] carbamate	CC1CC(C(C(C=C(C(C(C=CC=C(C(=O)NC2=CC(=O)C(=C(C1)C2=O)NCC=C)C)OC)OC(=O)N)C)C)O)OC		HSP90AB1
[(4E,6Z,8S,9S,10E,12S,13R,14S,16R)-19-[2-(dimethylamino)ethylamino]-13-hydroxy-8,14-dimethoxy-4,10,12,16-tetramethyl-3,20,22-trioxo-2-azabicyclo[16.3.1]docosa-1(21),4,6,10,18-pentaen-9-yl] carbamate	CC1CC(C(C(C=C(C(C(C=CC=C(C(=O)NC2=CC(=O)C(=C(C1)C2=O)NCCN(C)C)C)OC)OC(=O)N)C)C)O)OC		HSP90AA1
[(4E,6Z,8S,9S,10E,12S,13R,14S,16R)-19-[2-(dimethylamino)ethylamino]-13-hydroxy-8,14-dimethoxy-4,10,12,16-tetramethyl-3,20,22-trioxo-2-azabicyclo[16.3.1]docosa-1(21),4,6,10,18-pentaen-9-yl] carbamate	CC1CC(C(C(C=C(C(C(C=CC=C(C(=O)NC2=CC(=O)C(=C(C1)C2=O)NCCN(C)C)C)OC)OC(=O)N)C)C)O)OC		HSP90AB1
(4S,7R,8S,9S,10E,13Z,16S)-4,8-dihydroxy-5,5,7,9,13-pentamethyl-16-[(E)-1-(2-methyl-1,3-thiazol-4-yl)prop-1-en-2-yl]-1-oxacyclohexadeca-10,13-diene-2,6-dione	CC1C=CCC(=CCC(OC(=O)CC(C(C(=O)C(C1O)C)(C)C)O)C(=CC2=CSC(=N2)C)C)C		TUBA1A
(4S,7R,8S,9S,10E,13Z,16S)-4,8-dihydroxy-5,5,7,9,13-pentamethyl-16-[(E)-1-(2-methyl-1,3-thiazol-4-yl)prop-1-en-2-yl]-1-oxacyclohexadeca-10,13-diene-2,6-dione	CC1C=CCC(=CCC(OC(=O)CC(C(C(=O)C(C1O)C)(C)C)O)C(=CC2=CSC(=N2)C)C)C		TUBA1C
(4S,7R,8S,9S,10E,13Z,16S)-4,8-dihydroxy-5,5,7,9,13-pentamethyl-16-[(E)-1-(2-methyl-1,3-thiazol-4-yl)prop-1-en-2-yl]-1-oxacyclohexadeca-10,13-diene-2,6-dione	CC1C=CCC(=CCC(OC(=O)CC(C(C(=O)C(C1O)C)(C)C)O)C(=CC2=CSC(=N2)C)C)C		TUBA3C
(4S,7R,8S,9S,10E,13Z,16S)-4,8-dihydroxy-5,5,7,9,13-pentamethyl-16-[(E)-1-(2-methyl-1,3-thiazol-4-yl)prop-1-en-2-yl]-1-oxacyclohexadeca-10,13-diene-2,6-dione	CC1C=CCC(=CCC(OC(=O)CC(C(C(=O)C(C1O)C)(C)C)O)C(=CC2=CSC(=N2)C)C)C		TUBA4A
(4S,7R,8S,9S,10E,13Z,16S)-4,8-dihydroxy-5,5,7,9,13-pentamethyl-16-[(E)-1-(2-methyl-1,3-thiazol-4-yl)prop-1-en-2-yl]-1-oxacyclohexadeca-10,13-diene-2,6-dione	CC1C=CCC(=CCC(OC(=O)CC(C(C(=O)C(C1O)C)(C)C)O)C(=CC2=CSC(=N2)C)C)C		TUBB2A
(4S,7R,8S,9S,10E,13Z,16S)-4,8-dihydroxy-5,5,7,9,13-pentamethyl-16-[(E)-1-(2-methyl-1,3-thiazol-4-yl)prop-1-en-2-yl]-1-oxacyclohexadeca-10,13-diene-2,6-dione	CC1C=CCC(=CCC(OC(=O)CC(C(C(=O)C(C1O)C)(C)C)O)C(=CC2=CSC(=N2)C)C)C		TUBB2B
(4S,7R,8S,9S,10E,13Z,16S)-4,8-dihydroxy-5,5,7,9,13-pentamethyl-16-[(E)-1-(2-methyl-1,3-thiazol-4-yl)prop-1-en-2-yl]-1-oxacyclohexadeca-10,13-diene-2,6-dione	CC1C=CCC(=CCC(OC(=O)CC(C(C(=O)C(C1O)C)(C)C)O)C(=CC2=CSC(=N2)C)C)C		TUBB3
(4S,7R,8S,9S,10E,13Z,16S)-4,8-dihydroxy-5,5,7,9,13-pentamethyl-16-[(E)-1-(2-methyl-1,3-thiazol-4-yl)prop-1-en-2-yl]-1-oxacyclohexadeca-10,13-diene-2,6-dione	CC1C=CCC(=CCC(OC(=O)CC(C(C(=O)C(C1O)C)(C)C)O)C(=CC2=CSC(=N2)C)C)C		TUBB4A
(4S,7R,8S,9S,10E,13Z,16S)-4,8-dihydroxy-5,5,7,9,13-pentamethyl-16-[(E)-1-(2-methyl-1,3-thiazol-4-yl)prop-1-en-2-yl]-1-oxacyclohexadeca-10,13-diene-2,6-dione	CC1C=CCC(=CCC(OC(=O)CC(C(C(=O)C(C1O)C)(C)C)O)C(=CC2=CSC(=N2)C)C)C		TUBB6
(4S,7R,8S,9S,13Z,16S)-4,8-dihydroxy-5,5,7,9,13-pentamethyl-16-[(E)-1-(2-methyl-1,3-thiazol-4-yl)prop-1-en-2-yl]-1-oxacyclohexadec-13-ene-2,6-dione	CC1CCCC(=CCC(OC(=O)CC(C(C(=O)C(C1O)C)(C)C)O)C(=CC2=CSC(=N2)C)C)C		TUBA1A
(4S,7R,8S,9S,13Z,16S)-4,8-dihydroxy-5,5,7,9,13-pentamethyl-16-[(E)-1-(2-methyl-1,3-thiazol-4-yl)prop-1-en-2-yl]-1-oxacyclohexadec-13-ene-2,6-dione	CC1CCCC(=CCC(OC(=O)CC(C(C(=O)C(C1O)C)(C)C)O)C(=CC2=CSC(=N2)C)C)C		TUBA1C
(4S,7R,8S,9S,13Z,16S)-4,8-dihydroxy-5,5,7,9,13-pentamethyl-16-[(E)-1-(2-methyl-1,3-thiazol-4-yl)prop-1-en-2-yl]-1-oxacyclohexadec-13-ene-2,6-dione	CC1CCCC(=CCC(OC(=O)CC(C(C(=O)C(C1O)C)(C)C)O)C(=CC2=CSC(=N2)C)C)C		TUBA3C
(4S,7R,8S,9S,13Z,16S)-4,8-dihydroxy-5,5,7,9,13-pentamethyl-16-[(E)-1-(2-methyl-1,3-thiazol-4-yl)prop-1-en-2-yl]-1-oxacyclohexadec-13-ene-2,6-dione	CC1CCCC(=CCC(OC(=O)CC(C(C(=O)C(C1O)C)(C)C)O)C(=CC2=CSC(=N2)C)C)C		TUBA4A
(4S,7R,8S,9S,13Z,16S)-4,8-dihydroxy-5,5,7,9,13-pentamethyl-16-[(E)-1-(2-methyl-1,3-thiazol-4-yl)prop-1-en-2-yl]-1-oxacyclohexadec-13-ene-2,6-dione	CC1CCCC(=CCC(OC(=O)CC(C(C(=O)C(C1O)C)(C)C)O)C(=CC2=CSC(=N2)C)C)C		TUBB2A
(4S,7R,8S,9S,13Z,16S)-4,8-dihydroxy-5,5,7,9,13-pentamethyl-16-[(E)-1-(2-methyl-1,3-thiazol-4-yl)prop-1-en-2-yl]-1-oxacyclohexadec-13-ene-2,6-dione	CC1CCCC(=CCC(OC(=O)CC(C(C(=O)C(C1O)C)(C)C)O)C(=CC2=CSC(=N2)C)C)C		TUBB2B
(4S,7R,8S,9S,13Z,16S)-4,8-dihydroxy-5,5,7,9,13-pentamethyl-16-[(E)-1-(2-methyl-1,3-thiazol-4-yl)prop-1-en-2-yl]-1-oxacyclohexadec-13-ene-2,6-dione	CC1CCCC(=CCC(OC(=O)CC(C(C(=O)C(C1O)C)(C)C)O)C(=CC2=CSC(=N2)C)C)C		TUBB3
(4S,7R,8S,9S,13Z,16S)-4,8-dihydroxy-5,5,7,9,13-pentamethyl-16-[(E)-1-(2-methyl-1,3-thiazol-4-yl)prop-1-en-2-yl]-1-oxacyclohexadec-13-ene-2,6-dione	CC1CCCC(=CCC(OC(=O)CC(C(C(=O)C(C1O)C)(C)C)O)C(=CC2=CSC(=N2)C)C)C		TUBB4A
(4S,7R,8S,9S,13Z,16S)-4,8-dihydroxy-5,5,7,9,13-pentamethyl-16-[(E)-1-(2-methyl-1,3-thiazol-4-yl)prop-1-en-2-yl]-1-oxacyclohexadec-13-ene-2,6-dione	CC1CCCC(=CCC(OC(=O)CC(C(C(=O)C(C1O)C)(C)C)O)C(=CC2=CSC(=N2)C)C)C		TUBB6
3-O-methyl 5-O-propan-2-yl 4-(2,1,3-benzoxadiazol-4-yl)-2,6-dimethyl-1,4-dihydropyridine-3,5-dicarboxylate	CC1=C(C(C(=C(N1)C)C(=O)OC(C)C)C2=CC=CC3=NON=C32)C(=O)OC		CACNA1C
3-O-methyl 5-O-propan-2-yl 4-(2,1,3-benzoxadiazol-4-yl)-2,6-dimethyl-1,4-dihydropyridine-3,5-dicarboxylate	CC1=C(C(C(=C(N1)C)C(=O)OC(C)C)C2=CC=CC3=NON=C32)C(=O)OC		CACNA1D
6-(2-chloro-6-methylpyridin-4-yl)-5-(4-fluorophenyl)-1,2,4-triazin-3-amine	CC1=CC(=CC(=N1)Cl)C2=C(N=C(N=N2)N)C3=CC=C(C=C3)F		ADORA2A
5-[[(5-chloro-2-methylpyridin-3-yl)amino]methyl]-N-[(2S)-3-cyclopentyl-1-(cyclopropylamino)-1-oxopropan-2-yl]thiophene-2-carboxamide	CC1=C(C=C(C=N1)Cl)NCC2=CC=C(S2)C(=O)NC(CC3CCCC3)C(=O)NC4CC4		PPM1D
1-[(2S,5R)-2-methyl-5-(7H-pyrrolo[2,3-d]pyrimidin-4-ylamino)piperidin-1-yl]prop-2-en-1-one	CC1CCC(CN1C(=O)C=C)NC2=NC=NC3=C2C=CN3		BTK
1-[(2S,5R)-2-methyl-5-(7H-pyrrolo[2,3-d]pyrimidin-4-ylamino)piperidin-1-yl]prop-2-en-1-one	CC1CCC(CN1C(=O)C=C)NC2=NC=NC3=C2C=CN3		ITK
1-[(2S,5R)-2-methyl-5-(7H-pyrrolo[2,3-d]pyrimidin-4-ylamino)piperidin-1-yl]prop-2-en-1-one	CC1CCC(CN1C(=O)C=C)NC2=NC=NC3=C2C=CN3		JAK3
N-[8-[(2R)-2-hydroxy-3-morpholin-4-ylpropoxy]-7-methoxy-2,3-dihydro-1H-imidazo[1,2-c]quinazolin-5-ylidene]-2-methylpyridine-3-carboxamide	CC1=C(C=CC=N1)C(=O)N=C2N=C3C(=C4N2CCN4)C=CC(=C3OC)OCC(CN5CCOCC5)O		PIK3CA
N-[8-[(2R)-2-hydroxy-3-morpholin-4-ylpropoxy]-7-methoxy-2,3-dihydro-1H-imidazo[1,2-c]quinazolin-5-ylidene]-2-methylpyridine-3-carboxamide	CC1=C(C=CC=N1)C(=O)N=C2N=C3C(=C4N2CCN4)C=CC(=C3OC)OCC(CN5CCOCC5)O		PIK3CB
(4bS,7R,8aR)-4b-benzyl-7-hydroxy-N-(2-methylpyridin-3-yl)-7-(trifluoromethyl)-5,6,8,8a,9,10-hexahydrophenanthrene-2-carboxamide	CC1=C(C=CC=N1)NC(=O)C2=CC3=C(C=C2)C4(CCC(CC4CC3)(C(F)(F)F)O)CC5=CC=CC=C5		NR3C1
4-[(4-methylpiperazin-1-yl)methyl]-N-[6-methyl-5-[(4-pyridin-3-ylpyrimidin-2-yl)amino]pyridin-3-yl]-3-(trifluoromethyl)benzamide	CC1=C(C=C(C=N1)NC(=O)C2=CC(=C(C=C2)CN3CCN(CC3)C)C(F)(F)F)NC4=NC=CC(=N4)C5=CN=CC=C5		ABL1
2-methyl-3-[[(2S)-pyrrolidin-2-yl]methoxy]pyridine	CC1=C(C=CC=N1)OCC2CCCN2		CHRNA5
2-methyl-3-[[(2S)-pyrrolidin-2-yl]methoxy]pyridine	CC1=C(C=CC=N1)OCC2CCCN2		CHRNB2
(7S,9S)-9-acetyl-7-[(2R,4S,5S,6S)-4-amino-5-hydroxy-6-methyloxan-2-yl]oxy-6,9,11-trihydroxy-8,10-dihydro-7H-tetracene-5,12-dione	CC1C(C(CC(O1)OC2CC(CC3=C2C(=C4C(=C3O)C(=O)C5=CC=CC=C5C4=O)O)(C(=O)C)O)N)O		FLT3
[(2S,3S,4S,5R,6S)-4-acetyloxy-6-[5,7-dihydroxy-2-(4-hydroxyphenyl)-4-oxochromen-3-yl]oxy-5-hydroxy-2-methyloxan-3-yl] acetate	CC1C(C(C(C(O1)OC2=C(OC3=CC(=CC(=C3C2=O)O)O)C4=CC=C(C=C4)O)O)OC(=O)C)OC(=O)C		PIM1
[(2S,3S,4S,5R,6S)-4-acetyloxy-6-[5,7-dihydroxy-2-(4-hydroxyphenyl)-4-oxochromen-3-yl]oxy-5-hydroxy-2-methyloxan-3-yl] acetate	CC1C(C(C(C(O1)OC2=C(OC3=CC(=CC(=C3C2=O)O)O)C4=CC=C(C=C4)O)O)OC(=O)C)OC(=O)C		RPS6KA1
[(2S,3S,4S,5R,6S)-4-acetyloxy-6-[5,7-dihydroxy-2-(4-hydroxyphenyl)-4-oxochromen-3-yl]oxy-5-hydroxy-2-methyloxan-3-yl] acetate	CC1C(C(C(C(O1)OC2=C(OC3=CC(=CC(=C3C2=O)O)O)C4=CC=C(C=C4)O)O)OC(=O)C)OC(=O)C		RPS6KA2
[(2R,3R,4S,6S)-3-hydroxy-6-[(2R,3S,4S,6S)-4-hydroxy-6-[(2R,3S,4S,6R)-4-hydroxy-6-[[(3S,5R,8R,9S,10S,13R,14S,17R)-14-hydroxy-10,13-dimethyl-17-(5-oxo-2H-furan-3-yl)-1,2,3,4,5,6,7,8,9,11,12,15,16,17-tetradecahydrocyclopenta[a]phenanthren-3-yl]oxy]-2-methyloxan-3-yl]oxy-2-methyloxan-3-yl]oxy-2-methyloxan-4-yl] acetate	CC1C(C(CC(O1)OC2C(OC(CC2O)OC3C(OC(CC3O)OC4CCC5(C(C4)CCC6C5CCC7(C6(CCC7C8=CC(=O)OC8)O)C)C)C)C)OC(=O)C)O		ATP1A1
[(2R,3R,4S,6S)-3-hydroxy-6-[(2R,3S,4S,6S)-4-hydroxy-6-[(2R,3S,4S,6R)-4-hydroxy-6-[[(3S,5R,8R,9S,10S,13R,14S,17R)-14-hydroxy-10,13-dimethyl-17-(5-oxo-2H-furan-3-yl)-1,2,3,4,5,6,7,8,9,11,12,15,16,17-tetradecahydrocyclopenta[a]phenanthren-3-yl]oxy]-2-methyloxan-3-yl]oxy-2-methyloxan-3-yl]oxy-2-methyloxan-4-yl] acetate	CC1C(C(CC(O1)OC2C(OC(CC2O)OC3C(OC(CC3O)OC4CCC5(C(C4)CCC6C5CCC7(C6(CCC7C8=CC(=O)OC8)O)C)C)C)C)OC(=O)C)O		ATP1A3
[(2R,3R,4S,6S)-3-hydroxy-6-[(2R,3S,4S,6S)-4-hydroxy-6-[(2R,3S,4S,6R)-4-hydroxy-6-[[(3S,5R,8R,9S,10S,13R,14S,17R)-14-hydroxy-10,13-dimethyl-17-(5-oxo-2H-furan-3-yl)-1,2,3,4,5,6,7,8,9,11,12,15,16,17-tetradecahydrocyclopenta[a]phenanthren-3-yl]oxy]-2-methyloxan-3-yl]oxy-2-methyloxan-3-yl]oxy-2-methyloxan-4-yl] acetate	CC1C(C(CC(O1)OC2C(OC(CC2O)OC3C(OC(CC3O)OC4CCC5(C(C4)CCC6C5CCC7(C6(CCC7C8=CC(=O)OC8)O)C)C)C)C)OC(=O)C)O		ATP1B1
[(2R,3R,4S,6S)-3-hydroxy-6-[(2R,3S,4S,6S)-4-hydroxy-6-[(2R,3S,4S,6R)-4-hydroxy-6-[[(3S,5R,8R,9S,10S,13R,14S,17R)-14-hydroxy-10,13-dimethyl-17-(5-oxo-2H-furan-3-yl)-1,2,3,4,5,6,7,8,9,11,12,15,16,17-tetradecahydrocyclopenta[a]phenanthren-3-yl]oxy]-2-methyloxan-3-yl]oxy-2-methyloxan-3-yl]oxy-2-methyloxan-4-yl] acetate	CC1C(C(CC(O1)OC2C(OC(CC2O)OC3C(OC(CC3O)OC4CCC5(C(C4)CCC6C5CCC7(C6(CCC7C8=CC(=O)OC8)O)C)C)C)C)OC(=O)C)O		FXYD2
3-[(3S,5R,8R,9S,10S,13R,14S,17R)-3-[(2R,4S,5S,6R)-5-[(2S,4S,5S,6R)-5-[(2S,4S,5S,6R)-4,5-dihydroxy-6-methyloxan-2-yl]oxy-4-hydroxy-6-methyloxan-2-yl]oxy-4-hydroxy-6-methyloxan-2-yl]oxy-14-hydroxy-10,13-dimethyl-1,2,3,4,5,6,7,8,9,11,12,15,16,17-tetradecahydrocyclopenta[a]phenanthren-17-yl]-2H-furan-5-one	CC1C(C(CC(O1)OC2C(OC(CC2O)OC3C(OC(CC3O)OC4CCC5(C(C4)CCC6C5CCC7(C6(CCC7C8=CC(=O)OC8)O)C)C)C)C)O)O		ATP1A1
3-[(3S,5R,8R,9S,10S,13R,14S,17R)-3-[(2R,4S,5S,6R)-5-[(2S,4S,5S,6R)-5-[(2S,4S,5S,6R)-4,5-dihydroxy-6-methyloxan-2-yl]oxy-4-hydroxy-6-methyloxan-2-yl]oxy-4-hydroxy-6-methyloxan-2-yl]oxy-14-hydroxy-10,13-dimethyl-1,2,3,4,5,6,7,8,9,11,12,15,16,17-tetradecahydrocyclopenta[a]phenanthren-17-yl]-2H-furan-5-one	CC1C(C(CC(O1)OC2C(OC(CC2O)OC3C(OC(CC3O)OC4CCC5(C(C4)CCC6C5CCC7(C6(CCC7C8=CC(=O)OC8)O)C)C)C)C)O)O		ATP1A3
3-[(3S,5R,8R,9S,10S,13R,14S,17R)-3-[(2R,4S,5S,6R)-5-[(2S,4S,5S,6R)-5-[(2S,4S,5S,6R)-4,5-dihydroxy-6-methyloxan-2-yl]oxy-4-hydroxy-6-methyloxan-2-yl]oxy-4-hydroxy-6-methyloxan-2-yl]oxy-14-hydroxy-10,13-dimethyl-1,2,3,4,5,6,7,8,9,11,12,15,16,17-tetradecahydrocyclopenta[a]phenanthren-17-yl]-2H-furan-5-one	CC1C(C(CC(O1)OC2C(OC(CC2O)OC3C(OC(CC3O)OC4CCC5(C(C4)CCC6C5CCC7(C6(CCC7C8=CC(=O)OC8)O)C)C)C)C)O)O		ATP1B1
3-[(3S,5R,8R,9S,10S,13R,14S,17R)-3-[(2R,4S,5S,6R)-5-[(2S,4S,5S,6R)-5-[(2S,4S,5S,6R)-4,5-dihydroxy-6-methyloxan-2-yl]oxy-4-hydroxy-6-methyloxan-2-yl]oxy-4-hydroxy-6-methyloxan-2-yl]oxy-14-hydroxy-10,13-dimethyl-1,2,3,4,5,6,7,8,9,11,12,15,16,17-tetradecahydrocyclopenta[a]phenanthren-17-yl]-2H-furan-5-one	CC1C(C(CC(O1)OC2C(OC(CC2O)OC3C(OC(CC3O)OC4CCC5(C(C4)CCC6C5CCC7(C6(CCC7C8=CC(=O)OC8)O)C)C)C)C)O)O		FXYD2
3-[(3S,5R,8R,9S,10S,12R,13S,14S,17R)-3-[(2R,4S,5S,6R)-5-[(2S,4S,5S,6R)-5-[(2S,4S,5S,6R)-4,5-dihydroxy-6-methyloxan-2-yl]oxy-4-hydroxy-6-methyloxan-2-yl]oxy-4-hydroxy-6-methyloxan-2-yl]oxy-12,14-dihydroxy-10,13-dimethyl-1,2,3,4,5,6,7,8,9,11,12,15,16,17-tetradecahydrocyclopenta[a]phenanthren-17-yl]-2H-furan-5-one	CC1C(C(CC(O1)OC2C(OC(CC2O)OC3C(OC(CC3O)OC4CCC5(C(C4)CCC6C5CC(C7(C6(CCC7C8=CC(=O)OC8)O)C)O)C)C)C)O)O		ATP1A1
3-[(3S,5R,8R,9S,10S,12R,13S,14S,17R)-3-[(2R,4S,5S,6R)-5-[(2S,4S,5S,6R)-5-[(2S,4S,5S,6R)-4,5-dihydroxy-6-methyloxan-2-yl]oxy-4-hydroxy-6-methyloxan-2-yl]oxy-4-hydroxy-6-methyloxan-2-yl]oxy-12,14-dihydroxy-10,13-dimethyl-1,2,3,4,5,6,7,8,9,11,12,15,16,17-tetradecahydrocyclopenta[a]phenanthren-17-yl]-2H-furan-5-one	CC1C(C(CC(O1)OC2C(OC(CC2O)OC3C(OC(CC3O)OC4CCC5(C(C4)CCC6C5CC(C7(C6(CCC7C8=CC(=O)OC8)O)C)O)C)C)C)O)O		ATP1A3
3-[(3S,5R,8R,9S,10S,12R,13S,14S,17R)-3-[(2R,4S,5S,6R)-5-[(2S,4S,5S,6R)-5-[(2S,4S,5S,6R)-4,5-dihydroxy-6-methyloxan-2-yl]oxy-4-hydroxy-6-methyloxan-2-yl]oxy-4-hydroxy-6-methyloxan-2-yl]oxy-12,14-dihydroxy-10,13-dimethyl-1,2,3,4,5,6,7,8,9,11,12,15,16,17-tetradecahydrocyclopenta[a]phenanthren-17-yl]-2H-furan-5-one	CC1C(C(CC(O1)OC2C(OC(CC2O)OC3C(OC(CC3O)OC4CCC5(C(C4)CCC6C5CC(C7(C6(CCC7C8=CC(=O)OC8)O)C)O)C)C)C)O)O		ATP1B1
3-[(3S,5R,8R,9S,10S,12R,13S,14S,17R)-3-[(2R,4S,5S,6R)-5-[(2S,4S,5S,6R)-5-[(2S,4S,5S,6R)-4,5-dihydroxy-6-methyloxan-2-yl]oxy-4-hydroxy-6-methyloxan-2-yl]oxy-4-hydroxy-6-methyloxan-2-yl]oxy-12,14-dihydroxy-10,13-dimethyl-1,2,3,4,5,6,7,8,9,11,12,15,16,17-tetradecahydrocyclopenta[a]phenanthren-17-yl]-2H-furan-5-one	CC1C(C(CC(O1)OC2C(OC(CC2O)OC3C(OC(CC3O)OC4CCC5(C(C4)CCC6C5CC(C7(C6(CCC7C8=CC(=O)OC8)O)C)O)C)C)C)O)O		FXYD2
6-methyl-5-(2-methylpyrazol-3-yl)-N-[(5-methylsulfonylpyridin-2-yl)methyl]-2-oxo-1-[3-(trifluoromethyl)phenyl]pyridine-3-carboxamide	CC1=C(C=C(C(=O)N1C2=CC=CC(=C2)C(F)(F)F)C(=O)NCC3=NC=C(C=C3)S(=O)(=O)C)C4=CC=NN4C		ELANE
N-[3-fluoro-4-[1-methyl-6-(1H-pyrazol-4-yl)indazol-5-yl]oxyphenyl]-1-(4-fluorophenyl)-6-methyl-2-oxopyridine-3-carboxamide	CC1=CC=C(C(=O)N1C2=CC=C(C=C2)F)C(=O)NC3=CC(=C(C=C3)OC4=C(C=C5C(=C4)C=NN5C)C6=CNN=C6)F		MET
(3S)-N-[(3S,5S,6R)-6-methyl-2-oxo-5-phenyl-1-(2,2,2-trifluoroethyl)piperidin-3-yl]-2-oxospiro[1H-pyrrolo[2,3-b]pyridine-3,6'-5,7-dihydrocyclopenta[b]pyridine]-3'-carboxamide	CC1C(CC(C(=O)N1CC(F)(F)F)NC(=O)C2=CC3=C(CC4(C3)C5=C(NC4=O)N=CC=C5)N=C2)C6=CC=CC=C6		CALCRL
(3S)-N-[(3S,5S,6R)-6-methyl-2-oxo-1-(2,2,2-trifluoroethyl)-5-(2,3,6-trifluorophenyl)piperidin-3-yl]-2-oxospiro[1H-pyrrolo[2,3-b]pyridine-3,6'-5,7-dihydrocyclopenta[b]pyridine]-3'-carboxamide	CC1C(CC(C(=O)N1CC(F)(F)F)NC(=O)C2=CC3=C(CC4(C3)C5=C(NC4=O)N=CC=C5)N=C2)C6=C(C=CC(=C6F)F)F		CALCRL
6-[(2R,5R)-2-methyl-5-[(1R)-2,2,2-trifluoro-1-hydroxyethyl]pyrrolidin-1-yl]-4-(trifluoromethyl)-1H-quinolin-2-one	CC1CCC(N1C2=CC3=C(C=C2)NC(=O)C=C3C(F)(F)F)C(C(F)(F)F)O		AR
2-[(2R)-2-methylpyrrolidin-2-yl]-1H-benzimidazole-4-carboxamide	CC1(CCCN1)C2=NC3=C(C=CC=C3N2)C(=O)N		PARP3
(2S)-1-[4-[(5-cyclopropyl-1H-pyrazol-3-yl)amino]pyrrolo[2,1-f][1,2,4]triazin-2-yl]-N-(6-fluoropyridin-3-yl)-2-methylpyrrolidine-2-carboxamide	CC1(CCCN1C2=NN3C=CC=C3C(=N2)NC4=NNC(=C4)C5CC5)C(=O)NC6=CN=C(C=C6)F		IGF1R
(2S)-1-[4-[(5-cyclopropyl-1H-pyrazol-3-yl)amino]pyrrolo[2,1-f][1,2,4]triazin-2-yl]-N-(6-fluoropyridin-3-yl)-2-methylpyrrolidine-2-carboxamide	CC1(CCCN1C2=NN3C=CC=C3C(=N2)NC4=NNC(=C4)C5CC5)C(=O)NC6=CN=C(C=C6)F		INSR
(3Z)-3-[(3,5-dimethyl-1H-pyrrol-2-yl)methylidene]-1H-indol-2-one	CC1=CC(=C(N1)C=C2C3=CC=CC=C3NC2=O)C		FLT1
(3Z)-3-[(3,5-dimethyl-1H-pyrrol-2-yl)methylidene]-1H-indol-2-one	CC1=CC(=C(N1)C=C2C3=CC=CC=C3NC2=O)C		FLT4
(3Z)-3-[(3,5-dimethyl-1H-pyrrol-2-yl)methylidene]-1H-indol-2-one	CC1=CC(=C(N1)C=C2C3=CC=CC=C3NC2=O)C		KDR
(3Z)-3-[(3,5-dimethyl-1H-pyrrol-2-yl)methylidene]-1H-indol-2-one	CC1=CC(=C(N1)C=C2C3=CC=CC=C3NC2=O)C		KIT
(2Z)-2-[(5Z)-5-[(3,5-dimethyl-1H-pyrrol-2-yl)methylidene]-4-methoxypyrrol-2-ylidene]indole	CC1=CC(=C(N1)C=C2C(=CC(=C3C=C4C=CC=CC4=N3)N2)OC)C		BCL2
N-[(2R,3R)-1-benzyl-2-methylpyrrolidin-3-yl]-5-chloro-2-methoxy-4-(methylamino)benzamide	CC1C(CCN1CC2=CC=CC=C2)NC(=O)C3=CC(=C(C=C3OC)NC)Cl		MET
(1S,12bS)-1-(methoxymethyl)-1-methyl-2,3,4,6,7,12b-hexahydro-[1]benzofuro[2,3-a]quinolizine	CC1(CCCN2C1C3=C(CC2)C4=CC=CC=C4O3)COC		ADRA2C
2-[5-methyl-6-(2-methylpyridin-4-yl)pyridin-3-yl]-N-(5-pyrazin-2-ylpyridin-2-yl)acetamide	CC1=CC(=CN=C1C2=CC(=NC=C2)C)CC(=O)NC3=NC=C(C=C3)C4=NC=CN=C4		PORCN
13-chloro-2-[1-[(5-methylpyridin-3-yl)methyl]piperidin-4-ylidene]-4-azatricyclo[9.4.0.03,8]pentadeca-1(11),3(8),4,6,12,14-hexaene	CC1=CC(=CN=C1)CN2CCC(=C3C4=C(CCC5=C3N=CC=C5)C=C(C=C4)Cl)CC2		HRH1
13-chloro-2-[1-[(5-methylpyridin-3-yl)methyl]piperidin-4-ylidene]-4-azatricyclo[9.4.0.03,8]pentadeca-1(11),3(8),4,6,12,14-hexaene	CC1=CC(=CN=C1)CN2CCC(=C3C4=C(CCC5=C3N=CC=C5)C=C(C=C4)Cl)CC2		PTAFR
N-[(3R)-1-[(6-fluoronaphthalen-2-yl)methyl]pyrrolidin-3-yl]-2-[1-(3-hydroxy-5-methylpyridine-2-carbonyl)piperidin-4-ylidene]acetamide	CC1=CC(=C(N=C1)C(=O)N2CCC(=CC(=O)NC3CCN(C3)CC4=CC5=C(C=C4)C=C(C=C5)F)CC2)O		PIK3CA
N-[3-[(1S)-1-[[6-(3,4-dimethoxyphenyl)pyrazin-2-yl]amino]ethyl]phenyl]-5-methylpyridine-3-carboxamide	CC1=CC(=CN=C1)C(=O)NC2=CC=CC(=C2)C(C)NC3=NC(=CN=C3)C4=CC(=C(C=C4)OC)OC		CSF1R
N-[3-[(1S)-1-[[6-(3,4-dimethoxyphenyl)pyrazin-2-yl]amino]ethyl]phenyl]-5-methylpyridine-3-carboxamide	CC1=CC(=CN=C1)C(=O)NC2=CC=CC(=C2)C(C)NC3=NC(=CN=C3)C4=CC(=C(C=C4)OC)OC		KIT
N-[3-[(1S)-1-[[6-(3,4-dimethoxyphenyl)pyrazin-2-yl]amino]ethyl]phenyl]-5-methylpyridine-3-carboxamide	CC1=CC(=CN=C1)C(=O)NC2=CC=CC(=C2)C(C)NC3=NC(=CN=C3)C4=CC(=C(C=C4)OC)OC		PDGFRA
N-[3-[(1S)-1-[[6-(3,4-dimethoxyphenyl)pyrazin-2-yl]amino]ethyl]phenyl]-5-methylpyridine-3-carboxamide	CC1=CC(=CN=C1)C(=O)NC2=CC=CC(=C2)C(C)NC3=NC(=CN=C3)C4=CC(=C(C=C4)OC)OC		PDGFRB
2-[[4-(3-methoxypropoxy)-3-methylpyridin-2-yl]methylsulfinyl]-1H-benzimidazole	CC1=C(C=CN=C1CS(=O)C2=NC3=CC=CC=C3N2)OCCCOC		FGFR1
2-[[4-(3-methoxypropoxy)-3-methylpyridin-2-yl]methylsulfinyl]-1H-benzimidazole	CC1=C(C=CN=C1CS(=O)C2=NC3=CC=CC=C3N2)OCCCOC		FGFR2
2-[[4-(3-methoxypropoxy)-3-methylpyridin-2-yl]methylsulfinyl]-1H-benzimidazole	CC1=C(C=CN=C1CS(=O)C2=NC3=CC=CC=C3N2)OCCCOC		FGFR3
2-[[4-(3-methoxypropoxy)-3-methylpyridin-2-yl]methylsulfinyl]-1H-benzimidazole	CC1=C(C=CN=C1CS(=O)C2=NC3=CC=CC=C3N2)OCCCOC		FLT1
2-[[4-(3-methoxypropoxy)-3-methylpyridin-2-yl]methylsulfinyl]-1H-benzimidazole	CC1=C(C=CN=C1CS(=O)C2=NC3=CC=CC=C3N2)OCCCOC		FLT4
2-[[4-(3-methoxypropoxy)-3-methylpyridin-2-yl]methylsulfinyl]-1H-benzimidazole	CC1=C(C=CN=C1CS(=O)C2=NC3=CC=CC=C3N2)OCCCOC		KDR
2-(2-fluoro-4-iodoanilino)-N-(2-hydroxyethoxy)-1,5-dimethyl-6-oxopyridine-3-carboxamide	CC1=CC(=C(N(C1=O)C)NC2=C(C=C(C=C2)I)F)C(=O)NOCCO		MAP2K1
2-(2-fluoro-4-iodoanilino)-N-(2-hydroxyethoxy)-1,5-dimethyl-6-oxopyridine-3-carboxamide	CC1=CC(=C(N(C1=O)C)NC2=C(C=C(C=C2)I)F)C(=O)NOCCO		MAP2K2
7-(5-methylfuran-2-yl)-3-[[6-[[(3S)-oxolan-3-yl]oxymethyl]pyridin-2-yl]methyl]triazolo[4,5-d]pyrimidin-5-amine	CC1=CC=C(O1)C2=C3C(=NC(=N2)N)N(N=N3)CC4=NC(=CC=C4)COC5CCOC5		ADORA2A
1-[(2R,3R,4S,5R)-3,4-dihydroxy-5-methyloxolan-2-yl]-5-fluoropyrimidine-2,4-dione	CC1C(C(C(O1)N2C=C(C(=O)NC2=O)F)O)O		TYMS
4-[(2R)-2-[(1S,3S,5S)-3,5-dimethyl-2-oxocyclohexyl]-2-hydroxyethyl]piperidine-2,6-dione	CC1CC(C(=O)C(C1)C(CC2CC(=O)NC(=O)C2)O)C		RPL10
4-[(2R)-2-[(1S,3S,5S)-3,5-dimethyl-2-oxocyclohexyl]-2-hydroxyethyl]piperidine-2,6-dione	CC1CC(C(=O)C(C1)C(CC2CC(=O)NC(=O)C2)O)C		RPL22
4-[(2R)-2-[(1S,3S,5S)-3,5-dimethyl-2-oxocyclohexyl]-2-hydroxyethyl]piperidine-2,6-dione	CC1CC(C(=O)C(C1)C(CC2CC(=O)NC(=O)C2)O)C		RPL5
4-[(2R)-2-[(1S,3S,5S)-3,5-dimethyl-2-oxocyclohexyl]-2-hydroxyethyl]piperidine-2,6-dione	CC1CC(C(=O)C(C1)C(CC2CC(=O)NC(=O)C2)O)C		RPS4Y1
N-(benzenesulfonyl)-6-[3-fluoro-5-(2-methylpropoxy)phenyl]-2-[(4S)-2,2,4-trimethylpyrrolidin-1-yl]pyridine-3-carboxamide	CC1CC(N(C1)C2=C(C=CC(=N2)C3=CC(=CC(=C3)F)OCC(C)C)C(=O)NS(=O)(=O)C4=CC=CC=C4)(C)C		CFTR
N-(benzenesulfonyl)-6-[3-[2-[1-(trifluoromethyl)cyclopropyl]ethoxy]pyrazol-1-yl]-2-[(4S)-2,2,4-trimethylpyrrolidin-1-yl]pyridine-3-carboxamide	CC1CC(N(C1)C2=C(C=CC(=N2)N3C=CC(=N3)OCCC4(CC4)C(F)(F)F)C(=O)NS(=O)(=O)C5=CC=CC=C5)(C)C		CFTR
N-(1,3-dimethylpyrazol-4-yl)sulfonyl-6-[3-(3,3,3-trifluoro-2,2-dimethylpropoxy)pyrazol-1-yl]-2-[(4S)-2,2,4-trimethylpyrrolidin-1-yl]pyridine-3-carboxamide	CC1CC(N(C1)C2=C(C=CC(=N2)N3C=CC(=N3)OCC(C)(C)C(F)(F)F)C(=O)NS(=O)(=O)C4=CN(N=C4C)C)(C)C		CFTR
(2S)-N-[3-[(4-carbamimidoylbenzoyl)amino]propyl]-1-[2,4-dichloro-3-[(2,4-dimethylquinolin-8-yl)oxymethyl]phenyl]sulfonylpyrrolidine-2-carboxamide	CC1=CC(=NC2=C1C=CC=C2OCC3=C(C=CC(=C3Cl)S(=O)(=O)N4CCCC4C(=O)NCCCNC(=O)C5=CC=C(C=C5)C(=N)N)Cl)C		BDKRB2
6-(3,3-dimethyl-2-methylideneindol-1-yl)hexanoic acid	CC1(C(=C)N(C2=CC=CC=C21)CCCCCC(=O)O)C		EGFR
(4R)-4-[(1R)-1-fluoroethyl]-3-[2-[[(1S)-1-[4-methyl-5-[2-(trifluoromethyl)pyridin-4-yl]pyridin-2-yl]ethyl]amino]pyrimidin-4-yl]-1,3-oxazolidin-2-one	CC1=CC(=NC=C1C2=CC(=NC=C2)C(F)(F)F)C(C)NC3=NC=CC(=N3)N4C(COC4=O)C(C)F		IDH1
4-hydroxy-N-(4-methoxy-7-morpholin-4-yl-1,3-benzothiazol-2-yl)-4-methylpiperidine-1-carboxamide	CC1(CCN(CC1)C(=O)NC2=NC3=C(C=CC(=C3S2)N4CCOCC4)OC)O		ADORA2A
3-[(3R,4R)-4-methyl-3-[methyl(7H-pyrrolo[2,3-d]pyrimidin-4-yl)amino]piperidin-1-yl]-3-oxopropanenitrile	CC1CCN(CC1N(C)C2=NC=NC3=C2C=CN3)C(=O)CC#N		JAK1
3-[(3R,4R)-4-methyl-3-[methyl(7H-pyrrolo[2,3-d]pyrimidin-4-yl)amino]piperidin-1-yl]-3-oxopropanenitrile	CC1CCN(CC1N(C)C2=NC=NC3=C2C=CN3)C(=O)CC#N		JAK2
3-[(3R,4R)-4-methyl-3-[methyl(7H-pyrrolo[2,3-d]pyrimidin-4-yl)amino]piperidin-1-yl]-3-oxopropanenitrile	CC1CCN(CC1N(C)C2=NC=NC3=C2C=CN3)C(=O)CC#N		JAK3
(2S)-2-(4,6-dimethylpyrimidin-2-yl)oxy-3-methoxy-3,3-diphenylpropanoic acid	CC1=CC(=NC(=N1)OC(C(=O)O)C(C2=CC=CC=C2)(C3=CC=CC=C3)OC)C		EDNRA
(2S)-2-(4,6-dimethylpyrimidin-2-yl)oxy-3-methoxy-3,3-diphenylpropanoic acid	CC1=CC(=NC(=N1)OC(C(=O)O)C(C2=CC=CC=C2)(C3=CC=CC=C3)OC)C		EDNRB
5-fluoro-2-[[(1S)-1-(4-fluorophenyl)ethyl]amino]-6-[(5-methyl-1H-pyrazol-3-yl)amino]pyridine-3-carbonitrile	CC1=CC(=NN1)NC2=C(C=C(C(=N2)NC(C)C3=CC=C(C=C3)F)C#N)F		JAK2
5-fluoro-2-[[(1S)-1-(4-fluorophenyl)ethyl]amino]-6-[(5-methyl-1H-pyrazol-3-yl)amino]pyridine-3-carbonitrile	CC1=CC(=NN1)NC2=C(C=C(C(=N2)NC(C)C3=CC=C(C=C3)F)C#N)F		JAK3
N-[4-[4-(4-methylpiperazin-1-yl)-6-[(5-methyl-1H-pyrazol-3-yl)amino]pyrimidin-2-yl]sulfanylphenyl]cyclopropanecarboxamide	CC1=CC(=NN1)NC2=CC(=NC(=N2)SC3=CC=C(C=C3)NC(=O)C4CC4)N5CCN(CC5)C		ABL2
N-[4-[4-(4-methylpiperazin-1-yl)-6-[(5-methyl-1H-pyrazol-3-yl)amino]pyrimidin-2-yl]sulfanylphenyl]cyclopropanecarboxamide	CC1=CC(=NN1)NC2=CC(=NC(=N2)SC3=CC=C(C=C3)NC(=O)C4CC4)N5CCN(CC5)C		MYLK
N-[4-[4-(4-methylpiperazin-1-yl)-6-[(5-methyl-1H-pyrazol-3-yl)amino]pyrimidin-2-yl]sulfanylphenyl]cyclopropanecarboxamide	CC1=CC(=NN1)NC2=CC(=NC(=N2)SC3=CC=C(C=C3)NC(=O)C4CC4)N5CCN(CC5)C		RET
N-[4-[4-(4-methylpiperazin-1-yl)-6-[(5-methyl-1H-pyrazol-3-yl)amino]pyrimidin-2-yl]sulfanylphenyl]cyclopropanecarboxamide	CC1=CC(=NN1)NC2=CC(=NC(=N2)SC3=CC=C(C=C3)NC(=O)C4CC4)N5CCN(CC5)C		STK11
N-[4-[4-(4-methylpiperazin-1-yl)-6-[(5-methyl-1H-pyrazol-3-yl)amino]pyrimidin-2-yl]sulfanylphenyl]cyclopropanecarboxamide	CC1=CC(=NN1)NC2=CC(=NC(=N2)SC3=CC=C(C=C3)NC(=O)C4CC4)N5CCN(CC5)C		TNK1
3-[(1R,5S)-3-[[7-[(5-methyl-1H-pyrazol-3-yl)amino]-1,6-naphthyridin-5-yl]amino]-8-azabicyclo[3.2.1]octan-8-yl]propanenitrile	CC1=CC(=NN1)NC2=NC(=C3C=CC=NC3=C2)NC4CC5CCC(C4)N5CCC#N		JAK1
3-[(1R,5S)-3-[[7-[(5-methyl-1H-pyrazol-3-yl)amino]-1,6-naphthyridin-5-yl]amino]-8-azabicyclo[3.2.1]octan-8-yl]propanenitrile	CC1=CC(=NN1)NC2=NC(=C3C=CC=NC3=C2)NC4CC5CCC(C4)N5CCC#N		JAK2
3-[(1R,5S)-3-[[7-[(5-methyl-1H-pyrazol-3-yl)amino]-1,6-naphthyridin-5-yl]amino]-8-azabicyclo[3.2.1]octan-8-yl]propanenitrile	CC1=CC(=NN1)NC2=NC(=C3C=CC=NC3=C2)NC4CC5CCC(C4)N5CCC#N		JAK3
(4-fluorophenyl)-[4-[(5-methyl-1H-pyrazol-3-yl)amino]quinazolin-2-yl]methanol	CC1=CC(=NN1)NC2=NC(=NC3=CC=CC=C32)C(C4=CC=C(C=C4)F)O		JAK2
N-[(1S)-1-[6-(4-fluoropyrazol-1-yl)pyridin-3-yl]ethyl]-1-methoxy-4-[4-methyl-6-[(5-methyl-1H-pyrazol-3-yl)amino]pyrimidin-2-yl]cyclohexane-1-carboxamide	CC1=CC(=NN1)NC2=NC(=NC(=C2)C)C3CCC(CC3)(C(=O)NC(C)C4=CN=C(C=C4)N5C=C(C=N5)F)OC		CCDC6
N-[(1S)-1-[6-(4-fluoropyrazol-1-yl)pyridin-3-yl]ethyl]-1-methoxy-4-[4-methyl-6-[(5-methyl-1H-pyrazol-3-yl)amino]pyrimidin-2-yl]cyclohexane-1-carboxamide	CC1=CC(=NN1)NC2=NC(=NC(=C2)C)C3CCC(CC3)(C(=O)NC(C)C4=CN=C(C=C4)N5C=C(C=N5)F)OC		KIF5B
N-[(1S)-1-[6-(4-fluoropyrazol-1-yl)pyridin-3-yl]ethyl]-1-methoxy-4-[4-methyl-6-[(5-methyl-1H-pyrazol-3-yl)amino]pyrimidin-2-yl]cyclohexane-1-carboxamide	CC1=CC(=NN1)NC2=NC(=NC(=C2)C)C3CCC(CC3)(C(=O)NC(C)C4=CN=C(C=C4)N5C=C(C=N5)F)OC		RET
5-chloro-2-N-[(1S)-1-(5-fluoropyrimidin-2-yl)ethyl]-4-N-(5-methyl-1H-pyrazol-3-yl)pyrimidine-2,4-diamine	CC1=CC(=NN1)NC2=NC(=NC=C2Cl)NC(C)C3=NC=C(C=N3)F		JAK1
5-chloro-2-N-[(1S)-1-(5-fluoropyrimidin-2-yl)ethyl]-4-N-(5-methyl-1H-pyrazol-3-yl)pyrimidine-2,4-diamine	CC1=CC(=NN1)NC2=NC(=NC=C2Cl)NC(C)C3=NC=C(C=N3)F		JAK2
3-[(4-chloro-2-fluorophenyl)methyl]-2-methyl-N-(5-methyl-1H-pyrazol-3-yl)-8-(morpholin-4-ylmethyl)imidazo[1,2-b]pyridazin-6-amine	CC1=CC(=NN1)NC2=NN3C(=C(N=C3C(=C2)CN4CCOCC4)C)CC5=C(C=C(C=C5)Cl)F		JAK2
4-methyl-N-(2-morpholin-4-ylethyl)-6-phenylpyridazin-3-amine	CC1=CC(=NN=C1NCCN2CCOCC2)C3=CC=CC=C3		ACHE
4-methyl-N-(2-morpholin-4-ylethyl)-6-phenylpyridazin-3-amine	CC1=CC(=NN=C1NCCN2CCOCC2)C3=CC=CC=C3		DRD2
4-methyl-N-(2-morpholin-4-ylethyl)-6-phenylpyridazin-3-amine	CC1=CC(=NN=C1NCCN2CCOCC2)C3=CC=CC=C3		MAOA
4-(5-methyl-3-phenyl-1,2-oxazol-4-yl)benzenesulfonamide	CC1=C(C(=NO1)C2=CC=CC=C2)C3=CC=C(C=C3)S(=O)(=O)N		PTGS2
4-[(2S)-1-[2-[2-(3-chloro-4-methoxyphenyl)ethyl]-5-(3,5-dimethyl-1,2-oxazol-4-yl)benzimidazol-1-yl]propan-2-yl]morpholine	CC1=C(C(=NO1)C)C2=CC3=C(C=C2)N(C(=N3)CCC4=CC(=C(C=C4)OC)Cl)CC(C)N5CCOCC5		CREBBP
4-[(2S)-1-[2-[2-(3-chloro-4-methoxyphenyl)ethyl]-5-(3,5-dimethyl-1,2-oxazol-4-yl)benzimidazol-1-yl]propan-2-yl]morpholine	CC1=C(C(=NO1)C)C2=CC3=C(C=C2)N(C(=N3)CCC4=CC(=C(C=C4)OC)Cl)CC(C)N5CCOCC5		EP300
4-[(2S)-1-[2-[2-(3-chloro-4-methoxyphenyl)ethyl]-5-(3,5-dimethyl-1,2-oxazol-4-yl)benzimidazol-1-yl]propan-2-yl]morpholine	CC1=C(C(=NO1)C)C2=CC3=C(C=C2)N(C(=N3)CCC4=CC(=C(C=C4)OC)Cl)CC(C)N5CCOCC5		PAG1
4-[(2S)-1-[2-[2-(3-chloro-4-methoxyphenyl)ethyl]-5-(3,5-dimethyl-1,2-oxazol-4-yl)benzimidazol-1-yl]propan-2-yl]morpholine	CC1=C(C(=NO1)C)C2=CC3=C(C=C2)N(C(=N3)CCC4=CC(=C(C=C4)OC)Cl)CC(C)N5CCOCC5		PCBP4
7-(3,5-dimethyl-1,2-oxazol-4-yl)-8-methoxy-1-[(1R)-1-pyridin-2-ylethyl]-3H-imidazo[4,5-c]quinolin-2-one	CC1=C(C(=NO1)C)C2=C(C=C3C(=C2)N=CC4=C3N(C(=O)N4)C(C)C5=CC=CC=N5)OC		BRD3
7-(3,5-dimethyl-1,2-oxazol-4-yl)-8-methoxy-1-[(1R)-1-pyridin-2-ylethyl]-3H-imidazo[4,5-c]quinolin-2-one	CC1=C(C(=NO1)C)C2=C(C=C3C(=C2)N=CC4=C3N(C(=O)N4)C(C)C5=CC=CC=N5)OC		BRD4
N'-benzyl-5-methyl-1,2-oxazole-3-carbohydrazide	CC1=CC(=NO1)C(=O)NNCC2=CC=CC=C2		MAOA
N'-benzyl-5-methyl-1,2-oxazole-3-carbohydrazide	CC1=CC(=NO1)C(=O)NNCC2=CC=CC=C2		MAOB
4-hydroxy-2-methyl-N-(5-methyl-1,2-oxazol-3-yl)-1,1-dioxo-1lambda6,2-benzothiazine-3-carboxamide	CC1=CC(=NO1)NC(=O)C2=C(C3=CC=CC=C3S(=O)(=O)N2C)O		PTGS1
4-hydroxy-2-methyl-N-(5-methyl-1,2-oxazol-3-yl)-1,1-dioxo-1lambda6,2-benzothiazine-3-carboxamide	CC1=CC(=NO1)NC(=O)C2=C(C3=CC=CC=C3S(=O)(=O)N2C)O		PTGS2
1-[2-chloro-4-(6,7-dimethoxyquinolin-4-yl)oxyphenyl]-3-(5-methyl-1,2-oxazol-3-yl)urea	CC1=CC(=NO1)NC(=O)NC2=C(C=C(C=C2)OC3=C4C=C(C(=CC4=NC=C3)OC)OC)Cl		FLT1
1-[2-chloro-4-(6,7-dimethoxyquinolin-4-yl)oxyphenyl]-3-(5-methyl-1,2-oxazol-3-yl)urea	CC1=CC(=NO1)NC(=O)NC2=C(C=C(C=C2)OC3=C4C=C(C(=CC4=NC=C3)OC)OC)Cl		FLT4
1-[2-chloro-4-(6,7-dimethoxyquinolin-4-yl)oxyphenyl]-3-(5-methyl-1,2-oxazol-3-yl)urea	CC1=CC(=NO1)NC(=O)NC2=C(C=C(C=C2)OC3=C4C=C(C(=CC4=NC=C3)OC)OC)Cl		KDR
1-[2-chloro-4-(6,7-dimethoxyquinolin-4-yl)oxyphenyl]-3-(5-methyl-1,2-oxazol-3-yl)urea	CC1=CC(=NO1)NC(=O)NC2=C(C=C(C=C2)OC3=C4C=C(C(=CC4=NC=C3)OC)OC)Cl		KIT
1-[2-chloro-4-(6,7-dimethoxyquinolin-4-yl)oxyphenyl]-3-(5-methyl-1,2-oxazol-3-yl)urea	CC1=CC(=NO1)NC(=O)NC2=C(C=C(C=C2)OC3=C4C=C(C(=CC4=NC=C3)OC)OC)Cl		PDGFRB
(2S)-3-(4-hydroxyphenyl)-4-methyl-2-[4-(2-piperidin-1-ylethoxy)phenyl]-2H-chromen-7-ol	CC1=C(C(OC2=C1C=CC(=C2)O)C3=CC=C(C=C3)OCCN4CCCCC4)C5=CC=C(C=C5)O		ESR1
2-[(3R,6E,10E)-3-hydroxy-3,7,11,15-tetramethylhexadeca-6,10,14-trienyl]-3,5,6-trimethylcyclohexa-2,5-diene-1,4-dione	CC1=C(C(=O)C(=C(C1=O)C)CCC(C)(CCC=C(C)CCC=C(C)CCC=C(C)C)O)C		NQO1
3-[2-[4-(6-fluoro-1,2-benzoxazol-3-yl)piperidin-1-yl]ethyl]-2-methyl-6,7,8,9-tetrahydropyrido[1,2-a]pyrimidin-4-one	CC1=C(C(=O)N2CCCCC2=N1)CCN3CCC(CC3)C4=NOC5=C4C=CC(=C5)F		DRD2
3-[2-[4-(6-fluoro-1,2-benzoxazol-3-yl)piperidin-1-yl]ethyl]-9-hydroxy-2-methyl-6,7,8,9-tetrahydropyrido[1,2-a]pyrimidin-4-one	CC1=C(C(=O)N2CCCC(C2=N1)O)CCN3CCC(CC3)C4=NOC5=C4C=CC(=C5)F		DRD2
1,3-dimethyl-3-phenylpyrrolidine-2,5-dione	CC1(CC(=O)N(C1=O)C)C2=CC=CC=C2		CACNA1H
1-[(5-methoxy-2-thiophen-2-ylquinazolin-4-yl)amino]-3-methylpyrrole-2,5-dione	CC1=CC(=O)N(C1=O)NC2=NC(=NC3=C2C(=CC=C3)OC)C4=CC=CS4		FLT3
1-[(5-methoxy-2-thiophen-2-ylquinazolin-4-yl)amino]-3-methylpyrrole-2,5-dione	CC1=CC(=O)N(C1=O)NC2=NC(=NC3=C2C(=CC=C3)OC)C4=CC=CS4		IKBKB
(4R)-4-methyl-6-[1-methyl-3-(1-methylpyrazol-4-yl)indazol-5-yl]-1,3,4,5-tetrahydro-1,5-benzodiazepin-2-one	CC1CC(=O)NC2=CC=CC(=C2N1)C3=CC4=C(C=C3)N(N=C4C5=CN(N=C5)C)C		EP300
6-acetyl-8-cyclopentyl-5-methyl-2-[(5-piperazin-1-ylpyridin-2-yl)amino]pyrido[2,3-d]pyrimidin-7-one	CC1=C(C(=O)N(C2=NC(=NC=C12)NC3=NC=C(C=C3)N4CCNCC4)C5CCCC5)C(=O)C		CCND1
6-acetyl-8-cyclopentyl-5-methyl-2-[(5-piperazin-1-ylpyridin-2-yl)amino]pyrido[2,3-d]pyrimidin-7-one	CC1=C(C(=O)N(C2=NC(=NC=C12)NC3=NC=C(C=C3)N4CCNCC4)C5CCCC5)C(=O)C		CDK4
6-acetyl-8-cyclopentyl-5-methyl-2-[(5-piperazin-1-ylpyridin-2-yl)amino]pyrido[2,3-d]pyrimidin-7-one	CC1=C(C(=O)N(C2=NC(=NC=C12)NC3=NC=C(C=C3)N4CCNCC4)C5CCCC5)C(=O)C		CDK6
(4S,7S,13S)-13-[[(2S)-2-amino-3-(4-hydroxyphenyl)propanoyl]amino]-7-benzyl-3,3,14,14-tetramethyl-6,9,12-trioxo-1,2-dithia-5,8,11-triazacyclotetradecane-4-carboxylic acid	CC1(C(C(=O)NCC(=O)NC(C(=O)NC(C(SS1)(C)C)C(=O)O)CC2=CC=CC=C2)NC(=O)C(CC3=CC=C(C=C3)O)N)C		EGFR
5-[2-hydroxy-3-[[5-methyl-3-oxo-2-(5,6,7,8-tetrahydronaphthalen-2-yl)-1H-pyrazol-4-yl]diazenyl]phenyl]furan-2-carboxylic acid	CC1=C(C(=O)N(N1)C2=CC3=C(CCCC3)C=C2)N=NC4=CC=CC(=C4O)C5=CC=C(O5)C(=O)O		MPL
1,5-dimethyl-2-phenylpyrazol-3-one	CC1=CC(=O)N(N1C)C2=CC=CC=C2		PTGS1
N-[3-fluoro-4-[7-(2-hydroxy-2-methylpropoxy)quinolin-4-yl]oxyphenyl]-1,5-dimethyl-3-oxo-2-phenylpyrazole-4-carboxamide	CC1=C(C(=O)N(N1C)C2=CC=CC=C2)C(=O)NC3=CC(=C(C=C3)OC4=C5C=CC(=CC5=NC=C4)OCC(C)(C)O)F		AXL
N-[3-fluoro-4-[7-(2-hydroxy-2-methylpropoxy)quinolin-4-yl]oxyphenyl]-1,5-dimethyl-3-oxo-2-phenylpyrazole-4-carboxamide	CC1=C(C(=O)N(N1C)C2=CC=CC=C2)C(=O)NC3=CC(=C(C=C3)OC4=C5C=CC(=CC5=NC=C4)OCC(C)(C)O)F		FLT3
N-[3-fluoro-4-[7-(2-hydroxy-2-methylpropoxy)quinolin-4-yl]oxyphenyl]-1,5-dimethyl-3-oxo-2-phenylpyrazole-4-carboxamide	CC1=C(C(=O)N(N1C)C2=CC=CC=C2)C(=O)NC3=CC(=C(C=C3)OC4=C5C=CC(=CC5=NC=C4)OCC(C)(C)O)F		KDR
N-[3-fluoro-4-[7-(2-hydroxy-2-methylpropoxy)quinolin-4-yl]oxyphenyl]-1,5-dimethyl-3-oxo-2-phenylpyrazole-4-carboxamide	CC1=C(C(=O)N(N1C)C2=CC=CC=C2)C(=O)NC3=CC(=C(C=C3)OC4=C5C=CC(=CC5=NC=C4)OCC(C)(C)O)F		MERTK
N-[3-fluoro-4-[7-(2-hydroxy-2-methylpropoxy)quinolin-4-yl]oxyphenyl]-1,5-dimethyl-3-oxo-2-phenylpyrazole-4-carboxamide	CC1=C(C(=O)N(N1C)C2=CC=CC=C2)C(=O)NC3=CC(=C(C=C3)OC4=C5C=CC(=CC5=NC=C4)OCC(C)(C)O)F		MET
2-[[4-[(4R)-4-methyl-6-oxo-4,5-dihydro-1H-pyridazin-3-yl]phenyl]hydrazinylidene]propanedinitrile	CC1CC(=O)NN=C1C2=CC=C(C=C2)NN=C(C#N)C#N		PDE3A
2-[[4-[(4R)-4-methyl-6-oxo-4,5-dihydro-1H-pyridazin-3-yl]phenyl]hydrazinylidene]propanedinitrile	CC1CC(=O)NN=C1C2=CC=C(C=C2)NN=C(C#N)C#N		PDE3B
2-[[4-[(4R)-4-methyl-6-oxo-4,5-dihydro-1H-pyridazin-3-yl]phenyl]hydrazinylidene]propanedinitrile	CC1CC(=O)NN=C1C2=CC=C(C=C2)NN=C(C#N)C#N		TNNC1
2-[[4-[(4R)-4-methyl-6-oxo-4,5-dihydro-1H-pyridazin-3-yl]phenyl]hydrazinylidene]propanedinitrile	CC1CC(=O)NN=C1C2=CC=C(C=C2)NN=C(C#N)C#N		TNNT2
3-[[3-fluoro-2-(methylsulfamoylamino)pyridin-4-yl]methyl]-4-methyl-7-pyrimidin-2-yloxychromen-2-one	CC1=C(C(=O)OC2=C1C=CC(=C2)OC3=NC=CC=N3)CC4=C(C(=NC=C4)NS(=O)(=O)NC)F		MAP2K1
3-[[3-fluoro-2-(methylsulfamoylamino)pyridin-4-yl]methyl]-4-methyl-7-pyrimidin-2-yloxychromen-2-one	CC1=C(C(=O)OC2=C1C=CC(=C2)OC3=NC=CC=N3)CC4=C(C(=NC=C4)NS(=O)(=O)NC)F		MAP2K2
N-[3-[(4S)-2-amino-4-methyl-1,3-thiazin-4-yl]-4-fluorophenyl]-5-cyanopyridine-2-carboxamide	CC1(C=CSC(=N1)N)C2=C(C=CC(=C2)NC(=O)C3=NC=C(C=C3)C#N)F		BACE1
2-[[(1R)-1-(7-methyl-2-morpholin-4-yl-4-oxopyrido[1,2-a]pyrimidin-9-yl)ethyl]amino]benzoic acid	CC1=CN2C(=O)C=C(N=C2C(=C1)C(C)NC3=CC=CC=C3C(=O)O)N4CCOCC4		PIK3CA
2-[[(1R)-1-(7-methyl-2-morpholin-4-yl-4-oxopyrido[1,2-a]pyrimidin-9-yl)ethyl]amino]benzoic acid	CC1=CN2C(=O)C=C(N=C2C(=C1)C(C)NC3=CC=CC=C3C(=O)O)N4CCOCC4		PIK3CB
2-[[(1R)-1-(7-methyl-2-morpholin-4-yl-4-oxopyrido[1,2-a]pyrimidin-9-yl)ethyl]amino]benzoic acid	CC1=CN2C(=O)C=C(N=C2C(=C1)C(C)NC3=CC=CC=C3C(=O)O)N4CCOCC4		PIK3CD
2-[[(1R)-1-(7-methyl-2-morpholin-4-yl-4-oxopyrido[1,2-a]pyrimidin-9-yl)ethyl]amino]benzoic acid	CC1=CN2C(=O)C=C(N=C2C(=C1)C(C)NC3=CC=CC=C3C(=O)O)N4CCOCC4		PIK3CG
2-[[(1R)-1-(7-methyl-2-morpholin-4-yl-4-oxopyrido[1,2-a]pyrimidin-9-yl)ethyl]amino]benzoic acid	CC1=CN2C(=O)C=C(N=C2C(=C1)C(C)NC3=CC=CC=C3C(=O)O)N4CCOCC4		PIK3R1
2-[[(1R)-1-(7-methyl-2-morpholin-4-yl-4-oxopyrido[1,2-a]pyrimidin-9-yl)ethyl]amino]benzoic acid	CC1=CN2C(=O)C=C(N=C2C(=C1)C(C)NC3=CC=CC=C3C(=O)O)N4CCOCC4		PIK3R3
9-(1-anilinoethyl)-7-methyl-2-morpholin-4-ylpyrido[1,2-a]pyrimidin-4-one	CC1=CN2C(=O)C=C(N=C2C(=C1)C(C)NC3=CC=CC=C3)N4CCOCC4		PIK3CB
3-[(3S,4R)-3-methyl-7-(7H-pyrrolo[2,3-d]pyrimidin-4-yl)-1,7-diazaspiro[3.4]octan-1-yl]-3-oxopropanenitrile	CC1CN(C12CCN(C2)C3=NC=NC4=C3C=CN4)C(=O)CC#N		JAK1
3-[(3S,4R)-3-methyl-7-(7H-pyrrolo[2,3-d]pyrimidin-4-yl)-1,7-diazaspiro[3.4]octan-1-yl]-3-oxopropanenitrile	CC1CN(C12CCN(C2)C3=NC=NC4=C3C=CN4)C(=O)CC#N		JAK2
3-[(3S,4R)-3-methyl-7-(7H-pyrrolo[2,3-d]pyrimidin-4-yl)-1,7-diazaspiro[3.4]octan-1-yl]-3-oxopropanenitrile	CC1CN(C12CCN(C2)C3=NC=NC4=C3C=CN4)C(=O)CC#N		JAK3
N-[5-[4-(3,3-dimethylazetidine-1-carbonyl)phenyl]-[1,2,4]triazolo[1,5-a]pyridin-2-yl]cyclopropanecarboxamide	CC1(CN(C1)C(=O)C2=CC=C(C=C2)C3=CC=CC4=NC(=NN43)NC(=O)C5CC5)C		JAK1
N-(3,3-dimethyl-1,2-dihydroindol-6-yl)-2-(pyridin-4-ylmethylamino)pyridine-3-carboxamide	CC1(CNC2=C1C=CC(=C2)NC(=O)C3=C(N=CC=C3)NCC4=CC=NC=C4)C		FLT1
N-(3,3-dimethyl-1,2-dihydroindol-6-yl)-2-(pyridin-4-ylmethylamino)pyridine-3-carboxamide	CC1(CNC2=C1C=CC(=C2)NC(=O)C3=C(N=CC=C3)NCC4=CC=NC=C4)C		FLT4
N-(3,3-dimethyl-1,2-dihydroindol-6-yl)-2-(pyridin-4-ylmethylamino)pyridine-3-carboxamide	CC1(CNC2=C1C=CC(=C2)NC(=O)C3=C(N=CC=C3)NCC4=CC=NC=C4)C		KDR
N-(3,3-dimethyl-1,2-dihydroindol-6-yl)-2-(pyridin-4-ylmethylamino)pyridine-3-carboxamide	CC1(CNC2=C1C=CC(=C2)NC(=O)C3=C(N=CC=C3)NCC4=CC=NC=C4)C		KIT
N-(3,3-dimethyl-1,2-dihydroindol-6-yl)-2-(pyridin-4-ylmethylamino)pyridine-3-carboxamide	CC1(CNC2=C1C=CC(=C2)NC(=O)C3=C(N=CC=C3)NCC4=CC=NC=C4)C		PDGFRA
N-(3,3-dimethyl-1,2-dihydroindol-6-yl)-2-(pyridin-4-ylmethylamino)pyridine-3-carboxamide	CC1(CNC2=C1C=CC(=C2)NC(=O)C3=C(N=CC=C3)NCC4=CC=NC=C4)C		PDGFRB
N-(3,3-dimethyl-1,2-dihydroindol-6-yl)-2-(pyridin-4-ylmethylamino)pyridine-3-carboxamide	CC1(CNC2=C1C=CC(=C2)NC(=O)C3=C(N=CC=C3)NCC4=CC=NC=C4)C		RET
2-[(Z)-(5-fluoro-2-oxo-1H-indol-3-ylidene)methyl]-5-[(2R)-2-hydroxy-3-morpholin-4-ylpropyl]-3-methyl-1,6,7,8-tetrahydropyrrolo[3,2-c]azepin-4-one	CC1=C(NC2=C1C(=O)N(CCC2)CC(CN3CCOCC3)O)C=C4C5=C(C=CC(=C5)F)NC4=O		KDR
6-[(3S,4S)-4-methyl-1-(pyrimidin-2-ylmethyl)pyrrolidin-3-yl]-3-(oxan-4-yl)-7H-imidazo[1,5-a]pyrazin-8-one	CC1CN(CC1C2=CN3C(=CN=C3C4CCOCC4)C(=O)N2)CC5=NC=CC=N5		PDE9A
6-[(3S,4S)-4-methyl-1-(pyrimidin-2-ylmethyl)pyrrolidin-3-yl]-1-(oxan-4-yl)-5H-pyrazolo[3,4-d]pyrimidin-4-one	CC1CN(CC1C2=NC3=C(C=NN3C4CCOCC4)C(=O)N2)CC5=NC=CC=N5		PDE9A
3-[2,4-dimethyl-5-[(Z)-(2-oxo-1H-indol-3-ylidene)methyl]-1H-pyrrol-3-yl]propanoic acid	CC1=C(NC(=C1CCC(=O)O)C)C=C2C3=CC=CC=C3NC2=O		FGFR1
3-[2,4-dimethyl-5-[(Z)-(2-oxo-1H-indol-3-ylidene)methyl]-1H-pyrrol-3-yl]propanoic acid	CC1=C(NC(=C1CCC(=O)O)C)C=C2C3=CC=CC=C3NC2=O		FGFR2
3-[2,4-dimethyl-5-[(Z)-(2-oxo-1H-indol-3-ylidene)methyl]-1H-pyrrol-3-yl]propanoic acid	CC1=C(NC(=C1CCC(=O)O)C)C=C2C3=CC=CC=C3NC2=O		FGFR3
3-[2,4-dimethyl-5-[(Z)-(2-oxo-1H-indol-3-ylidene)methyl]-1H-pyrrol-3-yl]propanoic acid	CC1=C(NC(=C1CCC(=O)O)C)C=C2C3=CC=CC=C3NC2=O		FGFR4
3-[2,4-dimethyl-5-[(Z)-(2-oxo-1H-indol-3-ylidene)methyl]-1H-pyrrol-3-yl]propanoic acid	CC1=C(NC(=C1CCC(=O)O)C)C=C2C3=CC=CC=C3NC2=O		FLT1
3-[2,4-dimethyl-5-[(Z)-(2-oxo-1H-indol-3-ylidene)methyl]-1H-pyrrol-3-yl]propanoic acid	CC1=C(NC(=C1CCC(=O)O)C)C=C2C3=CC=CC=C3NC2=O		FLT4
3-[2,4-dimethyl-5-[(Z)-(2-oxo-1H-indol-3-ylidene)methyl]-1H-pyrrol-3-yl]propanoic acid	CC1=C(NC(=C1CCC(=O)O)C)C=C2C3=CC=CC=C3NC2=O		KDR
3-[2,4-dimethyl-5-[(Z)-(2-oxo-1H-indol-3-ylidene)methyl]-1H-pyrrol-3-yl]propanoic acid	CC1=C(NC(=C1CCC(=O)O)C)C=C2C3=CC=CC=C3NC2=O		PDGFRA
3-[2,4-dimethyl-5-[(Z)-(2-oxo-1H-indol-3-ylidene)methyl]-1H-pyrrol-3-yl]propanoic acid	CC1=C(NC(=C1CCC(=O)O)C)C=C2C3=CC=CC=C3NC2=O		PDGFRB
(3Z)-5-[(2,6-dichlorophenyl)methylsulfonyl]-3-[[3,5-dimethyl-4-[(2R)-2-(pyrrolidin-1-ylmethyl)pyrrolidine-1-carbonyl]-1H-pyrrol-2-yl]methylidene]-1H-indol-2-one	CC1=C(NC(=C1C(=O)N2CCCC2CN3CCCC3)C)C=C4C5=C(C=CC(=C5)S(=O)(=O)CC6=C(C=CC=C6Cl)Cl)NC4=O		MET
(3Z)-N-(3-chlorophenyl)-3-[[3,5-dimethyl-4-(4-methylpiperazine-1-carbonyl)-1H-pyrrol-2-yl]methylidene]-N-methyl-2-oxo-1H-indole-5-sulfonamide	CC1=C(NC(=C1C(=O)N2CCN(CC2)C)C)C=C3C4=C(C=CC(=C4)S(=O)(=O)N(C)C5=CC(=CC=C5)Cl)NC3=O		MET
N-[(3S)-1-(dimethylcarbamoyl)pyrrolidin-3-yl]-5-[(Z)-(5-fluoro-2-oxo-1H-indol-3-ylidene)methyl]-2,4-dimethyl-1H-pyrrole-3-carboxamide	CC1=C(NC(=C1C(=O)NC2CCN(C2)C(=O)N(C)C)C)C=C3C4=C(C=CC(=C4)F)NC3=O		FLT1
N-[(3S)-1-(dimethylcarbamoyl)pyrrolidin-3-yl]-5-[(Z)-(5-fluoro-2-oxo-1H-indol-3-ylidene)methyl]-2,4-dimethyl-1H-pyrrole-3-carboxamide	CC1=C(NC(=C1C(=O)NC2CCN(C2)C(=O)N(C)C)C)C=C3C4=C(C=CC(=C4)F)NC3=O		FLT3
N-[(3S)-1-(dimethylcarbamoyl)pyrrolidin-3-yl]-5-[(Z)-(5-fluoro-2-oxo-1H-indol-3-ylidene)methyl]-2,4-dimethyl-1H-pyrrole-3-carboxamide	CC1=C(NC(=C1C(=O)NC2CCN(C2)C(=O)N(C)C)C)C=C3C4=C(C=CC(=C4)F)NC3=O		FLT4
N-[(3S)-1-(dimethylcarbamoyl)pyrrolidin-3-yl]-5-[(Z)-(5-fluoro-2-oxo-1H-indol-3-ylidene)methyl]-2,4-dimethyl-1H-pyrrole-3-carboxamide	CC1=C(NC(=C1C(=O)NC2CCN(C2)C(=O)N(C)C)C)C=C3C4=C(C=CC(=C4)F)NC3=O		KDR
N-[(3S)-1-(dimethylcarbamoyl)pyrrolidin-3-yl]-5-[(Z)-(5-fluoro-2-oxo-1H-indol-3-ylidene)methyl]-2,4-dimethyl-1H-pyrrole-3-carboxamide	CC1=C(NC(=C1C(=O)NC2CCN(C2)C(=O)N(C)C)C)C=C3C4=C(C=CC(=C4)F)NC3=O		KIT
N-[(3S)-1-(dimethylcarbamoyl)pyrrolidin-3-yl]-5-[(Z)-(5-fluoro-2-oxo-1H-indol-3-ylidene)methyl]-2,4-dimethyl-1H-pyrrole-3-carboxamide	CC1=C(NC(=C1C(=O)NC2CCN(C2)C(=O)N(C)C)C)C=C3C4=C(C=CC(=C4)F)NC3=O		PDGFRA
N-[(3S)-1-(dimethylcarbamoyl)pyrrolidin-3-yl]-5-[(Z)-(5-fluoro-2-oxo-1H-indol-3-ylidene)methyl]-2,4-dimethyl-1H-pyrrole-3-carboxamide	CC1=C(NC(=C1C(=O)NC2CCN(C2)C(=O)N(C)C)C)C=C3C4=C(C=CC(=C4)F)NC3=O		PDGFRB
5-[(Z)-(5-fluoro-2-oxo-1H-indol-3-ylidene)methyl]-N-[(2S)-2-hydroxy-3-morpholin-4-ylpropyl]-2,4-dimethyl-1H-pyrrole-3-carboxamide	CC1=C(NC(=C1C(=O)NCC(CN2CCOCC2)O)C)C=C3C4=C(C=CC(=C4)F)NC3=O		FLT1
5-[(Z)-(5-fluoro-2-oxo-1H-indol-3-ylidene)methyl]-N-[(2S)-2-hydroxy-3-morpholin-4-ylpropyl]-2,4-dimethyl-1H-pyrrole-3-carboxamide	CC1=C(NC(=C1C(=O)NCC(CN2CCOCC2)O)C)C=C3C4=C(C=CC(=C4)F)NC3=O		FLT3
5-[(Z)-(5-fluoro-2-oxo-1H-indol-3-ylidene)methyl]-N-[(2S)-2-hydroxy-3-morpholin-4-ylpropyl]-2,4-dimethyl-1H-pyrrole-3-carboxamide	CC1=C(NC(=C1C(=O)NCC(CN2CCOCC2)O)C)C=C3C4=C(C=CC(=C4)F)NC3=O		FLT4
5-[(Z)-(5-fluoro-2-oxo-1H-indol-3-ylidene)methyl]-N-[(2S)-2-hydroxy-3-morpholin-4-ylpropyl]-2,4-dimethyl-1H-pyrrole-3-carboxamide	CC1=C(NC(=C1C(=O)NCC(CN2CCOCC2)O)C)C=C3C4=C(C=CC(=C4)F)NC3=O		KDR
5-[(Z)-(5-fluoro-2-oxo-1H-indol-3-ylidene)methyl]-N-[(2S)-2-hydroxy-3-morpholin-4-ylpropyl]-2,4-dimethyl-1H-pyrrole-3-carboxamide	CC1=C(NC(=C1C(=O)NCC(CN2CCOCC2)O)C)C=C3C4=C(C=CC(=C4)F)NC3=O		KIT
5-[(Z)-(5-fluoro-2-oxo-1H-indol-3-ylidene)methyl]-N-[(2S)-2-hydroxy-3-morpholin-4-ylpropyl]-2,4-dimethyl-1H-pyrrole-3-carboxamide	CC1=C(NC(=C1C(=O)NCC(CN2CCOCC2)O)C)C=C3C4=C(C=CC(=C4)F)NC3=O		PDGFRA
5-[(Z)-(5-fluoro-2-oxo-1H-indol-3-ylidene)methyl]-N-[(2S)-2-hydroxy-3-morpholin-4-ylpropyl]-2,4-dimethyl-1H-pyrrole-3-carboxamide	CC1=C(NC(=C1C(=O)NCC(CN2CCOCC2)O)C)C=C3C4=C(C=CC(=C4)F)NC3=O		PDGFRB
7-(2-methoxy-3,5-dimethylpyridin-4-yl)-1-[(3S)-oxolan-3-yl]-5H-pyrazolo[4,3-c]quinolin-4-one	CC1=CN=C(C(=C1C2=CC3=C(C=C2)C4=C(C=NN4C5CCOC5)C(=O)N3)C)OC		PDE9A
3-(4-chlorophenyl)-1-(3-methylpyridin-2-yl)pyrrolidine-2,5-dione	CC1=C(N=CC=C1)N2C(=O)CC(C2=O)C3=CC=C(C=C3)Cl		IL11RA
3-[6-[[1-(2,2-difluoro-1,3-benzodioxol-5-yl)cyclopropanecarbonyl]amino]-3-methylpyridin-2-yl]benzoic acid	CC1=C(N=C(C=C1)NC(=O)C2(CC2)C3=CC4=C(C=C3)OC(O4)(F)F)C5=CC(=CC=C5)C(=O)O		CFTR
6-chloro-9-[(4-methoxy-3,5-dimethylpyridin-2-yl)methyl]purin-2-amine	CC1=CN=C(C(=C1OC)C)CN2C=NC3=C2N=C(N=C3Cl)N		HSP90AA1
6-chloro-9-[(4-methoxy-3,5-dimethylpyridin-2-yl)methyl]purin-2-amine	CC1=CN=C(C(=C1OC)C)CN2C=NC3=C2N=C(N=C3Cl)N		HSP90AB1
N-[6-(2-hydroxyethoxy)-5-(2-methoxyphenoxy)-2-[2-(2H-tetrazol-5-yl)pyridin-4-yl]pyrimidin-4-yl]-5-methylpyridine-2-sulfonamide	CC1=CN=C(C=C1)S(=O)(=O)NC2=C(C(=NC(=N2)C3=CC(=NC=C3)C4=NNN=N4)OCCO)OC5=CC=CC=C5OC		EDNRA
N-[6-methoxy-5-(2-methoxyphenoxy)-2-pyridin-4-ylpyrimidin-4-yl]-5-methylpyridine-2-sulfonamide	CC1=CN=C(C=C1)S(=O)(=O)NC2=C(C(=NC(=N2)C3=CC=NC=C3)OC)OC4=CC=CC=C4OC		EDNRA
10-[3-(hydroxymethyl)-4-[1-methyl-5-[[5-[(2S)-2-methyl-4-(oxetan-3-yl)piperazin-1-yl]pyridin-2-yl]amino]-6-oxopyridin-3-yl]pyridin-2-yl]-4,4-dimethyl-1,10-diazatricyclo[6.4.0.02,6]dodeca-2(6),7-dien-9-one	CC1CN(CCN1C2=CN=C(C=C2)NC3=CC(=CN(C3=O)C)C4=C(C(=NC=C4)N5CCN6C7=C(CC(C7)(C)C)C=C6C5=O)CO)C8COC8		BTK
2-[5-[(2R)-4-(6-benzyl-4,5-dimethylpyridazin-3-yl)-2-methylpiperazin-1-yl]pyrazin-2-yl]propan-2-ol	CC1CN(CCN1C2=NC=C(N=C2)C(C)(C)O)C3=NN=C(C(=C3C)C)CC4=CC=CC=C4		SMO
6-fluoro-7-(2-fluoro-6-hydroxyphenyl)-1-(4-methyl-2-propan-2-ylpyridin-3-yl)-4-[(2S)-2-methyl-4-prop-2-enoylpiperazin-1-yl]pyrido[2,3-d]pyrimidin-2-one	CC1CN(CCN1C2=NC(=O)N(C3=NC(=C(C=C32)F)C4=C(C=CC=C4F)O)C5=C(C=CN=C5C(C)C)C)C(=O)C=C		KRAS
N-[5-[2-(3,5-dimethoxyphenyl)ethyl]-1H-pyrazol-3-yl]-4-[(3R,5S)-3,5-dimethylpiperazin-1-yl]benzamide	CC1CN(CC(N1)C)C2=CC=C(C=C2)C(=O)NC3=NNC(=C3)CCC4=CC(=CC(=C4)OC)OC		AKT1
N-[5-[2-(3,5-dimethoxyphenyl)ethyl]-1H-pyrazol-3-yl]-4-[(3R,5S)-3,5-dimethylpiperazin-1-yl]benzamide	CC1CN(CC(N1)C)C2=CC=C(C=C2)C(=O)NC3=NNC(=C3)CCC4=CC(=CC(=C4)OC)OC		AKT2
N-[5-[2-(3,5-dimethoxyphenyl)ethyl]-1H-pyrazol-3-yl]-4-[(3R,5S)-3,5-dimethylpiperazin-1-yl]benzamide	CC1CN(CC(N1)C)C2=CC=C(C=C2)C(=O)NC3=NNC(=C3)CCC4=CC(=CC(=C4)OC)OC		AKT3
N-[5-[2-(3,5-dimethoxyphenyl)ethyl]-1H-pyrazol-3-yl]-4-[(3R,5S)-3,5-dimethylpiperazin-1-yl]benzamide	CC1CN(CC(N1)C)C2=CC=C(C=C2)C(=O)NC3=NNC(=C3)CCC4=CC(=CC(=C4)OC)OC		FGFR1
N-[5-[2-(3,5-dimethoxyphenyl)ethyl]-1H-pyrazol-3-yl]-4-[(3R,5S)-3,5-dimethylpiperazin-1-yl]benzamide	CC1CN(CC(N1)C)C2=CC=C(C=C2)C(=O)NC3=NNC(=C3)CCC4=CC(=CC(=C4)OC)OC		FGFR2
N-[5-[2-(3,5-dimethoxyphenyl)ethyl]-1H-pyrazol-3-yl]-4-[(3R,5S)-3,5-dimethylpiperazin-1-yl]benzamide	CC1CN(CC(N1)C)C2=CC=C(C=C2)C(=O)NC3=NNC(=C3)CCC4=CC(=CC(=C4)OC)OC		FGFR3
N-[5-[2-(3,5-dimethoxyphenyl)ethyl]-1H-pyrazol-3-yl]-4-[(3R,5S)-3,5-dimethylpiperazin-1-yl]benzamide	CC1CN(CC(N1)C)C2=CC=C(C=C2)C(=O)NC3=NNC(=C3)CCC4=CC(=CC(=C4)OC)OC		FGFR4
6-amino-5-[(1R)-1-(2,6-dichloro-3-fluorophenyl)ethoxy]-N-[4-[(3R,5S)-3,5-dimethylpiperazine-1-carbonyl]phenyl]pyridazine-3-carboxamide	CC1CN(CC(N1)C)C(=O)C2=CC=C(C=C2)NC(=O)C3=NN=C(C(=C3)OC(C)C4=C(C=CC(=C4Cl)F)Cl)N		ALK
(1S,4R,6S,7Z,14S,18R)-N-cyclopropylsulfonyl-14-[(5-methylpyrazine-2-carbonyl)amino]-2,15-dioxo-18-phenanthridin-6-yloxy-3,16-diazatricyclo[14.3.0.04,6]nonadec-7-ene-4-carboxamide	CC1=CN=C(C=N1)C(=O)NC2CCCCCC=CC3CC3(NC(=O)C4CC(CN4C2=O)OC5=NC6=CC=CC=C6C7=CC=CC=C75)C(=O)NS(=O)(=O)C8CC8		KRAS
N-[2-[4-(cyclohexylcarbamoylsulfamoyl)phenyl]ethyl]-5-methylpyrazine-2-carboxamide	CC1=CN=C(C=N1)C(=O)NCCC2=CC=C(C=C2)S(=O)(=O)NC(=O)NC3CCCCC3		KCNJ11
[4-(3-chloro-2-fluoroanilino)-7-methoxyquinazolin-6-yl] (2R)-2,4-dimethylpiperazine-1-carboxylate	CC1CN(CCN1C(=O)OC2=C(C=C3C(=C2)C(=NC=N3)NC4=C(C(=CC=C4)Cl)F)OC)C		EGFR
N-(3-methoxy-5-methylpyrazin-2-yl)-2-[4-(1,3,4-oxadiazol-2-yl)phenyl]pyridine-3-sulfonamide	CC1=CN=C(C(=N1)OC)NS(=O)(=O)C2=C(N=CC=C2)C3=CC=C(C=C3)C4=NN=CO4		EDNRA
N-[6-[(2S,6R)-2,6-dimethylmorpholin-4-yl]pyridin-3-yl]-2-methyl-3-[4-(trifluoromethoxy)phenyl]benzamide	CC1CN(CC(O1)C)C2=NC=C(C=C2)NC(=O)C3=CC=CC(=C3C)C4=CC=C(C=C4)OC(F)(F)F		SMO
2-[(2S,6R)-2,6-dimethylmorpholin-4-yl]-N-[5-(6-morpholin-4-yl-4-oxopyran-2-yl)-9H-thioxanthen-2-yl]acetamide	CC1CN(CC(O1)C)CC(=O)NC2=CC3=C(C=C2)SC4=C(C3)C=CC=C4C5=CC(=O)C=C(O5)N6CCOCC6		ATM
(3S)-N-(6-chloro-9H-pyrido[3,4-b]indol-8-yl)-4-[2-[(2S,6R)-2,6-dimethylmorpholin-4-yl]-2-oxoethyl]-6,6-dimethylmorpholine-3-carboxamide	CC1CN(CC(O1)C)C(=O)CN2CC(OCC2C(=O)NC3=CC(=CC4=C3NC5=C4C=CN=C5)Cl)(C)C		IKBKB
(3S)-N-hydroxy-2,2-dimethyl-4-(4-pyridin-4-yloxyphenyl)sulfonylthiomorpholine-3-carboxamide	CC1(C(N(CCS1)S(=O)(=O)C2=CC=C(C=C2)OC3=CC=NC=C3)C(=O)NO)C		MMP13
(3S)-N-hydroxy-2,2-dimethyl-4-(4-pyridin-4-yloxyphenyl)sulfonylthiomorpholine-3-carboxamide	CC1(C(N(CCS1)S(=O)(=O)C2=CC=C(C=C2)OC3=CC=NC=C3)C(=O)NO)C		MMP14
(3S)-N-hydroxy-2,2-dimethyl-4-(4-pyridin-4-yloxyphenyl)sulfonylthiomorpholine-3-carboxamide	CC1(C(N(CCS1)S(=O)(=O)C2=CC=C(C=C2)OC3=CC=NC=C3)C(=O)NO)C		MMP2
(3S)-N-hydroxy-2,2-dimethyl-4-(4-pyridin-4-yloxyphenyl)sulfonylthiomorpholine-3-carboxamide	CC1(C(N(CCS1)S(=O)(=O)C2=CC=C(C=C2)OC3=CC=NC=C3)C(=O)NO)C		MMP3
(3S)-N-hydroxy-2,2-dimethyl-4-(4-pyridin-4-yloxyphenyl)sulfonylthiomorpholine-3-carboxamide	CC1(C(N(CCS1)S(=O)(=O)C2=CC=C(C=C2)OC3=CC=NC=C3)C(=O)NO)C		MMP9
(3S)-N-hydroxy-4-[4-(4-hydroxybut-2-ynoxy)phenyl]sulfonyl-2,2-dimethylthiomorpholine-3-carboxamide	CC1(C(N(CCS1)S(=O)(=O)C2=CC=C(C=C2)OCC#CCO)C(=O)NO)C		MMP13
4-[2-(2-chloro-4-fluoroanilino)-5-methylpyrimidin-4-yl]-N-[(1S)-1-(3-chlorophenyl)-2-hydroxyethyl]-1H-pyrrole-2-carboxamide	CC1=CN=C(N=C1C2=CNC(=C2)C(=O)NC(CO)C3=CC(=CC=C3)Cl)NC4=C(C=C(C=C4)F)Cl		MAPK1
N-[(1S)-2-amino-1-(3-chloro-5-fluorophenyl)ethyl]-1-[5-methyl-2-(oxan-4-ylamino)pyrimidin-4-yl]imidazole-4-carboxamide	CC1=CN=C(N=C1N2C=C(N=C2)C(=O)NC(CN)C3=CC(=CC(=C3)Cl)F)NC4CCOCC4		MAPK1
N-tert-butyl-3-[[5-methyl-2-[4-(2-pyrrolidin-1-ylethoxy)anilino]pyrimidin-4-yl]amino]benzenesulfonamide	CC1=CN=C(N=C1NC2=CC(=CC=C2)S(=O)(=O)NC(C)(C)C)NC3=CC=C(C=C3)OCCN4CCCC4		FLT3
N-tert-butyl-3-[[5-methyl-2-[4-(2-pyrrolidin-1-ylethoxy)anilino]pyrimidin-4-yl]amino]benzenesulfonamide	CC1=CN=C(N=C1NC2=CC(=CC=C2)S(=O)(=O)NC(C)(C)C)NC3=CC=C(C=C3)OCCN4CCCC4		JAK2
(2S)-2-methoxy-3-[4-[2-(5-methyl-2-phenyl-1,3-oxazol-4-yl)ethoxy]-1-benzothiophen-7-yl]propanoic acid	CC1=C(N=C(O1)C2=CC=CC=C2)CCOC3=C4C=CSC4=C(C=C3)CC(C(=O)O)OC		PPARG
(2S)-2-(2-benzoylanilino)-3-[4-[2-(5-methyl-2-phenyl-1,3-oxazol-4-yl)ethoxy]phenyl]propanoic acid	CC1=C(N=C(O1)C2=CC=CC=C2)CCOC3=CC=C(C=C3)CC(C(=O)O)NC4=CC=CC=C4C(=O)C5=CC=CC=C5		PPARG
2-[(4-methoxyphenoxy)carbonyl-[[4-[2-(5-methyl-2-phenyl-1,3-oxazol-4-yl)ethoxy]phenyl]methyl]amino]acetic acid	CC1=C(N=C(O1)C2=CC=CC=C2)CCOC3=CC=C(C=C3)CN(CC(=O)O)C(=O)OC4=CC=C(C=C4)OC		PPARG
(4E)-4-[[4-[(5-methyl-2-phenyl-1,3-oxazol-4-yl)methoxy]phenyl]methoxyimino]-4-phenylbutanoic acid	CC1=C(N=C(O1)C2=CC=CC=C2)COC3=CC=C(C=C3)CON=C(CCC(=O)O)C4=CC=CC=C4		PPARG
4-methyl-5-(4-methylsulfanylbenzoyl)-1,3-dihydroimidazol-2-one	CC1=C(NC(=O)N1)C(=O)C2=CC=C(C=C2)SC		PDE3A
4-methyl-5-(4-methylsulfanylbenzoyl)-1,3-dihydroimidazol-2-one	CC1=C(NC(=O)N1)C(=O)C2=CC=C(C=C2)SC		PDE3B
1-[(2S,4R,5S)-4-hydroxy-5-(hydroxymethyl)oxolan-2-yl]-5-methylpyrimidine-2,4-dione	CC1=CN(C(=O)NC1=O)C2CC(C(O2)CO)O		OCA2
1-[(2R,3S,4R,5R)-3-fluoro-4-hydroxy-5-(hydroxymethyl)oxolan-2-yl]-5-methylpyrimidine-2,4-dione	CC1=CN(C(=O)NC1=O)C2C(C(C(O2)CO)O)F		OCA2
4-hydroxy-2-methyl-N-(5-methyl-1,3-thiazol-2-yl)-1,1-dioxo-1lambda6,2-benzothiazine-3-carboxamide	CC1=CN=C(S1)NC(=O)C2=C(C3=CC=CC=C3S(=O)(=O)N2C)O		PTGS2
5-(4-chlorophenyl)-1-(2,4-dichlorophenyl)-4-methyl-N-piperidin-1-ylpyrazole-3-carboxamide	CC1=C(N(N=C1C(=O)NN2CCCCC2)C3=C(C=C(C=C3)Cl)Cl)C4=CC=C(C=C4)Cl		CNR1
1-(2,4-dichlorophenyl)-5-(4-(123I)iodanylphenyl)-4-methyl-N-piperidin-1-ylpyrazole-3-carboxamide	CC1=C(N(N=C1C(=O)NN2CCCCC2)C3=C(C=C(C=C3)Cl)Cl)C4=CC=C(C=C4)I		CDK4
1-(2,4-dichlorophenyl)-5-(4-(123I)iodanylphenyl)-4-methyl-N-piperidin-1-ylpyrazole-3-carboxamide	CC1=C(N(N=C1C(=O)NN2CCCCC2)C3=C(C=C(C=C3)Cl)Cl)C4=CC=C(C=C4)I		PCSK9
2-[3-(3,5-dimethyltriazol-4-yl)-5-[(S)-oxan-4-yl(phenyl)methyl]pyrido[3,2-b]indol-7-yl]propan-2-ol	CC1=C(N(N=N1)C)C2=CC3=C(C4=C(N3C(C5CCOCC5)C6=CC=CC=C6)C=C(C=C4)C(C)(C)O)N=C2		BRD3
2-[3-(3,5-dimethyltriazol-4-yl)-5-[(S)-oxan-4-yl(phenyl)methyl]pyrido[3,2-b]indol-7-yl]propan-2-ol	CC1=C(N(N=N1)C)C2=CC3=C(C4=C(N3C(C5CCOCC5)C6=CC=CC=C6)C=C(C=C4)C(C)(C)O)N=C2		BRD4
1-[2-[5-[(3-methyloxetan-3-yl)methoxy]benzimidazol-1-yl]quinolin-8-yl]piperidin-4-amine	CC1(COC1)COC2=CC3=C(C=C2)N(C=N3)C4=NC5=C(C=CC=C5N6CCC(CC6)N)C=C4		ALK
1-[2-[5-[(3-methyloxetan-3-yl)methoxy]benzimidazol-1-yl]quinolin-8-yl]piperidin-4-amine	CC1(COC1)COC2=CC3=C(C=C2)N(C=N3)C4=NC5=C(C=CC=C5N6CCC(CC6)N)C=C4		FLT3
1-[2-[5-[(3-methyloxetan-3-yl)methoxy]benzimidazol-1-yl]quinolin-8-yl]piperidin-4-amine	CC1(COC1)COC2=CC3=C(C=C2)N(C=N3)C4=NC5=C(C=CC=C5N6CCC(CC6)N)C=C4		MET
1-[2-[5-[(3-methyloxetan-3-yl)methoxy]benzimidazol-1-yl]quinolin-8-yl]piperidin-4-amine	CC1(COC1)COC2=CC3=C(C=C2)N(C=N3)C4=NC5=C(C=CC=C5N6CCC(CC6)N)C=C4		PDGFRA
1-[2-[5-[(3-methyloxetan-3-yl)methoxy]benzimidazol-1-yl]quinolin-8-yl]piperidin-4-amine	CC1(COC1)COC2=CC3=C(C=C2)N(C=N3)C4=NC5=C(C=CC=C5N6CCC(CC6)N)C=C4		PDGFRB
(3R)-3-methyl-4-[4-(2-methylpyrazol-3-yl)-8-(1H-pyrazol-5-yl)-1,7-naphthyridin-2-yl]morpholine	CC1COCCN1C2=NC3=C(C=CN=C3C4=CC=NN4)C(=C2)C5=CC=NN5C		ATR
3-[2,4-bis[(3S)-3-methylmorpholin-4-yl]pyrido[2,3-d]pyrimidin-7-yl]-N-methylbenzamide	CC1COCCN1C2=NC(=NC3=C2C=CC(=N3)C4=CC(=CC=C4)C(=O)NC)N5CCOCC5C		MTOR
[5-[2,4-bis[(3S)-3-methylmorpholin-4-yl]pyrido[2,3-d]pyrimidin-7-yl]-2-methoxyphenyl]methanol	CC1COCCN1C2=NC(=NC3=C2C=CC(=N3)C4=CC(=C(C=C4)OC)CO)N5CCOCC5C		MTOR
imino-methyl-[1-[6-[(3R)-3-methylmorpholin-4-yl]-2-(1H-pyrrolo[2,3-b]pyridin-4-yl)pyrimidin-4-yl]cyclopropyl]-oxo-lambda6-sulfane	CC1COCCN1C2=NC(=NC(=C2)C3(CC3)S(=N)(=O)C)C4=C5C=CNC5=NC=C4		ATR
(3R)-4-[2-(1H-indol-4-yl)-6-(1-methylsulfonylcyclopropyl)pyrimidin-4-yl]-3-methylmorpholine	CC1COCCN1C2=NC(=NC(=C2)C3(CC3)S(=O)(=O)C)C4=C5C=CNC5=CC=C4		ATR
4-[3-(3-fluorophenyl)-5,5-dimethyl-4-oxofuran-2-yl]benzenesulfonamide	CC1(C(=O)C(=C(O1)C2=CC=C(C=C2)S(=O)(=O)N)C3=CC(=CC=C3)F)C		CA2
4-[3-(3-fluorophenyl)-5,5-dimethyl-4-oxofuran-2-yl]benzenesulfonamide	CC1(C(=O)C(=C(O1)C2=CC=C(C=C2)S(=O)(=O)N)C3=CC(=CC=C3)F)C		PTGS2
4-N-[3-chloro-4-(1,3-thiazol-2-ylmethoxy)phenyl]-6-N-[(4R)-4-methyl-4,5-dihydro-1,3-oxazol-2-yl]quinazoline-4,6-diamine	CC1COC(=N1)NC2=CC3=C(C=C2)N=CN=C3NC4=CC(=C(C=C4)OCC5=NC=CS5)Cl		EGFR
4-N-[3-chloro-4-(1,3-thiazol-2-ylmethoxy)phenyl]-6-N-[(4R)-4-methyl-4,5-dihydro-1,3-oxazol-2-yl]quinazoline-4,6-diamine	CC1COC(=N1)NC2=CC3=C(C=C2)N=CN=C3NC4=CC(=C(C=C4)OCC5=NC=CS5)Cl		ERBB2
6-[[5-fluoro-2-(3,4,5-trimethoxyanilino)pyrimidin-4-yl]amino]-2,2-dimethyl-4H-pyrido[3,2-b][1,4]oxazin-3-one	CC1(C(=O)NC2=C(O1)C=CC(=N2)NC3=NC(=NC=C3F)NC4=CC(=C(C(=C4)OC)OC)OC)C		SYK
(3R)-4-[2-[4-[1-(3-methoxy-[1,2,4]triazolo[4,3-b]pyridazin-6-yl)piperidin-4-yl]phenoxy]ethyl]-1,3-dimethylpiperazin-2-one	CC1C(=O)N(CCN1CCOC2=CC=C(C=C2)C3CCN(CC3)C4=NN5C(=NN=C5OC)C=C4)C		BRD4
(5S)-5-[[4-(5-chloropyridin-2-yl)oxypiperidin-1-yl]sulfonylmethyl]-5-methylimidazolidine-2,4-dione	CC1(C(=O)NC(=O)N1)CS(=O)(=O)N2CCC(CC2)OC3=NC=C(C=C3)Cl		MMP9
3,5,5-trimethyl-1,3-oxazolidine-2,4-dione	CC1(C(=O)N(C(=O)O1)C)C		CACNA1H
4-[3-[4-cyano-3-(trifluoromethyl)phenyl]-5,5-dimethyl-4-oxo-2-sulfanylideneimidazolidin-1-yl]-2-fluoro-N-methylbenzamide	CC1(C(=O)N(C(=S)N1C2=CC(=C(C=C2)C(=O)NC)F)C3=CC(=C(C=C3)C#N)C(F)(F)F)C		AR
4-[3-[4-[(2S)-2,3-dihydroxypropoxy]phenyl]-4,4-dimethyl-5-oxo-2-sulfanylideneimidazolidin-1-yl]-2-(trifluoromethyl)benzonitrile	CC1(C(=O)N(C(=S)N1C2=CC=C(C=C2)OCC(CO)O)C3=CC(=C(C=C3)C#N)C(F)(F)F)C		AR
4-[4,4-dimethyl-3-[6-[3-(1,3-oxazol-2-yl)propyl]pyridin-3-yl]-5-oxo-2-sulfanylideneimidazolidin-1-yl]-3-fluoro-2-(trifluoromethyl)benzonitrile	CC1(C(=O)N(C(=S)N1C2=CN=C(C=C2)CCCC3=NC=CO3)C4=C(C(=C(C=C4)C#N)C(F)(F)F)F)C		AR
5-chloro-N-(4-methoxy-3-piperazin-1-ylphenyl)-3-methyl-1-benzothiophene-2-sulfonamide	CC1=C(SC2=C1C=C(C=C2)Cl)S(=O)(=O)NC3=CC(=C(C=C3)OC)N4CCNCC4		RARG
2-[(9S)-7-(4-chlorophenyl)-4,5,13-trimethyl-3-thia-1,8,11,12-tetrazatricyclo[8.3.0.02,6]trideca-2(6),4,7,10,12-pentaen-9-yl]-N-(4-hydroxyphenyl)acetamide	CC1=C(SC2=C1C(=NC(C3=NN=C(N32)C)CC(=O)NC4=CC=C(C=C4)O)C5=CC=C(C=C5)Cl)C		BRD3
2-[(9S)-7-(4-chlorophenyl)-4,5,13-trimethyl-3-thia-1,8,11,12-tetrazatricyclo[8.3.0.02,6]trideca-2(6),4,7,10,12-pentaen-9-yl]-N-(4-hydroxyphenyl)acetamide	CC1=C(SC2=C1C(=NC(C3=NN=C(N32)C)CC(=O)NC4=CC=C(C=C4)O)C5=CC=C(C=C5)Cl)C		BRD4
2-[(9S)-7-(4-chlorophenyl)-4,5,13-trimethyl-3-thia-1,8,11,12-tetrazatricyclo[8.3.0.02,6]trideca-2(6),4,7,10,12-pentaen-9-yl]-N-[3-(4-methylpiperazin-1-yl)propyl]acetamide	CC1=C(SC2=C1C(=NC(C3=NN=C(N32)C)CC(=O)NCCCN4CCN(CC4)C)C5=CC=C(C=C5)Cl)C		BRD3
2-[(9S)-7-(4-chlorophenyl)-4,5,13-trimethyl-3-thia-1,8,11,12-tetrazatricyclo[8.3.0.02,6]trideca-2(6),4,7,10,12-pentaen-9-yl]-N-[3-(4-methylpiperazin-1-yl)propyl]acetamide	CC1=C(SC2=C1C(=NC(C3=NN=C(N32)C)CC(=O)NCCCN4CCN(CC4)C)C5=CC=C(C=C5)Cl)C		BRD4
tert-butyl 2-[(9S)-7-(4-chlorophenyl)-4,5,13-trimethyl-3-thia-1,8,11,12-tetrazatricyclo[8.3.0.02,6]trideca-2(6),4,7,10,12-pentaen-9-yl]acetate	CC1=C(SC2=C1C(=NC(C3=NN=C(N32)C)CC(=O)OC(C)(C)C)C4=CC=C(C=C4)Cl)C		BRD3
tert-butyl 2-[(9S)-7-(4-chlorophenyl)-4,5,13-trimethyl-3-thia-1,8,11,12-tetrazatricyclo[8.3.0.02,6]trideca-2(6),4,7,10,12-pentaen-9-yl]acetate	CC1=C(SC2=C1C(=NC(C3=NN=C(N32)C)CC(=O)OC(C)(C)C)C4=CC=C(C=C4)Cl)C		BRD4
5-[6-(3-methoxyoxetan-3-yl)-7-methyl-4-morpholin-4-ylthieno[3,2-d]pyrimidin-2-yl]pyrimidin-2-amine	CC1=C(SC2=C1N=C(N=C2N3CCOCC3)C4=CN=C(N=C4)N)C5(COC5)OC		PIK3CA
(2S)-1-[4-[[2-(2-aminopyrimidin-5-yl)-7-methyl-4-morpholin-4-ylthieno[3,2-d]pyrimidin-6-yl]methyl]piperazin-1-yl]-2-hydroxypropan-1-one	CC1=C(SC2=C1N=C(N=C2N3CCOCC3)C4=CN=C(N=C4)N)CN5CCN(CC5)C(=O)C(C)O		MTOR
(2S)-1-[4-[[2-(2-aminopyrimidin-5-yl)-7-methyl-4-morpholin-4-ylthieno[3,2-d]pyrimidin-6-yl]methyl]piperazin-1-yl]-2-hydroxypropan-1-one	CC1=C(SC2=C1N=C(N=C2N3CCOCC3)C4=CN=C(N=C4)N)CN5CCN(CC5)C(=O)C(C)O		PIK3C2B
(2S)-1-[4-[[2-(2-aminopyrimidin-5-yl)-7-methyl-4-morpholin-4-ylthieno[3,2-d]pyrimidin-6-yl]methyl]piperazin-1-yl]-2-hydroxypropan-1-one	CC1=C(SC2=C1N=C(N=C2N3CCOCC3)C4=CN=C(N=C4)N)CN5CCN(CC5)C(=O)C(C)O		PIK3CA
(2S)-1-[4-[[2-(2-aminopyrimidin-5-yl)-7-methyl-4-morpholin-4-ylthieno[3,2-d]pyrimidin-6-yl]methyl]piperazin-1-yl]-2-hydroxypropan-1-one	CC1=C(SC2=C1N=C(N=C2N3CCOCC3)C4=CN=C(N=C4)N)CN5CCN(CC5)C(=O)C(C)O		PIK3CB
(2S)-1-[4-[[2-(2-aminopyrimidin-5-yl)-7-methyl-4-morpholin-4-ylthieno[3,2-d]pyrimidin-6-yl]methyl]piperazin-1-yl]-2-hydroxypropan-1-one	CC1=C(SC2=C1N=C(N=C2N3CCOCC3)C4=CN=C(N=C4)N)CN5CCN(CC5)C(=O)C(C)O		PIK3CD
(2S)-1-[4-[[2-(2-aminopyrimidin-5-yl)-7-methyl-4-morpholin-4-ylthieno[3,2-d]pyrimidin-6-yl]methyl]piperazin-1-yl]-2-hydroxypropan-1-one	CC1=C(SC2=C1N=C(N=C2N3CCOCC3)C4=CN=C(N=C4)N)CN5CCN(CC5)C(=O)C(C)O		PIK3CG
(2S)-1-[4-[[2-(2-aminopyrimidin-5-yl)-7-methyl-4-morpholin-4-ylthieno[3,2-d]pyrimidin-6-yl]methyl]piperazin-1-yl]-2-hydroxypropan-1-one	CC1=C(SC2=C1N=C(N=C2N3CCOCC3)C4=CN=C(N=C4)N)CN5CCN(CC5)C(=O)C(C)O		PIK3R1
(2S)-1-[4-[[2-(2-aminopyrimidin-5-yl)-7-methyl-4-morpholin-4-ylthieno[3,2-d]pyrimidin-6-yl]methyl]piperazin-1-yl]-2-hydroxypropan-1-one	CC1=C(SC2=C1N=C(N=C2N3CCOCC3)C4=CN=C(N=C4)N)CN5CCN(CC5)C(=O)C(C)O		PIK3R3
6-(3-fluorophenyl)-3-methyl-7-[(1S)-1-(7H-purin-6-ylamino)ethyl]-[1,3]thiazolo[3,2-a]pyrimidin-5-one	CC1=CSC2=NC(=C(C(=O)N12)C3=CC(=CC=C3)F)C(C)NC4=NC=NC5=C4NC=N5		PIK3CD
2-[3-cyano-4-(2-methylpropoxy)phenyl]-4-methyl-1,3-thiazole-5-carboxylic acid	CC1=C(SC(=N1)C2=CC(=C(C=C2)OCC(C)C)C#N)C(=O)O		XDH
5-(2-chloroethyl)-4-methyl-1,3-thiazole	CC1=C(SC=N1)CCCl		GABRA2
5-(2-chloroethyl)-4-methyl-1,3-thiazole	CC1=C(SC=N1)CCCl		GABRA3
5-(2-chloroethyl)-4-methyl-1,3-thiazole	CC1=C(SC=N1)CCCl		GABRB3
5-(2-chloroethyl)-4-methyl-1,3-thiazole	CC1=C(SC=N1)CCCl		GABRE
5-(2-chloroethyl)-4-methyl-1,3-thiazole	CC1=C(SC=N1)CCCl		GABRP
4-methyl-5-[2-(4-morpholin-4-ylanilino)pyrimidin-4-yl]-1,3-thiazol-2-amine	CC1=C(SC(=N1)N)C2=NC(=NC=C2)NC3=CC=C(C=C3)N4CCOCC4		KDR
(2S)-1-N-[4-methyl-5-[2-(1,1,1-trifluoro-2-methylpropan-2-yl)pyridin-4-yl]-1,3-thiazol-2-yl]pyrrolidine-1,2-dicarboxamide	CC1=C(SC(=N1)NC(=O)N2CCCC2C(=O)N)C3=CC(=NC=C3)C(C)(C)C(F)(F)F		MTOR
(2S)-1-N-[4-methyl-5-[2-(1,1,1-trifluoro-2-methylpropan-2-yl)pyridin-4-yl]-1,3-thiazol-2-yl]pyrrolidine-1,2-dicarboxamide	CC1=C(SC(=N1)NC(=O)N2CCCC2C(=O)N)C3=CC(=NC=C3)C(C)(C)C(F)(F)F		PIK3C2B
(2S)-1-N-[4-methyl-5-[2-(1,1,1-trifluoro-2-methylpropan-2-yl)pyridin-4-yl]-1,3-thiazol-2-yl]pyrrolidine-1,2-dicarboxamide	CC1=C(SC(=N1)NC(=O)N2CCCC2C(=O)N)C3=CC(=NC=C3)C(C)(C)C(F)(F)F		PIK3CA
(2S)-1-N-[4-methyl-5-[2-(1,1,1-trifluoro-2-methylpropan-2-yl)pyridin-4-yl]-1,3-thiazol-2-yl]pyrrolidine-1,2-dicarboxamide	CC1=C(SC(=N1)NC(=O)N2CCCC2C(=O)N)C3=CC(=NC=C3)C(C)(C)C(F)(F)F		PIK3CB
(2S)-1-N-[4-methyl-5-[2-(1,1,1-trifluoro-2-methylpropan-2-yl)pyridin-4-yl]-1,3-thiazol-2-yl]pyrrolidine-1,2-dicarboxamide	CC1=C(SC(=N1)NC(=O)N2CCCC2C(=O)N)C3=CC(=NC=C3)C(C)(C)C(F)(F)F		PIK3CD
(2S)-1-N-[4-methyl-5-[2-(1,1,1-trifluoro-2-methylpropan-2-yl)pyridin-4-yl]-1,3-thiazol-2-yl]pyrrolidine-1,2-dicarboxamide	CC1=C(SC(=N1)NC(=O)N2CCCC2C(=O)N)C3=CC(=NC=C3)C(C)(C)C(F)(F)F		PIK3CG
(2S)-1-N-[4-methyl-5-[2-(1,1,1-trifluoro-2-methylpropan-2-yl)pyridin-4-yl]-1,3-thiazol-2-yl]pyrrolidine-1,2-dicarboxamide	CC1=C(SC(=N1)NC(=O)N2CCCC2C(=O)N)C3=CC(=NC=C3)C(C)(C)C(F)(F)F		PIK3R1
(2S)-1-N-[4-methyl-5-[2-(1,1,1-trifluoro-2-methylpropan-2-yl)pyridin-4-yl]-1,3-thiazol-2-yl]pyrrolidine-1,2-dicarboxamide	CC1=C(SC(=N1)NC(=O)N2CCCC2C(=O)N)C3=CC(=NC=C3)C(C)(C)C(F)(F)F		PIK3R3
N-[(1S)-3-[(2Z)-2-[(4R)-3,4-dimethyl-1,3-thiazolidin-2-ylidene]hydrazinyl]-1-(oxan-4-yl)-2,3-dioxopropyl]cycloheptanecarboxamide	CC1CSC(=NNC(=O)C(=O)C(C2CCOCC2)NC(=O)C3CCCCCC3)N1C		CTSK
N-[3-[(5R)-3-amino-2,5-dimethyl-1,1-dioxo-6H-1,2,4-thiadiazin-5-yl]-4-fluorophenyl]-5-fluoropyridine-2-carboxamide	CC1(CS(=O)(=O)N(C(=N1)N)C)C2=C(C=CC(=C2)NC(=O)C3=NC=C(C=C3)F)F		BACE1
7-methylidene-6-phenyl-3-pyridin-4-yl-5,8-dihydro-1H-pyrazolo[4,3-g]quinazoline	C=C1NC2=CC3=C(C=C2CN1C4=CC=CC=C4)C(=NN3)C5=CC=NC=C5		MAPK1
(2S)-2-[6-[(3-methyl-1-oxo-2H-benzo[f]quinazolin-9-yl)methylamino]-3-oxo-1H-isoindol-2-yl]pentanedioic acid	CC1=NC2=C(C3=C(C=CC(=C3)CNC4=CC5=C(C=C4)C(=O)N(C5)C(CCC(=O)O)C(=O)O)C=C2)C(=O)N1		TYMS
1-[3-[2-[4-(2-methylquinolin-5-yl)piperazin-1-yl]ethyl]phenyl]imidazolidin-2-one	CC1=NC2=C(C=C1)C(=CC=C2)N3CCN(CC3)CCC4=CC(=CC=C4)N5CCNC5=O		HTR1D
(2R)-1,1,1-trifluoro-4-(5-fluoro-2,3-dihydro-1-benzofuran-7-yl)-4-methyl-2-[[(2-methylquinolin-5-yl)amino]methyl]pentan-2-ol	CC1=NC2=C(C=C1)C(=CC=C2)NCC(CC(C)(C)C3=CC(=CC4=C3OCC4)F)(C(F)(F)F)O		NR3C1
N-(4-methoxyphenyl)-N,2-dimethylquinazolin-4-amine	CC1=NC2=CC=CC=C2C(=N1)N(C)C3=CC=C(C=C3)OC		TUBA1A
N-(4-methoxyphenyl)-N,2-dimethylquinazolin-4-amine	CC1=NC2=CC=CC=C2C(=N1)N(C)C3=CC=C(C=C3)OC		TUBA1C
N-(4-methoxyphenyl)-N,2-dimethylquinazolin-4-amine	CC1=NC2=CC=CC=C2C(=N1)N(C)C3=CC=C(C=C3)OC		TUBA3C
N-(4-methoxyphenyl)-N,2-dimethylquinazolin-4-amine	CC1=NC2=CC=CC=C2C(=N1)N(C)C3=CC=C(C=C3)OC		TUBA4A
N-(4-methoxyphenyl)-N,2-dimethylquinazolin-4-amine	CC1=NC2=CC=CC=C2C(=N1)N(C)C3=CC=C(C=C3)OC		TUBB2A
N-(4-methoxyphenyl)-N,2-dimethylquinazolin-4-amine	CC1=NC2=CC=CC=C2C(=N1)N(C)C3=CC=C(C=C3)OC		TUBB2B
N-(4-methoxyphenyl)-N,2-dimethylquinazolin-4-amine	CC1=NC2=CC=CC=C2C(=N1)N(C)C3=CC=C(C=C3)OC		TUBB3
N-(4-methoxyphenyl)-N,2-dimethylquinazolin-4-amine	CC1=NC2=CC=CC=C2C(=N1)N(C)C3=CC=C(C=C3)OC		TUBB4A
N-(4-methoxyphenyl)-N,2-dimethylquinazolin-4-amine	CC1=NC2=CC=CC=C2C(=N1)N(C)C3=CC=C(C=C3)OC		TUBB6
(2S)-2-[[5-[methyl-[(2-methyl-4-oxo-3H-quinazolin-6-yl)methyl]amino]thiophene-2-carbonyl]amino]pentanedioic acid	CC1=NC2=C(C=C(C=C2)CN(C)C3=CC=C(S3)C(=O)NC(CCC(=O)O)C(=O)O)C(=O)N1		TYMS
(E)-3-(6-acetamidopyridin-3-yl)-N-[2-[2,4-dichloro-N-methyl-3-[(2-methylquinolin-8-yl)oxymethyl]anilino]-2-oxoethyl]prop-2-enamide	CC1=NC2=C(C=CC=C2OCC3=C(C=CC(=C3Cl)N(C)C(=O)CNC(=O)C=CC4=CN=C(C=C4)NC(=O)C)Cl)C=C1		BRAF
[5-amino-1-(2-methyl-3H-benzimidazol-5-yl)pyrazol-4-yl]-(1H-indol-2-yl)methanone	CC1=NC2=C(N1)C=C(C=C2)N3C(=C(C=N3)C(=O)C4=CC5=CC=CC=C5N4)N		FGFR1
[5-amino-1-(2-methyl-3H-benzimidazol-5-yl)pyrazol-4-yl]-(1H-indol-2-yl)methanone	CC1=NC2=C(N1)C=C(C=C2)N3C(=C(C=N3)C(=O)C4=CC5=CC=CC=C5N4)N		FGFR2
[5-amino-1-(2-methyl-3H-benzimidazol-5-yl)pyrazol-4-yl]-(1H-indol-2-yl)methanone	CC1=NC2=C(N1)C=C(C=C2)N3C(=C(C=N3)C(=O)C4=CC5=CC=CC=C5N4)N		FGFR3
5-(8-methyl-2-morpholin-4-yl-9-propan-2-ylpurin-6-yl)pyrimidin-2-amine	CC1=NC2=C(N=C(N=C2N1C(C)C)N3CCOCC3)C4=CN=C(N=C4)N		MTOR
5-(8-methyl-2-morpholin-4-yl-9-propan-2-ylpurin-6-yl)pyrimidin-2-amine	CC1=NC2=C(N=C(N=C2N1C(C)C)N3CCOCC3)C4=CN=C(N=C4)N		PIK3CA
5-(8-methyl-2-morpholin-4-yl-9-propan-2-ylpurin-6-yl)pyrimidin-2-amine	CC1=NC2=C(N=C(N=C2N1C(C)C)N3CCOCC3)C4=CN=C(N=C4)N		PIK3CB
5-(8-methyl-2-morpholin-4-yl-9-propan-2-ylpurin-6-yl)pyrimidin-2-amine	CC1=NC2=C(N=C(N=C2N1C(C)C)N3CCOCC3)C4=CN=C(N=C4)N		PIK3CD
5-(8-methyl-2-morpholin-4-yl-9-propan-2-ylpurin-6-yl)pyrimidin-2-amine	CC1=NC2=C(N=C(N=C2N1C(C)C)N3CCOCC3)C4=CN=C(N=C4)N		PIK3CG
5-(8-methyl-2-morpholin-4-yl-9-propan-2-ylpurin-6-yl)pyrimidin-2-amine	CC1=NC2=C(N=C(N=C2N1C(C)C)N3CCOCC3)C4=CN=C(N=C4)N		PIK3R1
5-(8-methyl-2-morpholin-4-yl-9-propan-2-ylpurin-6-yl)pyrimidin-2-amine	CC1=NC2=C(N=C(N=C2N1C(C)C)N3CCOCC3)C4=CN=C(N=C4)N		PIK3R3
[2-[(1S,2S,4R,8S,9S,11S,12S,13R)-11-hydroxy-6,9,13-trimethyl-16-oxo-5-oxa-7-azapentacyclo[10.8.0.02,9.04,8.013,18]icosa-6,14,17-trien-8-yl]-2-oxoethyl] acetate	CC1=NC2(C(O1)CC3C2(CC(C4C3CCC5=CC(=O)C=CC45C)O)C)C(=O)COC(=O)C		NR3C1
2-[4-(2-methylpyridin-4-yl)phenyl]-N-(4-pyridin-3-ylphenyl)acetamide	CC1=NC=CC(=C1)C2=CC=C(C=C2)CC(=O)NC3=CC=C(C=C3)C4=CN=CC=C4		PORCN
5-chloro-2-(6-methylpyridin-3-yl)-3-(4-methylsulfonylphenyl)pyridine	CC1=NC=C(C=C1)C2=C(C=C(C=N2)Cl)C3=CC=C(C=C3)S(=O)(=O)C		PTGS2
2-[4-(1,3-benzodioxol-5-yl)-2-tert-butyl-1H-imidazol-5-yl]-6-methylpyridine	CC1=NC(=CC=C1)C2=C(N=C(N2)C(C)(C)C)C3=CC4=C(C=C3)OCO4		TGFBR1
6-[2-tert-butyl-5-(6-methylpyridin-2-yl)-1H-imidazol-4-yl]quinoxaline	CC1=NC(=CC=C1)C2=C(N=C(N2)C(C)(C)C)C3=CC4=NC=CN=C4C=C3		TGFBR1
2-fluoro-N-[[5-(6-methylpyridin-2-yl)-4-([1,2,4]triazolo[1,5-a]pyridin-6-yl)-1H-imidazol-2-yl]methyl]aniline	CC1=NC(=CC=C1)C2=C(N=C(N2)CNC3=CC=CC=C3F)C4=CN5C(=NC=N5)C=C4		TGFBR1
4-[2-(6-methylpyridin-2-yl)-5,6-dihydro-4H-pyrrolo[1,2-b]pyrazol-3-yl]quinoline-6-carboxamide	CC1=NC(=CC=C1)C2=NN3CCCC3=C2C4=C5C=C(C=CC5=NC=C4)C(=O)N		TGFBR1
N-[7-chloro-1-[(3R)-1-[(E)-4-(dimethylamino)but-2-enoyl]azepan-3-yl]benzimidazol-2-yl]-2-methylpyridine-4-carboxamide	CC1=NC=CC(=C1)C(=O)NC2=NC3=C(N2C4CCCCN(C4)C(=O)C=CCN(C)C)C(=CC=C3)Cl		EGFR
methyl 4-[[2-fluoro-3-[(6-methylpyridin-3-yl)carbamoylamino]phenyl]methyl]piperazine-1-carboxylate	CC1=NC=C(C=C1)NC(=O)NC2=CC=CC(=C2F)CN3CCN(CC3)C(=O)OC		MYL4
2-methoxy-N-[(E)-3-[4-[3-methyl-4-(6-methylpyridin-3-yl)oxyanilino]quinazolin-6-yl]prop-2-enyl]acetamide	CC1=NC=C(C=C1)OC2=C(C=C(C=C2)NC3=NC=NC4=C3C=C(C=C4)C=CCNC(=O)COC)C		ERBB2
(2S,4R)-1-[2-[3-acetyl-5-(2-methylpyrimidin-5-yl)indazol-1-yl]acetyl]-N-(6-bromopyridin-2-yl)-4-fluoropyrrolidine-2-carboxamide	CC1=NC=C(C=N1)C2=CC3=C(C=C2)N(N=C3C(=O)C)CC(=O)N4CC(CC4C(=O)NC5=NC(=CC=C5)Br)F		CFD
N-[(2S)-3-methoxy-1-[[(2S)-3-methoxy-1-[[(2S)-1-[(2R)-2-methyloxiran-2-yl]-1-oxo-3-phenylpropan-2-yl]amino]-1-oxopropan-2-yl]amino]-1-oxopropan-2-yl]-2-methyl-1,3-thiazole-5-carboxamide	CC1=NC=C(S1)C(=O)NC(COC)C(=O)NC(COC)C(=O)NC(CC2=CC=CC=C2)C(=O)C3(CO3)C		PSMB8
N-[(2S)-3-methoxy-1-[[(2S)-3-methoxy-1-[[(2S)-1-[(2R)-2-methyloxiran-2-yl]-1-oxo-3-phenylpropan-2-yl]amino]-1-oxopropan-2-yl]amino]-1-oxopropan-2-yl]-2-methyl-1,3-thiazole-5-carboxamide	CC1=NC=C(S1)C(=O)NC(COC)C(=O)NC(COC)C(=O)NC(CC2=CC=CC=C2)C(=O)C3(CO3)C		PSMB9
5-(3-methoxyphenyl)-3-(5-methyl-1,2,4-oxadiazol-3-yl)-1H-1,6-naphthyridin-2-one	CC1=NC(=NO1)C2=CC3=C(C=CN=C3C4=CC(=CC=C4)OC)NC2=O		GABRA2
5-(3-methoxyphenyl)-3-(5-methyl-1,2,4-oxadiazol-3-yl)-1H-1,6-naphthyridin-2-one	CC1=NC(=NO1)C2=CC3=C(C=CN=C3C4=CC(=CC=C4)OC)NC2=O		GABRA3
5-(3-methoxyphenyl)-3-(5-methyl-1,2,4-oxadiazol-3-yl)-1H-1,6-naphthyridin-2-one	CC1=NC(=NO1)C2=CC3=C(C=CN=C3C4=CC(=CC=C4)OC)NC2=O		GABRB3
5-(3-methoxyphenyl)-3-(5-methyl-1,2,4-oxadiazol-3-yl)-1H-1,6-naphthyridin-2-one	CC1=NC(=NO1)C2=CC3=C(C=CN=C3C4=CC(=CC=C4)OC)NC2=O		GABRE
5-(3-methoxyphenyl)-3-(5-methyl-1,2,4-oxadiazol-3-yl)-1H-1,6-naphthyridin-2-one	CC1=NC(=NO1)C2=CC3=C(C=CN=C3C4=CC(=CC=C4)OC)NC2=O		GABRP
N-[2-[[2-[(2S)-2-cyanopyrrolidin-1-yl]-2-oxoethyl]amino]-2-methylpropyl]-2-methylpyrazolo[1,5-a]pyrimidine-6-carboxamide	CC1=NN2C=C(C=NC2=C1)C(=O)NCC(C)(C)NCC(=O)N3CCCC3C#N		DPP4
8-chloro-1-methyl-6-phenyl-4H-[1,2,4]triazolo[4,3-a][1,4]benzodiazepine	CC1=NN=C2N1C3=C(C=C(C=C3)Cl)C(=NC2)C4=CC=CC=C4		GABRA2
8-chloro-1-methyl-6-phenyl-4H-[1,2,4]triazolo[4,3-a][1,4]benzodiazepine	CC1=NN=C2N1C3=C(C=C(C=C3)Cl)C(=NC2)C4=CC=CC=C4		GABRA3
8-chloro-1-methyl-6-phenyl-4H-[1,2,4]triazolo[4,3-a][1,4]benzodiazepine	CC1=NN=C2N1C3=C(C=C(C=C3)Cl)C(=NC2)C4=CC=CC=C4		GABRB3
8-chloro-1-methyl-6-phenyl-4H-[1,2,4]triazolo[4,3-a][1,4]benzodiazepine	CC1=NN=C2N1C3=C(C=C(C=C3)Cl)C(=NC2)C4=CC=CC=C4		GABRE
8-chloro-1-methyl-6-phenyl-4H-[1,2,4]triazolo[4,3-a][1,4]benzodiazepine	CC1=NN=C2N1C3=C(C=C(C=C3)Cl)C(=NC2)C4=CC=CC=C4		GABRP
8-chloro-6-(2-chlorophenyl)-1-methyl-4H-[1,2,4]triazolo[4,3-a][1,4]benzodiazepine	CC1=NN=C2N1C3=C(C=C(C=C3)Cl)C(=NC2)C4=CC=CC=C4Cl		GABRA2
8-chloro-6-(2-chlorophenyl)-1-methyl-4H-[1,2,4]triazolo[4,3-a][1,4]benzodiazepine	CC1=NN=C2N1C3=C(C=C(C=C3)Cl)C(=NC2)C4=CC=CC=C4Cl		GABRA3
8-chloro-6-(2-chlorophenyl)-1-methyl-4H-[1,2,4]triazolo[4,3-a][1,4]benzodiazepine	CC1=NN=C2N1C3=C(C=C(C=C3)Cl)C(=NC2)C4=CC=CC=C4Cl		GABRB3
8-chloro-6-(2-chlorophenyl)-1-methyl-4H-[1,2,4]triazolo[4,3-a][1,4]benzodiazepine	CC1=NN=C2N1C3=C(C=C(C=C3)Cl)C(=NC2)C4=CC=CC=C4Cl		GABRE
8-chloro-6-(2-chlorophenyl)-1-methyl-4H-[1,2,4]triazolo[4,3-a][1,4]benzodiazepine	CC1=NN=C2N1C3=C(C=C(C=C3)Cl)C(=NC2)C4=CC=CC=C4Cl		GABRP
N-[2-fluoro-5-[[3-[(E)-2-pyridin-2-ylethenyl]-1H-indazol-6-yl]amino]phenyl]-2,5-dimethylpyrazole-3-carboxamide	CC1=NN(C(=C1)C(=O)NC2=C(C=CC(=C2)NC3=CC4=C(C=C3)C(=NN4)C=CC5=CC=CC=N5)F)C		FLT1
N-[2-fluoro-5-[[3-[(E)-2-pyridin-2-ylethenyl]-1H-indazol-6-yl]amino]phenyl]-2,5-dimethylpyrazole-3-carboxamide	CC1=NN(C(=C1)C(=O)NC2=C(C=CC(=C2)NC3=CC4=C(C=C3)C(=NN4)C=CC5=CC=CC=N5)F)C		FLT4
N-[2-fluoro-5-[[3-[(E)-2-pyridin-2-ylethenyl]-1H-indazol-6-yl]amino]phenyl]-2,5-dimethylpyrazole-3-carboxamide	CC1=NN(C(=C1)C(=O)NC2=C(C=CC(=C2)NC3=CC4=C(C=C3)C(=NN4)C=CC5=CC=CC=N5)F)C		KDR
[(2S,4S)-4-[4-(5-methyl-2-phenylpyrazol-3-yl)piperazin-1-yl]pyrrolidin-2-yl]-(1,3-thiazolidin-3-yl)methanone	CC1=NN(C(=C1)N2CCN(CC2)C3CC(NC3)C(=O)N4CCSC4)C5=CC=CC=C5		DPP4
2-[[5-chloro-2-[(5-methyl-2-propan-2-ylpyrazol-3-yl)amino]pyridin-4-yl]amino]-N-methoxybenzamide	CC1=NN(C(=C1)NC2=NC=C(C(=C2)NC3=CC=CC=C3C(=O)NOC)Cl)C(C)C		PTK2
2-methyl-2-[4-[2-(5-methyl-2-propan-2-yl-1,2,4-triazol-3-yl)-5,6-dihydroimidazo[1,2-d][1,4]benzoxazepin-9-yl]pyrazol-1-yl]propanamide	CC1=NN(C(=N1)C2=CN3CCOC4=C(C3=N2)C=CC(=C4)C5=CN(N=C5)C(C)(C)C(=O)N)C(C)C		PIK3CA
2-methyl-2-[4-[2-(5-methyl-2-propan-2-yl-1,2,4-triazol-3-yl)-5,6-dihydroimidazo[1,2-d][1,4]benzoxazepin-9-yl]pyrazol-1-yl]propanamide	CC1=NN(C(=N1)C2=CN3CCOC4=C(C3=N2)C=CC(=C4)C5=CN(N=C5)C(C)(C)C(=O)N)C(C)C		PIK3CB
2-methyl-2-[4-[2-(5-methyl-2-propan-2-yl-1,2,4-triazol-3-yl)-5,6-dihydroimidazo[1,2-d][1,4]benzoxazepin-9-yl]pyrazol-1-yl]propanamide	CC1=NN(C(=N1)C2=CN3CCOC4=C(C3=N2)C=CC(=C4)C5=CN(N=C5)C(C)(C)C(=O)N)C(C)C		PIK3CD
2-methyl-2-[4-[2-(5-methyl-2-propan-2-yl-1,2,4-triazol-3-yl)-5,6-dihydroimidazo[1,2-d][1,4]benzoxazepin-9-yl]pyrazol-1-yl]propanamide	CC1=NN(C(=N1)C2=CN3CCOC4=C(C3=N2)C=CC(=C4)C5=CN(N=C5)C(C)(C)C(=O)N)C(C)C		PIK3CG
2-methyl-2-[4-[2-(5-methyl-2-propan-2-yl-1,2,4-triazol-3-yl)-5,6-dihydroimidazo[1,2-d][1,4]benzoxazepin-9-yl]pyrazol-1-yl]propanamide	CC1=NN(C(=N1)C2=CN3CCOC4=C(C3=N2)C=CC(=C4)C5=CN(N=C5)C(C)(C)C(=O)N)C(C)C		PIK3R1
2-methyl-2-[4-[2-(5-methyl-2-propan-2-yl-1,2,4-triazol-3-yl)-5,6-dihydroimidazo[1,2-d][1,4]benzoxazepin-9-yl]pyrazol-1-yl]propanamide	CC1=NN(C(=N1)C2=CN3CCOC4=C(C3=N2)C=CC(=C4)C5=CN(N=C5)C(C)(C)C(=O)N)C(C)C		PIK3R3
1-[4-[4-[3-methyl-4-[[(1R)-1-phenylethoxy]carbonylamino]-1,2-oxazol-5-yl]phenyl]phenyl]cyclopropane-1-carboxylic acid	CC1=NOC(=C1NC(=O)OC(C)C2=CC=CC=C2)C3=CC=C(C=C3)C4=CC=C(C=C4)C5(CC5)C(=O)O		LPAR1
7-chloro-3-methyl-4H-1lambda6,2,4-benzothiadiazine 1,1-dioxide	CC1=NS(=O)(=O)C2=C(N1)C=CC(=C2)Cl		KCNJ11
7-chloro-3-methyl-4H-1lambda6,2,4-benzothiadiazine 1,1-dioxide	CC1=NS(=O)(=O)C2=C(N1)C=CC(=C2)Cl		KCNJ8
(1S,2S,4R,8S,9S,11S,12R,13S)-8-(2-chloroacetyl)-12-fluoro-11-hydroxy-6,6,9,13-tetramethyl-5,7-dioxapentacyclo[10.8.0.02,9.04,8.013,18]icos-17-en-16-one	CC1(OC2CC3C4CCC5=CC(=O)CCC5(C4(C(CC3(C2(O1)C(=O)CCl)C)O)F)C)C		NR3C1
(1S,2S,4R,8S,9S,11S,12S,13R)-11-hydroxy-8-(2-hydroxyacetyl)-6,6,9,13-tetramethyl-5,7-dioxapentacyclo[10.8.0.02,9.04,8.013,18]icosa-14,17-dien-16-one	CC1(OC2CC3C4CCC5=CC(=O)C=CC5(C4C(CC3(C2(O1)C(=O)CO)C)O)C)C		NR3C1
[2-[(1S,2S,4R,8S,9S,11S,12R,13S)-12-fluoro-11-hydroxy-6,6,9,13-tetramethyl-16-oxo-5,7-dioxapentacyclo[10.8.0.02,9.04,8.013,18]icosa-14,17-dien-8-yl]-2-oxoethyl] 3,3-dimethylbutanoate	CC1(OC2CC3C4CCC5=CC(=O)C=CC5(C4(C(CC3(C2(O1)C(=O)COC(=O)CC(C)(C)C)C)O)F)C)C		NR3C1
(1S,2S,4R,8S,9S,11S,12S,13R,19S)-19-fluoro-11-hydroxy-8-(2-hydroxyacetyl)-6,6,9,13-tetramethyl-5,7-dioxapentacyclo[10.8.0.02,9.04,8.013,18]icosa-14,17-dien-16-one	CC1(OC2CC3C4CC(C5=CC(=O)C=CC5(C4C(CC3(C2(O1)C(=O)CO)C)O)C)F)C		NR3C1
(1S,2S,4R,8S,9S,11S,12S,13R,19S)-19-fluoro-11-hydroxy-8-(2-hydroxyacetyl)-6,6,9,13-tetramethyl-5,7-dioxapentacyclo[10.8.0.02,9.04,8.013,18]icos-17-en-16-one	CC1(OC2CC3C4CC(C5=CC(=O)CCC5(C4C(CC3(C2(O1)C(=O)CO)C)O)C)F)C		NR3C1
(1S,2S,4R,8S,9S,11S,12R,13S,19S)-12,19-difluoro-11-hydroxy-8-(2-hydroxyacetyl)-6,6,9,13-tetramethyl-5,7-dioxapentacyclo[10.8.0.02,9.04,8.013,18]icosa-14,17-dien-16-one	CC1(OC2CC3C4CC(C5=CC(=O)C=CC5(C4(C(CC3(C2(O1)C(=O)CO)C)O)F)C)F)C		NR3C1
[(1R,2S,6S,9R)-4,4,11,11-tetramethyl-3,5,7,10,12-pentaoxatricyclo[7.3.0.02,6]dodecan-6-yl]methyl sulfamate	CC1(OC2COC3(C(C2O1)OC(O3)(C)C)COS(=O)(=O)N)C		CA2
[(1R,2S,6S,9R)-4,4,11,11-tetramethyl-3,5,7,10,12-pentaoxatricyclo[7.3.0.02,6]dodecan-6-yl]methyl sulfamate	CC1(OC2COC3(C(C2O1)OC(O3)(C)C)COS(=O)(=O)N)C		GABRA2
[(1R,2S,6S,9R)-4,4,11,11-tetramethyl-3,5,7,10,12-pentaoxatricyclo[7.3.0.02,6]dodecan-6-yl]methyl sulfamate	CC1(OC2COC3(C(C2O1)OC(O3)(C)C)COS(=O)(=O)N)C		GABRA3
[(1R,2S,6S,9R)-4,4,11,11-tetramethyl-3,5,7,10,12-pentaoxatricyclo[7.3.0.02,6]dodecan-6-yl]methyl sulfamate	CC1(OC2COC3(C(C2O1)OC(O3)(C)C)COS(=O)(=O)N)C		GABRB3
[(1R,2S,6S,9R)-4,4,11,11-tetramethyl-3,5,7,10,12-pentaoxatricyclo[7.3.0.02,6]dodecan-6-yl]methyl sulfamate	CC1(OC2COC3(C(C2O1)OC(O3)(C)C)COS(=O)(=O)N)C		GABRE
[(1R,2S,6S,9R)-4,4,11,11-tetramethyl-3,5,7,10,12-pentaoxatricyclo[7.3.0.02,6]dodecan-6-yl]methyl sulfamate	CC1(OC2COC3(C(C2O1)OC(O3)(C)C)COS(=O)(=O)N)C		GABRP
[(1R,2S,6S,9R)-4,4,11,11-tetramethyl-3,5,7,10,12-pentaoxatricyclo[7.3.0.02,6]dodecan-6-yl]methyl sulfamate	CC1(OC2COC3(C(C2O1)OC(O3)(C)C)COS(=O)(=O)N)C		GRIK2
[(1R,2S,6S,9R)-4,4,11,11-tetramethyl-3,5,7,10,12-pentaoxatricyclo[7.3.0.02,6]dodecan-6-yl]methyl sulfamate	CC1(OC2COC3(C(C2O1)OC(O3)(C)C)COS(=O)(=O)N)C		GRIK5
[(1R,2S,6S,9R)-4,4,11,11-tetramethyl-3,5,7,10,12-pentaoxatricyclo[7.3.0.02,6]dodecan-6-yl]methyl sulfamate	CC1(OC2COC3(C(C2O1)OC(O3)(C)C)COS(=O)(=O)N)C		SCN3A
[(1R,2S,6S,9R)-4,4,11,11-tetramethyl-3,5,7,10,12-pentaoxatricyclo[7.3.0.02,6]dodecan-6-yl]methyl sulfamate	CC1(OC2COC3(C(C2O1)OC(O3)(C)C)COS(=O)(=O)N)C		SCN8A
[(1R,2S,6S,9R)-4,4,11,11-tetramethyl-3,5,7,10,12-pentaoxatricyclo[7.3.0.02,6]dodecan-6-yl]methyl sulfamate	CC1(OC2COC3(C(C2O1)OC(O3)(C)C)COS(=O)(=O)N)C		SCN9A
1-amino-13-ethylidene-11-methyl-6-azatricyclo[7.3.1.02,7]trideca-2(7),3,10-trien-5-one	CC=C1C2CC3=C(C1(CC(=C2)C)N)C=CC(=O)N3		ACHE
(1S,9R,13E)-1-amino-13-ethylidene-11-methyl-6-azatricyclo[7.3.1.02,7]trideca-3,6,10-trien-5-one	CC=C1C2CC3=NC(=O)C=CC3C1(CC(=C2)C)N		ACHE
2-(1,8-diethyl-4,9-dihydro-3H-pyrano[3,4-b]indol-1-yl)acetic acid	CCC1=C2C(=CC=C1)C3=C(N2)C(OCC3)(CC)CC(=O)O		PTGS2
2-[(1R)-1,8-diethyl-4,9-dihydro-3H-pyrano[3,4-b]indol-1-yl]acetic acid	CCC1=C2C(=CC=C1)C3=C(N2)C(OCC3)(CC)CC(=O)O		RXRA
(10S,23S)-23-amino-10-ethyl-18-fluoro-10-hydroxy-19-methyl-8-oxa-4,15-diazahexacyclo[14.7.1.02,14.04,13.06,11.020,24]tetracosa-1,6(11),12,14,16,18,20(24)-heptaene-5,9-dione	CCC1(C2=C(COC1=O)C(=O)N3CC4=C5C(CCC6=C5C(=CC(=C6C)F)N=C4C3=C2)N)O		TOP 1.00
(19S)-8-[(dimethylamino)methyl]-19-ethyl-7,19-dihydroxy-17-oxa-3,13-diazapentacyclo[11.8.0.02,11.04,9.015,20]henicosa-1(21),2,4(9),5,7,10,15(20)-heptaene-14,18-dione	CCC1(C2=C(COC1=O)C(=O)N3CC4=CC5=C(C=CC(=C5CN(C)C)O)N=C4C3=C2)O		TOP 1.00
(19S)-19-ethyl-19-hydroxy-10-[2-(propan-2-ylamino)ethyl]-17-oxa-3,13-diazapentacyclo[11.8.0.02,11.04,9.015,20]henicosa-1(21),2,4,6,8,10,15(20)-heptaene-14,18-dione	CCC1(C2=C(COC1=O)C(=O)N3CC4=C(C5=CC=CC=C5N=C4C3=C2)CCNC(C)C)O		TOP 1.00
(19S)-19-ethyl-19-hydroxy-10-[(E)-(2-methylpropan-2-yl)oxyiminomethyl]-17-oxa-3,13-diazapentacyclo[11.8.0.02,11.04,9.015,20]henicosa-1(21),2,4,6,8,10,15(20)-heptaene-14,18-dione	CCC1(C2=C(COC1=O)C(=O)N3CC4=C(C5=CC=CC=C5N=C4C3=C2)C=NOC(C)(C)C)O		TOP 1.00
(19S)-8-amino-19-ethyl-19-hydroxy-17-oxa-3,13-diazapentacyclo[11.8.0.02,11.04,9.015,20]henicosa-1(21),2,4,6,8,10,15(20)-heptaene-14,18-dione	CCC1(C2=C(COC1=O)C(=O)N3CC4=CC5=C(C=CC=C5N=C4C3=C2)N)O		TOP 1.00
(19S)-19-ethyl-19-hydroxy-17-oxa-3,13-diazapentacyclo[11.8.0.02,11.04,9.015,20]henicosa-1(21),2,4,6,8,10,15(20)-heptaene-14,18-dione	CCC1(C2=C(COC1=O)C(=O)N3CC4=CC5=CC=CC=C5N=C4C3=C2)O		TOP 1.00
[(19S)-19-ethyl-14,18-dioxo-17-oxa-3,13-diazapentacyclo[11.8.0.02,11.04,9.015,20]henicosa-1(21),2,4,6,8,10,15(20)-heptaen-19-yl] (2S)-2-[[(2S)-2-[[4-[(2R,3S,4R,5R,6S)-3,5-dihydroxy-4-methoxy-6-methyloxan-2-yl]oxyphenyl]carbamothioylamino]-3-(1H-imidazol-5-yl)propanoyl]amino]-3-methylbutanoate	CCC1(C2=C(COC1=O)C(=O)N3CC4=CC5=CC=CC=C5N=C4C3=C2)OC(=O)C(C(C)C)NC(=O)C(CC6=CN=CN6)NC(=S)NC7=CC=C(C=C7)OC8C(C(C(C(O8)C)O)OC)O		TOP 1.00
(19S)-10,19-diethyl-7,19-dihydroxy-17-oxa-3,13-diazapentacyclo[11.8.0.02,11.04,9.015,20]henicosa-1(21),2,4(9),5,7,10,15(20)-heptaene-14,18-dione	CCC1=C2CN3C(=CC4=C(C3=O)COC(=O)C4(CC)O)C2=NC5=C1C=C(C=C5)O		TOP 1.00
[(19S)-10,19-diethyl-19-hydroxy-14,18-dioxo-17-oxa-3,13-diazapentacyclo[11.8.0.02,11.04,9.015,20]henicosa-1(21),2,4(9),5,7,10,15(20)-heptaen-7-yl] 4-piperidin-1-ylpiperidine-1-carboxylate	CCC1=C2CN3C(=CC4=C(C3=O)COC(=O)C4(CC)O)C2=NC5=C1C=C(C=C5)OC(=O)N6CCC(CC6)N7CCCCC7		TOP 1.00
(1R,18R,20R,24S,27S,28S)-24-tert-butyl-N-[(1R,2R)-2-(difluoromethyl)-1-[(1-methylcyclopropyl)sulfonylcarbamoyl]cyclopropyl]-28-ethyl-13,13-difluoro-7-methoxy-22,25-dioxo-2,21-dioxa-4,11,23,26-tetrazapentacyclo[24.2.1.03,12.05,10.018,20]nonacosa-3,5(10),6,8,11-pentaene-27-carboxamide	CCC1C2CN(C1C(=O)NC3(CC3C(F)F)C(=O)NS(=O)(=O)C4(CC4)C)C(=O)C(NC(=O)OC5CC5CCCCC(C6=NC7=C(C=C(C=C7)OC)N=C6O2)(F)F)C(C)(C)C		KRAS
5-[2-ethoxy-5-(4-ethylpiperazin-1-yl)sulfonylpyridin-3-yl]-3-ethyl-2-(2-methoxyethyl)-6H-pyrazolo[4,3-d]pyrimidin-7-one	CCC1=C2C(=NN1CCOC)C(=O)NC(=N2)C3=C(N=CC(=C3)S(=O)(=O)N4CCN(CC4)CC)OCC		PDE5A
(1R,21S,24S)-21-tert-butyl-N-[(1R,2R)-1-(cyclopropylsulfonylcarbamoyl)-2-ethylcyclopropyl]-16,16-dimethyl-3,19,22-trioxo-2,18-dioxa-4,20,23-triazatetracyclo[21.2.1.14,7.06,11]heptacosa-6(11),7,9-triene-24-carboxamide	CCC1CC1(C(=O)NS(=O)(=O)C2CC2)NC(=O)C3CC4CN3C(=O)C(NC(=O)OCC(CCCCC5=C6CN(CC6=CC=C5)C(=O)O4)(C)C)C(C)(C)C		KRAS
(1R,2R)-1-[[(2S,4R)-1-[(2S)-2-[[(1R,5S)-3-bicyclo[3.1.0]hexanyl]oxycarbonylamino]-3,3-dimethylbutanoyl]-4-[8-chloro-7-(2-morpholin-4-ylethoxy)-2-[2-(propan-2-ylamino)-1,3-thiazol-4-yl]quinolin-4-yl]oxypyrrolidine-2-carbonyl]amino]-2-ethylcyclopropane-1-carboxylic acid	CCC1CC1(C(=O)O)NC(=O)C2CC(CN2C(=O)C(C(C)(C)C)NC(=O)OC3CC4CC4C3)OC5=CC(=NC6=C5C=CC(=C6Cl)OCCN7CCOCC7)C8=CSC(=N8)NC(C)C		KRAS
5-(2-ethyl-5-fluoro-1,3-dihydroinden-2-yl)-1H-imidazole	CCC1(CC2=C(C1)C=C(C=C2)F)C3=CN=CN3		ADRA2C
8-(1-hydroxyethyl)-2-methoxy-3-[(4-methoxyphenyl)methoxy]benzo[c]chromen-6-one	CC(C1=CC2=C(C=C1)C3=CC(=C(C=C3OC2=O)OCC4=CC=C(C=C4)OC)OC)O		MTOR
2-(6-chloro-9H-carbazol-2-yl)propanoic acid	CC(C1=CC2=C(C=C1)C3=C(N2)C=CC(=C3)Cl)C(=O)O		PTGS2
2-methylsulfonylethyl (2S)-2-(6-methoxynaphthalen-2-yl)propanoate	CC(C1=CC2=C(C=C1)C=C(C=C2)OC)C(=O)OCCS(=O)(=O)C		PTGS1
2-methylsulfonylethyl (2S)-2-(6-methoxynaphthalen-2-yl)propanoate	CC(C1=CC2=C(C=C1)C=C(C=C2)OC)C(=O)OCCS(=O)(=O)C		PTGS2
9-ethyl-6,6-dimethyl-8-(4-morpholin-4-ylpiperidin-1-yl)-11-oxo-5H-benzo[b]carbazole-3-carbonitrile	CCC1=CC2=C(C=C1N3CCC(CC3)N4CCOCC4)C(C5=C(C2=O)C6=C(N5)C=C(C=C6)C#N)(C)C		ALK
2-amino-N-[(1S)-1-[8-[2-(1-methylpyrazol-4-yl)ethynyl]-1-oxo-2-phenylisoquinolin-3-yl]ethyl]pyrazolo[1,5-a]pyrimidine-3-carboxamide	CC(C1=CC2=C(C(=CC=C2)C#CC3=CN(N=C3)C)C(=O)N1C4=CC=CC=C4)NC(=O)C5=C6N=CC=CN6N=C5N		PIK3CG
8-chloro-2-phenyl-3-[(1S)-1-(7H-purin-6-ylamino)ethyl]isoquinolin-1-one	CC(C1=CC2=C(C(=CC=C2)Cl)C(=O)N1C3=CC=CC=C3)NC4=NC=NC5=C4NC=N5		PIK3CD
8-chloro-2-phenyl-3-[(1S)-1-(7H-purin-6-ylamino)ethyl]isoquinolin-1-one	CC(C1=CC2=C(C(=CC=C2)Cl)C(=O)N1C3=CC=CC=C3)NC4=NC=NC5=C4NC=N5		PIK3CG
5-[[(1S)-1-(6-chloro-2-oxo-1H-quinolin-3-yl)ethyl]amino]-1-methyl-6-oxopyridine-2-carbonitrile	CC(C1=CC2=C(C=CC(=C2)Cl)NC1=O)NC3=CC=C(N(C3=O)C)C#N		IDH1
1-[1-(1-benzothiophen-2-yl)ethyl]-1-hydroxyurea	CC(C1=CC2=CC=CC=C2S1)N(C(=O)N)O		ALOX5
methyl 2-(1-benzyl-2-ethyl-3-oxamoylindol-4-yl)oxyacetate	CCC1=C(C2=C(N1CC3=CC=CC=C3)C=CC=C2OCC(=O)OC)C(=O)C(=O)N		PLA2G2A
2-(1-benzyl-2-ethyl-3-oxamoylindol-4-yl)oxyacetic acid	CCC1=C(C2=C(N1CC3=CC=CC=C3)C=CC=C2OCC(=O)O)C(=O)C(=O)N		PLA2G2A
5-(2-chlorophenyl)-7-ethyl-1-methyl-3H-thieno[2,3-e][1,4]diazepin-2-one	CCC1=CC2=C(S1)N(C(=O)CN=C2C3=CC=CC=C3Cl)C		GABRA2
5-(2-chlorophenyl)-7-ethyl-1-methyl-3H-thieno[2,3-e][1,4]diazepin-2-one	CCC1=CC2=C(S1)N(C(=O)CN=C2C3=CC=CC=C3Cl)C		GABRA3
5-(2-chlorophenyl)-7-ethyl-1-methyl-3H-thieno[2,3-e][1,4]diazepin-2-one	CCC1=CC2=C(S1)N(C(=O)CN=C2C3=CC=CC=C3Cl)C		GABRB3
5-(2-chlorophenyl)-7-ethyl-1-methyl-3H-thieno[2,3-e][1,4]diazepin-2-one	CCC1=CC2=C(S1)N(C(=O)CN=C2C3=CC=CC=C3Cl)C		GABRE
5-(2-chlorophenyl)-7-ethyl-1-methyl-3H-thieno[2,3-e][1,4]diazepin-2-one	CCC1=CC2=C(S1)N(C(=O)CN=C2C3=CC=CC=C3Cl)C		GABRP
(8R,9S,10R,13S,14S,17S)-17-ethyl-13-methyl-2,3,6,7,8,9,10,11,12,14,15,16-dodecahydro-1H-cyclopenta[a]phenanthren-17-ol	CCC1(CCC2C1(CCC3C2CCC4=CCCCC34)C)O		AR
2-[(1S)-1-[(3aS,4E,7aS)-4-[(2Z)-2-[(3S,5R)-3,5-dihydroxy-2-methylidenecyclohexylidene]ethylidene]-7a-methyl-3a,5,6,7-tetrahydro-3H-inden-1-yl]ethoxy]-N-(2,2,3,3,3-pentafluoropropyl)acetamide	CC(C1=CCC2C1(CCCC2=CC=C3CC(CC(C3=C)O)O)C)OCC(=O)NCC(C(F)(F)F)(F)F		VDR
8-[(1R)-1-(3,5-difluoroanilino)ethyl]-N,N-dimethyl-2-morpholin-4-yl-4-oxochromene-6-carboxamide	CC(C1=CC(=CC2=C1OC(=CC2=O)N3CCOCC3)C(=O)N(C)C)NC4=CC(=CC(=C4)F)F		PIK3CA
8-[(1R)-1-(3,5-difluoroanilino)ethyl]-N,N-dimethyl-2-morpholin-4-yl-4-oxochromene-6-carboxamide	CC(C1=CC(=CC2=C1OC(=CC2=O)N3CCOCC3)C(=O)N(C)C)NC4=CC(=CC(=C4)F)F		PIK3CB
8-[(1R)-1-(3,5-difluoroanilino)ethyl]-N,N-dimethyl-2-morpholin-4-yl-4-oxochromene-6-carboxamide	CC(C1=CC(=CC2=C1OC(=CC2=O)N3CCOCC3)C(=O)N(C)C)NC4=CC(=CC(=C4)F)F		PIK3CD
4-chloro-N-[(1S,2S)-2-[[(1R)-1-naphthalen-1-ylethyl]amino]cyclohexyl]benzamide	CC(C1=CC=CC2=CC=CC=C21)NC3CCCCC3NC(=O)C4=CC=C(C=C4)Cl		DEPTOR
4-chloro-N-[(1S,2S)-2-[[(1R)-1-naphthalen-1-ylethyl]amino]cyclohexyl]benzamide	CC(C1=CC=CC2=CC=CC=C21)NC3CCCCC3NC(=O)C4=CC=C(C=C4)Cl		MTOR
(2R)-N-(4-chlorophenyl)-2-[4-(6-fluoroquinolin-4-yl)cyclohexyl]propanamide	CC(C1CCC(CC1)C2=C3C=C(C=CC3=NC=C2)F)C(=O)NC4=CC=C(C=C4)Cl		IDO1
methyl 2-chloro-6-[3-fluoro-4-[(1R)-1-[[1-[(2,2,2-trifluoroacetyl)amino]cyclopropanecarbonyl]amino]ethyl]phenyl]benzoate	CC(C1=C(C=C(C=C1)C2=C(C(=CC=C2)Cl)C(=O)OC)F)NC(=O)C3(CC3)NC(=O)C(F)(F)F		BDKRB1
2-[1-(4-chlorophenyl)-1-phenylethoxy]-N,N-dimethylethanamine	CC(C1=CC=CC=C1)(C2=CC=C(C=C2)Cl)OCCN(C)C		HRH1
(2R)-2-(3-fluoro-4-phenylphenyl)propanoic acid	CC(C1=CC(=C(C=C1)C2=CC=CC=C2)F)C(=O)O		APH1B
(2R)-2-(3-fluoro-4-phenylphenyl)propanoic acid	CC(C1=CC(=C(C=C1)C2=CC=CC=C2)F)C(=O)O		PSEN2
(2S)-2-(3-fluoro-4-phenylphenyl)propanoic acid	CC(C1=CC(=C(C=C1)C2=CC=CC=C2)F)C(=O)O		PTGS1
2-(3-fluoro-4-phenylphenyl)propanoic acid	CC(C1=CC(=C(C=C1)C2=CC=CC=C2)F)C(=O)O		PTGS2
(2S)-3-[4-[5-(2-cyclopentyl-6-methoxypyridin-4-yl)-1,2,4-oxadiazol-3-yl]-2-ethyl-6-methylphenoxy]propane-1,2-diol	CCC1=C(C(=CC(=C1)C2=NOC(=N2)C3=CC(=NC(=C3)OC)C4CCCC4)C)OCC(CO)O		S1PR1
2-[4-[(2-oxocyclopentyl)methyl]phenyl]propanoic acid	CC(C1=CC=C(C=C1)CC2CCCC2=O)C(=O)O		PTGS1
2-[4-[(2-oxocyclopentyl)methyl]phenyl]propanoic acid	CC(C1=CC=C(C=C1)CC2CCCC2=O)C(=O)O		PTGS2
6-amino-5-[(1R)-1-(2,6-dichloro-3-fluorophenyl)ethoxy]-N-[4-(4-methylpiperazine-1-carbonyl)phenyl]pyridazine-3-carboxamide	CC(C1=C(C=CC(=C1Cl)F)Cl)OC2=CC(=NN=C2N)C(=O)NC3=CC=C(C=C3)C(=O)N4CCN(CC4)C		ALK
3-[(1R)-1-(2,6-dichloro-3-fluorophenyl)ethoxy]-5-(1-piperidin-4-ylpyrazol-4-yl)pyridin-2-amine	CC(C1=C(C=CC(=C1Cl)F)Cl)OC2=C(N=CC(=C2)C3=CN(N=C3)C4CCNCC4)N		ALK
3-[(1R)-1-(2,6-dichloro-3-fluorophenyl)ethoxy]-5-(1-piperidin-4-ylpyrazol-4-yl)pyridin-2-amine	CC(C1=C(C=CC(=C1Cl)F)Cl)OC2=C(N=CC(=C2)C3=CN(N=C3)C4CCNCC4)N		EML4
3-[(1R)-1-(2,6-dichloro-3-fluorophenyl)ethoxy]-5-(1-piperidin-4-ylpyrazol-4-yl)pyridin-2-amine	CC(C1=C(C=CC(=C1Cl)F)Cl)OC2=C(N=CC(=C2)C3=CN(N=C3)C4CCNCC4)N		MET
3-[(1R)-1-(2,6-dichloro-3-fluorophenyl)ethoxy]-5-(1-piperidin-4-ylpyrazol-4-yl)pyridin-2-amine	CC(C1=C(C=CC(=C1Cl)F)Cl)OC2=C(N=CC(=C2)C3=CN(N=C3)C4CCNCC4)N		NPM1
3-[(1R)-1-(2,6-dichloro-3-fluorophenyl)ethoxy]-5-(1-piperidin-4-ylpyrazol-4-yl)pyridin-2-amine	CC(C1=C(C=CC(=C1Cl)F)Cl)OC2=C(N=CC(=C2)C3=CN(N=C3)C4CCNCC4)N		ROS1
1-[[4-[(Z)-N-[[4-cyclohexyl-3-(trifluoromethyl)phenyl]methoxy]-C-methylcarbonimidoyl]-2-ethylphenyl]methyl]azetidine-3-carboxylic acid	CCC1=C(C=CC(=C1)C(=NOCC2=CC(=C(C=C2)C3CCCCC3)C(F)(F)F)C)CN4CC(C4)C(=O)O		S1PR1
2-(3-benzoylphenyl)propanoic acid	CC(C1=CC(=CC=C1)C(=O)C2=CC=CC=C2)C(=O)O		PTGS1
2-(3-benzoylphenyl)propanoic acid	CC(C1=CC(=CC=C1)C(=O)C2=CC=CC=C2)C(=O)O		PTGS2
2-[4-(thiophene-2-carbonyl)phenyl]propanoic acid	CC(C1=CC=C(C=C1)C(=O)C2=CC=CS2)C(=O)O		PTGS1
2-[4-(thiophene-2-carbonyl)phenyl]propanoic acid	CC(C1=CC=C(C=C1)C(=O)C2=CC=CS2)C(=O)O		PTGS2
(1S)-1-(4-fluorophenyl)-1-[2-[4-[6-(1-methylpyrazol-4-yl)pyrrolo[2,1-f][1,2,4]triazin-4-yl]piperazin-1-yl]pyrimidin-5-yl]ethanamine	CC(C1=CC=C(C=C1)F)(C2=CN=C(N=C2)N3CCN(CC3)C4=NC=NN5C4=CC(=C5)C6=CN(N=C6)C)N		KIT
(1S)-1-(4-fluorophenyl)-1-[2-[4-[6-(1-methylpyrazol-4-yl)pyrrolo[2,1-f][1,2,4]triazin-4-yl]piperazin-1-yl]pyrimidin-5-yl]ethanamine	CC(C1=CC=C(C=C1)F)(C2=CN=C(N=C2)N3CCN(CC3)C4=NC=NN5C4=CC(=C5)C6=CN(N=C6)C)N		PDGFRA
6-N-[(1S)-1-(4-fluorophenyl)ethyl]-4-(1-methylpyrazol-4-yl)-2-N-pyrazin-2-ylpyridine-2,6-diamine	CC(C1=CC=C(C=C1)F)NC2=CC(=CC(=N2)NC3=NC=CN=C3)C4=CN(N=C4)C		JAK2
2-[4-(3-oxo-1H-isoindol-2-yl)phenyl]propanoic acid	CC(C1=CC=C(C=C1)N2CC3=CC=CC=C3C2=O)C(=O)O		PTGS1
2-[4-(3-oxo-1H-isoindol-2-yl)phenyl]propanoic acid	CC(C1=CC=C(C=C1)N2CC3=CC=CC=C3C2=O)C(=O)O		PTGS2
2-[3-chloro-4-(2,5-dihydropyrrol-1-yl)phenyl]propanoic acid	CC(C1=CC(=C(C=C1)N2CC=CC2)Cl)C(=O)O		PTGS1
2-[3-chloro-4-(2,5-dihydropyrrol-1-yl)phenyl]propanoic acid	CC(C1=CC(=C(C=C1)N2CC=CC2)Cl)C(=O)O		PTGS2
N-(2,6-difluorophenyl)-5-[3-[2-[5-ethyl-2-methoxy-4-[4-(4-methylsulfonylpiperazin-1-yl)piperidin-1-yl]anilino]pyrimidin-4-yl]imidazo[1,2-a]pyridin-2-yl]-2-methoxybenzamide	CCC1=CC(=C(C=C1N2CCC(CC2)N3CCN(CC3)S(=O)(=O)C)OC)NC4=NC=CC(=N4)C5=C(N=C6N5C=CC=C6)C7=CC(=C(C=C7)OC)C(=O)NC8=C(C=CC=C8F)F		IGF1R
(1-methoxycarbonylcyclopropyl) 3-[(1R)-1-phenylethyl]imidazole-4-carboxylate	CC(C1=CC=CC=C1)N2C=NC=C2C(=O)OC3(CC3)C(=O)OC		GABRA2
(1-methoxycarbonylcyclopropyl) 3-[(1R)-1-phenylethyl]imidazole-4-carboxylate	CC(C1=CC=CC=C1)N2C=NC=C2C(=O)OC3(CC3)C(=O)OC		GABRA3
(1-methoxycarbonylcyclopropyl) 3-[(1R)-1-phenylethyl]imidazole-4-carboxylate	CC(C1=CC=CC=C1)N2C=NC=C2C(=O)OC3(CC3)C(=O)OC		GABRB3
(1-methoxycarbonylcyclopropyl) 3-[(1R)-1-phenylethyl]imidazole-4-carboxylate	CC(C1=CC=CC=C1)N2C=NC=C2C(=O)OC3(CC3)C(=O)OC		GABRE
(1-methoxycarbonylcyclopropyl) 3-[(1R)-1-phenylethyl]imidazole-4-carboxylate	CC(C1=CC=CC=C1)N2C=NC=C2C(=O)OC3(CC3)C(=O)OC		GABRP
4-[4-[[(1R)-1-phenylethyl]amino]-7H-pyrrolo[2,3-d]pyrimidin-6-yl]phenol	CC(C1=CC=CC=C1)NC2=NC=NC3=C2C=C(N3)C4=CC=C(C=C4)O		EGFR
N-(3-ethynylphenyl)-2,5,8,11-tetraoxa-15,17-diazatricyclo[10.8.0.014,19]icosa-1(12),13,15,17,19-pentaen-18-amine	C#CC1=CC(=CC=C1)NC2=NC=NC3=CC4=C(C=C32)OCCOCCOCCO4		EGFR
1-phenylethylhydrazine	CC(C1=CC=CC=C1)NN		MAOA
1-phenylethylhydrazine	CC(C1=CC=CC=C1)NN		MAOB
[3-(dimethylamino)azetidin-1-yl]-[(6S)-2-[6-(2-ethyl-4-hydroxyphenyl)-1H-indazol-3-yl]-5-propan-2-yl-3,4,6,7-tetrahydroimidazo[4,5-c]pyridin-6-yl]methanone	CCC1=C(C=CC(=C1)O)C2=CC3=C(C=C2)C(=NN3)C4=NC5=C(N4)CN(C(C5)C(=O)N6CC(C6)N(C)C)C(C)C		JAK1
[3-(dimethylamino)azetidin-1-yl]-[(6S)-2-[6-(2-ethyl-4-hydroxyphenyl)-1H-indazol-3-yl]-5-propan-2-yl-3,4,6,7-tetrahydroimidazo[4,5-c]pyridin-6-yl]methanone	CCC1=C(C=CC(=C1)O)C2=CC3=C(C=C2)C(=NN3)C4=NC5=C(N4)CN(C(C5)C(=O)N6CC(C6)N(C)C)C(C)C		JAK2
[3-(dimethylamino)azetidin-1-yl]-[(6S)-2-[6-(2-ethyl-4-hydroxyphenyl)-1H-indazol-3-yl]-5-propan-2-yl-3,4,6,7-tetrahydroimidazo[4,5-c]pyridin-6-yl]methanone	CCC1=C(C=CC(=C1)O)C2=CC3=C(C=C2)C(=NN3)C4=NC5=C(N4)CN(C(C5)C(=O)N6CC(C6)N(C)C)C(C)C		JAK3
3-(2-chlorophenyl)-N-[(1R)-1-(3-methoxyphenyl)ethyl]propan-1-amine	CC(C1=CC(=CC=C1)OC)NCCCC2=CC=CC=C2Cl		EPHX2
4-[4-(2,3-dihydro-1,4-benzodioxin-6-yl)-5-methyl-1H-pyrazol-3-yl]-6-ethylbenzene-1,3-diol	CCC1=CC(=C(C=C1O)O)C2=NNC(=C2C3=CC4=C(C=C3)OCCO4)C		HSP90AA1
N,N-dimethyl-2-[3-(1-pyridin-2-ylethyl)-1H-inden-2-yl]ethanamine	CC(C1=CC=CC=N1)C2=C(CC3=CC=CC=C32)CCN(C)C		HRH1
(2R,3S,4R,5R,6S)-5-amino-6-[(1R,2R,3S,4R,6S)-4,6-diamino-2-[(2S,3R,4S,5R)-5-[(1S)-1-aminoethyl]-3,4-dihydroxyoxolan-2-yl]oxy-3-hydroxycyclohexyl]oxy-2-[(1R)-1-hydroxyethyl]oxane-3,4-diol	CC(C1C(C(C(O1)OC2C(C(CC(C2OC3C(C(C(C(O3)C(C)O)O)O)N)N)N)O)O)O)N		RPL10
(2R,3S,4R,5R,6S)-5-amino-6-[(1R,2R,3S,4R,6S)-4,6-diamino-2-[(2S,3R,4S,5R)-5-[(1S)-1-aminoethyl]-3,4-dihydroxyoxolan-2-yl]oxy-3-hydroxycyclohexyl]oxy-2-[(1R)-1-hydroxyethyl]oxane-3,4-diol	CC(C1C(C(C(O1)OC2C(C(CC(C2OC3C(C(C(C(O3)C(C)O)O)O)N)N)N)O)O)O)N		RPL22
(2R,3S,4R,5R,6S)-5-amino-6-[(1R,2R,3S,4R,6S)-4,6-diamino-2-[(2S,3R,4S,5R)-5-[(1S)-1-aminoethyl]-3,4-dihydroxyoxolan-2-yl]oxy-3-hydroxycyclohexyl]oxy-2-[(1R)-1-hydroxyethyl]oxane-3,4-diol	CC(C1C(C(C(O1)OC2C(C(CC(C2OC3C(C(C(C(O3)C(C)O)O)O)N)N)N)O)O)O)N		RPL5
(2R,3S,4R,5R,6S)-5-amino-6-[(1R,2R,3S,4R,6S)-4,6-diamino-2-[(2S,3R,4S,5R)-5-[(1S)-1-aminoethyl]-3,4-dihydroxyoxolan-2-yl]oxy-3-hydroxycyclohexyl]oxy-2-[(1R)-1-hydroxyethyl]oxane-3,4-diol	CC(C1C(C(C(O1)OC2C(C(CC(C2OC3C(C(C(C(O3)C(C)O)O)O)N)N)N)O)O)O)N		RPS4Y1
3-ethyl-3-phenylpiperidine-2,6-dione	CCC1(CCC(=O)NC1=O)C2=CC=CC=C2		GABRA2
3-ethyl-3-phenylpiperidine-2,6-dione	CCC1(CCC(=O)NC1=O)C2=CC=CC=C2		GABRA3
3-ethyl-3-phenylpiperidine-2,6-dione	CCC1(CCC(=O)NC1=O)C2=CC=CC=C2		GABRB3
3-ethyl-3-phenylpiperidine-2,6-dione	CCC1(CCC(=O)NC1=O)C2=CC=CC=C2		GABRE
3-ethyl-3-phenylpiperidine-2,6-dione	CCC1(CCC(=O)NC1=O)C2=CC=CC=C2		GABRP
4-ethyl-3-methyl-N-[2-[4-[(4-methylcyclohexyl)carbamoylsulfamoyl]phenyl]ethyl]-5-oxo-2H-pyrrole-1-carboxamide	CCC1=C(CN(C1=O)C(=O)NCCC2=CC=C(C=C2)S(=O)(=O)NC(=O)NC3CCC(CC3)C)C		KCNJ11
2-[4-[(E)-2-[5-[(1R)-1-(3,5-dichloropyridin-4-yl)ethoxy]-1H-indazol-3-yl]ethenyl]pyrazol-1-yl]ethanol	CC(C1=C(C=NC=C1Cl)Cl)OC2=CC3=C(C=C2)NN=C3C=CC4=CN(N=C4)CCO		FGFR1
2-[4-[(E)-2-[5-[(1R)-1-(3,5-dichloropyridin-4-yl)ethoxy]-1H-indazol-3-yl]ethenyl]pyrazol-1-yl]ethanol	CC(C1=C(C=NC=C1Cl)Cl)OC2=CC3=C(C=C2)NN=C3C=CC4=CN(N=C4)CCO		FGFR2
2-[4-[(E)-2-[5-[(1R)-1-(3,5-dichloropyridin-4-yl)ethoxy]-1H-indazol-3-yl]ethenyl]pyrazol-1-yl]ethanol	CC(C1=C(C=NC=C1Cl)Cl)OC2=CC3=C(C=C2)NN=C3C=CC4=CN(N=C4)CCO		FGFR3
2-[4-[(E)-2-[5-[(1R)-1-(3,5-dichloropyridin-4-yl)ethoxy]-1H-indazol-3-yl]ethenyl]pyrazol-1-yl]ethanol	CC(C1=C(C=NC=C1Cl)Cl)OC2=CC3=C(C=C2)NN=C3C=CC4=CN(N=C4)CCO		FGFR4
4-[(1R)-1-[3-(difluoromethyl)-1-methylpyrazol-4-yl]sulfonyl-1-fluoroethyl]-N-(1,2-oxazol-3-yl)piperidine-1-carboxamide	CC(C1CCN(CC1)C(=O)NC2=NOC=C2)(F)S(=O)(=O)C3=CN(N=C3C(F)F)C		MYL4
3-ethyl-3-methylpyrrolidine-2,5-dione	CCC1(CC(=O)NC1=O)C		CACNA1H
(20R)-20-ethyl-6,7-difluoro-20-hydroxy-17-oxa-3,13-diazapentacyclo[11.9.0.02,11.04,9.015,21]docosa-1(22),2(11),3,5,7,9,15(21)-heptaene-14,18-dione	CCC1(CC(=O)OCC2=C1C=C3C4=C(CN3C2=O)C=C5C=C(C(=CC5=N4)F)F)O		TOP 1.00
2-[[2-ethyl-6-[4-[2-(3-hydroxyazetidin-1-yl)-2-oxoethyl]piperazin-1-yl]-8-methylimidazo[1,2-a]pyridin-3-yl]-methylamino]-4-(4-fluorophenyl)-1,3-thiazole-5-carbonitrile	CCC1=C(N2C=C(C=C(C2=N1)C)N3CCN(CC3)CC(=O)N4CC(C4)O)N(C)C5=NC(=C(S5)C#N)C6=CC=C(C=C6)F		ENPP2
3-[(1S)-1-imidazo[1,2-a]pyridin-6-ylethyl]-5-(1-methylpyrazol-4-yl)triazolo[4,5-b]pyrazine	CC(C1=CN2C=CN=C2C=C1)N3C4=NC(=CN=C4N=N3)C5=CN(N=C5)C		MET
3-ethyl-2-methyl-5-(morpholin-4-ylmethyl)-1,5,6,7-tetrahydroindol-4-one	CCC1=C(NC2=C1C(=O)C(CC2)CN3CCOCC3)C		DRD2
N-[(1S)-1-(7-fluoro-2-pyridin-2-ylquinolin-3-yl)ethyl]-7H-purin-6-amine	CC(C1=C(N=C2C=C(C=CC2=C1)F)C3=CC=CC=N3)NC4=NC=NC5=C4NC=N5		PIK3CD
(3S,4R)-3-ethyl-4-(1,5,7,10-tetrazatricyclo[7.3.0.02,6]dodeca-2(6),3,7,9,11-pentaen-12-yl)-N-(2,2,2-trifluoroethyl)pyrrolidine-1-carboxamide	CCC1CN(CC1C2=CN=C3N2C4=C(NC=C4)N=C3)C(=O)NCC(F)(F)F		JAK1
(3S,4R)-3-ethyl-4-(1,5,7,10-tetrazatricyclo[7.3.0.02,6]dodeca-2(6),3,7,9,11-pentaen-12-yl)-N-(2,2,2-trifluoroethyl)pyrrolidine-1-carboxamide	CCC1CN(CC1C2=CN=C3N2C4=C(NC=C4)N=C3)C(=O)NCC(F)(F)F		JAK2
(3S,4R)-3-ethyl-4-(1,5,7,10-tetrazatricyclo[7.3.0.02,6]dodeca-2(6),3,7,9,11-pentaen-12-yl)-N-(2,2,2-trifluoroethyl)pyrrolidine-1-carboxamide	CCC1CN(CC1C2=CN=C3N2C4=C(NC=C4)N=C3)C(=O)NCC(F)(F)F		JAK3
5-[[4-[2-[5-(1-hydroxyethyl)pyridin-2-yl]ethoxy]phenyl]methyl]-1,3-thiazolidine-2,4-dione	CC(C1=CN=C(C=C1)CCOC2=CC=C(C=C2)CC3C(=O)NC(=O)S3)O		PPARG
6-ethyl-3-[4-[4-(4-methylpiperazin-1-yl)piperidin-1-yl]anilino]-5-[(3R)-1-prop-2-enoylpyrrolidin-3-yl]oxypyrazine-2-carboxamide	CCC1=C(N=C(C(=N1)C(=O)N)NC2=CC=C(C=C2)N3CCC(CC3)N4CCN(CC4)C)OC5CCN(C5)C(=O)C=C		EGFR
6-ethyl-3-[3-methoxy-4-[4-(4-methylpiperazin-1-yl)piperidin-1-yl]anilino]-5-(oxan-4-ylamino)pyrazine-2-carboxamide	CCC1=C(N=C(C(=N1)C(=O)N)NC2=CC(=C(C=C2)N3CCC(CC3)N4CCN(CC4)C)OC)NC5CCOCC5		AXL
6-ethyl-3-[3-methoxy-4-[4-(4-methylpiperazin-1-yl)piperidin-1-yl]anilino]-5-(oxan-4-ylamino)pyrazine-2-carboxamide	CCC1=C(N=C(C(=N1)C(=O)N)NC2=CC(=C(C=C2)N3CCC(CC3)N4CCN(CC4)C)OC)NC5CCOCC5		FLT3
5-ethyl-3-[2-(2-fluorophenyl)ethyl]-2-(2-hydroxyphenyl)-6-methylpyrimidin-4-one	CCC1=C(N=C(N(C1=O)CCC2=CC=CC=C2F)C3=CC=CC=C3O)C		CHEK2
5-ethynyl-1H-pyrimidine-2,4-dione	C#CC1=CNC(=O)NC1=O		DPYD
5-(4-bromophenyl)-1-(2,4-dichlorophenyl)-4-ethyl-N-piperidin-1-ylpyrazole-3-carboxamide	CCC1=C(N(N=C1C(=O)NN2CCCCC2)C3=C(C=C(C=C3)Cl)Cl)C4=CC=C(C=C4)Br		CNR1
3,3-diethyl-5-methylpiperidine-2,4-dione	CCC1(C(=O)C(CNC1=O)C)CC		GABRA2
3,3-diethyl-5-methylpiperidine-2,4-dione	CCC1(C(=O)C(CNC1=O)C)CC		GABRA3
3,3-diethyl-5-methylpiperidine-2,4-dione	CCC1(C(=O)C(CNC1=O)C)CC		GABRB3
3,3-diethyl-5-methylpiperidine-2,4-dione	CCC1(C(=O)C(CNC1=O)C)CC		GABRE
3,3-diethyl-5-methylpiperidine-2,4-dione	CCC1(C(=O)C(CNC1=O)C)CC		GABRP
4-[[(7R)-8-cyclopentyl-7-ethyl-5-methyl-6-oxo-7H-pteridin-2-yl]amino]-3-methoxy-N-(1-methylpiperidin-4-yl)benzamide	CCC1C(=O)N(C2=CN=C(N=C2N1C3CCCC3)NC4=C(C=C(C=C4)C(=O)NC5CCN(CC5)C)OC)C		PLK2
7-ethylidene-4,21-di(propan-2-yl)-2-oxa-12,13-dithia-5,8,20,23-tetrazabicyclo[8.7.6]tricos-16-ene-3,6,9,19,22-pentone	CC=C1C(=O)NC(C(=O)OC2CC(=O)NC(C(=O)NC(CSSCCC=C2)C(=O)N1)C(C)C)C(C)C		HDAC11
(1S,4S,7Z,10S,16E,21R)-7-ethylidene-4,21-di(propan-2-yl)-2-oxa-12,13-dithia-5,8,20,23-tetrazabicyclo[8.7.6]tricos-16-ene-3,6,9,19,22-pentone	CC=C1C(=O)NC(C(=O)OC2CC(=O)NC(C(=O)NC(CSSCCC=C2)C(=O)N1)C(C)C)C(C)C		HDAC5
(1S,4S,7Z,10S,16E,21R)-7-ethylidene-4,21-di(propan-2-yl)-2-oxa-12,13-dithia-5,8,20,23-tetrazabicyclo[8.7.6]tricos-16-ene-3,6,9,19,22-pentone	CC=C1C(=O)NC(C(=O)OC2CC(=O)NC(C(=O)NC(CSSCCC=C2)C(=O)N1)C(C)C)C(C)C		HDAC9
5-ethyl-5-phenyl-1,3-diazinane-4,6-dione	CCC1(C(=O)NCNC1=O)C2=CC=CC=C2		GABRA2
5-ethyl-5-phenyl-1,3-diazinane-4,6-dione	CCC1(C(=O)NCNC1=O)C2=CC=CC=C2		GABRA3
5-ethyl-5-phenyl-1,3-diazinane-4,6-dione	CCC1(C(=O)NCNC1=O)C2=CC=CC=C2		GABRB3
5-ethyl-5-phenyl-1,3-diazinane-4,6-dione	CCC1(C(=O)NCNC1=O)C2=CC=CC=C2		GABRE
5-ethyl-5-phenyl-1,3-diazinane-4,6-dione	CCC1(C(=O)NCNC1=O)C2=CC=CC=C2		GABRP
5-ethyl-5-phenyl-1,3-diazinane-4,6-dione	CCC1(C(=O)NCNC1=O)C2=CC=CC=C2		SCN3A
5-ethyl-5-phenyl-1,3-diazinane-4,6-dione	CCC1(C(=O)NCNC1=O)C2=CC=CC=C2		SCN8A
5-ethyl-5-phenyl-1,3-diazinane-4,6-dione	CCC1(C(=O)NCNC1=O)C2=CC=CC=C2		SCN9A
5-ethyl-3-methyl-5-phenylimidazolidine-2,4-dione	CCC1(C(=O)N(C(=O)N1)C)C2=CC=CC=C2		SCN3A
5-ethyl-3-methyl-5-phenylimidazolidine-2,4-dione	CCC1(C(=O)N(C(=O)N1)C)C2=CC=CC=C2		SCN8A
5-ethyl-3-methyl-5-phenylimidazolidine-2,4-dione	CCC1(C(=O)N(C(=O)N1)C)C2=CC=CC=C2		SCN9A
5,5-diethyl-1-methyl-1,3-diazinane-2,4,6-trione	CCC1(C(=O)NC(=O)N(C1=O)C)CC		GABRA2
5,5-diethyl-1-methyl-1,3-diazinane-2,4,6-trione	CCC1(C(=O)NC(=O)N(C1=O)C)CC		GABRA3
5,5-diethyl-1-methyl-1,3-diazinane-2,4,6-trione	CCC1(C(=O)NC(=O)N(C1=O)C)CC		GABRB3
5,5-diethyl-1-methyl-1,3-diazinane-2,4,6-trione	CCC1(C(=O)NC(=O)N(C1=O)C)CC		GABRE
5,5-diethyl-1-methyl-1,3-diazinane-2,4,6-trione	CCC1(C(=O)NC(=O)N(C1=O)C)CC		GABRP
5-ethyl-3,5-dimethyl-1,3-oxazolidine-2,4-dione	CCC1(C(=O)N(C(=O)O1)C)C		CACNA1H
6-fluoro-3-phenyl-2-[(1S)-1-(7H-purin-6-ylamino)ethyl]quinazolin-4-one	CC(C1=NC2=C(C=C(C=C2)F)C(=O)N1C3=CC=CC=C3)NC4=NC=NC5=C4NC=N5		PIK3CD
1-[2-[4-(2-ethyl-4,6-dimethylimidazo[4,5-c]pyridin-1-yl)phenyl]ethyl]-3-(4-methylphenyl)sulfonylurea	CCC1=NC2=C(N1C3=CC=C(C=C3)CCNC(=O)NS(=O)(=O)C4=CC=C(C=C4)C)C=C(N=C2C)C		PTGER4
N-[4-[2-ethyl-4-(3-methylphenyl)-1,3-thiazol-5-yl]pyridin-2-yl]benzamide	CCC1=NC(=C(S1)C2=CC(=NC=C2)NC(=O)C3=CC=CC=C3)C4=CC=CC(=C4)C		MAPK11
2-[(1R)-1-[(6-amino-5-chloropyrimidine-4-carbonyl)amino]ethyl]-N-[5-chloro-4-(trifluoromethyl)pyridin-2-yl]-1,3-thiazole-5-carboxamide	CC(C1=NC=C(S1)C(=O)NC2=NC=C(C(=C2)C(F)(F)F)Cl)NC(=O)C3=C(C(=NC=N3)N)Cl		ARAF
2-[(1R)-1-[(6-amino-5-chloropyrimidine-4-carbonyl)amino]ethyl]-N-[5-chloro-4-(trifluoromethyl)pyridin-2-yl]-1,3-thiazole-5-carboxamide	CC(C1=NC=C(S1)C(=O)NC2=NC=C(C(=C2)C(F)(F)F)Cl)NC(=O)C3=C(C(=NC=N3)N)Cl		BRAF
2-[(1R)-1-[(6-amino-5-chloropyrimidine-4-carbonyl)amino]ethyl]-N-[5-chloro-4-(trifluoromethyl)pyridin-2-yl]-1,3-thiazole-5-carboxamide	CC(C1=NC=C(S1)C(=O)NC2=NC=C(C(=C2)C(F)(F)F)Cl)NC(=O)C3=C(C(=NC=N3)N)Cl		RAF1
12-cyclopentyl-10-ethyl-5-thiophen-2-yl-3,4,6,11,12-pentazatricyclo[7.3.0.02,6]dodeca-1(9),2,4,10-tetraene	CCC1=NN(C2=C1CCN3C2=NN=C3C4=CC=CS4)C5CCCC5		PDE4B
12-cyclopentyl-10-ethyl-5-thiophen-2-yl-3,4,6,11,12-pentazatricyclo[7.3.0.02,6]dodeca-1(9),2,4,10-tetraene	CCC1=NN(C2=C1CCN3C2=NN=C3C4=CC=CS4)C5CCCC5		PDE4C
12-cyclopentyl-10-ethyl-5-thiophen-2-yl-3,4,6,11,12-pentazatricyclo[7.3.0.02,6]dodeca-1(9),2,4,10-tetraene	CCC1=NN(C2=C1CCN3C2=NN=C3C4=CC=CS4)C5CCCC5		PDE4D
6-[(1R)-1-[8-fluoro-6-(1-methylpyrazol-4-yl)-[1,2,4]triazolo[4,3-a]pyridin-3-yl]ethyl]-3-(2-methoxyethoxy)-1,6-naphthyridin-5-one	CC(C1=NN=C2N1C=C(C=C2F)C3=CN(N=C3)C)N4C=CC5=C(C4=O)C=C(C=N5)OCCOC		MET
2-amino-5-oxo-7-propan-2-ylchromeno[2,3-b]pyridine-3-carboxylic acid	CC(C)C1=CC2=C(C=C1)OC3=NC(=C(C=C3C2=O)C(=O)O)N		PDE4B
2-amino-5-oxo-7-propan-2-ylchromeno[2,3-b]pyridine-3-carboxylic acid	CC(C)C1=CC2=C(C=C1)OC3=NC(=C(C=C3C2=O)C(=O)O)N		PDE4C
2-amino-5-oxo-7-propan-2-ylchromeno[2,3-b]pyridine-3-carboxylic acid	CC(C)C1=CC2=C(C=C1)OC3=NC(=C(C=C3C2=O)C(=O)O)N		PDE4D
3-[5-[(1R,2S)-2-(2,2-difluoropropanoylamino)-1-(2,3-dihydro-1,4-benzodioxin-6-yl)propoxy]indazol-1-yl]-N-[(3R)-oxolan-3-yl]benzamide	CC(C(C1=CC2=C(C=C1)OCCO2)OC3=CC4=C(C=C3)N(N=C4)C5=CC=CC(=C5)C(=O)NC6CCOC6)NC(=O)C(C)(F)F		NR3C1
(8S,11R,13S,14S,17S)-11-(1,3-benzodioxol-5-yl)-17-hydroxy-13-methyl-17-prop-1-ynyl-1,2,6,7,8,11,12,14,15,16-decahydrocyclopenta[a]phenanthren-3-one	CC#CC1(CCC2C1(CC(C3=C4CCC(=O)C=C4CCC23)C5=CC6=C(C=C5)OCO6)C)O		NR3C1
(8S,11R,13S,14S,17S)-11-[4-(dimethylamino)phenyl]-17-hydroxy-13-methyl-17-prop-1-ynyl-1,2,6,7,8,11,12,14,15,16-decahydrocyclopenta[a]phenanthren-3-one	CC#CC1(CCC2C1(CC(C3=C4CCC(=O)C=C4CCC23)C5=CC=C(C=C5)N(C)C)C)O		NR3C1
N-[6-(2-methylpyrazol-3-yl)-2,4-dioxo-7-propan-2-yl-1H-quinazolin-3-yl]methanesulfonamide	CC(C)C1=C(C=C2C(=C1)NC(=O)N(C2=O)NS(=O)(=O)C)C3=CC=NN3C		GRIK2
N-[6-(2-methylpyrazol-3-yl)-2,4-dioxo-7-propan-2-yl-1H-quinazolin-3-yl]methanesulfonamide	CC(C)C1=C(C=C2C(=C1)NC(=O)N(C2=O)NS(=O)(=O)C)C3=CC=NN3C		GRIK5
3-(2,4-dihydroxy-5-propan-2-ylphenyl)-4-(1-methylindol-5-yl)-1H-1,2,4-triazol-5-one	CC(C)C1=C(C=C(C(=C1)C2=NNC(=O)N2C3=CC4=C(C=C3)N(C=C4)C)O)O		ALK
3-(2,4-dihydroxy-5-propan-2-ylphenyl)-4-(1-methylindol-5-yl)-1H-1,2,4-triazol-5-one	CC(C)C1=C(C=C(C(=C1)C2=NNC(=O)N2C3=CC4=C(C=C3)N(C=C4)C)O)O		HSP90AA1
3-(2,4-dihydroxy-5-propan-2-ylphenyl)-4-(1-methylindol-5-yl)-1H-1,2,4-triazol-5-one	CC(C)C1=C(C=C(C(=C1)C2=NNC(=O)N2C3=CC4=C(C=C3)N(C=C4)C)O)O		HSP90AB1
N-[4-(2-tert-butylphenyl)sulfonylphenyl]-2,3,4-trihydroxy-5-[(2-propan-2-ylphenyl)methyl]benzamide	CC(C)C1=CC=CC=C1CC2=CC(=C(C(=C2O)O)O)C(=O)NC3=CC=C(C=C3)S(=O)(=O)C4=CC=CC=C4C(C)(C)C		BCL2
2-[(5Z)-5-[(E)-2-methyl-3-phenylprop-2-enylidene]-4-oxo-2-sulfanylidene-1,3-thiazolidin-3-yl]acetic acid	CC(=CC1=CC=CC=C1)C=C2C(=O)N(C(=S)S2)CC(=O)O		AKR1B1
2-[(1R)-1-cyclopropylethyl]-6-propan-2-ylphenol	CC(C)C1=C(C(=CC=C1)C(C)C2CC2)O		GABRA2
2-[(1R)-1-cyclopropylethyl]-6-propan-2-ylphenol	CC(C)C1=C(C(=CC=C1)C(C)C2CC2)O		GABRA3
2-[(1R)-1-cyclopropylethyl]-6-propan-2-ylphenol	CC(C)C1=C(C(=CC=C1)C(C)C2CC2)O		GABRB3
2-[(1R)-1-cyclopropylethyl]-6-propan-2-ylphenol	CC(C)C1=C(C(=CC=C1)C(C)C2CC2)O		GABRE
2-[(1R)-1-cyclopropylethyl]-6-propan-2-ylphenol	CC(C)C1=C(C(=CC=C1)C(C)C2CC2)O		GABRP
1-[[1-[4-(dimethylamino)phenyl]cyclopentyl]methyl]-3-[2,6-di(propan-2-yl)phenyl]urea	CC(C)C1=C(C(=CC=C1)C(C)C)NC(=O)NCC2(CCCC2)C3=CC=C(C=C3)N(C)C		SOAT1
2,6-di(propan-2-yl)phenol	CC(C)C1=C(C(=CC=C1)C(C)C)O		GABRA2
2,6-di(propan-2-yl)phenol	CC(C)C1=C(C(=CC=C1)C(C)C)O		GABRA3
2,6-di(propan-2-yl)phenol	CC(C)C1=C(C(=CC=C1)C(C)C)O		GABRB3
2,6-di(propan-2-yl)phenol	CC(C)C1=C(C(=CC=C1)C(C)C)O		GABRE
2,6-di(propan-2-yl)phenol	CC(C)C1=C(C(=CC=C1)C(C)C)O		GABRP
2-(4-propan-2-ylphenyl)-N-[(1R)-1-[5-(2,2,2-trifluoroethoxy)pyridin-2-yl]ethyl]acetamide	CC(C)C1=CC=C(C=C1)CC(=O)NC(C)C2=NC=C(C=C2)OCC(F)(F)F		CACNA1H
2-[1-[3-(trifluoromethyl)phenyl]propan-2-ylamino]ethyl benzoate	CC(CC1=CC(=CC=C1)C(F)(F)F)NCCOC(=O)C2=CC=CC=C2		SOAT1
(3S)-3-[4-chloro-3-[[(2S,3R)-2-(4-chlorophenyl)-4,4,4-trifluoro-3-methylbutanoyl]amino]phenyl]-3-cyclopropylpropanoic acid	CC(C(C1=CC=C(C=C1)Cl)C(=O)NC2=C(C=CC(=C2)C(CC(=O)O)C3CC3)Cl)C(F)(F)F		GUCY1A1
(3S)-3-[4-chloro-3-[[(2S,3R)-2-(4-chlorophenyl)-4,4,4-trifluoro-3-methylbutanoyl]amino]phenyl]-3-cyclopropylpropanoic acid	CC(C(C1=CC=C(C=C1)Cl)C(=O)NC2=C(C=CC(=C2)C(CC(=O)O)C3CC3)Cl)C(F)(F)F		GUCY1B1
(2R)-3-phenyl-2-[(4-propan-2-ylcyclohexanecarbonyl)amino]propanoic acid	CC(C)C1CCC(CC1)C(=O)NC(CC2=CC=CC=C2)C(=O)O		KCNJ11
(2R)-N-methyl-1-phenyl-N-prop-2-ynylpropan-2-amine	CC(CC1=CC=CC=C1)N(C)CC#C		MAOB
3-[3,5-dibromo-4-(4-hydroxy-3-propan-2-ylphenoxy)anilino]-3-oxopropanoic acid	CC(C)C1=C(C=CC(=C1)OC2=C(C=C(C=C2Br)NC(=O)CC(=O)O)Br)O		THRB
2-[3-[3-[2-ethyl-4-(4-fluorophenyl)-5-hydroxyphenoxy]propoxy]-2-propylphenoxy]benzoic acid	CCCC1=C(C=CC=C1OC2=CC=CC=C2C(=O)O)OCCCOC3=CC(=C(C=C3CC)C4=CC=C(C=C4)F)O		LTB4R
2-[3-[3-[2-ethyl-4-(4-fluorophenyl)-5-hydroxyphenoxy]propoxy]-2-propylphenoxy]benzoic acid	CCCC1=C(C=CC=C1OC2=CC=CC=C2C(=O)O)OCCCOC3=CC(=C(C=C3CC)C4=CC=C(C=C4)F)O		PPARG
5-[(E)-2-phenylethenyl]-2-propan-2-ylbenzene-1,3-diol	CC(C)C1=C(C=C(C=C1O)C=CC2=CC=CC=C2)O		AHR
4-[(2E,4E)-4-(4-hydroxyphenyl)hexa-2,4-dien-3-yl]phenol	CC=C(C1=CC=C(C=C1)O)C(=CC)C2=CC=C(C=C2)O		ESR1
4-[2-[4-[(E)-2-(5,5,8,8-tetramethyl-6,7-dihydronaphthalen-2-yl)prop-1-enyl]phenoxy]ethyl]morpholine	CC(=CC1=CC=C(C=C1)OCCN2CCOCC2)C3=CC4=C(C=C3)C(CCC4(C)C)(C)C		RARA
4-[2-[4-[(E)-2-(5,5,8,8-tetramethyl-6,7-dihydronaphthalen-2-yl)prop-1-enyl]phenoxy]ethyl]morpholine	CC(=CC1=CC=C(C=C1)OCCN2CCOCC2)C3=CC4=C(C=C3)C(CCC4(C)C)(C)C		RARB
4-[2-[4-[(E)-2-(5,5,8,8-tetramethyl-6,7-dihydronaphthalen-2-yl)prop-1-enyl]phenoxy]ethyl]morpholine	CC(=CC1=CC=C(C=C1)OCCN2CCOCC2)C3=CC4=C(C=C3)C(CCC4(C)C)(C)C		RARG
4-[2-[4-[(E)-2-(5,5,8,8-tetramethyl-6,7-dihydronaphthalen-2-yl)prop-1-enyl]phenoxy]ethyl]morpholine	CC(=CC1=CC=C(C=C1)OCCN2CCOCC2)C3=CC4=C(C=C3)C(CCC4(C)C)(C)C		RXRA
4-[2-[4-[(E)-2-(5,5,8,8-tetramethyl-6,7-dihydronaphthalen-2-yl)prop-1-enyl]phenoxy]ethyl]morpholine	CC(=CC1=CC=C(C=C1)OCCN2CCOCC2)C3=CC4=C(C=C3)C(CCC4(C)C)(C)C		RXRG
8-hydroxy-5-[(1R)-1-hydroxy-2-[[(2R)-1-(4-methoxyphenyl)propan-2-yl]amino]ethyl]-1H-quinolin-2-one	CC(CC1=CC=C(C=C1)OC)NCC(C2=C3C=CC(=O)NC3=C(C=C2)O)O		ADRB2
N-[2-hydroxy-5-[(1R)-1-hydroxy-2-[[(2R)-1-(4-methoxyphenyl)propan-2-yl]amino]ethyl]phenyl]formamide	CC(CC1=CC=C(C=C1)OC)NCC(C2=CC(=C(C=C2)O)NC=O)O		ADRB2
2,2,2-trifluoro-N-[(1R,2S)-1-[1-(4-fluorophenyl)indazol-5-yl]oxy-1-(3-methoxyphenyl)propan-2-yl]acetamide	CC(C(C1=CC(=CC=C1)OC)OC2=CC3=C(C=C2)N(N=C3)C4=CC=C(C=C4)F)NC(=O)C(F)(F)F		NR3C1
(2S)-2-amino-3-(4-hydroxyphenyl)-2-methylpropanoic acid	CC(CC1=CC=C(C=C1)O)(C(=O)O)N		TH
(1R,2S)-2-(methylamino)-1-phenylpropan-1-ol	CC(C(C1=CC=CC=C1)O)NC		ADRA1B
(1R,2S)-2-(methylamino)-1-phenylpropan-1-ol	CC(C(C1=CC=CC=C1)O)NC		ADRA2C
(1R,2S)-2-(methylamino)-1-phenylpropan-1-ol	CC(C(C1=CC=CC=C1)O)NC		ADRB2
5-[1-hydroxy-2-[1-(4-hydroxyphenyl)propan-2-ylamino]ethyl]benzene-1,3-diol	CC(CC1=CC=C(C=C1)O)NCC(C2=CC(=CC(=C2)O)O)O		ADRB2
4-[(2S,3R)-4-(3,4-dihydroxyphenyl)-2,3-dimethylbutyl]benzene-1,2-diol	CC(CC1=CC(=C(C=C1)O)O)C(C)CC2=CC(=C(C=C2)O)O		ERBB2
4-[(2S,3R)-4-(3,4-dihydroxyphenyl)-2,3-dimethylbutyl]benzene-1,2-diol	CC(CC1=CC(=C(C=C1)O)O)C(C)CC2=CC(=C(C=C2)O)O		IGF1R
(2,4-dihydroxy-5-propan-2-ylphenyl)-[5-[(4-methylpiperazin-1-yl)methyl]-1,3-dihydroisoindol-2-yl]methanone	CC(C)C1=CC(=C(C=C1O)O)C(=O)N2CC3=C(C2)C=C(C=C3)CN4CCN(CC4)C		HSP90AA1
(2,4-dihydroxy-5-propan-2-ylphenyl)-[5-[(4-methylpiperazin-1-yl)methyl]-1,3-dihydroisoindol-2-yl]methanone	CC(C)C1=CC(=C(C=C1O)O)C(=O)N2CC3=C(C2)C=C(C=C3)CN4CCN(CC4)C		HSP90AB1
(2S)-2-amino-3-(3,4-dihydroxyphenyl)-2-methylpropanoic acid	CC(CC1=CC(=C(C=C1)O)O)(C(=O)O)N		ADRA2C
(2S)-3-(3,4-dihydroxyphenyl)-2-hydrazinyl-2-methylpropanoic acid	CC(CC1=CC(=C(C=C1)O)O)(C(=O)O)NN		DDC
4-[(1R,2S)-2-amino-1-hydroxypropyl]benzene-1,2-diol	CC(C(C1=CC(=C(C=C1)O)O)O)N		ADRA2C
	CC#CC1=CC(=CN=C1)C2=CC3=C(CC4(C35N=C(C(=N5)N)C)CCC(CC4)OC)C=C2		BACE1
propyl 6-ethyl-5-ethylsulfanylcarbonyl-2-phenyl-4-propylpyridine-3-carboxylate	CCCC1=C(C(=NC(=C1C(=O)SCC)CC)C2=CC=CC=C2)C(=O)OCCC		MAP2K1
propyl 6-ethyl-5-ethylsulfanylcarbonyl-2-phenyl-4-propylpyridine-3-carboxylate	CCCC1=C(C(=NC(=C1C(=O)SCC)CC)C2=CC=CC=C2)C(=O)OCCC		MAP2K2
2-[3,5-dichloro-4-[(6-oxo-5-propan-2-yl-1H-pyridazin-3-yl)oxy]phenyl]-3,5-dioxo-1,2,4-triazine-6-carbonitrile	CC(C)C1=CC(=NNC1=O)OC2=C(C=C(C=C2Cl)N3C(=O)NC(=O)C(=N3)C#N)Cl		THRB
(5R)-N-[(2S,3S)-2-(fluoromethyl)-2-hydroxy-5-oxooxolan-3-yl]-3-isoquinolin-1-yl-5-propan-2-yl-4H-1,2-oxazole-5-carboxamide	CC(C)C1(CC(=NO1)C2=NC=CC3=CC=CC=C32)C(=O)NC4CC(=O)OC4(CF)O		CASP1
(5R)-N-[(2S,3S)-2-(fluoromethyl)-2-hydroxy-5-oxooxolan-3-yl]-3-isoquinolin-1-yl-5-propan-2-yl-4H-1,2-oxazole-5-carboxamide	CC(C)C1(CC(=NO1)C2=NC=CC3=CC=CC=C32)C(=O)NC4CC(=O)OC4(CF)O		CASP8
(5R)-N-[(2S,3S)-2-(fluoromethyl)-2-hydroxy-5-oxooxolan-3-yl]-3-isoquinolin-1-yl-5-propan-2-yl-4H-1,2-oxazole-5-carboxamide	CC(C)C1(CC(=NO1)C2=NC=CC3=CC=CC=C32)C(=O)NC4CC(=O)OC4(CF)O		CASP9
1-[3-(6,7-dimethoxyquinazolin-4-yl)oxyphenyl]-3-[5-(1,1,1-trifluoro-2-methylpropan-2-yl)-1,2-oxazol-3-yl]urea	CC(C)(C1=CC(=NO1)NC(=O)NC2=CC(=CC=C2)OC3=NC=NC4=CC(=C(C=C43)OC)OC)C(F)(F)F		BRAF
1-[3-(6,7-dimethoxyquinazolin-4-yl)oxyphenyl]-3-[5-(1,1,1-trifluoro-2-methylpropan-2-yl)-1,2-oxazol-3-yl]urea	CC(C)(C1=CC(=NO1)NC(=O)NC2=CC(=CC=C2)OC3=NC=NC4=CC(=C(C=C43)OC)OC)C(F)(F)F		EGFR
1-[3-(6,7-dimethoxyquinazolin-4-yl)oxyphenyl]-3-[5-(1,1,1-trifluoro-2-methylpropan-2-yl)-1,2-oxazol-3-yl]urea	CC(C)(C1=CC(=NO1)NC(=O)NC2=CC(=CC=C2)OC3=NC=NC4=CC(=C(C=C43)OC)OC)C(F)(F)F		RET
3-(3-fluorophenyl)-2-[(1S)-1-(7H-purin-6-ylamino)propyl]chromen-4-one	CCC(C1=C(C(=O)C2=CC=CC=C2O1)C3=CC(=CC=C3)F)NC4=NC=NC5=C4NC=N5		PIK3CD
3-(3-fluorophenyl)-2-[(1S)-1-(7H-purin-6-ylamino)propyl]chromen-4-one	CCC(C1=C(C(=O)C2=CC=CC=C2O1)C3=CC(=CC=C3)F)NC4=NC=NC5=C4NC=N5		PIK3CG
(2S)-2-[(4R)-2-oxo-4-propylpyrrolidin-1-yl]butanamide	CCCC1CC(=O)N(C1)C(CC)C(=O)N		SV2A
N-[(6-methyl-2-oxo-4-propyl-1H-pyridin-3-yl)methyl]-6-[2-(4-methylpiperazin-1-yl)pyridin-4-yl]-1-propan-2-ylindazole-4-carboxamide	CCCC1=C(C(=O)NC(=C1)C)CNC(=O)C2=C3C=NN(C3=CC(=C2)C4=CC(=NC=C4)N5CCN(CC5)C)C(C)C		EZH2
1-[5-(thiophen-2-ylmethoxy)-1H-indol-3-yl]propan-2-amine	CC(CC1=CNC2=C1C=C(C=C2)OCC3=CC=CS3)N		CXCR4
N-[6-(2-hydroxyethoxy)-5-(2-methoxyphenoxy)-2-[2-(2H-tetrazol-5-yl)pyridin-4-yl]pyrimidin-4-yl]-5-propan-2-ylpyridine-2-sulfonamide	CC(C)C1=CN=C(C=C1)S(=O)(=O)NC2=C(C(=NC(=N2)C3=CC(=NC=C3)C4=NNN=N4)OCCO)OC5=CC=CC=C5OC		EDNRA
N-[6-(2-hydroxyethoxy)-5-(2-methoxyphenoxy)-2-[2-(2H-tetrazol-5-yl)pyridin-4-yl]pyrimidin-4-yl]-5-propan-2-ylpyridine-2-sulfonamide	CC(C)C1=CN=C(C=C1)S(=O)(=O)NC2=C(C(=NC(=N2)C3=CC(=NC=C3)C4=NNN=N4)OCCO)OC5=CC=CC=C5OC		EDNRB
2-[2-[2-(2,6-dichlorophenyl)propan-2-yl]-1-[2-fluoro-4-[3-fluoro-4-(hydroxymethyl)-5-methylsulfonylphenyl]phenyl]imidazol-4-yl]propan-2-ol	CC(C)(C1=CN(C(=N1)C(C)(C)C2=C(C=CC=C2Cl)Cl)C3=C(C=C(C=C3)C4=CC(=C(C(=C4)S(=O)(=O)C)CO)F)F)O		NR1H3
7-[[2-(3-fluoropyridin-2-yl)imidazol-1-yl]methyl]-2-methyl-8-propyl-[1,2,4]triazolo[1,5-c]pyrimidine	CCCC1=C(N=CN2C1=NC(=N2)C)CN3C=CN=C3C4=C(C=CC=N4)F		GABRA2
7-[[2-(3-fluoropyridin-2-yl)imidazol-1-yl]methyl]-2-methyl-8-propyl-[1,2,4]triazolo[1,5-c]pyrimidine	CCCC1=C(N=CN2C1=NC(=N2)C)CN3C=CN=C3C4=C(C=CC=N4)F		GABRA3
7-[[2-(3-fluoropyridin-2-yl)imidazol-1-yl]methyl]-2-methyl-8-propyl-[1,2,4]triazolo[1,5-c]pyrimidine	CCCC1=C(N=CN2C1=NC(=N2)C)CN3C=CN=C3C4=C(C=CC=N4)F		GABRB3
7-[[2-(3-fluoropyridin-2-yl)imidazol-1-yl]methyl]-2-methyl-8-propyl-[1,2,4]triazolo[1,5-c]pyrimidine	CCCC1=C(N=CN2C1=NC(=N2)C)CN3C=CN=C3C4=C(C=CC=N4)F		GABRE
7-[[2-(3-fluoropyridin-2-yl)imidazol-1-yl]methyl]-2-methyl-8-propyl-[1,2,4]triazolo[1,5-c]pyrimidine	CCCC1=C(N=CN2C1=NC(=N2)C)CN3C=CN=C3C4=C(C=CC=N4)F		GABRP
5-(dimethylamino)-9-methyl-2-propylpyrazolo[1,2-a][1,2,4]benzotriazine-1,3-dione	CCCC1C(=O)N2C3=C(C=CC(=C3)C)N=C(N2C1=O)N(C)C		PTGS1
5-(dimethylamino)-9-methyl-2-propylpyrazolo[1,2-a][1,2,4]benzotriazine-1,3-dione	CCCC1C(=O)N2C3=C(C=CC(=C3)C)N=C(N2C1=O)N(C)C		PTGS2
2-[(2S,5R,8S,11S)-5-benzyl-11-[3-(diaminomethylideneamino)propyl]-7-methyl-3,6,9,12,15-pentaoxo-8-propan-2-yl-1,4,7,10,13-pentazacyclopentadec-2-yl]acetic acid	CC(C)C1C(=O)NC(C(=O)NCC(=O)NC(C(=O)NC(C(=O)N1C)CC2=CC=CC=C2)CC(=O)O)CCCN=C(N)N		ITGAV
2-[(2S,5R,8S,11S)-5-benzyl-11-[3-(diaminomethylideneamino)propyl]-7-methyl-3,6,9,12,15-pentaoxo-8-propan-2-yl-1,4,7,10,13-pentazacyclopentadec-2-yl]acetic acid	CC(C)C1C(=O)NC(C(=O)NCC(=O)NC(C(=O)NC(C(=O)N1C)CC2=CC=CC=C2)CC(=O)O)CCCN=C(N)N		ITGB3
2-[(2S,5R,8S,11S)-5-benzyl-11-[3-(diaminomethylideneamino)propyl]-7-methyl-3,6,9,12,15-pentaoxo-8-propan-2-yl-1,4,7,10,13-pentazacyclopentadec-2-yl]acetic acid	CC(C)C1C(=O)NC(C(=O)NCC(=O)NC(C(=O)NC(C(=O)N1C)CC2=CC=CC=C2)CC(=O)O)CCCN=C(N)N		ITGB5
5-(2-hydroxypropyl)-5-prop-2-enyl-1,3-diazinane-2,4,6-trione	CC(CC1(C(=O)NC(=O)NC1=O)CC=C)O		AOC1
5-(2-hydroxypropyl)-5-prop-2-enyl-1,3-diazinane-2,4,6-trione	CC(CC1(C(=O)NC(=O)NC1=O)CC=C)O		MAOA
[(3S)-1-azabicyclo[2.2.2]octan-3-yl] N-[2-[2-(4-fluorophenyl)-1,3-thiazol-4-yl]propan-2-yl]carbamate	CC(C)(C1=CSC(=N1)C2=CC=C(C=C2)F)NC(=O)OC3CN4CCC3CC4		UGCG
5-fluoro-3-phenyl-2-[(1S)-1-(7H-purin-6-ylamino)propyl]quinazolin-4-one	CCC(C1=NC2=C(C(=CC=C2)F)C(=O)N1C3=CC=CC=C3)NC4=NC=NC5=C4NC=N5		PIK3CD
3-[6-(2-hydroxypropan-2-yl)pyridin-3-yl]-5-(4-methoxycyclohexyl)-7,8-dihydropyrazino[2,3-b]pyrazin-6-one	CC(C)(C1=NC=C(C=C1)C2=CN=C3C(=N2)N(C(=O)CN3)C4CCC(CC4)OC)O		MTOR
1,3-thiazol-5-ylmethyl N-[(2S,3S,5S)-3-hydroxy-5-[[(2S)-3-methyl-2-[[methyl-[(2-propan-2-yl-1,3-thiazol-4-yl)methyl]carbamoyl]amino]butanoyl]amino]-1,6-diphenylhexan-2-yl]carbamate	CC(C)C1=NC(=CS1)CN(C)C(=O)NC(C(C)C)C(=O)NC(CC2=CC=CC=C2)CC(C(CC3=CC=CC=C3)NC(=O)OCC4=CN=CS4)O		CYP3A5
1,3-thiazol-5-ylmethyl N-[(2R,5R)-5-[[(2S)-2-[[methyl-[(2-propan-2-yl-1,3-thiazol-4-yl)methyl]carbamoyl]amino]-4-morpholin-4-ylbutanoyl]amino]-1,6-diphenylhexan-2-yl]carbamate	CC(C)C1=NC(=CS1)CN(C)C(=O)NC(CCN2CCOCC2)C(=O)NC(CCC(CC3=CC=CC=C3)NC(=O)OCC4=CN=CS4)CC5=CC=CC=C5		CYP3A5
2-methyl-1-(2-propan-2-ylpyrazolo[1,5-a]pyridin-3-yl)propan-1-one	CC(C)C1=NN2C=CC=CC2=C1C(=O)C(C)C		PDE3A
2-methyl-1-(2-propan-2-ylpyrazolo[1,5-a]pyridin-3-yl)propan-1-one	CC(C)C1=NN2C=CC=CC2=C1C(=O)C(C)C		PDE4B
2-methyl-1-(2-propan-2-ylpyrazolo[1,5-a]pyridin-3-yl)propan-1-one	CC(C)C1=NN2C=CC=CC2=C1C(=O)C(C)C		PDE4C
2-methyl-1-(2-propan-2-ylpyrazolo[1,5-a]pyridin-3-yl)propan-1-one	CC(C)C1=NN2C=CC=CC2=C1C(=O)C(C)C		PDE4D
2-methyl-1-(2-propan-2-ylpyrazolo[1,5-a]pyridin-3-yl)propan-1-one	CC(C)C1=NN2C=CC=CC2=C1C(=O)C(C)C		PDE5A
5-[2-ethoxy-5-(4-methylpiperazin-1-yl)sulfonylphenyl]-1-methyl-3-propyl-6H-pyrazolo[4,3-d]pyrimidin-7-one	CCCC1=NN(C2=C1N=C(NC2=O)C3=C(C=CC(=C3)S(=O)(=O)N4CCN(CC4)C)OCC)C		PDE5A
3-(1-methyl-7-oxo-3-propyl-6H-pyrazolo[4,3-d]pyrimidin-5-yl)-N-[2-(1-methylpyrrolidin-2-yl)ethyl]-4-propoxybenzenesulfonamide	CCCC1=NN(C2=C1N=C(NC2=O)C3=C(C=CC(=C3)S(=O)(=O)NCCC4CCCN4C)OCCC)C		PDE5A
4-N-(5-cyclopropyl-1H-pyrazol-3-yl)-6-(4-methylpiperazin-1-yl)-2-N-[(3-propan-2-yl-1,2-oxazol-5-yl)methyl]pyrimidine-2,4-diamine	CC(C)C1=NOC(=C1)CNC2=NC(=CC(=N2)N3CCN(CC3)C)NC4=NNC(=C4)C5CC5		ABL1
4-N-(5-cyclopropyl-1H-pyrazol-3-yl)-6-(4-methylpiperazin-1-yl)-2-N-[(3-propan-2-yl-1,2-oxazol-5-yl)methyl]pyrimidine-2,4-diamine	CC(C)C1=NOC(=C1)CNC2=NC(=CC(=N2)N3CCN(CC3)C)NC4=NNC(=C4)C5CC5		BLK
4-N-(5-cyclopropyl-1H-pyrazol-3-yl)-6-(4-methylpiperazin-1-yl)-2-N-[(3-propan-2-yl-1,2-oxazol-5-yl)methyl]pyrimidine-2,4-diamine	CC(C)C1=NOC(=C1)CNC2=NC(=CC(=N2)N3CCN(CC3)C)NC4=NNC(=C4)C5CC5		FGFR1
4-N-(5-cyclopropyl-1H-pyrazol-3-yl)-6-(4-methylpiperazin-1-yl)-2-N-[(3-propan-2-yl-1,2-oxazol-5-yl)methyl]pyrimidine-2,4-diamine	CC(C)C1=NOC(=C1)CNC2=NC(=CC(=N2)N3CCN(CC3)C)NC4=NNC(=C4)C5CC5		FGFR2
4-N-(5-cyclopropyl-1H-pyrazol-3-yl)-6-(4-methylpiperazin-1-yl)-2-N-[(3-propan-2-yl-1,2-oxazol-5-yl)methyl]pyrimidine-2,4-diamine	CC(C)C1=NOC(=C1)CNC2=NC(=CC(=N2)N3CCN(CC3)C)NC4=NNC(=C4)C5CC5		FGFR3
4-N-(5-cyclopropyl-1H-pyrazol-3-yl)-6-(4-methylpiperazin-1-yl)-2-N-[(3-propan-2-yl-1,2-oxazol-5-yl)methyl]pyrimidine-2,4-diamine	CC(C)C1=NOC(=C1)CNC2=NC(=CC(=N2)N3CCN(CC3)C)NC4=NNC(=C4)C5CC5		FGR
4-N-(5-cyclopropyl-1H-pyrazol-3-yl)-6-(4-methylpiperazin-1-yl)-2-N-[(3-propan-2-yl-1,2-oxazol-5-yl)methyl]pyrimidine-2,4-diamine	CC(C)C1=NOC(=C1)CNC2=NC(=CC(=N2)N3CCN(CC3)C)NC4=NNC(=C4)C5CC5		FYN
4-N-(5-cyclopropyl-1H-pyrazol-3-yl)-6-(4-methylpiperazin-1-yl)-2-N-[(3-propan-2-yl-1,2-oxazol-5-yl)methyl]pyrimidine-2,4-diamine	CC(C)C1=NOC(=C1)CNC2=NC(=CC(=N2)N3CCN(CC3)C)NC4=NNC(=C4)C5CC5		HCK
4-N-(5-cyclopropyl-1H-pyrazol-3-yl)-6-(4-methylpiperazin-1-yl)-2-N-[(3-propan-2-yl-1,2-oxazol-5-yl)methyl]pyrimidine-2,4-diamine	CC(C)C1=NOC(=C1)CNC2=NC(=CC(=N2)N3CCN(CC3)C)NC4=NNC(=C4)C5CC5		IGF1R
4-N-(5-cyclopropyl-1H-pyrazol-3-yl)-6-(4-methylpiperazin-1-yl)-2-N-[(3-propan-2-yl-1,2-oxazol-5-yl)methyl]pyrimidine-2,4-diamine	CC(C)C1=NOC(=C1)CNC2=NC(=CC(=N2)N3CCN(CC3)C)NC4=NNC(=C4)C5CC5		LCK
4-N-(5-cyclopropyl-1H-pyrazol-3-yl)-6-(4-methylpiperazin-1-yl)-2-N-[(3-propan-2-yl-1,2-oxazol-5-yl)methyl]pyrimidine-2,4-diamine	CC(C)C1=NOC(=C1)CNC2=NC(=CC(=N2)N3CCN(CC3)C)NC4=NNC(=C4)C5CC5		LYN
4-N-(5-cyclopropyl-1H-pyrazol-3-yl)-6-(4-methylpiperazin-1-yl)-2-N-[(3-propan-2-yl-1,2-oxazol-5-yl)methyl]pyrimidine-2,4-diamine	CC(C)C1=NOC(=C1)CNC2=NC(=CC(=N2)N3CCN(CC3)C)NC4=NNC(=C4)C5CC5		SRC
4-N-(5-cyclopropyl-1H-pyrazol-3-yl)-6-(4-methylpiperazin-1-yl)-2-N-[(3-propan-2-yl-1,2-oxazol-5-yl)methyl]pyrimidine-2,4-diamine	CC(C)C1=NOC(=C1)CNC2=NC(=CC(=N2)N3CCN(CC3)C)NC4=NNC(=C4)C5CC5		YES1
(1S,2S,4R,8S,9S,11S,12S,13R)-11-hydroxy-8-(2-hydroxyacetyl)-9,13-dimethyl-6-propyl-5,7-dioxapentacyclo[10.8.0.02,9.04,8.013,18]icosa-14,17-dien-16-one	CCCC1OC2CC3C4CCC5=CC(=O)C=CC5(C4C(CC3(C2(O1)C(=O)CO)C)O)C		NR3C1
8-hydroxy-5-[1-hydroxy-2-(propan-2-ylamino)butyl]-1H-quinolin-2-one	CCC(C(C1=C2C=CC(=O)NC2=C(C=C1)O)O)NC(C)C		ADRB2
(1S)-1-[6,7-bis(difluoromethoxy)naphthalen-2-yl]-2-methyl-1-(2H-triazol-4-yl)propan-1-ol	CC(C)C(C1=CC2=CC(=C(C=C2C=C1)OC(F)F)OC(F)F)(C3=NNN=C3)O		AR
(1R,3R)-5-[(2E)-2-[(1R,3aS,7aR)-1-[(2S)-butan-2-yl]-7a-methyl-2,3,3a,5,6,7-hexahydro-1H-inden-4-ylidene]ethylidene]-2-methylidenecyclohexane-1,3-diol	CCC(C)C1CCC2C1(CCCC2=CC=C3CC(C(=C)C(C3)O)O)C		VDR
4-[3-(3-tert-butyl-4-pyrrolidin-1-ylphenyl)-4-(2-hydroxyethoxy)phenyl]benzoic acid	CC(C)(C)C1=C(C=CC(=C1)C2=C(C=CC(=C2)C3=CC=C(C=C3)C(=O)O)OCCO)N4CCCC4		RARG
2-[4-[(Z)-1,2-diphenylbut-1-enyl]phenoxy]-N,N-dimethylethanamine	CCC(=C(C1=CC=CC=C1)C2=CC=C(C=C2)OCCN(C)C)C3=CC=CC=C3		ESR1
4-[2-(difluoromethyl)benzimidazol-1-yl]-N-[2-methyl-1-[2-(1-methylpiperidin-4-yl)phenyl]propan-2-yl]-6-morpholin-4-yl-1,3,5-triazin-2-amine	CC(C)(CC1=CC=CC=C1C2CCN(CC2)C)NC3=NC(=NC(=N3)N4CCOCC4)N5C6=CC=CC=C6N=C5C(F)F		PIK3CD
1-(4-tert-butylphenyl)-4-[4-[hydroxy(diphenyl)methyl]piperidin-1-yl]butan-1-ol	CC(C)(C)C1=CC=C(C=C1)C(CCCN2CCC(CC2)C(C3=CC=CC=C3)(C4=CC=CC=C4)O)O		HRH1
(2S)-2-[4-(2-methylpropyl)phenyl]propanoic acid	CC(C)CC1=CC=C(C=C1)C(C)C(=O)O		PTGS1
(2S)-2-[4-(2-methylpropyl)phenyl]propanoic acid	CC(C)CC1=CC=C(C=C1)C(C)C(=O)O		PTGS2
(E)-3-[4-[(E)-2-(2-chloro-4-fluorophenyl)-1-(1H-indazol-5-yl)but-1-enyl]phenyl]prop-2-enoic acid	CCC(=C(C1=CC=C(C=C1)C=CC(=O)O)C2=CC3=C(C=C2)NN=C3)C4=C(C=C(C=C4)F)Cl		ESR1
2-[3-[2-[[(2R)-2-hydroxy-2-[4-hydroxy-3-(methanesulfonamido)phenyl]ethyl]amino]-2-methylpropyl]phenyl]-N-[[3-(4-hydroxyphenyl)phenyl]methyl]acetamide	CC(C)(CC1=CC=CC(=C1)CC(=O)NCC2=CC(=CC=C2)C3=CC=C(C=C3)O)NCC(C4=CC(=C(C=C4)O)NS(=O)(=O)C)O		ADRB2
2-[4-(2-methylpropyl)phenyl]acetic acid	CC(C)CC1=CC=C(C=C1)CC(=O)O		PTGS1
2-[4-(2-methylpropyl)phenyl]acetic acid	CC(C)CC1=CC=C(C=C1)CC(=O)O		PTGS2
N-[(2S,3S)-4-(4-chlorophenyl)-3-(3-cyanophenyl)butan-2-yl]-2-methyl-2-[5-(trifluoromethyl)pyridin-2-yl]oxypropanamide	CC(C(CC1=CC=C(C=C1)Cl)C2=CC=CC(=C2)C#N)NC(=O)C(C)(C)OC3=NC=C(C=C3)C(F)(F)F		CNR1
2-[3-[[(4-tert-butylphenyl)methyl-pyridin-3-ylsulfonylamino]methyl]phenoxy]acetic acid	CC(C)(C)C1=CC=C(C=C1)CN(CC2=CC(=CC=C2)OCC(=O)O)S(=O)(=O)C3=CN=CC=C3		PTGER2
4-(4-benzhydryloxypiperidin-1-yl)-1-(4-tert-butylphenyl)butan-1-one	CC(C)(C)C1=CC=C(C=C1)C(=O)CCCN2CCC(CC2)OC(C3=CC=CC=C3)C4=CC=CC=C4		HRH1
N,2-dimethyl-1-phenylpropan-2-amine	CC(C)(CC1=CC=CC=C1)NC		ADRA1B
N,2-dimethyl-1-phenylpropan-2-amine	CC(C)(CC1=CC=CC=C1)NC		ADRA2C
N,2-dimethyl-1-phenylpropan-2-amine	CC(C)(CC1=CC=CC=C1)NC		ADRB2
N-(2,4-ditert-butyl-5-hydroxyphenyl)-4-oxo-1H-quinoline-3-carboxamide	CC(C)(C)C1=CC(=C(C=C1NC(=O)C2=CNC3=CC=CC=C3C2=O)O)C(C)(C)C		CFTR
4-[(Z)-1-[4-[2-(methylamino)ethoxy]phenyl]-2-phenylbut-1-enyl]phenol	CCC(=C(C1=CC=C(C=C1)O)C2=CC=C(C=C2)OCCNC)C3=CC=CC=C3		ESR1
4-[1-[4-[2-(dimethylamino)ethoxy]phenyl]-2-phenylbut-1-enyl]phenol	CCC(=C(C1=CC=C(C=C1)O)C2=CC=C(C=C2)OCCN(C)C)C3=CC=CC=C3		ESR1
6-[4-[2-[[(2S)-3-(9H-carbazol-4-yloxy)-2-hydroxypropyl]amino]-2-methylpropyl]phenoxy]pyridine-3-carboxamide	CC(C)(CC1=CC=C(C=C1)OC2=NC=C(C=C2)C(=O)N)NCC(COC3=CC=CC4=C3C5=CC=CC=C5N4)O		ADRB2
2,6-ditert-butyl-4-[2-(3,5-ditert-butyl-4-hydroxyphenyl)sulfanylpropan-2-ylsulfanyl]phenol	CC(C)(C)C1=CC(=CC(=C1O)C(C)(C)C)SC(C)(C)SC2=CC(=C(C(=C2)C(C)(C)C)O)C(C)(C)C		ABCA1
1-[2-[4-[(E)-1-(4-iodophenyl)-2-phenylbut-1-enyl]phenoxy]ethyl]pyrrolidine	CCC(=C(C1=CC=C(C=C1)OCCN2CCCC2)C3=CC=C(C=C3)I)C4=CC=CC=C4		ESR1
3-[(E)-1-[4-[2-(dimethylamino)ethoxy]phenyl]-2-phenylbut-1-enyl]phenol	CCC(=C(C1=CC=C(C=C1)OCCN(C)C)C2=CC(=CC=C2)O)C3=CC=CC=C3		ESR1
4-tert-butyl-N-[6-(2-hydroxyethoxy)-5-(2-methoxyphenoxy)-2-pyrimidin-2-ylpyrimidin-4-yl]benzenesulfonamide	CC(C)(C)C1=CC=C(C=C1)S(=O)(=O)NC2=C(C(=NC(=N2)C3=NC=CC=N3)OCCO)OC4=CC=CC=C4OC		EDNRA
[truncated: 1,718 more rows]

## Sheet: Supplementary Table 2.
Supplimentary Table 2. The targeted gene information for the 52 GDSC validation drugs
Drug Names	Putative Target	Pathway Names
PF-562271	PTK, PTK2B	Cytoskeleton
QUIZARTINIB	FLT3	RTK signaling
FORETINIB	MET	RTK signaling
DABRAFENIB	BRAF	ERK MAPK signaling
SELUMETINIB	MEK1, MEK2	ERK MAPK signaling
MASITINIB	KIT, PDGFRA, PDGFRB	RTK signaling
FR-180204	ERK1, ERK2	ERK MAPK signaling
GEFITINIB	EGFR	EGFR signaling
AXITINIB	PDGFR, KIT, VEGFR	RTK signaling
PALBOCICLIB	CDK4, CDK6	Cell cycle
AFATINIB	ERBB2, EGFR	EGFR signaling
JW-7-24-1	LCK	Other, kinases
OSIMERTINIB	EGFR	EGFR signaling
DASATINIB	ABL, SRC, Ephrins, PDGFR, KIT	Other, kinases
BOSUTINIB	SRC, ABL, TEC	Other, kinases
KU-55933	ATM	Genome integrity
PONATINIB	SRC	Other, kinases
CCT007093	PPM1D	Cell cycle
WZ4003	NUAK1, NUAK2	Other, kinases
TAMOXIFEN	ESR1	Hormone-related
IBRUTINIB	BTK	Other, kinases
AZD3759	EGFR	EGFR signaling
QL-XI-92	DDR1	Cytoskeleton
LESTAURTINIB	FLT3, JAK2, NTRK1, NTRK2, NTRK3	Other, kinases
AZD6738	ATR	Genome integrity
CAMPTOTHECIN	TOP1	DNA replication
PRT062607	SYK	Other, kinases
OSIMERTINIB	EGFR	EGFR signaling
IPA-3	PAK1	Cytoskeleton
AFATINIB	ERBB2, EGFR	EGFR signaling
VE-822	ATR	Genome integrity
PFI-1	BRD4	Chromatin other
PAZOPANIB	CSF1R, KIT, PDGFRA, PDGFRB	RTK signaling
QL-X-138	BTK	Other, kinases
OSI-930	KIT	RTK signaling
VISMODEGIB	SMO	Other
AMUVATINIB	KIT, PDGFRA, FLT3	RTK signaling
AZD4547	FGFR1, FGFR2, FGFR3	RTK signaling
GW-2580	CSF1R	RTK signaling
LFM-A13	BTK	Other, kinases
MIRA-1	TP53	p53 pathway
CP466722	ATM	Genome integrity
SAVOLITINIB	MET	RTK signaling
SN-38	TOP1	DNA replication
GSK690693	AKT1, AKT2, AKT3	PI3K/MTOR signaling
RUXOLITINIB	JAK1, JAK2	Other, kinases
ALECTINIB	ALK	RTK signaling
PELITINIB	EGFR	EGFR signaling
AZ960	JAK2, JAK3	Other, kinases
AST-1306	EGFR, ERBB4	RTK signaling
SERDEMETAN	MDM2	p53 pathway
PHA-665752	MET	RTK signaling

## Sheet: Supplementary Table 3
Supplimentary Table 3. CCLE 471 Cancer Cell Line Names
'22RV1_PROSTATE',
'42MGBA_CENTRAL_NERVOUS_SYSTEM',
'5637_URINARY_TRACT',
'639V_URINARY_TRACT',
'697_HAEMATOPOIETIC_AND_LYMPHOID_TISSUE',
'769P_KIDNEY',
'786O_KIDNEY',
'8305C_THYROID',
'8505C_THYROID',
'8MGBA_CENTRAL_NERVOUS_SYSTEM',
'A172_CENTRAL_NERVOUS_SYSTEM',
'A204_SOFT_TISSUE',
'A2058_SKIN',
'A253_SALIVARY_GLAND',
'A2780_OVARY',
'A375_SKIN',
'A549_LUNG',
'A673_BONE',
'ACHN_KIDNEY',
'ALLSIL_HAEMATOPOIETIC_AND_LYMPHOID_TISSUE',
'AMO1_HAEMATOPOIETIC_AND_LYMPHOID_TISSUE',
'AN3CA_ENDOMETRIUM',
'ASPC1_PANCREAS',
'AU565_BREAST',
'BCPAP_THYROID',
'BDCM_HAEMATOPOIETIC_AND_LYMPHOID_TISSUE',
'BFTC909_KIDNEY',
'BL41_HAEMATOPOIETIC_AND_LYMPHOID_TISSUE',
'BL70_HAEMATOPOIETIC_AND_LYMPHOID_TISSUE',
'BT20_BREAST',
'BT474_BREAST',
'BT549_BREAST',
'BXPC3_PANCREAS',
'C2BBE1_LARGE_INTESTINE',
'C32_SKIN',
'CAKI2_KIDNEY',
'CAL12T_LUNG',
'CAL27_UPPER_AERODIGESTIVE_TRACT',
'CAL78_BONE',
'CAL851_BREAST',
'CALU1_LUNG',
'CALU3_LUNG',
'CALU6_LUNG',
'CAMA1_BREAST',
'CAPAN2_PANCREAS',
'CAS1_CENTRAL_NERVOUS_SYSTEM',
'CCK81_LARGE_INTESTINE',
'CHP212_AUTONOMIC_GANGLIA',
'CI1_HAEMATOPOIETIC_AND_LYMPHOID_TISSUE',
'COLO201_LARGE_INTESTINE',
'COLO320_LARGE_INTESTINE',
'COLO678_LARGE_INTESTINE',
'COLO679_SKIN',
'COLO699_LUNG',
'COLO741_SKIN',
'CORL105_LUNG',
'CORL23_LUNG',
'COV318_OVARY',
'COV504_OVARY',
'DAOY_CENTRAL_NERVOUS_SYSTEM',
'DBTRG05MG_CENTRAL_NERVOUS_SYSTEM',
'DEL_HAEMATOPOIETIC_AND_LYMPHOID_TISSUE',
'DETROIT562_UPPER_AERODIGESTIVE_TRACT',
'DKMG_CENTRAL_NERVOUS_SYSTEM',
'DMS114_LUNG',
'DOHH2_HAEMATOPOIETIC_AND_LYMPHOID_TISSUE',
'DU145_PROSTATE',
'DV90_LUNG',
'EB1_HAEMATOPOIETIC_AND_LYMPHOID_TISSUE',
'EBC1_LUNG',
'EFE184_ENDOMETRIUM',
'EFM19_BREAST',
'EFO21_OVARY',
'EFO27_OVARY',
'EM2_HAEMATOPOIETIC_AND_LYMPHOID_TISSUE',
'EN_ENDOMETRIUM',
'ES2_OVARY',
'ESS1_ENDOMETRIUM',
'F36P_HAEMATOPOIETIC_AND_LYMPHOID_TISSUE',
'FADU_UPPER_AERODIGESTIVE_TRACT',
'FU97_STOMACH',
'FUOV1_OVARY',
'G361_SKIN',
'G401_SOFT_TISSUE',
'G402_SOFT_TISSUE',
'GAMG_CENTRAL_NERVOUS_SYSTEM',
'GB1_CENTRAL_NERVOUS_SYSTEM',
'GCIY_STOMACH',
'GCT_SOFT_TISSUE',
'GI1_CENTRAL_NERVOUS_SYSTEM',
'GMS10_CENTRAL_NERVOUS_SYSTEM',
'GRANTA519_HAEMATOPOIETIC_AND_LYMPHOID_TISSUE',
'H4_CENTRAL_NERVOUS_SYSTEM',
'HARA_LUNG',
'HCC1187_BREAST',
'HCC1395_BREAST',
'HCC15_LUNG',
'HCC1569_BREAST',
'HCC1806_BREAST',
'HCC1954_BREAST',
'HCC2935_LUNG',
'HCC4006_LUNG',
'HCC44_LUNG',
'HCC56_LARGE_INTESTINE',
'HCC70_BREAST',
'HCC78_LUNG',
'HCC827_LUNG',
'HCT116_LARGE_INTESTINE',
'HCT15_LARGE_INTESTINE',
'HDMYZ_HAEMATOPOIETIC_AND_LYMPHOID_TISSUE',
'HDQP1_BREAST',
'HEC151_ENDOMETRIUM',
'HEC1A_ENDOMETRIUM',
'HEC1B_ENDOMETRIUM',
'HEC251_ENDOMETRIUM',
'HEC265_ENDOMETRIUM',
'HEC59_ENDOMETRIUM',
'HEC6_ENDOMETRIUM',
'HEL9217_HAEMATOPOIETIC_AND_LYMPHOID_TISSUE',
'HEP3B217_LIVER',
'HEPG2_LIVER',
'HEYA8_OVARY',
'HGC27_STOMACH',
'HH_HAEMATOPOIETIC_AND_LYMPHOID_TISSUE',
'HLF_LIVER',
'HMC18_BREAST',
'HMCB_SKIN',
'HOS_BONE',
'HPAC_PANCREAS',
'HPAFII_PANCREAS',
'HS294T_SKIN',
'HS578T_BREAST',
'HS683_CENTRAL_NERVOUS_SYSTEM',
'HS695T_SKIN',
'HS729_SOFT_TISSUE',
'HS746T_STOMACH',
'HS766T_PANCREAS',
'HS852T_SKIN',
'HS936T_SKIN',
'HS939T_SKIN',
'HS944T_SKIN',
'HSC2_UPPER_AERODIGESTIVE_TRACT',
'HT_HAEMATOPOIETIC_AND_LYMPHOID_TISSUE',
'HT1080_SOFT_TISSUE',
'HT1197_URINARY_TRACT',
'HT1376_URINARY_TRACT',
'HT144_SKIN',
'HT29_LARGE_INTESTINE',
'HUCCT1_BILIARY_TRACT',
'HUH1_LIVER',
'HUPT3_PANCREAS',
'HUPT4_PANCREAS',
'HUT78_HAEMATOPOIETIC_AND_LYMPHOID_TISSUE',
'IALM_LUNG',
'IGR37_SKIN',
'IGR39_SKIN',
'IGROV1_OVARY',
'IM95_STOMACH',
'IMR32_AUTONOMIC_GANGLIA',
'IPC298_SKIN',
'ISHIKAWAHERAKLIO02ER_ENDOMETRIUM',
'ISTMES1_PLEURA',
'ISTMES2_PLEURA',
'J82_URINARY_TRACT',
'JHH2_LIVER',
'JHH4_LIVER',
'JHH5_LIVER',
'JHH6_LIVER',
'JHH7_LIVER',
'JHOS2_OVARY',
'JHOS4_OVARY',
'JHUEM2_ENDOMETRIUM',
'JM1_HAEMATOPOIETIC_AND_LYMPHOID_TISSUE',
'JMSU1_URINARY_TRACT',
'JURKAT_HAEMATOPOIETIC_AND_LYMPHOID_TISSUE',
'JVM3_HAEMATOPOIETIC_AND_LYMPHOID_TISSUE',
'K029AX_SKIN',
'KALS1_CENTRAL_NERVOUS_SYSTEM',
'KARPAS299_HAEMATOPOIETIC_AND_LYMPHOID_TISSUE',
'KARPAS422_HAEMATOPOIETIC_AND_LYMPHOID_TISSUE',
'KARPAS620_HAEMATOPOIETIC_AND_LYMPHOID_TISSUE',
'KASUMI2_HAEMATOPOIETIC_AND_LYMPHOID_TISSUE',
'KCL22_HAEMATOPOIETIC_AND_LYMPHOID_TISSUE',
'KE39_STOMACH',
'KELLY_AUTONOMIC_GANGLIA',
'KG1_HAEMATOPOIETIC_AND_LYMPHOID_TISSUE',
'KHM1B_HAEMATOPOIETIC_AND_LYMPHOID_TISSUE',
'KLE_ENDOMETRIUM',
'KMBC2_URINARY_TRACT',
'KMM1_HAEMATOPOIETIC_AND_LYMPHOID_TISSUE',
'KMRC1_KIDNEY',
'KMRC2_KIDNEY',
'KMS11_HAEMATOPOIETIC_AND_LYMPHOID_TISSUE',
'KMS12BM_HAEMATOPOIETIC_AND_LYMPHOID_TISSUE',
'KMS26_HAEMATOPOIETIC_AND_LYMPHOID_TISSUE',
'KMS34_HAEMATOPOIETIC_AND_LYMPHOID_TISSUE',
'KNS42_CENTRAL_NERVOUS_SYSTEM',
'KNS60_CENTRAL_NERVOUS_SYSTEM',
'KNS62_LUNG',
'KNS81_CENTRAL_NERVOUS_SYSTEM',
'KO52_HAEMATOPOIETIC_AND_LYMPHOID_TISSUE',
'KP2_PANCREAS',
'KP3_PANCREAS',
'KP4_PANCREAS',
'KPNSI9S_AUTONOMIC_GANGLIA',
'KU812_HAEMATOPOIETIC_AND_LYMPHOID_TISSUE',
'KURAMOCHI_OVARY',
'KYM1_SOFT_TISSUE',
'KYSE140_OESOPHAGUS',
'KYSE150_OESOPHAGUS',
'KYSE180_OESOPHAGUS',
'KYSE30_OESOPHAGUS',
'KYSE410_OESOPHAGUS',
'KYSE450_OESOPHAGUS',
'KYSE510_OESOPHAGUS',
'KYSE520_OESOPHAGUS',
'KYSE70_OESOPHAGUS',
'L33_PANCREAS',
'L363_HAEMATOPOIETIC_AND_LYMPHOID_TISSUE',
'L428_HAEMATOPOIETIC_AND_LYMPHOID_TISSUE',
'LCLC103H_LUNG',
'LN18_CENTRAL_NERVOUS_SYSTEM',
'LN229_CENTRAL_NERVOUS_SYSTEM',
'LOUNH91_LUNG',
'LOXIMVI_SKIN',
'LP1_HAEMATOPOIETIC_AND_LYMPHOID_TISSUE',
'LS123_LARGE_INTESTINE',
'LS411N_LARGE_INTESTINE',
'LS513_LARGE_INTESTINE',
'LU99_LUNG',
'LUDLU1_LUNG',
'MALME3M_SKIN',
'MC116_HAEMATOPOIETIC_AND_LYMPHOID_TISSUE',
'MCAS_OVARY',
'MCF7_BREAST',
'MDAMB157_BREAST',
'MDAMB175VII_BREAST',
'MDAMB415_BREAST',
'MDAMB435S_SKIN',
'MDAMB436_BREAST',
'MDAMB453_BREAST',
'MDAMB468_BREAST',
'MEC1_HAEMATOPOIETIC_AND_LYMPHOID_TISSUE',
'MEG01_HAEMATOPOIETIC_AND_LYMPHOID_TISSUE',
'MELHO_SKIN',
'MESSA_SOFT_TISSUE',
'MEWO_SKIN',
'MFE280_ENDOMETRIUM',
'MFE296_ENDOMETRIUM',
'MFE319_ENDOMETRIUM',
'MG63_BONE',
'MHHES1_BONE',
'MIAPACA2_PANCREAS',
'MINO_HAEMATOPOIETIC_AND_LYMPHOID_TISSUE',
'MJ_HAEMATOPOIETIC_AND_LYMPHOID_TISSUE',
'MKN45_STOMACH',
'MKN7_STOMACH',
'MKN74_STOMACH',
'MOLP8_HAEMATOPOIETIC_AND_LYMPHOID_TISSUE',
'MOLT16_HAEMATOPOIETIC_AND_LYMPHOID_TISSUE',
'MONOMAC1_HAEMATOPOIETIC_AND_LYMPHOID_TISSUE',
'MORCPR_LUNG',
'MPP89_PLEURA',
'MSTO211H_PLEURA',
'NCIH1048_LUNG',
'NCIH1092_LUNG',
'NCIH1155_LUNG',
'NCIH1184_LUNG',
'NCIH1299_LUNG',
'NCIH1339_LUNG',
'NCIH1341_LUNG',
'NCIH1355_LUNG',
'NCIH1373_LUNG',
'NCIH1563_LUNG',
'NCIH1568_LUNG',
'NCIH1573_LUNG',
'NCIH1581_LUNG',
'NCIH1648_LUNG',
'NCIH1650_LUNG',
'NCIH1651_LUNG',
'NCIH1666_LUNG',
'NCIH1693_LUNG',
'NCIH1694_LUNG',
'NCIH1703_LUNG',
'NCIH1792_LUNG',
'NCIH1793_LUNG',
'NCIH1869_LUNG',
'NCIH1915_LUNG',
'NCIH1944_LUNG',
'NCIH1975_LUNG',
'NCIH2009_LUNG',
'NCIH2023_LUNG',
'NCIH2030_LUNG',
'NCIH2052_PLEURA',
'NCIH2085_LUNG',
'NCIH2087_LUNG',
'NCIH211_LUNG',
'NCIH2122_LUNG',
'NCIH2170_LUNG',
'NCIH2172_LUNG',
'NCIH2228_LUNG',
'NCIH226_LUNG',
'NCIH2286_LUNG',
'NCIH23_LUNG',
'NCIH2444_LUNG',
'NCIH2452_PLEURA',
'NCIH28_PLEURA',
'NCIH322_LUNG',
'NCIH3255_LUNG',
'NCIH358_LUNG',
'NCIH441_LUNG',
'NCIH460_LUNG',
'NCIH520_LUNG',
'NCIH522_LUNG',
'NCIH647_LUNG',
'NCIH650_LUNG',
'NCIH661_LUNG',
'NCIH727_LUNG',
'NCIH747_LARGE_INTESTINE',
'NCIH810_LUNG',
'NCIN87_STOMACH',
'NCO2_HAEMATOPOIETIC_AND_LYMPHOID_TISSUE',
'NIHOVCAR3_OVARY',
'NUGC3_STOMACH',
'NUGC4_STOMACH',
'OC314_OVARY',
'OC316_OVARY',
'OCIAML2_HAEMATOPOIETIC_AND_LYMPHOID_TISSUE',
'OCIAML5_HAEMATOPOIETIC_AND_LYMPHOID_TISSUE',
'OCUM1_STOMACH',
'OE21_OESOPHAGUS',
'OE33_OESOPHAGUS',
'ONCODG1_OVARY',
'ONS76_CENTRAL_NERVOUS_SYSTEM',
'OPM2_HAEMATOPOIETIC_AND_LYMPHOID_TISSUE',
'OV90_OVARY',
'OVCAR4_OVARY',
'OVCAR8_OVARY',
'OVMANA_OVARY',
'OVSAHO_OVARY',
'OVTOKO_OVARY',
'P12ICHIKAWA_HAEMATOPOIETIC_AND_LYMPHOID_TISSUE',
'P31FUJ_HAEMATOPOIETIC_AND_LYMPHOID_TISSUE',
'P3HR1_HAEMATOPOIETIC_AND_LYMPHOID_TISSUE',
'PANC0203_PANCREAS',
'PANC0327_PANCREAS',
'PANC0403_PANCREAS',
'PANC1005_PANCREAS',
'PATU8902_PANCREAS',
'PC14_LUNG',
'PC3_PROSTATE',
'PFEIFFER_HAEMATOPOIETIC_AND_LYMPHOID_TISSUE',
'PK1_PANCREAS',
'PK45H_PANCREAS',
'PK59_PANCREAS',
'PLCPRF5_LIVER',
'PSN1_PANCREAS',
'QGP1_PANCREAS',
'RAJI_HAEMATOPOIETIC_AND_LYMPHOID_TISSUE',
'RD_SOFT_TISSUE',
'REH_HAEMATOPOIETIC_AND_LYMPHOID_TISSUE',
'RERFGC1B_STOMACH',
'RERFLCAI_LUNG',
'RERFLCMS_LUNG',
'RKO_LARGE_INTESTINE',
'RL952_ENDOMETRIUM',
'RPMI7951_SKIN',
'RPMI8402_HAEMATOPOIETIC_AND_LYMPHOID_TISSUE',
'RT112_URINARY_TRACT',
'RT4_URINARY_TRACT',
'RVH421_SKIN',
'SAOS2_BONE',
'SBC5_LUNG',
'SCABER_URINARY_TRACT',
'SCC25_UPPER_AERODIGESTIVE_TRACT',
'SCC9_UPPER_AERODIGESTIVE_TRACT',
'SF126_CENTRAL_NERVOUS_SYSTEM',
'SF295_CENTRAL_NERVOUS_SYSTEM',
'SH10TC_STOMACH',
'SHP77_LUNG',
'SIGM5_HAEMATOPOIETIC_AND_LYMPHOID_TISSUE',
'SIMA_AUTONOMIC_GANGLIA',
'SJSA1_BONE',
'SKBR3_BREAST',
'SKCO1_LARGE_INTESTINE',
'SKES1_BONE',
'SKHEP1_LIVER',
'SKLMS1_SOFT_TISSUE',
'SKLU1_LUNG',
'SKMEL24_SKIN',
'SKMEL30_SKIN',
'SKMEL31_SKIN',
'SKMEL5_SKIN',
'SKMES1_LUNG',
'SKMM2_HAEMATOPOIETIC_AND_LYMPHOID_TISSUE',
'SKNAS_AUTONOMIC_GANGLIA',
'SKNBE2_AUTONOMIC_GANGLIA',
'SKNDZ_AUTONOMIC_GANGLIA',
'SKNFI_AUTONOMIC_GANGLIA',
'SKNSH_AUTONOMIC_GANGLIA',
'SKOV3_OVARY',
'SNGM_ENDOMETRIUM',
'SNU1_STOMACH',
'SNU16_STOMACH',
'SNU182_LIVER',
'SNU387_LIVER',
'SNU398_LIVER',
'SNU423_LIVER',
'SNU449_LIVER',
'SNU475_LIVER',
'SNUC2A_LARGE_INTESTINE',
'SQ1_LUNG',
'SU8686_PANCREAS',
'SUDHL10_HAEMATOPOIETIC_AND_LYMPHOID_TISSUE',
'SUDHL4_HAEMATOPOIETIC_AND_LYMPHOID_TISSUE',
'SUDHL6_HAEMATOPOIETIC_AND_LYMPHOID_TISSUE',
'SUDHL8_HAEMATOPOIETIC_AND_LYMPHOID_TISSUE',
'SUIT2_PANCREAS',
'SUPM2_HAEMATOPOIETIC_AND_LYMPHOID_TISSUE',
'SUPT1_HAEMATOPOIETIC_AND_LYMPHOID_TISSUE',
'SW1088_CENTRAL_NERVOUS_SYSTEM',
'SW1271_LUNG',
'SW1353_BONE',
'SW1417_LARGE_INTESTINE',
'SW1573_LUNG',
'SW1990_PANCREAS',
'SW403_LARGE_INTESTINE',
'SW48_LARGE_INTESTINE',
'SW480_LARGE_INTESTINE',
'SW579_THYROID',
'SW620_LARGE_INTESTINE',
'SW780_URINARY_TRACT',
'SW900_LUNG',
'T24_URINARY_TRACT',
'T3M10_LUNG',
'T47D_BREAST',
'T84_LARGE_INTESTINE',
'T98G_CENTRAL_NERVOUS_SYSTEM',
'TC71_BONE',
'TCCSUP_URINARY_TRACT',
'TE1_OESOPHAGUS',
'TE11_OESOPHAGUS',
'TE15_OESOPHAGUS',
'TE5_OESOPHAGUS',
'TE617T_SOFT_TISSUE',
'TE9_OESOPHAGUS',
'TEN_ENDOMETRIUM',
'TOLEDO_HAEMATOPOIETIC_AND_LYMPHOID_TISSUE',
'TOV112D_OVARY',
'TOV21G_OVARY',
'TT2609C02_THYROID',
'TYKNU_OVARY',
'U118MG_CENTRAL_NERVOUS_SYSTEM',
'U2OS_BONE',
'U87MG_CENTRAL_NERVOUS_SYSTEM',
'U937_HAEMATOPOIETIC_AND_LYMPHOID_TISSUE',
'UACC257_SKIN',
'UACC62_SKIN',
'UACC812_BREAST',
'UMUC3_URINARY_TRACT',
'VMRCRCW_KIDNEY',
'VMRCRCZ_KIDNEY',
'WM115_SKIN',
'WM1799_SKIN',
'WM2664_SKIN',
'WM793_SKIN',
'WM88_SKIN',
'WM983B_SKIN',
'YKG1_CENTRAL_NERVOUS_SYSTEM',
'ZR751_BREAST',
'ZR7530_BREAST'

## Sheet: Supplementary Table 4
Supplimentary Table 4. Validation Cancer Cell Line Names
'JAR_PLACENTA',
'DOTC24510_CERVIX',
'PC14_LUNG',
'COLO829_SKIN',
'PL21_HAEMATOPOIETIC_AND_LYMPHOID_TISSUE',
'SKLMS1_SOFT_TISSUE',
'SKPNDW_BONE',
'NCIH82_LUNG',
'CAL120_BREAST',
'TOV112D_OVARY',
'SW1463_LARGE_INTESTINE',
'MFE280_ENDOMETRIUM',
'DND41_HAEMATOPOIETIC_AND_LYMPHOID_TISSUE',
'AMO1_HAEMATOPOIETIC_AND_LYMPHOID_TISSUE',
'AM38_CENTRAL_NERVOUS_SYSTEM',
'ST486_HAEMATOPOIETIC_AND_LYMPHOID_TISSUE',
'DANG_PANCREAS',
'NCIH596_LUNG',
'NCIH69_LUNG',
'647V_URINARY_TRACT',
'EOL1_HAEMATOPOIETIC_AND_LYMPHOID_TISSUE',
'NCIH2122_LUNG',
'EJM_HAEMATOPOIETIC_AND_LYMPHOID_TISSUE',
'LAMA84_HAEMATOPOIETIC_AND_LYMPHOID_TISSUE',
'MKN7_STOMACH',
'OV90_OVARY',
'DU4475_BREAST',
'BEN_LUNG',
'NCIH2291_LUNG',
'CAL54_KIDNEY',
'P12ICHIKAWA_HAEMATOPOIETIC_AND_LYMPHOID_TISSUE',
'KU812_HAEMATOPOIETIC_AND_LYMPHOID_TISSUE',
'NCIH1869_LUNG',
'OCIAML5_HAEMATOPOIETIC_AND_LYMPHOID_TISSUE',
'HCC1806_BREAST',
'GIMEN_AUTONOMIC_GANGLIA',
'SR786_HAEMATOPOIETIC_AND_LYMPHOID_TISSUE',
'OVISE_OVARY',
'NCIH1963_LUNG',
'LCLC103H_LUNG',
'UACC257_SKIN',
'RD_SOFT_TISSUE',
'UO31_KIDNEY',
'COLO800_SKIN',
'TE4_OESOPHAGUS',
'CAL51_BREAST',
'FADU_UPPER_AERODIGESTIVE_TRACT',
'TOV21G_OVARY',
'CADOES1_BONE',
'SW48_LARGE_INTESTINE',
'L363_HAEMATOPOIETIC_AND_LYMPHOID_TISSUE',
'A204_SOFT_TISSUE',
'C33A_CERVIX',
'GMS10_CENTRAL_NERVOUS_SYSTEM',
'RCM1_LARGE_INTESTINE',
'EFM192A_BREAST',
'SNU387_LIVER',
'NUGC3_STOMACH',
'NCIH647_LUNG',
'FLO1_OESOPHAGUS',
'SNU61_LARGE_INTESTINE',
'KP3_PANCREAS',
'CORL88_LUNG',
'YAPC_PANCREAS',
'A2058_SKIN',
'SW1710_URINARY_TRACT',
'BXPC3_PANCREAS',
'DMS79_LUNG',
'GB1_CENTRAL_NERVOUS_SYSTEM',
'NCIH1975_LUNG',
'NCIH838_LUNG',
'L428_HAEMATOPOIETIC_AND_LYMPHOID_TISSUE',
'ALLSIL_HAEMATOPOIETIC_AND_LYMPHOID_TISSUE',
'HUPT4_PANCREAS',
'NCIH1838_LUNG',
'SKMEL3_SKIN',
'KE37_HAEMATOPOIETIC_AND_LYMPHOID_TISSUE',
'SIMA_AUTONOMIC_GANGLIA',
'CAKI1_KIDNEY',
'SKUT1_SOFT_TISSUE',
'PATU8902_PANCREAS',
'NCIH1563_LUNG',
'HCC33_LUNG',
'MCF7_BREAST',
'L540_HAEMATOPOIETIC_AND_LYMPHOID_TISSUE',
'8MGBA_CENTRAL_NERVOUS_SYSTEM',
'CAS1_CENTRAL_NERVOUS_SYSTEM',
'RERFLCSQ1_LUNG',
'NALM6_HAEMATOPOIETIC_AND_LYMPHOID_TISSUE',
'TYKNU_OVARY',
'MONOMAC6_HAEMATOPOIETIC_AND_LYMPHOID_TISSUE',
'OVTOKO_OVARY',
'JHH2_LIVER',
'PSN1_PANCREAS',
'PA1_OVARY',
'SKNDZ_AUTONOMIC_GANGLIA',
'NCIH2227_LUNG',
'KYSE140_OESOPHAGUS',
'HDMYZ_HAEMATOPOIETIC_AND_LYMPHOID_TISSUE'

## Sheet: Supplementary Table 5
Supplimentary Table 4. Gene Names With The Corresponding Gene Ensemble IDs For MIDI Training
Gene_name	Ensemble_ID	Token_ID_Geneformer
A1BG	ENSG00000121410	5150
A1CF	ENSG00000148584	9064
A2M	ENSG00000175899	13826
A4GALT	ENSG00000128274	5973
AADAC	ENSG00000114771	4317
AADAT	ENSG00000109576	3671
AASS	ENSG00000008311	216
AATK	ENSG00000181409	14708
ABAT	ENSG00000183044	15020
ABCA1	ENSG00000165029	11436
ABCA2	ENSG00000107331	3397
ABCA3	ENSG00000167972	12162
ABCA4	ENSG00000198691	17193
ABCA5	ENSG00000154265	9698
ABCA7	ENSG00000064687	896
ABCB1	ENSG00000085563	1664
ABCB6	ENSG00000115657	4460
ABCC2	ENSG00000023839	436
ABCC3	ENSG00000108846	3593
ABCC4	ENSG00000125257	5602
ABCC6	ENSG00000091262	1924
ABCD1	ENSG00000101986	2599
ABCG1	ENSG00000160179	10371
ABCG2	ENSG00000118777	4836
ABHD11	ENSG00000106077	3245
ABHD17C	ENSG00000136379	7228
ABHD2	ENSG00000140526	7947
ABHD4	ENSG00000100439	2307
ABHD6	ENSG00000163686	11035
ABHD8	ENSG00000127220	5868
ABI1	ENSG00000136754	7289
ABI3BP	ENSG00000154175	9686
ABL1	ENSG00000097007	2072
ABL2	ENSG00000143322	8325
ABLIM1	ENSG00000099204	2080
ABLIM2	ENSG00000163995	11133
ABLIM3	ENSG00000173210	13347
ABR	ENSG00000159842	10337
ABRACL	ENSG00000146386	8796
ABTB1	ENSG00000114626	4296
ABTB2	ENSG00000166016	11671
ACAA2	ENSG00000167315	11992
ACADS	ENSG00000122971	5317
ACAP1	ENSG00000072818	1209
ACAP3	ENSG00000131584	6433
ACAT2	ENSG00000120437	5036
ACBD7	ENSG00000176244	13886
ACCS	ENSG00000110455	3775
ACE	ENSG00000159640	10317
ACHE	ENSG00000087085	1719
ACKR3	ENSG00000144476	8529
ACO1	ENSG00000122729	5290
ACOT1	ENSG00000184227	15288
ACOT11	ENSG00000162390	10659
ACOT2	ENSG00000119673	4922
ACOT7	ENSG00000097021	2073
ACOT9	ENSG00000123130	5330
ACOX2	ENSG00000168306	12251
ACP5	ENSG00000102575	2682
ACP6	ENSG00000162836	10781
ACPP	ENSG00000014257	351
ACSF2	ENSG00000167107	11946
ACSL1	ENSG00000151726	9400
ACSL3	ENSG00000123983	5417
ACSL4	ENSG00000068366	1040
ACSL5	ENSG00000197142	16749
ACSL6	ENSG00000164398	11278
ACSM3	ENSG00000005187	85
ACSS1	ENSG00000154930	9771
ACSS2	ENSG00000131069	6363
ACSS3	ENSG00000111058	3836
ACTA2	ENSG00000107796	3438
ACTG2	ENSG00000163017	10832
ACTL8	ENSG00000117148	4666
ACTN1	ENSG00000072110	1178
ACTN2	ENSG00000077522	1393
ACTN4	ENSG00000130402	6234
ACTR3C	ENSG00000106526	3308
ACVR1	ENSG00000115170	4367
ACVR2A	ENSG00000121989	5208
ACY3	ENSG00000132744	6615
ADA	ENSG00000196839	16663
ADA2	ENSG00000093072	1997
ADAM12	ENSG00000148848	9100
ADAM15	ENSG00000143537	8382
ADAM19	ENSG00000135074	6968
ADAM22	ENSG00000008277	211
ADAM23	ENSG00000114948	4338
ADAM28	ENSG00000042980	594
ADAM8	ENSG00000151651	9385
ADAM9	ENSG00000168615	12318
ADAMTS1	ENSG00000154734	9748
ADAMTS10	ENSG00000142303	8184
ADAMTS12	ENSG00000151388	9350
ADAMTS14	ENSG00000138316	7605
ADAMTS15	ENSG00000166106	11686
ADAMTS16	ENSG00000145536	8670
ADAMTS17	ENSG00000140470	7932
ADAMTS2	ENSG00000087116	1725
ADAMTS3	ENSG00000156140	9897
ADAMTS6	ENSG00000049192	656
ADAMTS7	ENSG00000136378	7227
ADAMTS9	ENSG00000163638	11021
ADAMTSL1	ENSG00000178031	14193
ADAMTSL4	ENSG00000143382	8344
ADAMTSL5	ENSG00000185761	15632
ADAP1	ENSG00000105963	3215
ADARB1	ENSG00000197381	16808
ADCY1	ENSG00000164742	11361
ADCY6	ENSG00000174233	13539
ADCY7	ENSG00000121281	5133
ADCY9	ENSG00000162104	10624
ADD2	ENSG00000075340	1305
ADD3	ENSG00000148700	9078
ADGRA2	ENSG00000020181	400
ADGRA3	ENSG00000152990	9554
ADGRB1	ENSG00000181790	14766
ADGRB2	ENSG00000121753	5178
ADGRD1	ENSG00000111452	3892
ADGRE1	ENSG00000174837	13634
ADGRE2	ENSG00000127507	5897
ADGRE5	ENSG00000123146	5335
ADGRF1	ENSG00000153292	9596
ADGRF4	ENSG00000153294	9597
ADGRF5	ENSG00000069122	1067
ADGRG1	ENSG00000205336	17875
ADGRG5	ENSG00000159618	10315
ADGRG6	ENSG00000112414	4055
ADGRL1	ENSG00000072071	1176
ADGRL2	ENSG00000117114	4659
ADGRL3	ENSG00000150471	9255
ADGRV1	ENSG00000164199	11223
ADIRF	ENSG00000148671	9072
ADM	ENSG00000148926	9103
ADM2	ENSG00000128165	5958
ADORA1	ENSG00000163485	10956
ADORA2A	ENSG00000128271	5971
ADORA2B	ENSG00000170425	12718
ADPRH	ENSG00000144843	8588
ADPRHL1	ENSG00000153531	9613
ADRA1B	ENSG00000170214	12665
ADRA2C	ENSG00000184160	15267
ADRB2	ENSG00000169252	12471
ADSSL1	ENSG00000185100	15483
ADTRP	ENSG00000111863	3963
AEBP1	ENSG00000106624	3326
AFAP1	ENSG00000196526	16571
AFAP1L1	ENSG00000157510	10056
AFAP1L2	ENSG00000169129	12434
AFDN	ENSG00000130396	6233
AFF1	ENSG00000172493	13210
AFF2	ENSG00000155966	9873
AFF3	ENSG00000144218	8494
AFF4	ENSG00000072364	1191
AFP	ENSG00000081051	1523
AGA	ENSG00000038002	546
AGAP1	ENSG00000157985	10109
AGAP2	ENSG00000135439	7040
AGAP2-AS1	ENSG00000255737	20923
AGAP3	ENSG00000133612	6732
AGMAT	ENSG00000116771	4611
AGMO	ENSG00000187546	16002
AGPAT2	ENSG00000169692	12557
AGPAT4	ENSG00000026652	460
AGR2	ENSG00000106541	3312
AGR3	ENSG00000173467	13402
AGRN	ENSG00000188157	16145
AGT	ENSG00000135744	7100
AGTRAP	ENSG00000177674	14137
AHNAK	ENSG00000124942	5583
AHNAK2	ENSG00000185567	15586
AHR	ENSG00000106546	3313
AHSG	ENSG00000145192	8621
AIF1	ENSG00000204472	17654
AIF1L	ENSG00000126878	5842
AIFM2	ENSG00000042286	584
AIFM3	ENSG00000183773	15193
AIG1	ENSG00000146416	8802
AIM2	ENSG00000163568	10990
AJUBA	ENSG00000129474	6118
AK1	ENSG00000106992	3365
AK4	ENSG00000162433	10673
AK5	ENSG00000154027	9662
AKAP12	ENSG00000131016	6348
AKAP6	ENSG00000151320	9337
AKAP7	ENSG00000118507	4810
AKAP9	ENSG00000127914	5932
AKNA	ENSG00000106948	3361
AKR1B1	ENSG00000085662	1666
AKR1B10	ENSG00000198074	17019
AKR1B15	ENSG00000227471	19760
AKR1C1	ENSG00000187134	15942
AKR1C2	ENSG00000151632	9382
AKR1C3	ENSG00000196139	16440
AKR1E2	ENSG00000165568	11560
AKR7A3	ENSG00000162482	10683
AKT1	ENSG00000142208	8175
AKT2	ENSG00000105221	3047
AKT3	ENSG00000117020	4653
ALB	ENSG00000163631	11014
ALCAM	ENSG00000170017	12632
ALDH1A1	ENSG00000165092	11450
ALDH1A2	ENSG00000128918	6054
ALDH1A3	ENSG00000184254	15290
ALDH1B1	ENSG00000137124	7374
ALDH1L1	ENSG00000144908	8598
ALDH1L2	ENSG00000136010	7158
ALDH2	ENSG00000111275	3866
ALDH3A1	ENSG00000108602	3554
ALDH3A2	ENSG00000072210	1187
ALDH3B1	ENSG00000006534	142
ALDH3B2	ENSG00000132746	6616
ALDH5A1	ENSG00000112294	4031
ALDH7A1	ENSG00000164904	11404
ALDOC	ENSG00000109107	3627
ALG1L	ENSG00000189366	16404
ALK	ENSG00000171094	12867
ALKBH3	ENSG00000166199	11720
ALOX5	ENSG00000012779	321
ALOX5AP	ENSG00000132965	6654
ALPG	ENSG00000163286	10900
ALPK1	ENSG00000073331	1228
ALPK2	ENSG00000198796	17243
ALPK3	ENSG00000136383	7230
ALPL	ENSG00000162551	10699
ALPP	ENSG00000163283	10898
ALS2CL	ENSG00000178038	14196
ALX1	ENSG00000180318	14545
AMACR	ENSG00000242110	20369
AMBP	ENSG00000106927	3360
AMER1	ENSG00000184675	15383
AMH	ENSG00000104899	2989
AMIGO2	ENSG00000139211	7753
AMN	ENSG00000166126	11690
AMOT	ENSG00000126016	5758
AMOTL1	ENSG00000166025	11673
AMOTL2	ENSG00000114019	4238
AMPD3	ENSG00000133805	6756
AMPH	ENSG00000078053	1409
AMT	ENSG00000145020	8607
AMY2B	ENSG00000240038	20288
ANG	ENSG00000214274	18668
ANGPT1	ENSG00000154188	9687
ANGPTL2	ENSG00000136859	7312
ANGPTL4	ENSG00000167772	12115
ANK1	ENSG00000029534	479
ANK2	ENSG00000145362	8648
ANK3	ENSG00000151150	9322
ANKEF1	ENSG00000132623	6589
ANKH	ENSG00000154122	9674
ANKLE1	ENSG00000160117	10366
ANKRD1	ENSG00000148677	9074
ANKRD13B	ENSG00000198720	17204
ANKRD18A	ENSG00000180071	14512
ANKRD18B	ENSG00000230453	19866
ANKRD2	ENSG00000165887	11637
ANKRD22	ENSG00000152766	9529
ANKRD29	ENSG00000154065	9666
ANKRD33B	ENSG00000164236	11229
ANKRD37	ENSG00000186352	15777
ANKRD44	ENSG00000065413	928
ANKRD6	ENSG00000135299	7004
ANKRD65	ENSG00000235098	20049
ANKS1B	ENSG00000185046	15471
ANKS6	ENSG00000165138	11462
ANLN	ENSG00000011426	300
ANO1	ENSG00000131620	6435
ANO10	ENSG00000160746	10464
ANO4	ENSG00000151572	9373
ANO9	ENSG00000185101	15484
ANOS1	ENSG00000011201	288
ANPEP	ENSG00000166825	11868
ANTXR1	ENSG00000169604	12538
ANTXR2	ENSG00000163297	10905
ANXA1	ENSG00000135046	6960
ANXA10	ENSG00000109511	3666
ANXA11	ENSG00000122359	5239
ANXA13	ENSG00000104537	2929
ANXA2	ENSG00000182718	14947
ANXA3	ENSG00000138772	7698
ANXA4	ENSG00000196975	16700
ANXA5	ENSG00000164111	11185
ANXA6	ENSG00000197043	16717
ANXA9	ENSG00000143412	8352
AOC1	ENSG00000002726	26
AOPEP	ENSG00000148120	9000
AOX1	ENSG00000138356	7610
AP1G2	ENSG00000213983	18628
AP1M2	ENSG00000129354	6106
AP1S2	ENSG00000182287	14860
AP1S3	ENSG00000152056	9435
AP3B2	ENSG00000103723	2844
APBA1	ENSG00000107282	3393
APBA2	ENSG00000034053	509
APBB1	ENSG00000166313	11747
APBB1IP	ENSG00000077420	1387
APBB2	ENSG00000163697	11039
APC	ENSG00000134982	6952
APCDD1	ENSG00000154856	9764
APCDD1L	ENSG00000198768	17230
APH1B	ENSG00000138613	7650
APLN	ENSG00000171388	12936
APLP1	ENSG00000105290	3064
APLP2	ENSG00000084234	1627
APOA1	ENSG00000118137	4770
APOA2	ENSG00000158874	10226
APOB	ENSG00000084674	1635
APOBEC3B	ENSG00000179750	14455
APOBEC3C	ENSG00000244509	20488
APOBEC3D	ENSG00000243811	20451
APOBEC3F	ENSG00000128394	5990
APOBEC3G	ENSG00000239713	20271
APOBR	ENSG00000184730	15395
APOC1	ENSG00000130208	6198
APOC2	ENSG00000234906	20041
APOD	ENSG00000189058	16345
APOE	ENSG00000130203	6196
APOH	ENSG00000091583	1936
APOL1	ENSG00000100342	2267
APOL2	ENSG00000128335	5985
APOL3	ENSG00000128284	5976
APOL6	ENSG00000221963	19468
APOLD1	ENSG00000178878	14319
APP	ENSG00000142192	8172
AQP1	ENSG00000240583	20308
AQP3	ENSG00000165272	11494
AQP5	ENSG00000161798	10576
AR	ENSG00000169083	12423
ARAF	ENSG00000078061	1410
ARAP2	ENSG00000047365	621
ARAP3	ENSG00000120318	5023
ARC	ENSG00000198576	17159
AREG	ENSG00000109321	3650
ARFGEF3	ENSG00000112379	4052
ARG2	ENSG00000081181	1531
ARHGAP10	ENSG00000071205	1151
ARHGAP15	ENSG00000075884	1329
ARHGAP18	ENSG00000146376	8792
ARHGAP21	ENSG00000107863	3451
ARHGAP22	ENSG00000128805	6042
ARHGAP24	ENSG00000138639	7658
ARHGAP25	ENSG00000163219	10886
ARHGAP26	ENSG00000145819	8708
ARHGAP27	ENSG00000159314	10280
ARHGAP28	ENSG00000088756	1784
ARHGAP29	ENSG00000137962	7534
ARHGAP30	ENSG00000186517	15818
ARHGAP31	ENSG00000031081	490
ARHGAP32	ENSG00000134909	6944
ARHGAP33	ENSG00000004777	59
ARHGAP39	ENSG00000147799	8973
ARHGAP4	ENSG00000089820	1855
ARHGAP40	ENSG00000124143	5439
ARHGAP42	ENSG00000165895	11639
ARHGAP44	ENSG00000006740	157
ARHGAP45	ENSG00000180448	14569
ARHGAP5	ENSG00000100852	2390
ARHGAP8	ENSG00000241484	20342
ARHGAP9	ENSG00000123329	5351
ARHGDIB	ENSG00000111348	3880
ARHGDIG	ENSG00000242173	20371
ARHGEF10	ENSG00000104728	2945
ARHGEF10L	ENSG00000074964	1284
ARHGEF12	ENSG00000196914	16680
ARHGEF16	ENSG00000130762	6305
ARHGEF17	ENSG00000110237	3751
ARHGEF19	ENSG00000142632	8224
ARHGEF2	ENSG00000116584	4575
ARHGEF25	ENSG00000240771	20315
ARHGEF26	ENSG00000114790	4321
ARHGEF28	ENSG00000214944	18742
ARHGEF3	ENSG00000163947	11122
ARHGEF35	ENSG00000213214	18531
ARHGEF37	ENSG00000183111	15036
ARHGEF4	ENSG00000136002	7156
ARHGEF40	ENSG00000165801	11617
ARHGEF5	ENSG00000050327	677
ARHGEF6	ENSG00000129675	6141
ARID1A	ENSG00000117713	4746
ARID1B	ENSG00000049618	667
ARID2	ENSG00000189079	16350
ARID3A	ENSG00000116017	4510
ARID3B	ENSG00000179361	14410
ARID5A	ENSG00000196843	16664
ARID5B	ENSG00000150347	9245
ARL 10.00	ENSG00000175414	13748
ARL 14.00	ENSG00000179674	14450
ARL4A	ENSG00000122644	5276
ARL4C	ENSG00000188042	16123
ARL4D	ENSG00000175906	13827
ARMC9	ENSG00000135931	7141
ARMCX1	ENSG00000126947	5850
ARMCX2	ENSG00000184867	15420
ARMCX3	ENSG00000102401	2668
ARMCX4	ENSG00000196440	16546
ARMCX6	ENSG00000198960	17337
ARMH1	ENSG00000198520	17140
ARMH4	ENSG00000139971	7861
ARNT	ENSG00000143437	8358
ARNT2	ENSG00000172379	13181
ARNTL2	ENSG00000029153	476
ARPC1B	ENSG00000130429	6238
ARPC4-TTLL3	ENSG00000250151	20601
ARPIN	ENSG00000242498	20390
ARPIN-AP3S2	ENSG00000250021	20595
ARPP21	ENSG00000172995	13310
ARRB1	ENSG00000137486	7436
ARRB2	ENSG00000141480	8080
ARRDC1	ENSG00000197070	16728
ARRDC3	ENSG00000113369	4168
ARRDC4	ENSG00000140450	7925
ARSB	ENSG00000113273	4153
ARSD	ENSG00000006756	160
ARSE	ENSG00000157399	10044
ARSI	ENSG00000183876	15223
ARSJ	ENSG00000180801	14613
ARTN	ENSG00000117407	4696
ARVCF	ENSG00000099889	2128
AS3MT	ENSG00000214435	18688
ASAH1	ENSG00000104763	2951
ASAP1	ENSG00000153317	9600
ASAP2	ENSG00000151693	9393
ASAP3	ENSG00000088280	1768
ASB2	ENSG00000100628	2357
ASB9	ENSG00000102048	2612
ASCL1	ENSG00000139352	7777
ASGR1	ENSG00000141505	8086
ASIC1	ENSG00000110881	3814
ASIC3	ENSG00000213199	18527
ASMTL	ENSG00000169093	12427
ASNS	ENSG00000070669	1124
ASPH	ENSG00000198363	17098
ASPHD1	ENSG00000174939	13654
ASPSCR1	ENSG00000169696	12558
ASRGL1	ENSG00000162174	10630
ASS1	ENSG00000130707	6286
ASTN2	ENSG00000148219	9015
ASXL1	ENSG00000171456	12956
ASXL2	ENSG00000143970	8460
ATAD3C	ENSG00000215915	18837
ATF1	ENSG00000123268	5348
ATF3	ENSG00000162772	10769
ATF5	ENSG00000169136	12436
ATF7IP2	ENSG00000166669	11833
ATG16L2	ENSG00000168010	12178
ATG9B	ENSG00000181652	14742
ATIC	ENSG00000138363	7611
ATL1	ENSG00000198513	17136
ATM	ENSG00000149311	9150
ATOH8	ENSG00000168874	12370
ATP10A	ENSG00000206190	18000
ATP10B	ENSG00000118322	4793
ATP10D	ENSG00000145246	8631
ATP11A	ENSG00000068650	1047
ATP11C	ENSG00000101974	2596
ATP1A1	ENSG00000163399	10933
ATP1A3	ENSG00000105409	3095
ATP1B1	ENSG00000143153	8284
ATP2A3	ENSG00000074370	1264
ATP2B1	ENSG00000070961	1142
ATP2B3	ENSG00000067842	1024
ATP2B4	ENSG00000058668	792
ATP2C2	ENSG00000064270	880
ATP6V0A1	ENSG00000033627	506
ATP6V0A4	ENSG00000105929	3210
ATP6V0E2	ENSG00000171130	12881
ATP6V1B1	ENSG00000116039	4515
ATP6V1G2	ENSG00000213760	18593
ATP6V1G2-DDX39B	ENSG00000254870	20848
ATP7B	ENSG00000123191	5342
ATP8A1	ENSG00000124406	5498
ATP8B1	ENSG00000081923	1553
ATP8B2	ENSG00000143515	8379
ATP8B3	ENSG00000130270	6207
ATP8B4	ENSG00000104043	2859
ATP9A	ENSG00000054793	735
ATR	ENSG00000175054	13677
ATRNL1	ENSG00000107518	3408
ATRX	ENSG00000085224	1648
ATXN1	ENSG00000124788	5567
AUTS2	ENSG00000158321	10152
AVPI1	ENSG00000119986	4981
AXIN1	ENSG00000103126	2759
AXIN2	ENSG00000168646	12323
AXL	ENSG00000167601	12051
AZGP1	ENSG00000160862	10483
AZIN2	ENSG00000142920	8255
AZU1	ENSG00000172232	13140
B2M	ENSG00000166710	11842
B3GALNT1	ENSG00000169255	12472
B3GALT4	ENSG00000235863	20080
B3GALT5	ENSG00000183778	15195
B3GAT1	ENSG00000109956	3716
B3GNT3	ENSG00000179913	14483
B3GNT5	ENSG00000176597	13944
B3GNT7	ENSG00000156966	9990
B3GNT9	ENSG00000237172	20130
B4GALNT1	ENSG00000135454	7047
B4GALNT3	ENSG00000139044	7722
B4GALNT4	ENSG00000182272	14859
B4GALT1	ENSG00000086062	1684
B4GALT4	ENSG00000121578	5162
B4GALT6	ENSG00000118276	4788
B4GAT1	ENSG00000174684	13610
B9D1	ENSG00000108641	3558
BAALC	ENSG00000164929	11409
BACE1	ENSG00000186318	15770
BACE2	ENSG00000182240	14848
BACH2	ENSG00000112182	4007
BAG2	ENSG00000112208	4012
BAG3	ENSG00000151929	9426
BAIAP2	ENSG00000175866	13818
BAIAP2L1	ENSG00000006453	138
BAIAP2L2	ENSG00000128298	5979
BAIAP3	ENSG00000007516	189
BAMBI	ENSG00000095739	2041
BANK1	ENSG00000153064	9565
BAP1	ENSG00000163930	11113
BARD1	ENSG00000138376	7613
BARX1	ENSG00000131668	6441
BARX2	ENSG00000043039	595
BASP1	ENSG00000176788	13976
BATF	ENSG00000156127	9895
BATF3	ENSG00000123685	5400
BAX	ENSG00000087088	1722
BAZ1A	ENSG00000198604	17168
BBC3	ENSG00000105327	3069
BCAM	ENSG00000187244	15969
BCAR1	ENSG00000050820	688
BCAR3	ENSG00000137936	7525
BCAS1	ENSG00000064787	901
BCAS3	ENSG00000141376	8055
BCAS4	ENSG00000124243	5476
BCAT1	ENSG00000060982	826
BCHE	ENSG00000114200	4255
BCL10	ENSG00000142867	8250
BCL11A	ENSG00000119866	4957
BCL11B	ENSG00000127152	5865
BCL2	ENSG00000171791	13036
BCL2A1	ENSG00000140379	7913
BCL2L1	ENSG00000171552	12988
BCL2L11	ENSG00000153094	9570
BCL2L12	ENSG00000126453	5792
BCL2L15	ENSG00000188761	16273
BCL3	ENSG00000069399	1074
BCL6	ENSG00000113916	4232
BCL7A	ENSG00000110987	3829
BCL9	ENSG00000116128	4524
BCL9L	ENSG00000186174	15737
BCLAF1	ENSG00000029363	477
BCOR	ENSG00000183337	15085
BCORL1	ENSG00000085185	1647
BCR	ENSG00000186716	15851
BDH1	ENSG00000161267	10532
BDH2	ENSG00000164039	11147
BDKRB1	ENSG00000100739	2374
BDKRB2	ENSG00000168398	12269
BDNF	ENSG00000176697	13959
BEGAIN	ENSG00000183092	15033
BEND6	ENSG00000151917	9424
BEND7	ENSG00000165626	11571
BEST1	ENSG00000167995	12171
BEST3	ENSG00000127325	5876
BEX1	ENSG00000133169	6695
BEX2	ENSG00000133134	6689
BEX3	ENSG00000166681	11836
BEX4	ENSG00000102409	2669
BEX5	ENSG00000184515	15352
BGN	ENSG00000182492	14898
BHLHA15	ENSG00000180535	14579
BHLHE40	ENSG00000134107	6797
BHLHE41	ENSG00000123095	5324
BHMT2	ENSG00000132840	6632
BICC1	ENSG00000122870	5306
BICDL1	ENSG00000135127	6982
BICDL2	ENSG00000162069	10619
BIK	ENSG00000100290	2243
BIN1	ENSG00000136717	7282
BIN2	ENSG00000110934	3824
BIRC3	ENSG00000023445	430
BIRC6	ENSG00000115760	4473
BIRC7	ENSG00000101197	2461
BIVM	ENSG00000134897	6939
BLK	ENSG00000136573	7260
BLM	ENSG00000197299	16785
BLMH	ENSG00000108578	3546
BLNK	ENSG00000095585	2035
BLVRA	ENSG00000106605	3321
BLVRB	ENSG00000090013	1861
BMERB1	ENSG00000166780	11852
BMF	ENSG00000104081	2866
BMP1	ENSG00000168487	12287
BMP2	ENSG00000125845	5708
BMP4	ENSG00000125378	5616
BMP5	ENSG00000112175	4006
BMP6	ENSG00000153162	9578
BMP7	ENSG00000101144	2442
BMP8B	ENSG00000116985	4644
BMPER	ENSG00000164619	11330
BMPR1A	ENSG00000107779	3436
BNC1	ENSG00000169594	12535
BNC2	ENSG00000173068	13319
BNIP3	ENSG00000176171	13870
BNIP3L	ENSG00000104765	2952
BOC	ENSG00000144857	8592
BOK	ENSG00000176720	13962
BOLA1	ENSG00000178096	14205
BPIFB1	ENSG00000125999	5752
BRAF	ENSG00000157764	10081
BRCA1	ENSG00000012048	312
BRCA2	ENSG00000139618	7809
BRD3	ENSG00000169925	12611
BRD4	ENSG00000141867	8139
BRI3	ENSG00000164713	11355
BRIP1	ENSG00000136492	7246
BRSK1	ENSG00000160469	10435
BRSK2	ENSG00000174672	13609
BSCL2	ENSG00000168000	12173
BSPRY	ENSG00000119411	4889
BST1	ENSG00000109743	3689
BST2	ENSG00000130303	6213
BTBD11	ENSG00000151136	9320
BTBD19	ENSG00000222009	19488
BTBD3	ENSG00000132640	6593
BTBD6	ENSG00000184887	15423
BTC	ENSG00000174808	13632
BTG1	ENSG00000133639	6736
BTG2	ENSG00000159388	10292
BTG3	ENSG00000154640	9736
BTK	ENSG00000010671	271
BTN2A2	ENSG00000124508	5515
BTN3A1	ENSG00000026950	462
BTN3A2	ENSG00000186470	15805
BTN3A3	ENSG00000111801	3950
BTNL9	ENSG00000165810	11623
BUB1B	ENSG00000156970	9992
BVES	ENSG00000112276	4026
C11orf52	ENSG00000149300	9147
C11orf74	ENSG00000166352	11763
C12orf57	ENSG00000111678	3922
C12orf75	ENSG00000235162	20053
C14orf132	ENSG00000227051	19744
C15orf48	ENSG00000166920	11898
C16orf54	ENSG00000185905	15666
C16orf74	ENSG00000154102	9671
C19orf33	ENSG00000167644	12069
C19orf57	ENSG00000132016	6494
C1QL1	ENSG00000131094	6366
C1QL4	ENSG00000186897	15888
C1QTNF1	ENSG00000173918	13488
C1QTNF3	ENSG00000082196	1562
C1QTNF6	ENSG00000133466	6724
C1R	ENSG00000159403	10295
C1RL	ENSG00000139178	7742
C1S	ENSG00000182326	14869
C1orf115	ENSG00000162817	10778
C1orf116	ENSG00000182795	14962
C1orf198	ENSG00000119280	4871
C1orf21	ENSG00000116667	4583
C1orf210	ENSG00000253313	20765
C1orf226	ENSG00000239887	20280
C1orf54	ENSG00000118292	4789
C1orf61	ENSG00000125462	5633
C2	ENSG00000166278	11742
C20orf194	ENSG00000088854	1794
C21orf58	ENSG00000160298	10409
C21orf91	ENSG00000154642	9737
C2CD2	ENSG00000157617	10070
C2orf15	ENSG00000273045	24043
C2orf72	ENSG00000204128	17541
C2orf74	ENSG00000237651	20155
C2orf88	ENSG00000187699	16039
C3	ENSG00000125730	5670
C3orf14	ENSG00000114405	4277
C3orf18	ENSG00000088543	1780
C3orf52	ENSG00000114529	4290
C3orf67	ENSG00000163689	11037
C4A	ENSG00000244731	20498
C4B	ENSG00000224389	19650
C4BPB	ENSG00000123843	5410
C4orf19	ENSG00000154274	9700
C4orf48	ENSG00000243449	20426
C5	ENSG00000106804	3352
C5orf56	ENSG00000197536	16851
C5orf63	ENSG00000164241	11231
C6orf132	ENSG00000188112	16137
C6orf141	ENSG00000197261	16775
C6orf15	ENSG00000204542	17686
C6orf223	ENSG00000181577	14728
C8orf31	ENSG00000177335	14077
C8orf88	ENSG00000253250	20758
C9orf116	ENSG00000160345	10420
C9orf152	ENSG00000188959	16318
C9orf64	ENSG00000165118	11456
CA11	ENSG00000063180	857
CA12	ENSG00000074410	1265
CA14	ENSG00000118298	4790
CA2	ENSG00000104267	2886
CA8	ENSG00000178538	14270
CA9	ENSG00000107159	3379
CAB39L	ENSG00000102547	2679
CABLES1	ENSG00000134508	6876
CABYR	ENSG00000154040	9664
CACFD1	ENSG00000160325	10417
CACHD1	ENSG00000158966	10232
CACNA1A	ENSG00000141837	8136
CACNA1C	ENSG00000151067	9311
CACNA1D	ENSG00000157388	10043
CACNA1H	ENSG00000196557	16582
CACNA2D1	ENSG00000153956	9652
CACNA2D2	ENSG00000007402	188
CACNA2D3	ENSG00000157445	10049
CACNA2D4	ENSG00000151062	9309
CACNB3	ENSG00000167535	12033
CACNG4	ENSG00000075461	1315
CACNG6	ENSG00000130433	6239
CACNG7	ENSG00000105605	3131
CADM1	ENSG00000182985	15005
CADM3	ENSG00000162706	10745
CADM4	ENSG00000105767	3180
CADPS	ENSG00000163618	11007
CADPS2	ENSG00000081803	1547
CALB1	ENSG00000104327	2895
CALB2	ENSG00000172137	13117
CALCA	ENSG00000110680	3788
CALCRL	ENSG00000064989	907
CALD1	ENSG00000122786	5298
CALHM2	ENSG00000138172	7585
CALML3	ENSG00000178363	14246
CALML4	ENSG00000129007	6063
CALML5	ENSG00000178372	14247
CALR	ENSG00000179218	14388
CALU	ENSG00000128595	6013
CAMK1	ENSG00000134072	6794
CAMK1D	ENSG00000183049	15022
CAMK2B	ENSG00000058404	789
CAMK2D	ENSG00000145349	8645
CAMK2N1	ENSG00000162545	10698
CAMK2N2	ENSG00000163888	11102
CAMK4	ENSG00000152495	9498
CAMKK1	ENSG00000004660	55
CAMKV	ENSG00000164076	11165
CAMSAP2	ENSG00000118200	4778
CAMSAP3	ENSG00000076826	1360
CAMTA1	ENSG00000171735	13025
CAND2	ENSG00000144712	8564
CANT1	ENSG00000171302	12921
CAP2	ENSG00000112186	4009
CAPG	ENSG00000042493	589
CAPN12	ENSG00000182472	14894
CAPN13	ENSG00000162949	10811
CAPN2	ENSG00000162909	10800
CAPN3	ENSG00000092529	1978
CAPN5	ENSG00000149260	9139
CAPN8	ENSG00000203697	17439
CAPRIN2	ENSG00000110888	3816
CAPS	ENSG00000105519	3119
CARD10	ENSG00000100065	2173
CARD11	ENSG00000198286	17081
CARD14	ENSG00000141527	8093
CARD16	ENSG00000204397	17632
CARD6	ENSG00000132357	6535
CARD9	ENSG00000187796	16066
CARMIL1	ENSG00000079691	1476
CARMIL2	ENSG00000159753	10330
CARS	ENSG00000110619	3782
CASK	ENSG00000147044	8864
CASKIN2	ENSG00000177303	14074
CASP1	ENSG00000137752	7484
CASP10	ENSG00000003400	39
CASP3	ENSG00000164305	11252
CASP4	ENSG00000196954	16693
CASP8	ENSG00000064012	870
CASP9	ENSG00000132906	6642
CAST	ENSG00000153113	9572
CASZ1	ENSG00000130940	6335
CATSPER1	ENSG00000175294	13725
CAV1	ENSG00000105974	3219
CAV2	ENSG00000105971	3218
CAVIN1	ENSG00000177469	14101
CAVIN2	ENSG00000168497	12293
CAVIN3	ENSG00000170955	12844
CBFA2T3	ENSG00000129993	6166
CBFB	ENSG00000067955	1026
CBL	ENSG00000110395	3765
CBLB	ENSG00000114423	4279
CBLC	ENSG00000142273	8182
CBR1	ENSG00000159228	10268
CBR3	ENSG00000159231	10269
CBS	ENSG00000160200	10383
CBX2	ENSG00000173894	13481
CC2D2A	ENSG00000048342	640
CCBE1	ENSG00000183287	15070
CCDC106	ENSG00000173581	13424
CCDC120	ENSG00000147144	8884
CCDC136	ENSG00000128596	6014
CCDC149	ENSG00000181982	14795
CCDC152	ENSG00000198865	17285
CCDC169	ENSG00000242715	20398
CCDC28B	ENSG00000160050	10354
CCDC3	ENSG00000151468	9360
CCDC40	ENSG00000141519	8089
CCDC50	ENSG00000152492	9497
CCDC57	ENSG00000176155	13866
CCDC6	ENSG00000108091	3478
CCDC68	ENSG00000166510	11806
CCDC69	ENSG00000198624	17171
CCDC71L	ENSG00000253276	20760
CCDC74A	ENSG00000163040	10836
CCDC74B	ENSG00000152076	9437
CCDC78	ENSG00000162004	10608
CCDC8	ENSG00000169515	12522
CCDC80	ENSG00000091986	1950
CCDC85B	ENSG00000175602	13783
CCDC85C	ENSG00000205476	17898
CCDC88A	ENSG00000115355	4406
CCDC88B	ENSG00000168071	12195
CCDC88C	ENSG00000015133	356
CCDC92	ENSG00000119242	4870
CCDC9B	ENSG00000188549	16226
CCK	ENSG00000187094	15933
CCL2	ENSG00000108691	3567
CCL20	ENSG00000115009	4346
CCL26	ENSG00000006606	145
CCL28	ENSG00000151882	9419
CCN1	ENSG00000142871	8251
CCN2	ENSG00000118523	4817
CCN3	ENSG00000136999	7353
CCN5	ENSG00000064205	877
CCNA1	ENSG00000133101	6673
CCNB1IP1	ENSG00000100814	2385
CCND1	ENSG00000110092	3739
CCND2	ENSG00000118971	4852
CCND3	ENSG00000112576	4073
CCNE1	ENSG00000105173	3035
CCNE2	ENSG00000175305	13726
CCNG2	ENSG00000138764	7693
CCNJL	ENSG00000135083	6970
CCNO	ENSG00000152669	9517
CCPG1	ENSG00000260916	21268
CCR1	ENSG00000163823	11082
CCR10	ENSG00000184451	15336
CCR4	ENSG00000183813	15208
CCR7	ENSG00000126353	5788
CD109	ENSG00000156535	9951
CD14	ENSG00000170458	12727
CD151	ENSG00000177697	14148
CD163L1	ENSG00000177675	14138
CD180	ENSG00000134061	6792
CD19	ENSG00000177455	14094
CD200	ENSG00000091972	1949
CD209	ENSG00000090659	1893
CD22	ENSG00000012124	314
CD247	ENSG00000198821	17255
CD248	ENSG00000174807	13631
CD27	ENSG00000139193	7748
CD274	ENSG00000120217	5008
CD276	ENSG00000103855	2850
CD28	ENSG00000178562	14271
CD300A	ENSG00000167851	12134
CD302	ENSG00000241399	20337
CD320	ENSG00000167775	12117
CD33	ENSG00000105383	3086
CD34	ENSG00000174059	13509
CD36	ENSG00000135218	6991
CD37	ENSG00000104894	2987
CD38	ENSG00000004468	51
CD3D	ENSG00000167286	11987
CD3E	ENSG00000198851	17276
CD4	ENSG00000010610	269
CD40	ENSG00000101017	2422
CD44	ENSG00000026508	458
CD47	ENSG00000196776	16646
CD48	ENSG00000117091	4658
CD52	ENSG00000169442	12509
CD53	ENSG00000143119	8277
CD55	ENSG00000196352	16505
CD58	ENSG00000116815	4619
CD59	ENSG00000085063	1645
CD63	ENSG00000135404	7029
CD68	ENSG00000129226	6090
CD69	ENSG00000110848	3808
CD7	ENSG00000173762	13460
CD72	ENSG00000137101	7371
CD74	ENSG00000019582	396
CD79A	ENSG00000105369	3078
CD79B	ENSG00000007312	180
CD81	ENSG00000110651	3784
CD82	ENSG00000085117	1646
CD83	ENSG00000112149	4002
CD84	ENSG00000066294	969
CD86	ENSG00000114013	4237
CD9	ENSG00000010278	255
CD93	ENSG00000125810	5689
CD96	ENSG00000153283	9594
CD99	ENSG00000002586	24
CD99L2	ENSG00000102181	2637
CDA	ENSG00000158825	10217
CDC14B	ENSG00000081377	1538
CDC42BPA	ENSG00000143776	8426
CDC42BPB	ENSG00000198752	17221
CDC42BPG	ENSG00000171219	12906
CDC42EP1	ENSG00000128283	5975
CDC42EP2	ENSG00000149798	9214
CDC42EP3	ENSG00000163171	10876
CDC42EP4	ENSG00000179604	14441
CDC42EP5	ENSG00000167617	12058
CDC73	ENSG00000134371	6856
CDCA7	ENSG00000144354	8510
CDCA7L	ENSG00000164649	11338
CDCP1	ENSG00000163814	11077
CDH1	ENSG00000039068	556
CDH10	ENSG00000040731	573
CDH11	ENSG00000140937	7995
CDH12	ENSG00000154162	9683
CDH13	ENSG00000140945	7999
CDH17	ENSG00000079112	1451
CDH18	ENSG00000145526	8669
CDH19	ENSG00000071991	1171
CDH2	ENSG00000170558	12754
CDH23	ENSG00000107736	3430
CDH24	ENSG00000139880	7850
CDH3	ENSG00000062038	838
CDH4	ENSG00000179242	14392
CDH5	ENSG00000179776	14461
CDH6	ENSG00000113361	4166
CDH8	ENSG00000150394	9247
CDHR1	ENSG00000148600	9065
CDHR3	ENSG00000128536	6002
CDIP1	ENSG00000089486	1842
CDK12	ENSG00000167258	11980
CDK14	ENSG00000058091	785
CDK15	ENSG00000138395	7621
CDK18	ENSG00000117266	4679
CDK20	ENSG00000156345	9923
CDK2AP1	ENSG00000111328	3874
CDK4	ENSG00000135446	7043
CDK5R1	ENSG00000176749	13968
CDK5R2	ENSG00000171450	12953
CDK6	ENSG00000105810	3187
CDKN1A	ENSG00000124762	5556
CDKN1B	ENSG00000111276	3867
CDKN1C	ENSG00000129757	6148
CDKN2A	ENSG00000147889	8986
CDKN2B	ENSG00000147883	8984
CDKN2C	ENSG00000123080	5321
CDKN2D	ENSG00000129355	6107
CDO1	ENSG00000129596	6133
CDON	ENSG00000064309	882
CDR2L	ENSG00000109089	3623
CDRT1	ENSG00000241322	20333
CDS1	ENSG00000163624	11009
CDT1	ENSG00000167513	12024
CDX2	ENSG00000165556	11558
CDYL2	ENSG00000166446	11787
CEACAM1	ENSG00000079385	1465
CEACAM19	ENSG00000186567	15826
CEACAM5	ENSG00000105388	3087
CEACAM6	ENSG00000086548	1699
CEBPA	ENSG00000245848	20505
CEBPB	ENSG00000172216	13139
CEBPD	ENSG00000221869	19437
CECR2	ENSG00000099954	2139
CELF2	ENSG00000048740	650
CELF3	ENSG00000159409	10296
CELF4	ENSG00000101489	2540
CELSR1	ENSG00000075275	1300
CELSR2	ENSG00000143126	8279
CELSR3	ENSG00000008300	215
CEMIP	ENSG00000103888	2852
CEMIP2	ENSG00000135048	6962
CEND1	ENSG00000184524	15354
CENPV	ENSG00000166582	11823
CEP112	ENSG00000154240	9693
CEP170	ENSG00000143702	8413
CEP170B	ENSG00000099814	2117
CEP41	ENSG00000106477	3302
CEP89	ENSG00000121289	5134
CERCAM	ENSG00000167123	11952
CERK	ENSG00000100422	2301
CERKL	ENSG00000188452	16208
CERS1	ENSG00000223802	19627
CERS4	ENSG00000090661	1894
CERS6	ENSG00000172292	13155
CES1	ENSG00000198848	17275
CES3	ENSG00000172828	13277
CES4A	ENSG00000172824	13276
CFAP300	ENSG00000137691	7468
CFB	ENSG00000243649	20437
CFD	ENSG00000197766	16916
CFH	ENSG00000000971	8
CFI	ENSG00000205403	17884
CFL2	ENSG00000165410	11521
CFLAR	ENSG00000003402	40
CFTR	ENSG00000001626	17
CGA	ENSG00000135346	7017
CGAS	ENSG00000164430	11289
CGB5	ENSG00000189052	16342
CGB8	ENSG00000213030	18507
CGN	ENSG00000143375	8341
CGNL1	ENSG00000128849	6046
CGREF1	ENSG00000138028	7543
CHAC1	ENSG00000128965	6059
CHCHD10	ENSG00000250479	20613
CHD2	ENSG00000173575	13422
CHD4	ENSG00000111642	3908
CHD7	ENSG00000171316	12927
CHDH	ENSG00000016391	369
CHEK2	ENSG00000183765	15191
CHFR	ENSG00000072609	1200
CHGA	ENSG00000100604	2351
CHGB	ENSG00000089199	1829
CHI3L1	ENSG00000133048	6664
CHI3L2	ENSG00000064886	903
CHIC2	ENSG00000109220	3644
CHL1	ENSG00000134121	6801
CHMP4C	ENSG00000164695	11352
CHN1	ENSG00000128656	6028
CHN2	ENSG00000106069	3243
CHPF	ENSG00000123989	5418
CHPT1	ENSG00000111666	3915
CHRD	ENSG00000090539	1886
CHRDL1	ENSG00000101938	2588
CHRNA3	ENSG00000080644	1506
CHRNA5	ENSG00000169684	12554
CHRNB1	ENSG00000170175	12658
CHRNB2	ENSG00000160716	10462
CHST1	ENSG00000175264	13718
CHST10	ENSG00000115526	4438
CHST11	ENSG00000171310	12924
CHST14	ENSG00000169105	12429
CHST15	ENSG00000182022	14800
CHST2	ENSG00000175040	13675
CHST3	ENSG00000122863	5305
CHST6	ENSG00000183196	15054
CHST7	ENSG00000147119	8875
CIART	ENSG00000159208	10261
CIB2	ENSG00000136425	7232
CIC	ENSG00000079432	1468
CIDEB	ENSG00000136305	7221
CIITA	ENSG00000179583	14436
CISH	ENSG00000114737	4308
CITED1	ENSG00000125931	5735
CITED2	ENSG00000164442	11293
CITED4	ENSG00000179862	14475
CKB	ENSG00000166165	11707
CKMT1A	ENSG00000223572	19618
CKMT1B	ENSG00000237289	20135
CKS1BP3	ENSG00000268942	23493
CLCA2	ENSG00000137975	7537
CLCF1	ENSG00000175505	13762
CLCN4	ENSG00000073464	1231
CLDN1	ENSG00000163347	10914
CLDN10	ENSG00000134873	6935
CLDN11	ENSG00000013297	330
CLDN12	ENSG00000157224	10026
CLDN15	ENSG00000106404	3294
CLDN16	ENSG00000113946	4234
CLDN2	ENSG00000165376	11512
CLDN23	ENSG00000253958	20795
CLDN3	ENSG00000165215	11483
CLDN4	ENSG00000189143	16362
CLDN6	ENSG00000184697	15387
CLDN7	ENSG00000181885	14778
CLDN9	ENSG00000213937	18621
CLEC11A	ENSG00000105472	3106
CLEC2B	ENSG00000110852	3810
CLEC2D	ENSG00000069493	1078
CLEC3B	ENSG00000163815	11078
CLEC7A	ENSG00000172243	13144
CLGN	ENSG00000153132	9574
CLIC2	ENSG00000155962	9872
CLIC3	ENSG00000169583	12533
CLIC4	ENSG00000169504	12518
CLIC5	ENSG00000112782	4101
CLIP1	ENSG00000130779	6312
CLIP2	ENSG00000106665	3334
CLIP3	ENSG00000105270	3059
CLIP4	ENSG00000115295	4395
CLMN	ENSG00000165959	11656
CLMP	ENSG00000166250	11731
CLP 1	ENSG00000172409	13188
CLRN3	ENSG00000180745	14604
CLSPN	ENSG00000092853	1987
CLSTN2	ENSG00000158258	10144
CLSTN3	ENSG00000139182	7744
CLTC	ENSG00000141367	8053
CLTCL1	ENSG00000070371	1110
CLU	ENSG00000120885	5095
CLYBL	ENSG00000125246	5598
CMBL	ENSG00000164237	11230
CMIP	ENSG00000153815	9634
CMPK2	ENSG00000134326	6847
CMTM1	ENSG00000089505	1843
CMTM3	ENSG00000140931	7993
CMTM4	ENSG00000183723	15176
CMTM7	ENSG00000153551	9614
CMTM8	ENSG00000170293	12687
CNBD1	ENSG00000176571	13941
CNBP	ENSG00000169714	12561
CNFN	ENSG00000105427	3098
CNIH2	ENSG00000174871	13640
CNIH3	ENSG00000143786	8427
CNKSR1	ENSG00000142675	8230
CNKSR3	ENSG00000153721	9625
CNN1	ENSG00000130176	6190
CNN2	ENSG00000064666	895
CNN3	ENSG00000117519	4715
CNNM1	ENSG00000119946	4973
CNOT3	ENSG00000088038	1762
CNPY4	ENSG00000166997	11923
CNR1	ENSG00000118432	4800
CNRIP1	ENSG00000119865	4956
CNTFR	ENSG00000122756	5294
CNTLN	ENSG00000044459	606
CNTN1	ENSG00000018236	381
CNTNAP1	ENSG00000108797	3579
CNTNAP2	ENSG00000174469	13576
CNTNAP3	ENSG00000106714	3342
CNTNAP3B	ENSG00000154529	9725
CNTRL	ENSG00000119397	4884
COBL	ENSG00000106078	3246
COBLL1	ENSG00000082438	1569
COCH	ENSG00000100473	2316
COL11A1	ENSG00000060718	822
COL12A1	ENSG00000111799	3949
COL13A1	ENSG00000197467	16836
COL14A1	ENSG00000187955	16100
COL15A1	ENSG00000204291	17587
COL16A1	ENSG00000084636	1633
COL17A1	ENSG00000065618	942
COL18A1	ENSG00000182871	14977
COL19A1	ENSG00000082293	1567
COL1A1	ENSG00000108821	3584
COL1A2	ENSG00000164692	11350
COL21A1	ENSG00000124749	5555
COL22A1	ENSG00000169436	12507
COL27A1	ENSG00000196739	16635
COL2A1	ENSG00000139219	7755
COL3A1	ENSG00000168542	12304
COL4A1	ENSG00000187498	15990
COL4A2	ENSG00000134871	6934
COL4A3	ENSG00000169031	12412
COL4A5	ENSG00000188153	16143
COL4A6	ENSG00000197565	16859
COL5A1	ENSG00000130635	6269
COL5A2	ENSG00000204262	17577
COL5A3	ENSG00000080573	1502
COL6A1	ENSG00000142156	8163
COL6A2	ENSG00000142173	8166
COL6A3	ENSG00000163359	10920
COL7A1	ENSG00000114270	4261
COL8A1	ENSG00000144810	8579
COL9A2	ENSG00000049089	653
COL9A3	ENSG00000092758	1982
COLCA1	ENSG00000196167	16450
COLCA2	ENSG00000214290	18671
COLEC10	ENSG00000184374	15321
COLEC11	ENSG00000118004	4762
COLEC12	ENSG00000158270	10145
COLGALT2	ENSG00000198756	17225
COMTD1	ENSG00000165644	11578
COPZ2	ENSG00000005243	89
COQ8A	ENSG00000163050	10839
CORO1A	ENSG00000102879	2710
CORO1B	ENSG00000172725	13248
CORO1C	ENSG00000110880	3813
CORO2A	ENSG00000106789	3349
CORO2B	ENSG00000103647	2838
CORO6	ENSG00000167549	12037
COTL1	ENSG00000103187	2770
COX6B2	ENSG00000160471	10436
CP	ENSG00000047457	623
CPA4	ENSG00000128510	5996
CPAMD8	ENSG00000160111	10364
CPD	ENSG00000108582	3547
CPE	ENSG00000109472	3663
CPEB1	ENSG00000214575	18701
CPEB2	ENSG00000137449	7429
CPEB3	ENSG00000107864	3452
CPEB4	ENSG00000113742	4217
CPED1	ENSG00000106034	3238
CPLX1	ENSG00000168993	12402
CPLX2	ENSG00000145920	8730
CPM	ENSG00000135678	7088
CPNE2	ENSG00000140848	7986
CPNE4	ENSG00000196353	16506
CPNE5	ENSG00000124772	5559
CPNE7	ENSG00000178773	14305
CPNE8	ENSG00000139117	7728
CPPED1	ENSG00000103381	2807
CPQ	ENSG00000104324	2893
CPS1	ENSG00000021826	414
CPT1A	ENSG00000110090	3738
CPT1B	ENSG00000205560	17908
CPT1C	ENSG00000169169	12440
CPVL	ENSG00000106066	3242
CPXM1	ENSG00000088882	1797
CPZ	ENSG00000109625	3676
CR2	ENSG00000117322	4687
CRABP1	ENSG00000166426	11779
CRABP2	ENSG00000143320	8323
CRACR2A	ENSG00000130038	6174
CRACR2B	ENSG00000177685	14142
CRAT	ENSG00000095321	2025
CRB3	ENSG00000130545	6258
CREB1	ENSG00000118260	4785
CREB3L1	ENSG00000157613	10069
CREB3L2	ENSG00000182158	14825
CREB3L4	ENSG00000143578	8394
CREB5	ENSG00000146592	8820
CREBBP	ENSG00000005339	92
CREG1	ENSG00000143162	8289
CREG2	ENSG00000175874	13820
CRIM1	ENSG00000150938	9295
CRIP1	ENSG00000213145	18521
CRIP2	ENSG00000182809	14964
CRISPLD1	ENSG00000121005	5112
CRISPLD2	ENSG00000103196	2772
CRLF1	ENSG00000006016	117
CRLF2	ENSG00000205755	17938
CRMP1	ENSG00000072832	1210
CRNKL1	ENSG00000101343	2500
CROCC	ENSG00000058453	790
CROT	ENSG00000005469	98
CRTAP	ENSG00000170275	12681
CRTC1	ENSG00000105662	3150
CRTC3	ENSG00000140577	7959
CRY1	ENSG00000008405	221
CRYAB	ENSG00000109846	3702
CRYBG1	ENSG00000112297	4032
CRYBG2	ENSG00000176092	13853
CRYBG3	ENSG00000080200	1490
CRYL1	ENSG00000165475	11533
CRYM	ENSG00000103316	2794
CRYZ	ENSG00000116791	4616
CSAG1	ENSG00000198930	17320
CSF1	ENSG00000184371	15320
CSF1R	ENSG00000182578	14918
CSF2	ENSG00000164400	11280
CSF2RA	ENSG00000198223	17068
CSF2RB	ENSG00000100368	2282
CSF3	ENSG00000108342	3506
CSF3R	ENSG00000119535	4902
CSGALNACT1	ENSG00000147408	8920
CSMD1	ENSG00000183117	15038
CSMD3	ENSG00000164796	11375
CSPG4	ENSG00000173546	13415
CSPG5	ENSG00000114646	4299
CSRP1	ENSG00000159176	10253
CSRP2	ENSG00000175183	13702
CST1	ENSG00000170373	12705
CST3	ENSG00000101439	2522
CST6	ENSG00000175315	13729
CST7	ENSG00000077984	1406
CSTA	ENSG00000121552	5159
CSTB	ENSG00000160213	10390
CTAG2	ENSG00000126890	5845
CTBP2	ENSG00000175029	13674
CTCF	ENSG00000102974	2731
CTDSPL	ENSG00000144677	8561
CTF1	ENSG00000150281	9242
CTH	ENSG00000116761	4610
CTHRC1	ENSG00000164932	11411
CTIF	ENSG00000134030	6785
CTNNA1	ENSG00000044115	604
CTNNA2	ENSG00000066032	958
CTNNAL1	ENSG00000119326	4877
CTNNB1	ENSG00000168036	12184
CTNNBIP1	ENSG00000178585	14275
CTNND1	ENSG00000198561	17153
CTNND2	ENSG00000169862	12592
CTPS2	ENSG00000047230	617
CTSA	ENSG00000064601	890
CTSB	ENSG00000164733	11358
CTSC	ENSG00000109861	3705
CTSD	ENSG00000117984	4761
CTSE	ENSG00000196188	16459
CTSF	ENSG00000174080	13510
CTSG	ENSG00000100448	2311
CTSH	ENSG00000103811	2848
CTSK	ENSG00000143387	8346
CTSL	ENSG00000135047	6961
CTSO	ENSG00000256043	20944
CTSS	ENSG00000163131	10862
CTSV	ENSG00000136943	7346
CTSW	ENSG00000172543	13219
CTSZ	ENSG00000101160	2447
CTTN	ENSG00000085733	1669
CTTNBP2	ENSG00000077063	1368
CTTNBP2NL	ENSG00000143079	8271
CTXN1	ENSG00000178531	14268
CUEDC1	ENSG00000180891	14631
CUL3	ENSG00000036257	529
CUX1	ENSG00000257923	21050
CX3CL1	ENSG00000006210	131
CXADR	ENSG00000154639	9735
CXCL1	ENSG00000163739	11054
CXCL10	ENSG00000169245	12465
CXCL12	ENSG00000107562	3414
CXCL14	ENSG00000145824	8709
CXCL16	ENSG00000161921	10592
CXCL17	ENSG00000189377	16409
CXCL2	ENSG00000081041	1522
CXCL3	ENSG00000163734	11049
CXCL5	ENSG00000163735	11050
CXCL6	ENSG00000124875	5577
CXCL8	ENSG00000169429	12504
CXCR4	ENSG00000121966	5206
CXXC4	ENSG00000168772	12348
CXXC5	ENSG00000171604	13000
CYB561	ENSG00000008283	213
CYB5A	ENSG00000166347	11759
CYB5R2	ENSG00000166394	11770
CYBA	ENSG00000051523	695
CYBB	ENSG00000165168	11467
CYBRD1	ENSG00000071967	1170
CYFIP2	ENSG00000055163	747
CYGB	ENSG00000161544	10547
CYLD	ENSG00000083799	1606
CYP1A1	ENSG00000140465	7931
CYP1B1	ENSG00000138061	7553
CYP24A1	ENSG00000019186	392
CYP26A1	ENSG00000095596	2037
CYP26B1	ENSG00000003137	35
CYP27A1	ENSG00000135929	7139
CYP2C8	ENSG00000138115	7573
CYP2J2	ENSG00000134716	6906
CYP2R1	ENSG00000186104	15718
CYP2S1	ENSG00000167600	12050
CYP39A1	ENSG00000146233	8775
CYP3A5	ENSG00000106258	3264
CYP4B1	ENSG00000142973	8261
CYP4F11	ENSG00000171903	13070
CYP4F12	ENSG00000186204	15747
CYP4F3	ENSG00000186529	15821
CYP4V2	ENSG00000145476	8664
CYP51A1	ENSG00000001630	19
CYSLTR2	ENSG00000152207	9453
CYSRT1	ENSG00000197191	16763
CYSTM1	ENSG00000120306	5021
CYTH3	ENSG00000008256	210
CYTH4	ENSG00000100055	2170
CYTIP	ENSG00000115165	4366
CYTL1	ENSG00000170891	12822
DAAM1	ENSG00000100592	2344
DAAM2	ENSG00000146122	8762
DAB2	ENSG00000153071	9567
DAB2IP	ENSG00000136848	7309
DACT1	ENSG00000165617	11568
DACT3	ENSG00000197380	16807
DAG1	ENSG00000173402	13386
DAGLA	ENSG00000134780	6920
DAPK1	ENSG00000196730	16632
DAPK2	ENSG00000035664	522
DAPP1	ENSG00000070190	1104
DAXX	ENSG00000204209	17564
DBN1	ENSG00000113758	4219
DBNDD1	ENSG00000003249	37
DBNDD2	ENSG00000244274	20475
DBP	ENSG00000105516	3117
DCAF12L2	ENSG00000198354	17095
DCBLD1	ENSG00000164465	11297
DCBLD2	ENSG00000057019	770
DCC	ENSG00000187323	15977
DCDC2	ENSG00000146038	8746
DCHS1	ENSG00000166341	11756
DCLK1	ENSG00000133083	6672
DCLK2	ENSG00000170390	12711
DCN	ENSG00000011465	303
DCT	ENSG00000080166	1488
DCTN1	ENSG00000204843	17762
DDAH1	ENSG00000153904	9645
DDAH2	ENSG00000213722	18590
DDB2	ENSG00000134574	6888
DDC	ENSG00000132437	6552
DDIT3	ENSG00000175197	13705
DDIT4	ENSG00000168209	12218
DDIT4L	ENSG00000145358	8647
DDR1	ENSG00000204580	17699
DDR2	ENSG00000162733	10753
DDX10	ENSG00000178105	14207
DDX3X	ENSG00000215301	18781
DDX3Y	ENSG00000067048	994
DDX43	ENSG00000080007	1486
DDX5	ENSG00000108654	3560
DDX58	ENSG00000107201	3386
DDX6	ENSG00000110367	3763
DDX60	ENSG00000137628	7459
DDX60L	ENSG00000181381	14703
DECR1	ENSG00000104325	2894
DEF6	ENSG00000023892	437
DEFB1	ENSG00000164825	11383
DEGS2	ENSG00000168350	12259
DEK	ENSG00000124795	5569
DENND1C	ENSG00000205744	17935
DENND2A	ENSG00000146966	8858
DENND2D	ENSG00000162777	10771
DENND3	ENSG00000105339	3071
DENND5A	ENSG00000184014	15245
DENND5B	ENSG00000170456	12726
DEPDC7	ENSG00000121690	5171
DEPP1	ENSG00000165507	11545
DEPTOR	ENSG00000155792	9850
DERL3	ENSG00000099958	2142
DES	ENSG00000175084	13683
DGAT2	ENSG00000062282	841
DGCR6	ENSG00000183628	15143
DGCR8	ENSG00000128191	5960
DGKA	ENSG00000065357	925
DGKD	ENSG00000077044	1367
DGKE	ENSG00000153933	9649
DGKG	ENSG00000058866	797
DGKI	ENSG00000157680	10076
DGLUCY	ENSG00000133943	6771
DHCR24	ENSG00000116133	4526
DHCR7	ENSG00000172893	13289
DHRS2	ENSG00000100867	2392
DHRS3	ENSG00000162496	10687
DHRS7	ENSG00000100612	2353
DHRS9	ENSG00000073737	1242
DHX32	ENSG00000089876	1857
DHX58	ENSG00000108771	3573
DICER1	ENSG00000100697	2367
DIO2	ENSG00000211448	18368
DIP2C	ENSG00000151240	9331
DIPK1A	ENSG00000154511	9723
DIPK1B	ENSG00000165716	11602
DIRAS1	ENSG00000176490	13928
DIRAS3	ENSG00000162595	10708
DISP2	ENSG00000140323	7905
DIXDC1	ENSG00000150764	9283
DKK 1.00	ENSG00000107984	3469
DKK 2.00	ENSG00000155011	9778
DKK 3.00	ENSG00000050165	676
DLC1	ENSG00000164741	11360
DLG2	ENSG00000150672	9273
DLG3	ENSG00000082458	1570
DLG4	ENSG00000132535	6573
DLG5	ENSG00000151208	9326
DLGAP1	ENSG00000170579	12758
DLK1	ENSG00000185559	15583
DLK2	ENSG00000171462	12958
DLL1	ENSG00000198719	17203
DLX1	ENSG00000144355	8511
DLX2	ENSG00000115844	4485
DLX4	ENSG00000108813	3582
[truncated: 4,697 more rows]

## Sheet: Supplementary Table 6
Supplementary Table 5. Accuracy On Binding Site Detection on 26 Validation GDSC Drugs
[truncated: 25 more rows]
