# Supplementary material for: In Silico Drug Screening with Mechanistic Insight: A Cross-Attention Framework for Predicting Drug-Gene Interactions
Source: Research Square preprint supplement (doi:10.21203/rs.3.rs-7303015/v1), 2025-08-08
Supplement: Supplementary file 1 [file 15af049e58528eb8df6a28e6.pdf]

1 **Supplementary**

2 Supplementary Fig. 1: Histogram of Drug Response Values for the 24 Training Drugs Over 471  
3 Cancer Cell Lines

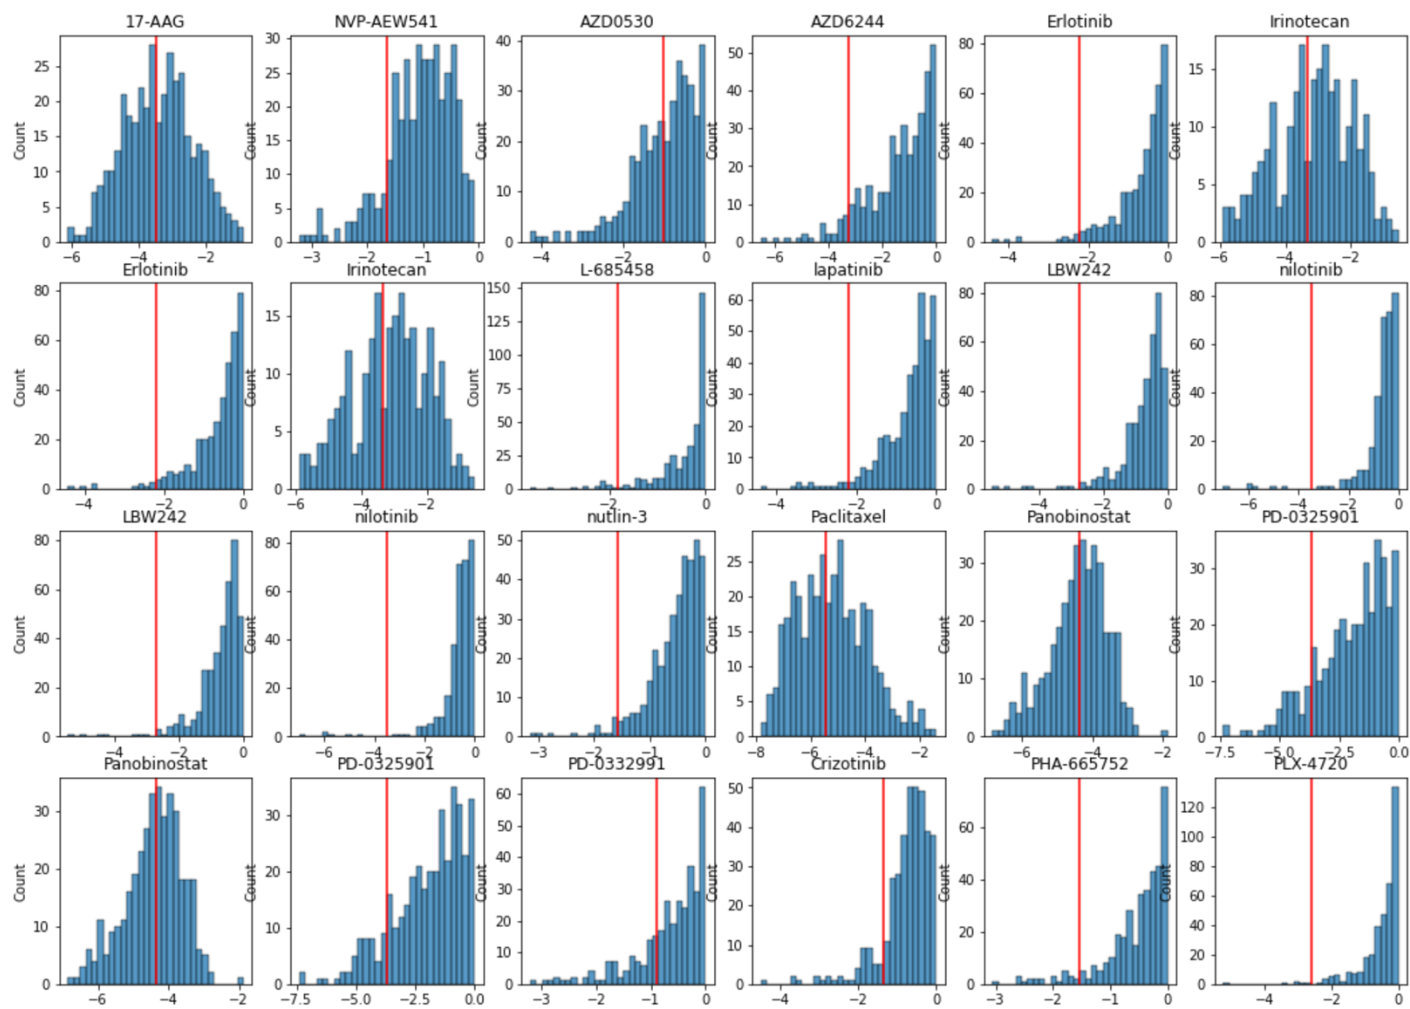

4  
5 Histogram of Drug Response Values for the 24 Training Drugs Over 471 Cancer Cell Lines. For  
6 each drug plot, the x-axis is the negative activity area values for drug response, and the y-axis is  
7 the total count. The red line on each plot is the cut-off computed by the m-cluster algorithm.

8 Supplementary Fig. 2: Drug Binding Sites Detection Across Various Protein Structures

**a**

|     | ABL1_3CS9_A | ABL1_3CS9_B | ABL1_3CS9_C | ABL1_3CS9_D | ABL1_5MO4_A |
|-----|-------------|-------------|-------------|-------------|-------------|
| O8  | Yes         | Yes         | Yes         | Yes         | Yes         |
| N9  | Yes         | Yes         | Yes         | Yes         | Yes         |
| C24 | No          | No          | No          | No          | No          |
| N26 | Yes         | Yes         | Yes         | Yes         | -           |
| C25 | -           | No          | No          | No          | No          |
| C29 | Yes         | Yes         | Yes         | Yes         | Yes         |
| C30 | -           | Yes         | Yes         | -           | Yes         |
| C33 | Yes         | -           | Yes         | -           | Yes         |
| N35 | No          | No          | No          | No          | No          |
| C36 | -           | Yes         | Yes         | Yes         | Yes         |
| C38 | Yes         | -           | Yes         | Yes         | Yes         |

**b**

|     | ALK_2XB7_A |
|-----|------------|
| O5  | Yes        |
| N16 | Yes        |
| C17 | Yes        |
| C18 | Yes        |
| N20 | Yes        |

**c**

|     | ALK_2XP2_A | ALK_2YFX_A | ALK_4ANQ_A | ALK_4ANS_A | ALK_5AAA_A | ALK_5AAB_A | ALK_5AAC_A | MET_2WGG_A | ROS1_3ZBF_A |
|-----|------------|------------|------------|------------|------------|------------|------------|------------|-------------|
| C5  | Yes        | Yes        | -          | -          | -          | -          | Yes        | -          | Yes         |
| C6  | Yes        | -          | Yes         |
| C7  | Yes        | -          | Yes         |
| C12 | -          | -          | Yes        | Yes        | Yes        | Yes        | -          | Yes        | Yes         |
| C13 | No          |
| N14 | Yes         |
| C15 | Yes        | -           |
| C28 | -          | No         | No         | No         | -          | No         | No         | -          | -           |
| N29 | Yes         |

Tables show all the actual binding atoms (rows in the table) for drugs: NILOTINIB, NVP-TAE684, and CRIZOTINIB. Each column in the table represents one protein pose. For every entry in the table, “Yes” means

the model detected that specific binding atom, and “No” means the model failed to detect that binding atom. **a.** The binding sites detection table for the Drug: NILOTINIB. **b.** The binding sites detection table for Drug: NVP-TAE684. **c.** The binding sites detection table for Drug” CRIZOTINIB.

Supplementary Fig. 3: Cross-Attention Gene Ranking with Top 20 Genes

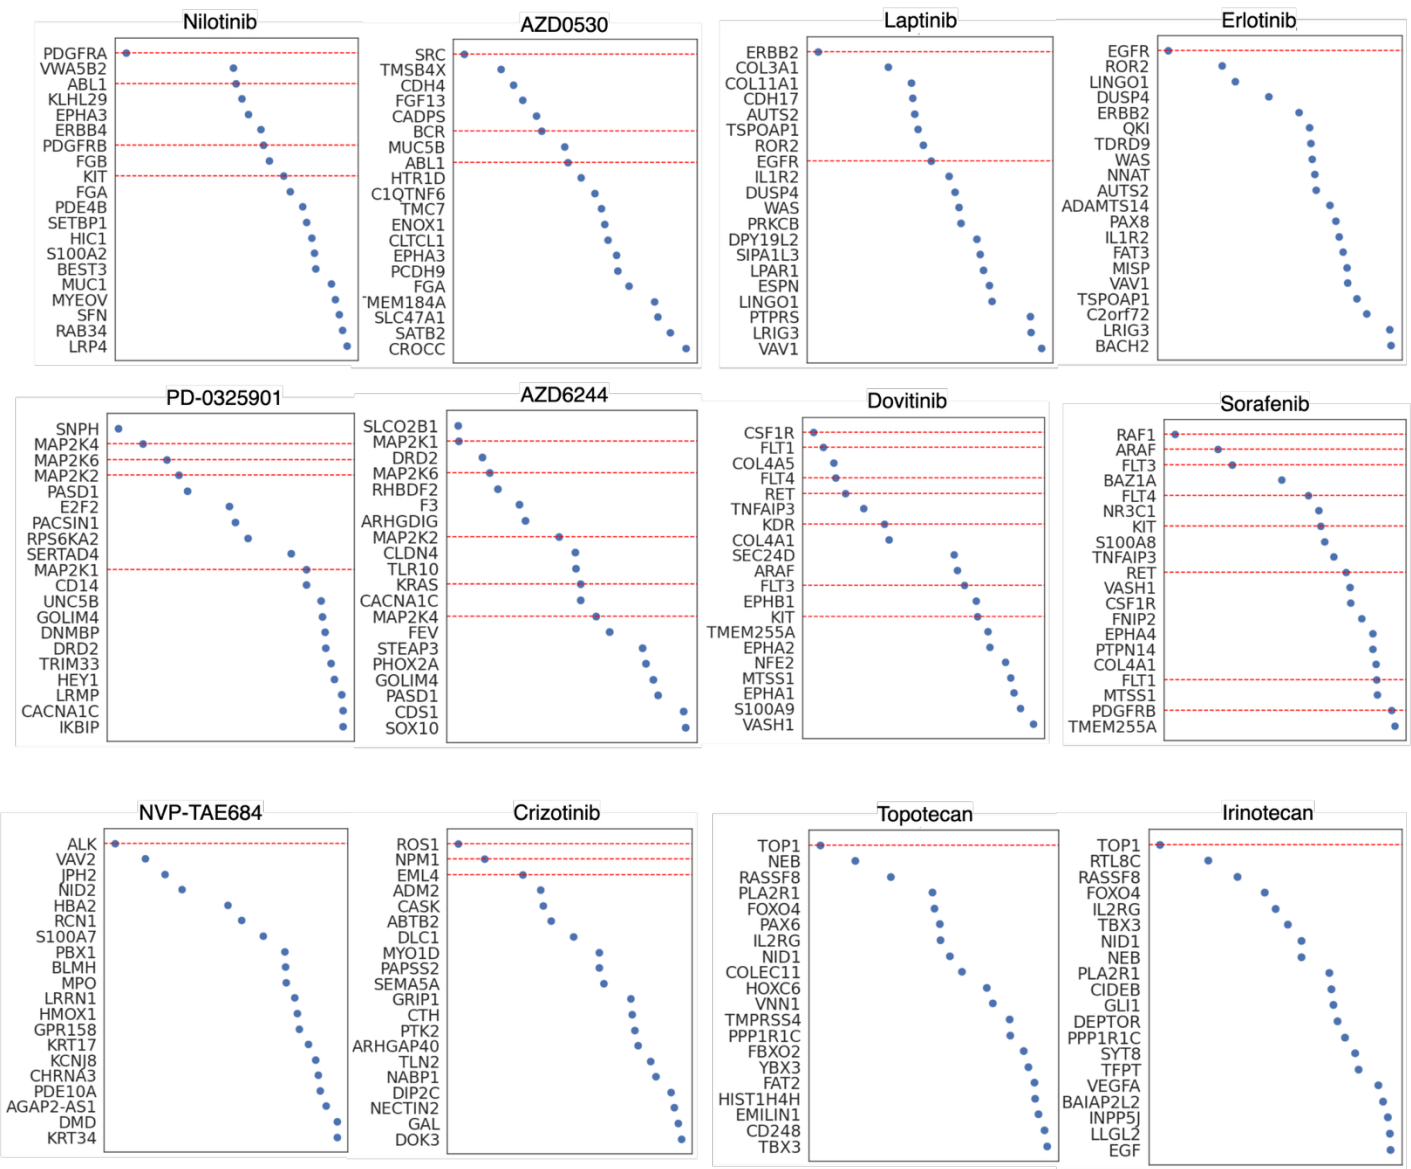

The zoomed-in top 20 cross-attention gene rankings corresponding to Fig. 3d. The dashed red lines correspond to the targeted genes for the drugs. Note that the total number of gene candidates is 6144. MIDI could still rank the target genes at the very top.

Supplementary Fig. 4: Cross-Attention Gene Ranking for Other Drugs in CCLE

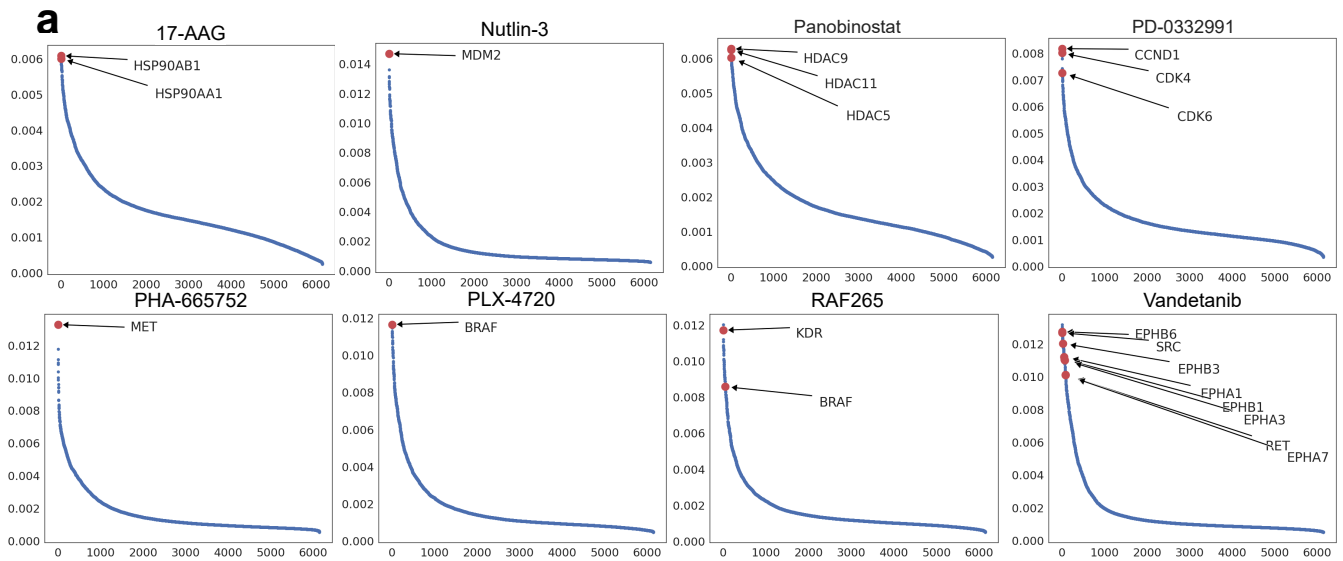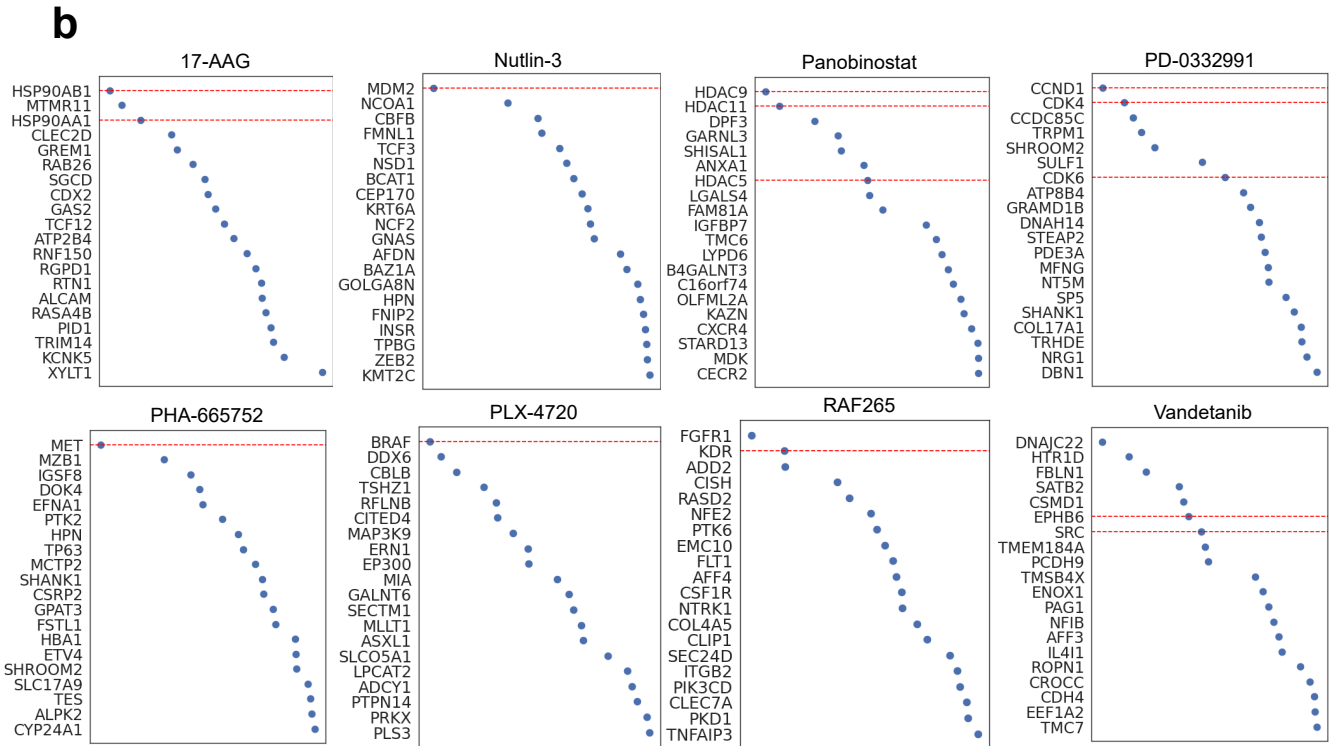

**a.** Gene cross-attention score for each drug in ranking order. **b.** The top 20 genes with the highest cross-attention score for each drug. All of the targeted genes are ranked at the top.

Supplementary Fig. 5 Gene Ranking Visualization for the 52 GDSC validation Drugs

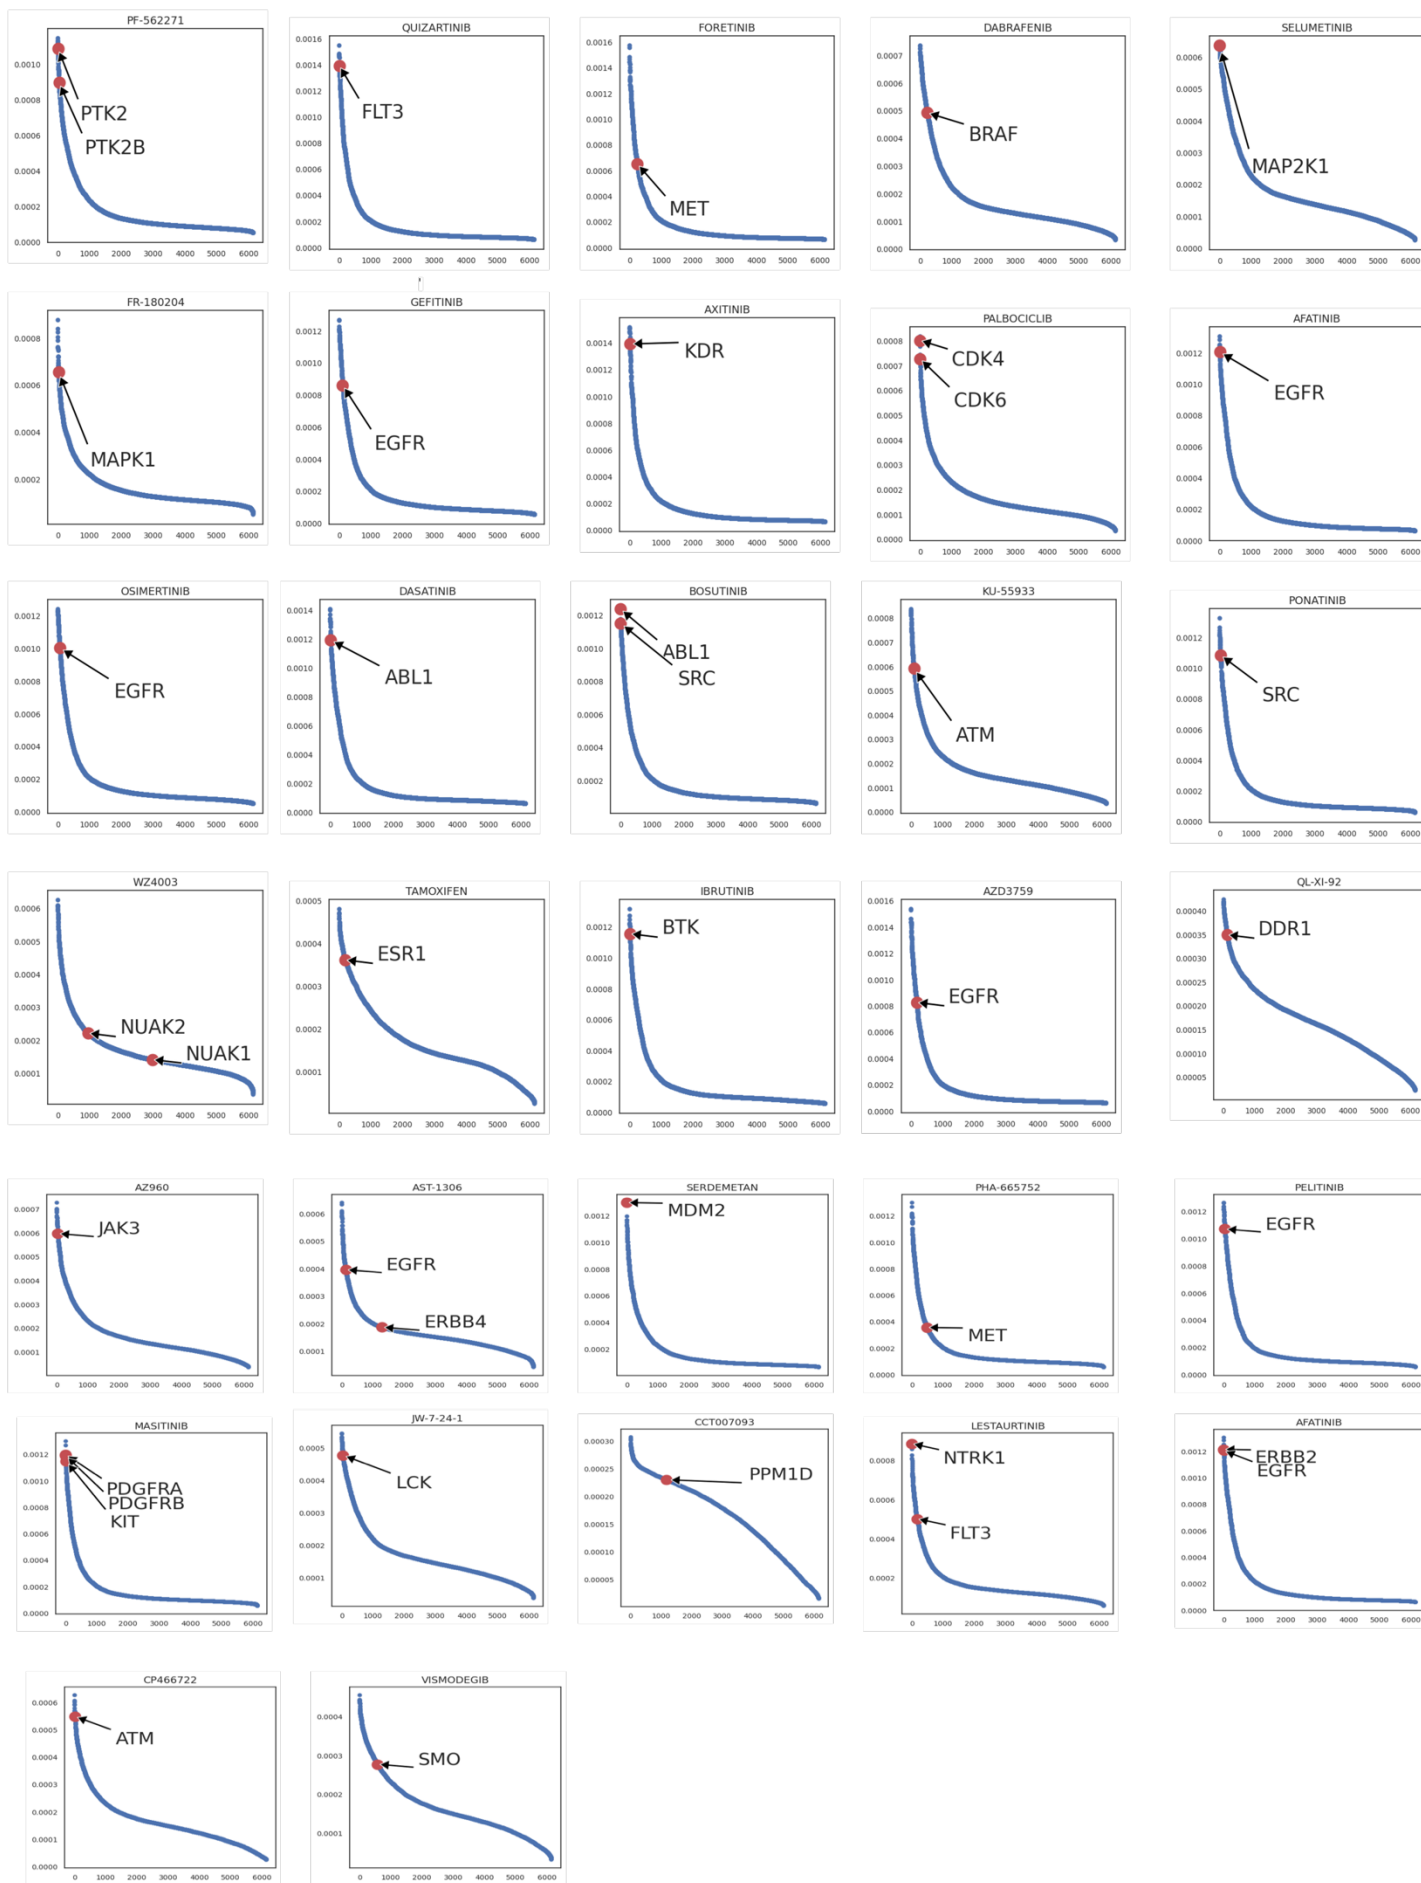

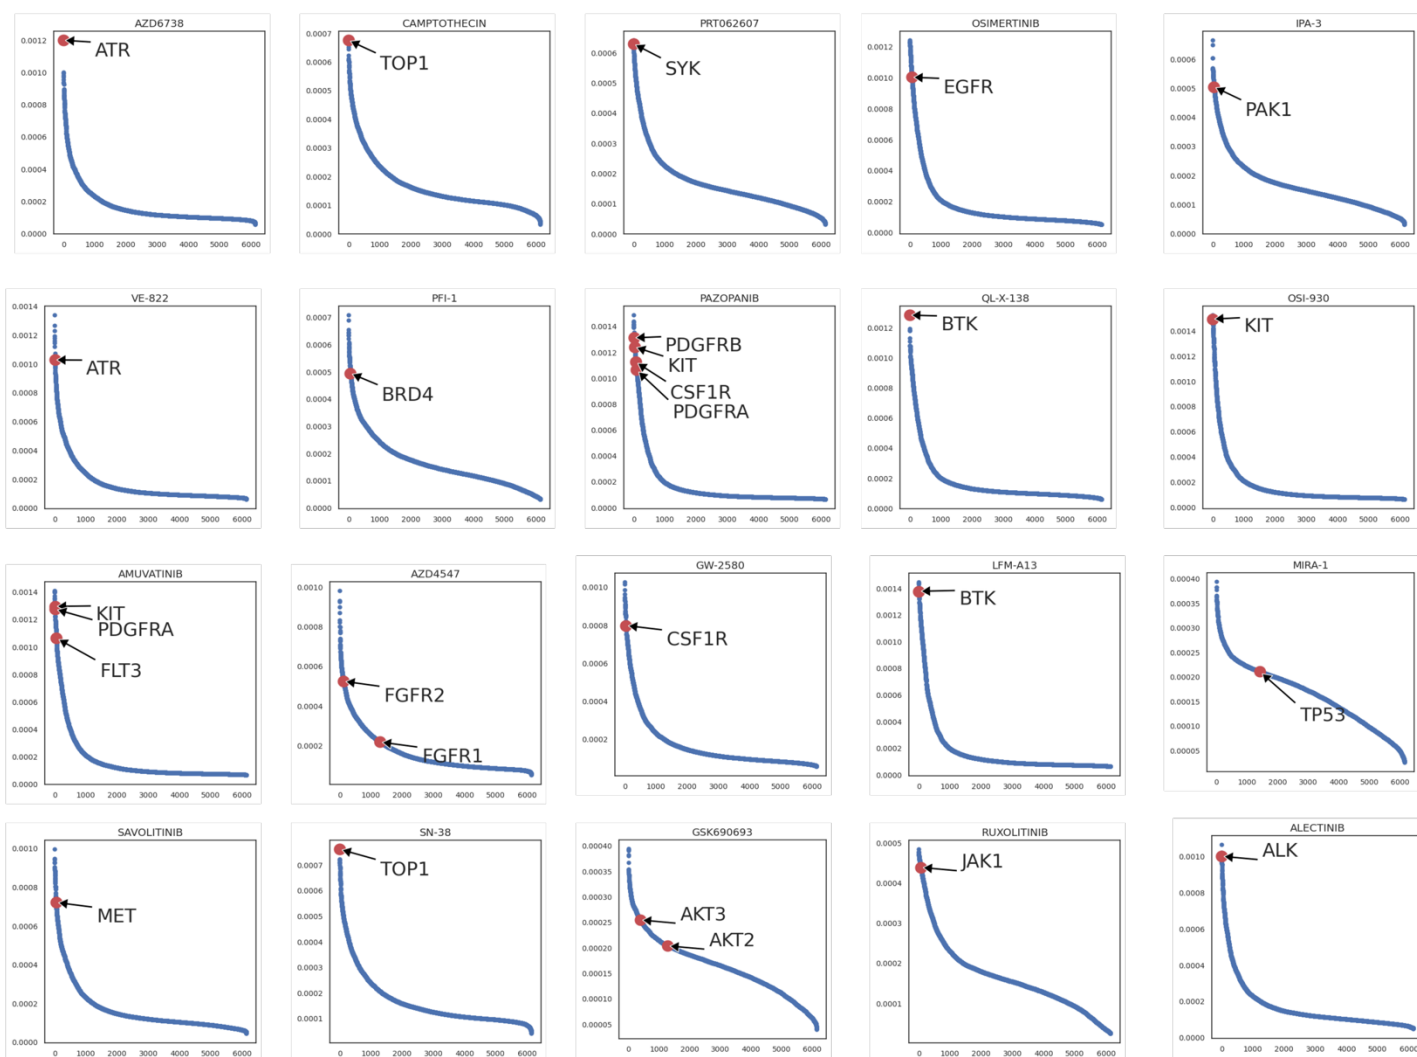

Target gene prediction on the 52 validation drugs from the GDSC dataset. The x-axis: the whole 6144 genes in ranking order. The y-axis: attention scores for the genes. The red dots: the target genes corresponding to the drugs. The drug names are recorded at the top of each plot. The prediction accuracy is shown in Extended Data Fig. 3f and Supplementary Fig. 7, where it shows that most of the predicted targeted genes are ranked within the top 200.

Supplementary Fig. 6: Drug Binding Site Detection for 24 of The Validation GDSC Drugs



| Drug Name | Target Gene | PDB_ID |
|-----------|-------------|--------|
| AFATINIB  | EGFR        | 6ZU8   |

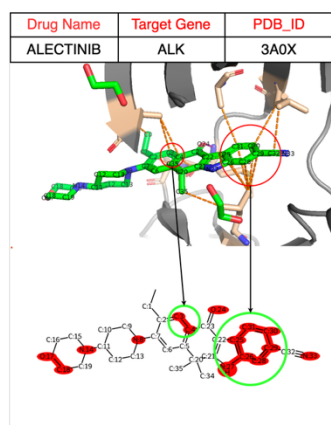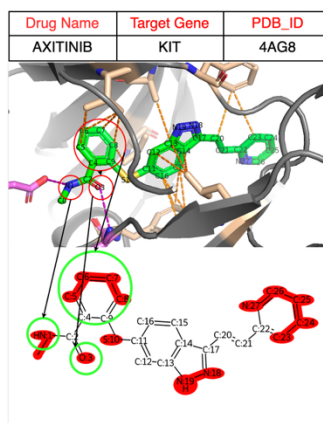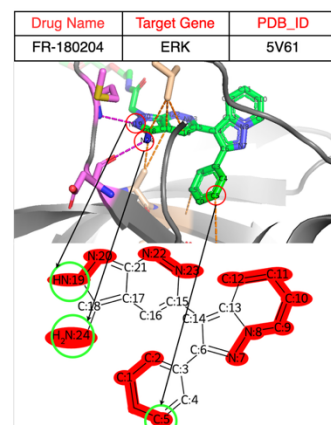

| Drug Name | Target Gene | PDB_ID |
|-----------|-------------|--------|
| AZD4547   | FGFR        | 4RWK   |

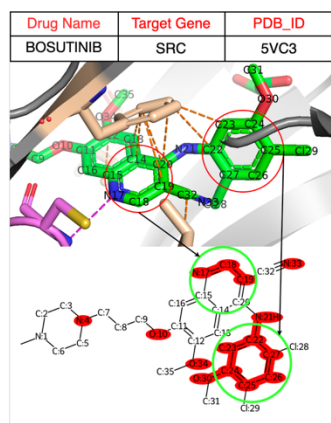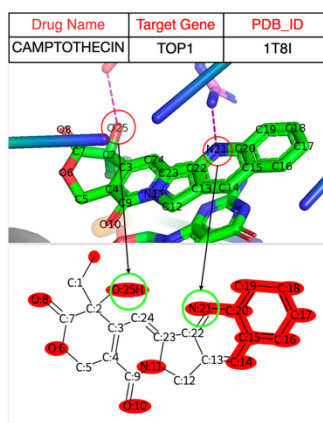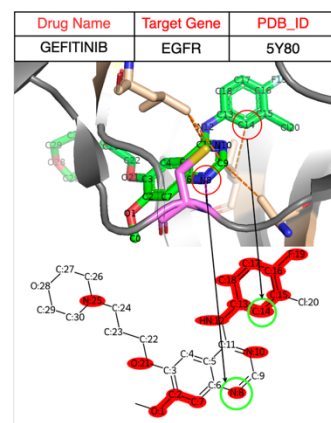[illegible]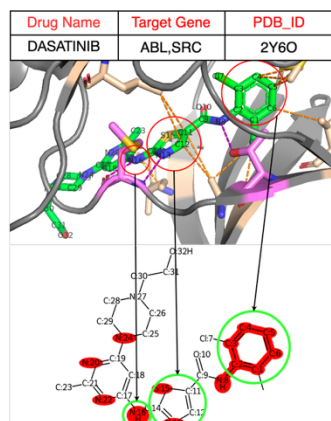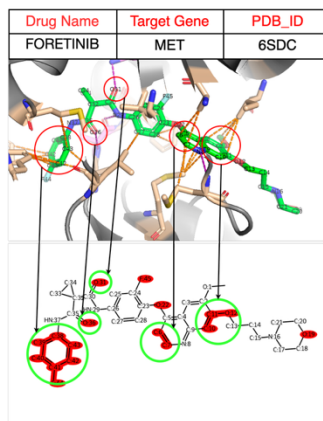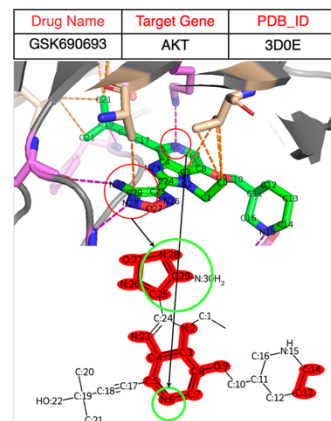

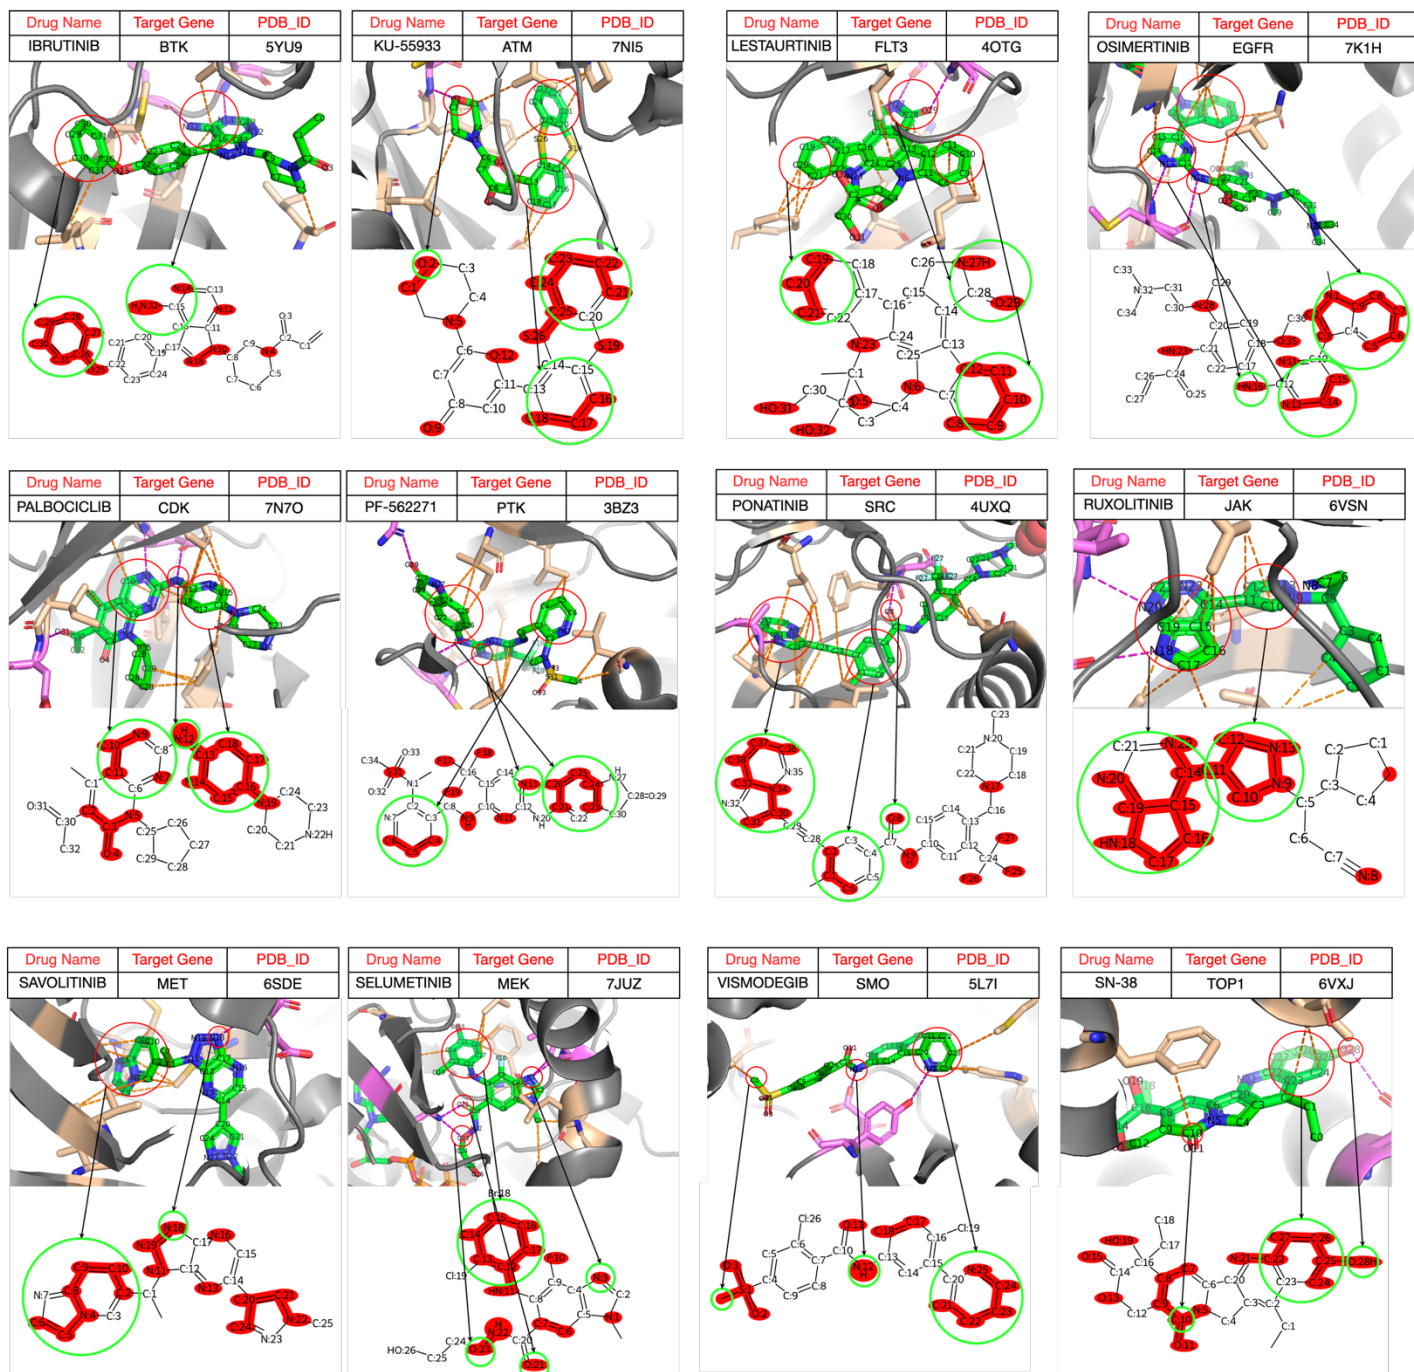

The drug-protein binding site detection of 24 GDSC validation drugs. We highlight the actual binding region in the PDB structure with red circles, and the corresponding detected binding region from MIDI in green circles. We report the accuracy of the atom detection result in Supplementary Table 6.

Supplementary Fig. 7: Scatter Plot of Target Gene Ranking for the 52 GDSC Validation Drugs



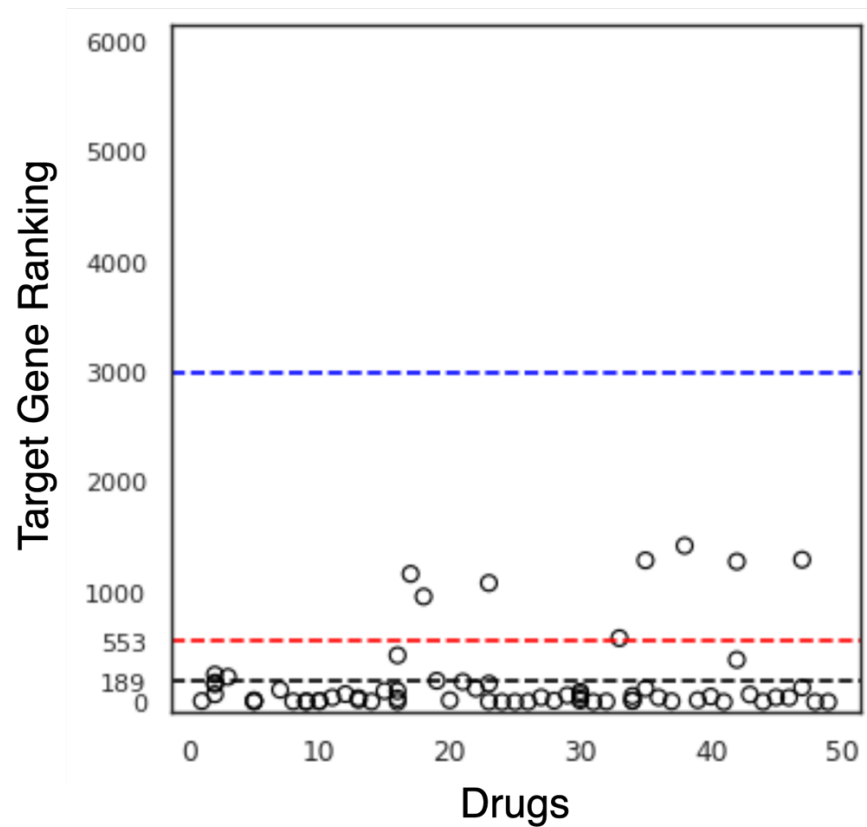

Target gene rankings prediction from MIDI for 52 validation drugs from the GDSC dataset. The x-axis represents randomly ordered validation drugs, and the y-axis represents the targeted genes for the drugs. The block dots are the target gene rankings for drugs, the black dashed line shows the mean value, and the red dashed line shows the first standard deviation. The plot shows that the mean value of targeted gene detection is 189 out of the whole 6144 gene candidates, demonstrating the strong target gene identification ability of MIDI.
